# Supplementary material for: eDNA metabarcoding shows highly diverse but distinct shallow, mid-water, and deep-water eukaryotic communities within a marine biodiversity hotspot
Source: PeerJ. 2025 Apr 22;13:e19249. doi: 10.7717/peerj.19249 (PMC12024446; doi:10.7717/peerj.19249)
Supplement: Supplemental Information 1 [file peerj-13-19249-s001.xlsx]

## Sheet: Table S1
TABLE S1. STATISTICS INCLUDING NUMBER OF SEQUENCE READS FOR EACH BIOINFORMATIC STEP FOR THE TOTAL SAMPLES
Region	Sample Name	Sample ID	# reads	# merge reads	% merge	# discarted QC	# passed reads	% Passed				Shallow
NGC	Ángel de la Guarda	sn1	48094	31101	64.67	2114	28987	93.2				Mid-water
	Canal de Ballenas	sn2	213625	146715	68.68	7019	139696	95.3				Deep-water depth
	San Esteban	sn3	192574	144713	75.15	8260	136453	94.3				Mock and negatives
	San Pedro Mártir	sn4	102631	61651	60.07	3938	57713	93.6
CGC	Guaymas	sc1	86018	24020	27.92	2576	21444	89.3				Dereplicate and count step
	Huatabampo	sc2	72996	6555	8.98	1953	4602	70.2				2665720 seq
	San Damián	sc3	261364	120195	45.99	11459	108736	90.5				976196 unique
	San Marcial	sc4	160644	101309	63.03	7534	93775	92.6				228953 uniques written
	San Mateo	sc5	321315	236853	73.71	11561	225292	95.1				298412clusters size <2 discarted 30.6%
	Punta Botella	sc6	458733	94235	20.54	10762	83473	88.6				747243 singletones (76.5%)
	Santa Cruz	sc7	140424	79272	56.45	4823	74449	93.9
	Las Animas	sc8	346911	62286	17.95	7205	55081	88.4				Clustering step
	San Francisquito	sc9	103323	71192	68.9	5151	66041	92.8				11922 OTUs 85.6% matched
	Punta Coyote	sc10	55461	18126	32.68	2119	16007	88.3				31775 chimeras
	El Bajo	sc11	97417	64946	66.67	4625	60321	92.9
SGC	Yelapa	ss1	124586	66872	53.68	4134	62738	93.8
NGC	Ángel de la Guarda	dn1	269222	186728	69.36	9183	177545	95.1
	Canal de Ballenas	dn2	8628	2317	26.85	602	1715	74
	San Esteban	dn3	92905	73442	79.05	3634	69808	95.1
	San Pedro Mártir	dn4	15748	3204	20.35	587	2617	81.7
CGC	Guaymas	dc1	278465	39930	14.34	3183	36747	92
	Huatabampo	dc2	178932	155815	87.08	7192	148623	95.4
	San Damián	dc3	25504	3057	11.99	1686	1371	44.8
	San Marcial	dc4	86679	56888	65.63	3338	53550	94.1
	San Mateo	dc5	149542	77272	7192	4820	72452	93.8
	Punta Botella	dc6	217485	101953	46.88	6542	95411	93.6
	Santa Cruz	dc7	84833	22857	26.94	3040	19817	86.7
	Las Animas	dc8	58039	36017	62.06	2396	33621	93.3
	San Francisquito	dc9	22308	5133	23.01	1128	4005	78
	Punta Coyote	dc10	27067	4626	17.09	2373	2253	48.7
	El Bajo	dc11	214275	92434	43.14	7559	84875	91.8
SGC	Yelapa	ds1	114865	64835	56.44	3824	61011	94.1
	Mock		18440	10528	57.09	1946	8582	81.5
	PCR_neg1		1628	555	34.09	100	455	82
	PCR_neg2		2011	494	24.56	237	257	52
	PCR_neg3		1123	138	12.29	71	67	48.6
	Field_neg1		1075	313	29.12	154	159	50.8
	Field_neg2		641	169	26.37	66	103	60.9
	Field_neg3		1301	314	24.14	139	175	55.7
	Extraction_neg1		3341	560	16.76	307	253	45.2
	Extraction_neg2		2682	304	11.33	178	126	41.4
	Extraction_neg3		2733	446	16.32	185	261	58.5
	Total		4665588	2270370		159703	2110667

## Sheet: Table S2
TABLE S2. SUMMARY OF OTUs PRESENT IN THE NEGATIVE CONTROLS
#OTU ID	PCR_neg1	PCR_neg2	PCR_neg3	Field_neg1	Field_neg2	Field_neg3	Extraction_neg1	Extraction_neg2	Extraction_neg3	Sum_Reads		NCBI	BOLD
46	53	139	46	92	37	71	167	73	91	769	9	root;cellular organisms;Eukaryota;Opisthokonta;Metazoa;Eumetazoa;Cnidaria;Scyphozoa;Rhizostomeae;Rhizostomatidae;Stomolophus;Stomolophus meleagris;
1851	82	0	0	0	0	0	0	0	0	82	1	root;cellular organisms;Eukaryota;Opisthokonta;Fungi;Dikarya;Ascomycota;saccharomyceta;Pezizomycotina;leotiomyceta;sordariomyceta;
4143	4	13	0	15	0	7	28	10	5	82	7	root;cellular organisms;Eukaryota;Opisthokonta;Metazoa;Eumetazoa;Cnidaria;Scyphozoa;Rhizostomeae;Rhizostomatidae;Stomolophus;Stomolophus meleagris;
1061	0	0	0	0	0	0	1	0	58	59	2	root;cellular organisms;Eukaryota;Opisthokonta;Metazoa;Eumetazoa;Bilateria;Deuterostomia;Chordata;Craniata;Vertebrata;Gnathostomata;Teleostomi;Euteleostomi;Actinopterygii;Actinopteri;Neopterygii;Teleostei;Osteoglossocephalai;Clupeocephala;Euteleosteomorpha;Neoteleostei;Eurypterygia;Ctenosquamata;Acanthomorphata;Euacanthomorphacea;Percomorphaceae;Eupercaria;Perciformes;Serranoidei;Serranidae;Epine…
572	0	0	0	0	0	0	0	0	39	39	1	root;cellular organisms;Eukaryota;Stramenopiles;
8848	0	24	0	0	0	0	0	0	1	25	2	root;cellular organisms;Eukaryota;	Cnidaria;80.26
8	0	4	0	2	2	2	3	2	5	20	7	root;cellular organisms;Eukaryota;Stramenopiles;Pelagophyceae;Pelagomonadales;Pelagomonas;Pelagomonas calceolata;
3884	18	0	0	0	0	0	0	0	0	18	1	root;cellular organisms;Eukaryota;	Mollusca;84.34
6162	17	0	0	0	0	0	0	0	0	17	1	root;cellular organisms;Eukaryota;	Ochrophyta;77.78
6287	16	0	0	0	0	0	0	0	0	16	1	root;cellular organisms;Eukaryota;Opisthokonta;Metazoa;Eumetazoa;Bilateria;Protostomia;Lophotrochozoa;Rotifera;Monogononta;Pseudotrocha;Ploima;Synchaetidae;Polyarthra;
4984	3	11	0	0	0	0	0	0	0	14	2	root;cellular organisms;Eukaryota;Opisthokonta;
6161	14	0	0	0	0	0	0	0	0	14	1	root;cellular organisms;Eukaryota;	Mollusca;83.95
4	0	0	0	0	0	0	12	0	0	12	1	root;cellular organisms;Eukaryota;Opisthokonta;Metazoa;Eumetazoa;Bilateria;Protostomia;Ecdysozoa;Panarthropoda;Arthropoda;Mandibulata;Pancrustacea;Crustacea;Maxillopoda;Copepoda;Neocopepoda;Podoplea;Poecilostomatoida;Sapphirinidae;Copilia;Copilia mirabilis;
128	0	0	0	0	0	1	0	0	11	12	2	root;cellular organisms;Eukaryota;	Mollusca;83.12
2930	0	0	0	0	0	11	0	0	0	11	1	root;cellular organisms;Eukaryota;Opisthokonta;Metazoa;Eumetazoa;Bilateria;Deuterostomia;Chordata;Craniata;Vertebrata;Gnathostomata;Teleostomi;Euteleostomi;Actinopterygii;Actinopteri;Neopterygii;Teleostei;Osteoglossocephalai;Clupeocephala;Otomorpha;Clupei;Clupeiformes;Clupeoidei;Clupeidae;Clupeinae;Opisthonema;Opisthonema libertate;
7047	9	0	0	0	0	0	2	0	0	11	2	root;cellular organisms;Eukaryota;Amoebozoa;Discosea;Longamoebia;Centramoebida;Acanthamoebidae;Acanthamoeba;
19	0	2	0	3	1	1	3	0	0	10	5	root;cellular organisms;Eukaryota;	Rhodophyta;80.26
94	1	3	0	2	1	1	1	1	0	10	7	root;cellular organisms;Eukaryota;
8589	0	10	0	0	0	0	0	0	0	10	1	root;cellular organisms;Eukaryota;Opisthokonta;Fungi;Dikarya;Ascomycota;saccharomyceta;Pezizomycotina;leotiomyceta;sordariomyceta;Sordariomycetes;Hypocreomycetidae;Hypocreales;
59	1	0	1	4	0	1	2	0	0	9	5	root;cellular organisms;Eukaryota;Alveolata;Dinophyceae;
5150	0	0	0	0	0	9	0	0	0	9	1	root;cellular organisms;Eukaryota;Opisthokonta;Metazoa;Eumetazoa;Bilateria;Protostomia;Ecdysozoa;Panarthropoda;Arthropoda;Mandibulata;Pancrustacea;Crustacea;Maxillopoda;Copepoda;Neocopepoda;Gymnoplea;Calanoida;
9476	9	0	0	0	0	0	0	0	0	9	1	root;cellular organisms;Eukaryota;Apusozoa;Apusomonadidae;Thecamonas;Thecamonas trahens;
3250	0	8	0	0	0	0	0	0	0	8	1	root;cellular organisms;Eukaryota;Opisthokonta;Metazoa;Eumetazoa;Bilateria;Protostomia;Ecdysozoa;Panarthropoda;Arthropoda;Mandibulata;Pancrustacea;
6	0	3	0	0	4	0	0	0	0	7	2	root;cellular organisms;Eukaryota;Opisthokonta;Metazoa;Eumetazoa;Bilateria;Protostomia;Ecdysozoa;Panarthropoda;Arthropoda;
39	3	0	0	0	0	1	2	0	1	7	4	root;cellular organisms;Eukaryota;Viridiplantae;Chlorophyta;prasinophytes;Mamiellophyceae;Mamiellales;Bathycoccaceae;Bathycoccus;Bathycoccus prasinos;
49	0	0	1	1	0	0	3	2	0	7	4	root;cellular organisms;Eukaryota;	Chlorophyta;80.66
54	1	0	0	2	1	1	0	2	0	7	5	root;cellular organisms;Eukaryota;Opisthokonta;Metazoa;Eumetazoa;Bilateria;Protostomia;Ecdysozoa;Panarthropoda;Arthropoda;Mandibulata;Pancrustacea;Crustacea;Branchiopoda;Phyllopoda;Diplostraca;Cladocera;Ctenopoda;Sididae;Penilia;Penilia avirostris;
4238	7	0	0	0	0	0	0	0	0	7	1	root;cellular organisms;	Rhodophyta;Bangiophyceae;85.95
7903	0	0	0	3	0	1	1	2	0	7	4	root;cellular organisms;Eukaryota;Opisthokonta;Metazoa;Eumetazoa;Cnidaria;Scyphozoa;Rhizostomeae;Rhizostomatidae;Stomolophus;Stomolophus meleagris;
5	0	0	0	0	5	0	0	1	0	6	2	root;cellular organisms;Eukaryota;Opisthokonta;Metazoa;Eumetazoa;Bilateria;Protostomia;Ecdysozoa;Panarthropoda;Arthropoda;Mandibulata;Pancrustacea;Crustacea;Maxillopoda;Copepoda;Neocopepoda;Gymnoplea;Calanoida;
27	1	1	1	0	0	2	0	1	0	6	5	root;cellular organisms;Eukaryota;Opisthokonta;Metazoa;Eumetazoa;Bilateria;Protostomia;
88	6	0	0	0	0	0	0	0	0	6	1	root;cellular organisms;Eukaryota;Stramenopiles;Bacillariophyta;Coscinodiscophyceae;Chaetocerotophycidae;Chaetocerotales;Chaetocerotaceae;Chaetoceros;Chaetoceros tenuissimus;
154	1	0	1	2	0	0	1	1	0	6	5	root;cellular organisms;
14	0	1	0	1	0	1	2	0	0	5	4	root;cellular organisms;Eukaryota;	Porifera;78.64
43	0	3	0	1	0	0	0	0	1	5	3	root;cellular organisms;Eukaryota;Opisthokonta;Metazoa;
62	5	0	0	0	0	0	0	0	0	5	1	root;cellular organisms;Eukaryota;Opisthokonta;Metazoa;Eumetazoa;Bilateria;Protostomia;Ecdysozoa;Panarthropoda;Arthropoda;Mandibulata;Pancrustacea;Crustacea;Maxillopoda;Copepoda;Neocopepoda;Gymnoplea;Calanoida;
2929	5	0	0	0	0	0	0	0	0	5	1	root;cellular organisms;Eukaryota;Opisthokonta;Fungi;Dikarya;Ascomycota;saccharomyceta;Pezizomycotina;leotiomyceta;Eurotiomycetes;Eurotiomycetidae;Eurotiales;Aspergillaceae;Aspergillus;Aspergillus puulaauensis;
10323	5	0	0	0	0	0	0	0	0	5	1	root;cellular organisms;Eukaryota;Cryptophyta;Pyrenomonadales;Pyrenomonadaceae;Rhodomonas;Rhodomonas salina;
1	0	1	0	1	0	0	0	1	1	4	4	root;cellular organisms;Eukaryota;Viridiplantae;Chlorophyta;prasinophytes;unclassified Prasinophyceae;Prasinophyceae sp. CCMP1205;
10	0	0	0	0	0	0	0	0	4	4	1	root;cellular organisms;Eukaryota;Opisthokonta;Metazoa;Eumetazoa;Bilateria;Protostomia;Lophotrochozoa;Gastrotricha;Macrodasyida;Macrodasyidae;Urodasys;Urodasys sp. 114a;
13	0	0	0	0	1	0	2	0	1	4	3	root;cellular organisms;Eukaryota;Opisthokonta;Metazoa;Eumetazoa;Bilateria;Protostomia;Ecdysozoa;Panarthropoda;Arthropoda;Mandibulata;Pancrustacea;
17	0	0	0	1	0	3	0	0	0	4	2	root;cellular organisms;Eukaryota;Alveolata;Dinophyceae;
21	0	0	0	0	0	4	0	0	0	4	1	root;cellular organisms;Eukaryota;Opisthokonta;Metazoa;Eumetazoa;Bilateria;Protostomia;Ecdysozoa;Panarthropoda;Arthropoda;Mandibulata;Pancrustacea;Crustacea;Maxillopoda;Copepoda;Neocopepoda;Podoplea;Poecilostomatoida;Corycaeidae;Corycaeus;Corycaeus affinis;
38	0	1	0	1	1	1	0	0	0	4	4	root;cellular organisms;Eukaryota;Alveolata;Dinophyceae;
69	0	0	1	2	0	1	0	0	0	4	3	root;cellular organisms;Eukaryota;Opisthokonta;Metazoa;Eumetazoa;Cnidaria;Anthozoa;Hexacorallia;Scleractinia;Fungiina;Siderastreidae;Siderastrea;
341	0	0	0	0	0	0	4	0	0	4	1	root;cellular organisms;Eukaryota;Opisthokonta;Metazoa;Eumetazoa;Bilateria;Protostomia;Ecdysozoa;Panarthropoda;Arthropoda;Mandibulata;Pancrustacea;Crustacea;Maxillopoda;Copepoda;Neocopepoda;Gymnoplea;Calanoida;
464	1	2	0	0	0	0	1	0	0	4	3	root;cellular organisms;Eukaryota;Alveolata;Dinophyceae;Gymnodiniales;Gymnodiniaceae;
3175	4	0	0	0	0	0	0	0	0	4	1	root;cellular organisms;Eukaryota;	Rhodophyta;84.31
4261	4	0	0	0	0	0	0	0	0	4	1	root;cellular organisms;Eukaryota;	Bacillariophyta;83.99
6106	0	0	0	0	0	4	0	0	0	4	1	root;cellular organisms;Eukaryota;Opisthokonta;Metazoa;Eumetazoa;Bilateria;Protostomia;Ecdysozoa;Nematoda;Chromadorea;Araeolaimida;Plectoidea;Plectidae;Plectus;Plectus aquatilis;
7681	4	0	0	0	0	0	0	0	0	4	1	root;cellular organisms;Eukaryota;Stramenopiles;PX clade;Phaeophyceae;
2	0	0	0	0	3	0	0	0	0	3	1	root;cellular organisms;Eukaryota;Opisthokonta;Metazoa;Eumetazoa;Bilateria;Protostomia;Ecdysozoa;Panarthropoda;Arthropoda;Mandibulata;Pancrustacea;Crustacea;Maxillopoda;Copepoda;
11	0	0	3	0	0	0	0	0	0	3	1	root;cellular organisms;Eukaryota;Opisthokonta;Metazoa;Eumetazoa;Bilateria;Protostomia;Ecdysozoa;Panarthropoda;Arthropoda;Mandibulata;Pancrustacea;Crustacea;Maxillopoda;Copepoda;Neocopepoda;Podoplea;Cyclopoida;Cyclopidae;Diacyclops;Diacyclops konstantini;
29	0	1	0	0	0	0	1	1	0	3	3	root;cellular organisms;Eukaryota;Opisthokonta;Metazoa;Eumetazoa;Bilateria;Protostomia;
121	1	0	0	0	0	0	2	0	0	3	2	root;cellular organisms;Eukaryota;Opisthokonta;Metazoa;Eumetazoa;Bilateria;Protostomia;Ecdysozoa;Panarthropoda;Arthropoda;Mandibulata;Pancrustacea;Crustacea;Maxillopoda;Copepoda;Neocopepoda;Gymnoplea;Calanoida;
198	1	1	0	0	0	0	0	0	1	3	3	root;cellular organisms;Eukaryota;Alveolata;Dinophyceae;
365	0	1	0	0	1	0	1	0	0	3	3	root;cellular organisms;Eukaryota;Rhodophyta;Florideophyceae;Hapalidiales;Hapalidiaceae;Melobesioideae;Phymatolithon;Phymatolithon sp. 2CPVP;
767	1	1	0	0	0	0	0	0	1	3	3	root;cellular organisms;Eukaryota;Stramenopiles;Bacillariophyta;Bacillariophyceae;Bacillariophycidae;Bacillariales;Bacillariaceae;Pseudo-nitzschia;Pseudo-nitzschia delicatissima;
4637	3	0	0	0	0	0	0	0	0	3	1	root;cellular organisms;Eukaryota;Opisthokonta;Fungi;Dikarya;Ascomycota;saccharomyceta;Pezizomycotina;leotiomyceta;sordariomyceta;
3	0	0	0	1	0	0	0	1	0	2	2	root;cellular organisms;Eukaryota;Stramenopiles;PX clade;Phaeophyceae;Fucales;Hormosiraceae;Hormosira;Hormosira banksii;
30	0	0	0	0	0	0	0	2	0	2	1	root;cellular organisms;Eukaryota;Viridiplantae;Chlorophyta;prasinophytes;unclassified Prasinophyceae;Prasinophyceae sp. CCMP1205;
31	0	0	0	1	0	0	0	1	0	2	2	root;cellular organisms;Eukaryota;Opisthokonta;Metazoa;Eumetazoa;Bilateria;Protostomia;Ecdysozoa;Panarthropoda;Arthropoda;Mandibulata;Pancrustacea;
34	0	0	0	0	0	2	0	0	0	2	1	root;cellular organisms;Eukaryota;Viridiplantae;Chlorophyta;prasinophytes;Mamiellophyceae;Mamiellales;Mamiellaceae;Micromonas;Micromonas pusilla;
35	0	0	0	0	0	0	1	0	1	2	2	root;cellular organisms;Eukaryota;Opisthokonta;Metazoa;Eumetazoa;Bilateria;Protostomia;Ecdysozoa;Panarthropoda;Arthropoda;Mandibulata;Pancrustacea;Crustacea;Maxillopoda;Copepoda;Neocopepoda;Gymnoplea;Calanoida;Paracalanidae;Paracalanus;Paracalanus sp. C AC-2013;
36	0	0	0	0	0	0	2	0	0	2	1	root;cellular organisms;Eukaryota;Opisthokonta;Metazoa;Eumetazoa;Bilateria;Protostomia;Ecdysozoa;Panarthropoda;Arthropoda;Mandibulata;Pancrustacea;Crustacea;Maxillopoda;Copepoda;Neocopepoda;Podoplea;Cyclopoida;Oithonidae;Oithona;Oithona simplex;
52	0	0	0	0	2	0	0	0	0	2	1	root;cellular organisms;Eukaryota;Opisthokonta;Metazoa;Eumetazoa;Bilateria;Protostomia;Ecdysozoa;Nematoda;Chromadorea;
58	0	0	0	0	0	1	0	0	1	2	2	root;cellular organisms;Eukaryota;Opisthokonta;Metazoa;Eumetazoa;Cnidaria;Hydrozoa;Hydroidolina;
73	2	0	0	0	0	0	0	0	0	2	1	root;cellular organisms;Eukaryota;Stramenopiles;Bacillariophyta;Mediophyceae;Cymatosirophycidae;Cymatosirales;Cymatosiraceae;Minutocellus;Minutocellus polymorphus;
75	0	0	0	2	0	0	0	0	0	2	1	root;cellular organisms;Eukaryota;Opisthokonta;Metazoa;Eumetazoa;Bilateria;Protostomia;Ecdysozoa;Panarthropoda;Arthropoda;Mandibulata;Pancrustacea;
96	0	0	1	0	0	1	0	0	0	2	2	root;cellular organisms;Eukaryota;
118	1	0	0	1	0	0	0	0	0	2	2	root;cellular organisms;Eukaryota;	Arthropoda;Copepoda;Calanoida;90.94
203	0	0	0	0	0	2	0	0	0	2	1	root;cellular organisms;Eukaryota;
207	0	1	0	0	0	1	0	0	0	2	2	root;cellular organisms;Eukaryota;Alveolata;Dinophyceae;Gymnodiniales;Kareniaceae;
217	0	0	0	0	0	0	0	1	1	2	2	root;cellular organisms;Eukaryota;
289	0	1	0	1	0	0	0	0	0	2	2	root;cellular organisms;Eukaryota;Opisthokonta;Metazoa;Eumetazoa;Cnidaria;Scyphozoa;Rhizostomeae;Rhizostomatidae;Stomolophus;
371	0	0	0	0	0	0	0	0	2	2	1	root;cellular organisms;Eukaryota;	Heterokontophyta;79.61
389	0	0	0	0	0	0	0	2	0	2	1	root;cellular organisms;Eukaryota;Opisthokonta;Metazoa;Eumetazoa;Ctenophora;Tentaculata;Cestida;Cestidae;Cestum;Cestum veneris;
7674	2	0	0	0	0	0	0	0	0	2	1	root;cellular organisms;Eukaryota;Stramenopiles;Bacillariophyta;Bacillariophyceae;Bacillariophycidae;Cymbellales;Cymbellaceae;Encyonema;Encyonema sp. WJS-2015a;
8051	0	0	0	0	2	0	0	0	0	2	1	root;cellular organisms;Eukaryota;Opisthokonta;Metazoa;Eumetazoa;Bilateria;Protostomia;Ecdysozoa;Nematoda;Chromadorea;Rhabditida;Rhabditoidea;Diploscapteridae;Diploscapter;Diploscapter coronatus;
9140	2	0	0	0	0	0	0	0	0	2	1	root;cellular organisms;Eukaryota;
9910	0	0	0	0	0	0	0	0	2	2	1	root;cellular organisms;Eukaryota;Opisthokonta;Metazoa;Eumetazoa;Bilateria;Deuterostomia;Chordata;Craniata;Vertebrata;Gnathostomata;Teleostomi;Euteleostomi;Actinopterygii;
10324	2	0	0	0	0	0	0	0	0	2	1	root;cellular organisms;Eukaryota;
11195	0	0	0	0	0	2	0	0	0	2	1	root;cellular organisms;Eukaryota;Opisthokonta;Metazoa;Eumetazoa;Bilateria;
16	0	0	0	1	0	0	0	0	0	1	1	root;cellular organisms;Eukaryota;Opisthokonta;Metazoa;Eumetazoa;Bilateria;Protostomia;Lophotrochozoa;Annelida;Polychaeta;Scolecida;Spionida;Spionidae;Spiophanes;Spiophanes norrisi;
22	0	0	0	0	0	1	0	0	0	1	1	root;cellular organisms;Eukaryota;Opisthokonta;Metazoa;Eumetazoa;Bilateria;Protostomia;Ecdysozoa;Panarthropoda;Arthropoda;Mandibulata;Pancrustacea;Crustacea;Maxillopoda;Copepoda;Neocopepoda;Gymnoplea;Calanoida;
23	0	0	0	0	1	0	0	0	0	1	1	root;cellular organisms;Eukaryota;Opisthokonta;Metazoa;Eumetazoa;Bilateria;Protostomia;Ecdysozoa;Panarthropoda;Arthropoda;Mandibulata;Pancrustacea;Crustacea;Maxillopoda;Copepoda;Neocopepoda;Podoplea;Cyclopoida;Oithonidae;
25	0	0	0	0	0	0	1	0	0	1	1	root;cellular organisms;Eukaryota;Opisthokonta;Metazoa;Eumetazoa;Bilateria;Protostomia;Lophotrochozoa;Mollusca;Gastropoda;Heterobranchia;Euthyneura <gastropod>;Euopisthobranchia;Cephalaspidea;Bulloidea;Haminoeidae;Haminoea;
41	0	0	0	0	0	0	1	0	0	1	1	root;cellular organisms;Eukaryota;Opisthokonta;Metazoa;Eumetazoa;Bilateria;Protostomia;Ecdysozoa;Panarthropoda;Arthropoda;Mandibulata;Pancrustacea;Crustacea;Maxillopoda;Copepoda;Neocopepoda;Gymnoplea;Calanoida;Paracalanidae;Bestiolina;Bestiolina similis;
42	0	0	0	0	0	1	0	0	0	1	1	root;cellular organisms;Eukaryota;Opisthokonta;Metazoa;Eumetazoa;Bilateria;Protostomia;Ecdysozoa;Panarthropoda;Arthropoda;Mandibulata;Pancrustacea;Crustacea;Maxillopoda;Copepoda;Neocopepoda;Podoplea;Cyclopoida;Oithonidae;Oithona;
45	0	0	0	0	0	0	0	1	0	1	1	root;cellular organisms;Eukaryota;Opisthokonta;Metazoa;Eumetazoa;Bilateria;Protostomia;
48	0	0	0	0	1	0	0	0	0	1	1	root;cellular organisms;Eukaryota;Opisthokonta;Metazoa;Eumetazoa;Bilateria;Protostomia;Ecdysozoa;Panarthropoda;Arthropoda;Mandibulata;Pancrustacea;Crustacea;Maxillopoda;Copepoda;Neocopepoda;Gymnoplea;Calanoida;Calocalanidae;Calocalanus;
55	0	0	0	0	1	0	0	0	0	1	1	root;cellular organisms;
56	0	0	0	0	0	0	1	0	0	1	1	root;cellular organisms;Eukaryota;
65	0	0	0	0	0	0	1	0	0	1	1	root;cellular organisms;Eukaryota;Alveolata;Dinophyceae;
74	0	0	0	0	1	0	0	0	0	1	1	root;cellular organisms;Eukaryota;Stramenopiles;Raphidophyceae;Chattonellales;Chattonellaceae;Chattonella;Chattonella subsalsa;
77	0	0	0	0	0	0	1	0	0	1	1	root;cellular organisms;Eukaryota;Rhodophyta;Florideophyceae;Ceramiales;Rhodomelaceae;Herposiphonia;
78	0	0	1	0	0	0	0	0	0	1	1	root;cellular organisms;Eukaryota;Opisthokonta;Metazoa;Eumetazoa;Bilateria;Protostomia;Lophotrochozoa;Mollusca;Gastropoda;Caenogastropoda;Hypsogastropoda;
80	0	0	0	0	0	1	0	0	0	1	1	root;cellular organisms;Eukaryota;Opisthokonta;Metazoa;Eumetazoa;Bilateria;Protostomia;Ecdysozoa;Panarthropoda;Arthropoda;Mandibulata;Pancrustacea;Crustacea;Maxillopoda;Thecostraca;Cirripedia;Thoracica;Sessilia;
90	0	1	0	0	0	0	0	0	0	1	1	root;cellular organisms;Eukaryota;Opisthokonta;Metazoa;Eumetazoa;Bilateria;Protostomia;
106	0	0	0	0	0	1	0	0	0	1	1	root;cellular organisms;Eukaryota;Opisthokonta;Metazoa;Eumetazoa;Bilateria;Protostomia;Ecdysozoa;Panarthropoda;Arthropoda;Mandibulata;Pancrustacea;Crustacea;Maxillopoda;Copepoda;Neocopepoda;Gymnoplea;Calanoida;Clausocalanidae;Clausocalanus;Clausocalanus furcatus;
119	0	1	0	0	0	0	0	0	0	1	1	root;cellular organisms;Eukaryota;Alveolata;Dinophyceae;Suessiales;Suessiaceae;Protodinium;Protodinium simplex;
129	0	0	0	0	0	1	0	0	0	1	1	root;cellular organisms;Eukaryota;Opisthokonta;Metazoa;Eumetazoa;Bilateria;Protostomia;Ecdysozoa;Panarthropoda;Arthropoda;Mandibulata;Pancrustacea;
132	0	1	0	0	0	0	0	0	0	1	1	root;cellular organisms;Eukaryota;Opisthokonta;Metazoa;Eumetazoa;Bilateria;Deuterostomia;Chaetognatha;environmental samples <Chaetognatha>;Chaetognatha environmental sample;
144	0	0	0	0	1	0	0	0	0	1	1	root;cellular organisms;Eukaryota;Opisthokonta;Metazoa;Eumetazoa;Bilateria;Protostomia;Ecdysozoa;Nematoda;Chromadorea;Rhabditida;Rhabditoidea;Diploscapteridae;Diploscapter;Diploscapter coronatus;
161	0	0	0	0	0	0	0	1	0	1	1	root;cellular organisms;Eukaryota;
163	0	0	0	0	0	0	0	0	1	1	1	root;cellular organisms;Eukaryota;Rhodophyta;Florideophyceae;Ceramiales;
168	0	0	0	0	0	1	0	0	0	1	1	root;cellular organisms;Eukaryota;	Cnidaria;Hydrozoa;85.11
186	0	0	0	0	0	1	0	0	0	1	1	root;cellular organisms;Eukaryota;Stramenopiles;Bacillariophyta;Coscinodiscophyceae;
206	0	0	0	1	0	0	0	0	0	1	1	root;cellular organisms;Eukaryota;	Arthropoda;81.23
209	1	0	0	0	0	0	0	0	0	1	1	root;cellular organisms;Eukaryota;Opisthokonta;Metazoa;Eumetazoa;Bilateria;Protostomia;
214	0	0	1	0	0	0	0	0	0	1	1	root;cellular organisms;Eukaryota;
218	0	0	0	1	0	0	0	0	0	1	1	root;cellular organisms;Eukaryota;
226	0	0	0	0	1	0	0	0	0	1	1	root;cellular organisms;Eukaryota;Alveolata;Dinophyceae;
230	0	0	0	0	0	1	0	0	0	1	1	root;cellular organisms;Eukaryota;Rhodophyta;Florideophyceae;
236	0	0	0	0	1	0	0	0	0	1	1	root;cellular organisms;Eukaryota;	Cnidaria;84.14
255	0	0	0	1	0	0	0	0	0	1	1	root;cellular organisms;Eukaryota;Alveolata;Dinophyceae;
263	0	1	0	0	0	0	0	0	0	1	1	root;cellular organisms;Eukaryota;	Ochrophyta;75.73
281	0	0	0	0	0	0	0	1	0	1	1	root;cellular organisms;Eukaryota;Alveolata;Dinophyceae;
297	0	0	0	0	0	1	0	0	0	1	1	root;cellular organisms;Eukaryota;Opisthokonta;Metazoa;Eumetazoa;Bilateria;Deuterostomia;Echinodermata;Eleutherozoa;Echinozoa;Echinoidea;Euechinoidea;Echinacea;Temnopleuroida;Toxopneustidae;Toxopneustes;Toxopneustes roseus;
305	0	0	0	0	0	1	0	0	0	1	1	root;cellular organisms;Eukaryota;Opisthokonta;Fungi;Dikarya;Ascomycota;saccharomyceta;Pezizomycotina;leotiomyceta;
362	1	0	0	0	0	0	0	0	0	1	1	root;cellular organisms;Eukaryota;Opisthokonta;Metazoa;Eumetazoa;Bilateria;Protostomia;Ecdysozoa;Panarthropoda;Arthropoda;Mandibulata;Pancrustacea;
366	0	0	0	0	0	0	1	0	0	1	1	root;cellular organisms;Eukaryota;Opisthokonta;Metazoa;Eumetazoa;Bilateria;Deuterostomia;Chaetognatha;environmental samples <Chaetognatha>;Chaetognatha environmental sample;
421	0	0	0	0	0	0	0	1	0	1	1	root;cellular organisms;Eukaryota;Rhodophyta;Florideophyceae;Hapalidiales;Hapalidiaceae;Melobesioideae;Phymatolithon;Phymatolithon sp. 2CPVP;
456	0	0	0	0	0	1	0	0	0	1	1	root;cellular organisms;Eukaryota;Alveolata;Dinophyceae;
506	0	0	0	0	1	0	0	0	0	1	1	root;cellular organisms;Eukaryota;Stramenopiles;Bacillariophyta;Coscinodiscophyceae;Thalassiosirophycidae;Thalassiosirales;Skeletonemataceae;Skeletonema;
522	0	0	0	0	0	0	0	1	0	1	1	root;cellular organisms;Eukaryota;Opisthokonta;Metazoa;Eumetazoa;Cnidaria;Scyphozoa;Rhizostomeae;Cassiopeidae;Cassiopea;Cassiopea andromeda;
536	0	0	0	0	0	0	0	0	1	1	1	root;cellular organisms;Eukaryota;Opisthokonta;
564	0	1	0	0	0	0	0	0	0	1	1	root;cellular organisms;Eukaryota;Opisthokonta;Metazoa;Eumetazoa;Bilateria;Protostomia;Lophotrochozoa;Mollusca;Gastropoda;Heterobranchia;Euthyneura <gastropod>;Euopisthobranchia;Aplysiomorpha;Aplysioidea;Aplysiidae;Petalifera;Petalifera petalifera;
568	0	0	0	0	0	0	1	0	0	1	1	root;cellular organisms;Eukaryota;Stramenopiles;Bacillariophyta;Bacillariophyceae;Bacillariophycidae;Naviculales;Pinnulariaceae;Pinnularia;
590	0	0	0	0	0	0	0	0	1	1	1	root;cellular organisms;Eukaryota;Opisthokonta;Metazoa;Eumetazoa;Bilateria;Protostomia;Lophotrochozoa;Mollusca;Gastropoda;Heterobranchia;Euthyneura <gastropod>;Euopisthobranchia;Pteropoda;Thecosomata;Euthecosomata;Limacinoidea;Creseidae;Creseis;
591	0	0	0	0	0	0	0	1	0	1	1	root;cellular organisms;Eukaryota;Rhodophyta;Florideophyceae;Ceramiales;Ceramiaceae;Spyridia;
604	0	0	0	1	0	0	0	0	0	1	1	root;cellular organisms;Eukaryota;Opisthokonta;Metazoa;Eumetazoa;Bilateria;
611	0	0	0	0	0	1	0	0	0	1	1	root;cellular organisms;Eukaryota;Alveolata;Dinophyceae;Gymnodiniales;Gymnodiniaceae;
635	0	0	0	0	0	1	0	0	0	1	1	root;cellular organisms;Eukaryota;Stramenopiles;Bacillariophyta;Coscinodiscophyceae;Chaetocerotophycidae;Chaetocerotales;Chaetocerotaceae;Chaetoceros;Chaetoceros socialis;
710	0	0	0	0	0	0	0	0	1	1	1	root;cellular organisms;Eukaryota;Opisthokonta;Metazoa;Eumetazoa;Bilateria;Protostomia;Ecdysozoa;Panarthropoda;Arthropoda;
729	0	0	0	0	1	0	0	0	0	1	1	root;cellular organisms;Eukaryota;Opisthokonta;Metazoa;Eumetazoa;Bilateria;
912	0	0	0	1	0	0	0	0	0	1	1	root;cellular organisms;Eukaryota;Alveolata;Dinophyceae;Gymnodiniales;Gymnodiniaceae;Akashiwo;
920	1	0	0	0	0	0	0	0	0	1	1	root;cellular organisms;Eukaryota;Alveolata;Dinophyceae;
928	0	0	0	0	0	0	1	0	0	1	1	root;cellular organisms;Eukaryota;	Arthropoda;Copepoda;85.11
997	0	0	0	1	0	0	0	0	0	1	1	root;cellular organisms;Eukaryota;	Arthropoda;Copepoda;87.7
1140	0	0	0	0	0	1	0	0	0	1	1	root;cellular organisms;Eukaryota;	Heterokontophyta;83.15
1227	0	1	0	0	0	0	0	0	0	1	1	root;cellular organisms;Eukaryota;Rhodophyta;Florideophyceae;Gigartinales;Peyssonneliaceae;Ramicrusta;
1259	1	0	0	0	0	0	0	0	0	1	1	root;cellular organisms;Eukaryota;	Annelida;81.72
1373	0	0	0	0	0	0	0	0	1	1	1	root;cellular organisms;Eukaryota;Stramenopiles;Bacillariophyta;Coscinodiscophyceae;Rhizosoleniophycidae;Rhizosoleniales;Rhizosoleniaceae;Guinardia;Guinardia striata;
1460	0	0	0	0	0	0	1	0	0	1	1	root;cellular organisms;Eukaryota;Opisthokonta;Metazoa;Eumetazoa;Cnidaria;Anthozoa;Hexacorallia;Scleractinia;Fungiina;Siderastreidae;Siderastrea;
1478	0	0	0	0	0	0	0	1	0	1	1	root;cellular organisms;Eukaryota;Opisthokonta;Metazoa;Eumetazoa;Cnidaria;Hydrozoa;Hydroidolina;Anthoathecata;Capitata;Zancleidae;Zanclea;
1555	0	0	0	0	1	0	0	0	0	1	1	root;cellular organisms;Eukaryota;Alveolata;Dinophyceae;
1566	0	1	0	0	0	0	0	0	0	1	1	root;cellular organisms;Eukaryota;Stramenopiles;PX clade;Phaeophyceae;
1657	0	0	0	1	0	0	0	0	0	1	1	root;cellular organisms;Eukaryota;Stramenopiles;Bacillariophyta;Bacillariophyceae;Bacillariophycidae;Bacillariales;Bacillariaceae;Pseudo-nitzschia;
1659	0	0	0	0	0	1	0	0	0	1	1	root;cellular organisms;Eukaryota;Opisthokonta;Metazoa;Eumetazoa;Cnidaria;Anthozoa;Hexacorallia;Antipatharia;Antipathidae;
1660	1	0	0	0	0	0	0	0	0	1	1	root;cellular organisms;Eukaryota;Opisthokonta;Metazoa;Eumetazoa;Bilateria;Protostomia;Ecdysozoa;Panarthropoda;Arthropoda;Mandibulata;Pancrustacea;Crustacea;Maxillopoda;Copepoda;Neocopepoda;Podoplea;Cyclopoida;Oithonidae;Oithona;Oithona plumifera;
1772	0	0	0	0	1	0	0	0	0	1	1	root;cellular organisms;	Mollusca;Gastropoda;85.54
1799	0	0	0	0	0	0	0	0	1	1	1	root;cellular organisms;Eukaryota;Stramenopiles;Bacillariophyta;Bacillariophyceae;Bacillariophycidae;
1818	0	0	0	0	0	1	0	0	0	1	1	root;cellular organisms;Eukaryota;Opisthokonta;Metazoa;Eumetazoa;Bilateria;Protostomia;Ecdysozoa;Panarthropoda;Arthropoda;Mandibulata;Pancrustacea;Crustacea;Maxillopoda;Copepoda;Neocopepoda;Gymnoplea;Calanoida;Clausocalanidae;Clausocalanus;Clausocalanus furcatus;
1973	0	0	1	0	0	0	0	0	0	1	1	root;cellular organisms;Eukaryota;Rhodophyta;Florideophyceae;Gigartinales;Nizymeniaceae;Nizymenia;Nizymenia australis;
2135	0	0	0	0	1	0	0	0	0	1	1	root;cellular organisms;Eukaryota;Opisthokonta;Metazoa;Eumetazoa;Bilateria;Protostomia;Ecdysozoa;Panarthropoda;Arthropoda;Mandibulata;Pancrustacea;Crustacea;Malacostraca;Eumalacostraca;Eucarida;Euphausiacea;Euphausiidae;Euphausia;Euphausia sibogae;
2142	0	0	0	1	0	0	0	0	0	1	1	root;cellular organisms;Eukaryota;Stramenopiles;Bacillariophyta;Mediophyceae;
2254	0	0	0	0	0	1	0	0	0	1	1	root;cellular organisms;Eukaryota;Stramenopiles;Bacillariophyta;Coscinodiscophyceae;Thalassiosirophycidae;Thalassiosirales;Stephanodiscaceae;Cyclotella;Cyclotella sp. MBTD-CMFRI-S052;
2281	0	0	0	1	0	0	0	0	0	1	1	root;cellular organisms;Eukaryota;Stramenopiles;Oomycetes;
2679	0	0	0	0	0	0	0	1	0	1	1	root;cellular organisms;Eukaryota;Opisthokonta;Metazoa;Eumetazoa;
2770	0	0	1	0	0	0	0	0	0	1	1	root;cellular organisms;Eukaryota;Opisthokonta;Metazoa;Eumetazoa;Bilateria;Protostomia;Ecdysozoa;Panarthropoda;Arthropoda;
3308	0	0	0	0	0	1	0	0	0	1	1	root;cellular organisms;Eukaryota;Opisthokonta;Metazoa;Eumetazoa;Bilateria;Protostomia;Ecdysozoa;Panarthropoda;Arthropoda;Mandibulata;Pancrustacea;
3331	0	0	0	0	0	0	1	0	0	1	1	root;cellular organisms;Eukaryota;Stramenopiles;Bacillariophyta;
3364	0	1	0	0	0	0	0	0	0	1	1	root;cellular organisms;Eukaryota;Stramenopiles;
3380	0	0	0	0	0	0	0	0	1	1	1	root;cellular organisms;Eukaryota;Amoebozoa;Discosea;Longamoebia;Centramoebida;Acanthamoebidae;Acanthamoeba;Acanthamoeba comandoni;
3417	0	0	0	0	0	1	0	0	0	1	1	root;cellular organisms;Eukaryota;Stramenopiles;PX clade;Phaeophyceae;
3459	0	0	0	0	0	0	0	0	1	1	1	root;cellular organisms;Eukaryota;Opisthokonta;Metazoa;Eumetazoa;Cnidaria;
3466	0	0	0	0	0	0	0	0	1	1	1	root;cellular organisms;Eukaryota;Rhodophyta;Florideophyceae;
3626	1	0	0	0	0	0	0	0	0	1	1	root;cellular organisms;Eukaryota;Opisthokonta;Metazoa;Eumetazoa;Bilateria;Protostomia;Ecdysozoa;Panarthropoda;Arthropoda;Mandibulata;Pancrustacea;Crustacea;Maxillopoda;Copepoda;Neocopepoda;Gymnoplea;Calanoida;Acartiidae;Acartia;Acartia californiensis;
3692	0	0	0	0	1	0	0	0	0	1	1	root;cellular organisms;Eukaryota;	Arthropoda;79.66
4051	0	0	0	1	0	0	0	0	0	1	1	root;cellular organisms;Eukaryota;Opisthokonta;Metazoa;
4911	0	0	0	1	0	0	0	0	0	1	1	root;cellular organisms;Eukaryota;unclassified eukaryotes;Telonemida;
4968	0	0	0	0	0	0	0	1	0	1	1	root;cellular organisms;Eukaryota;Stramenopiles;Bacillariophyta;Coscinodiscophyceae;
5035	0	0	0	0	0	0	1	0	0	1	1	root;cellular organisms;Eukaryota;Opisthokonta;Metazoa;Eumetazoa;Cnidaria;Anthozoa;Hexacorallia;Scleractinia;Fungiina;Siderastreidae;Siderastrea;
5153	0	0	0	0	0	0	0	1	0	1	1	root;cellular organisms;Eukaryota;Haptophyceae;Prymnesiales;Chrysochromulinaceae;Chrysochromulina;Chrysochromulina sp. NIES-1333;
5242	0	0	0	0	0	0	0	1	0	1	1	root;cellular organisms;Eukaryota;Stramenopiles;Raphidophyceae;Chattonellales;Chattonellaceae;Chattonella;
5287	0	1	0	0	0	0	0	0	0	1	1	root;cellular organisms;Eukaryota;Opisthokonta;Metazoa;Eumetazoa;Bilateria;Deuterostomia;Chaetognatha;environmental samples <Chaetognatha>;Chaetognatha environmental sample;
5357	0	1	0	0	0	0	0	0	0	1	1	root;cellular organisms;Eukaryota;Stramenopiles;Bacillariophyta;Mediophyceae;Lithodesmiophycidae;Lithodesmiales;Lithodesmiaceae;
5688	0	0	0	0	0	0	1	0	0	1	1	root;cellular organisms;Eukaryota;	Bacillariophyta;75.76
5732	0	0	0	0	1	0	0	0	0	1	1	root;cellular organisms;Eukaryota;Alveolata;Dinophyceae;
5795	0	1	0	0	0	0	0	0	0	1	1	root;cellular organisms;Eukaryota;Opisthokonta;Metazoa;Eumetazoa;Bilateria;Protostomia;
6225	0	0	0	1	0	0	0	0	0	1	1	root;cellular organisms;Eukaryota;Rhodophyta;
6994	0	0	0	0	0	0	0	0	1	1	1	root;cellular organisms;Eukaryota;Opisthokonta;Metazoa;Eumetazoa;
7485	0	0	0	0	0	0	1	0	0	1	1	root;cellular organisms;Eukaryota;
8079	0	1	0	0	0	0	0	0	0	1	1	root;cellular organisms;Eukaryota;	Mollusca;81.78
8470	1	0	0	0	0	0	0	0	0	1	1	root;cellular organisms;Eukaryota;Opisthokonta;Metazoa;Eumetazoa;Bilateria;Protostomia;Ecdysozoa;Panarthropoda;Arthropoda;Mandibulata;Pancrustacea;Crustacea;Maxillopoda;Copepoda;Neocopepoda;Podoplea;Cyclopoida;Oithonidae;
8635	0	0	0	1	0	0	0	0	0	1	1	root;cellular organisms;Eukaryota;Rhodophyta;Florideophyceae;Gigartinales;Peyssonneliaceae;Ramicrusta;
10991	0	0	0	0	1	0	0	0	0	1	1	root;cellular organisms;Eukaryota;	Ochrophyta;82.68
									Total	1586	188

## Sheet: Table S3
TABLE S3. TAXONOMIC ASSIGNEMENTS OF TOTAL OTUs INCLUDED IN THE ANALYSES, INCLUDING READS PER SITE AND CORRESPONDING GENETIC SEQUENCES
#	OTU ID	Taxonomic_Assignement	sn1	sn2	sn3	sn4	sc1	sc2	sc3	sc4	sc5	sc6	sc7	sc8	sc9	sc10	sc11	ss1	dn1	dn2	dn3	dn4	dc1	dc2	dc3	dc4	dc5	dc6	dc7	dc8	dc9	dc10	dc11	ds1	Sequence
1	7	NCBI;cellular organisms;Eukaryota;Opisthokonta;Metazoa;Eumetazoa;Bilateria;Protostomia;Ecdysozoa;Panarthropoda;Arthropoda;Mandibulata;Pancrustacea;Crustacea;Multicrustacea;Malacostraca;Eumalacostraca;Eucarida;Euphausiacea;Euphausiidae;Euphausia;Euphausia distinguenda;	0	0	0	0	7	4	27	9	18	39101	1	2	10	4	0	0	0	0	0	0	3	0	1	0	9	631	3	0	0	0	0	0	TTTAGCAGGAGGAATTGCTCATGCTGGGGCTTCAGTAGACATGGGTATTTTTTCACTCCACATTGCTGGGGCTTCGTCCATTCTAGGAGCGGTTAACTTTATTACAACTGTTATTAATATGCGATCTGCAGGTATAACTATAGACCGAATTCCATTATTTGTTTGGTCAGTTTTCATTACTGCAATTTTACTTCTTCTTTCATTACCAGTGCTAGCAGGCGCTATTACGATGCTTTTAACTGACCGTAATCTTAATACATCTTTCTTCGACCCTGCCGGAGGAGGGGACCCTATTCTATATCAGCATTTATTT
2	9	NCBI;cellular organisms;Eukaryota;Amoebozoa;Discosea;Flabellinia;Vannellidae;Vannella;	3	4	12	4	14	0	0	41	0	0	8	0	0	0	0	34703	15	0	0	0	0	31	14	0	0	0	0	0	0	0	0	0	TTTATCTAGTATTGAAAATCATTCAGGAGGTGCTGTTGATTTAGCTATTTTTAGTTTACATTTATCAGGTGCCTCATCATTGTTGGGGGCTATTAATTTTATTACAACAATTATTAATATGAGAACACCTCAAATGACTTGGAATAGATTGCCTTTATTTGTTTGGGCAATTTTTATTACTGCTTTTTTATTATTACTTTCATTGCCAGTTTTAGCTGGTGGTATTACAATGTTATTAACAGATCGTAACTTTAATACTACTTTTTTTGATCCATTGGGAGGAGGTGATCCTATTTTATTTCAACATCTTTTT
3	12	NCBI;cellular organisms;Eukaryota;Opisthokonta;Metazoa;Eumetazoa;Bilateria;Protostomia;Ecdysozoa;Panarthropoda;Arthropoda;	2	1	6	2	0	3	0	0	1	0	13980	0	0	0	0	8	0	5	0	0	0	0	0	0	0	0	0	0	0	2	0	0	TTTATCAGGTAATTTGGCCCACACAAGAGCTTCAGTAGACTTAACAATCTTTTCTTTACATTTAGCTGGTGCTTCTTCTATTTTAGGGGCGATCAATTTTATTACAACAATTATAAATATACGTCAGGTTGGTATGTCATTGACAAAAATCCCCTTATTTGTTTGGTCAGTAGCTGTTACAGCAATTCTTCTTCTTTTATCTTTACCAGTCTTAGCTGGAGCTATTACTATACTTTTAACGGACCGAAATTTTAATACCACATTTTTTGATCCATTAGGAGGGGGTGATCCAATTTTATATCAACATTTATTT
4	15	NCBI;cellular organisms;Eukaryota;Opisthokonta;Metazoa;Eumetazoa;Bilateria;Protostomia;Spiralia;Lophotrochozoa;Mollusca;Gastropoda;Heterobranchia;Euthyneura <gastropods>;Tectipleura;Aplysiida;Aplysioidea;Aplysiidae;Dolabella;Dolabella auricularia;	0	1	2	1	9	4	27	5	7	6	5684	6793	7	2	5	1	0	2	0	0	0	0	0	0	0	1	0	0	0	0	0	0	TTTATCTGGGCCAATTGCCCACGGTGGGACATCAGTTGATCTGGCTATTTTTTCTCTTCATTTAGCGGGAATGTCTTCAATTTTAGGGGCTATTAATTTTATTACCACGATTTTTAATATGCGGTCTCCTGGAATTACTTTCGAACGATTAAGTCTTTTTGTTTGGTCTGTTTTAGTGACGGCCTTTCTTTTATTATTATCTTTACCTGTATTGGCTGGGGCTATTACTATGTTATTAACTGATCGAAATTTTAATACTAGTTTCTTCGATCCTGCGGGAGGGGGAGATCCTATTTTATATCAACATTTGTTC
5	18	NCBI;cellular organisms;Eukaryota;Opisthokonta;Metazoa;Eumetazoa;Bilateria;Protostomia;Ecdysozoa;Panarthropoda;Arthropoda;Mandibulata;Pancrustacea;Crustacea;Multicrustacea;Hexanauplia;Copepoda;Neocopepoda;Gymnoplea;Calanoida;Calanidae;Ctenocalanus;Ctenocalanus vanus;	3	3	2	0	2	0	0	4	0	0	0	1	0	0	0	2	5489	3	4374	24	0	74	0	29	0	0	1	0	0	0	0	8	TTTATCGAGAAATATTGCACATGCAGGAGGTTCTGTAGATTTTGCAATTTTTTCATTACATTTAGCAGGGGTAAGATCTATTTTAGGGGCTGTAAATTTTATTAGAACTTTAGGTAATTTACGTGTATTTGGTATACTTTTAGATCGAATTCCTCTTTTTGCTTGATCGGTGTTAGTCACAGCTATTTTATTATTATTATCACTTCCAGTTTTAGCTGGAGCTATTACAATGCTTCTTACAGATCGTAATCTAAATACTTCTTTCTATGATGTAGGAGGAGGTGGAGATCCAATTTTATATCAGCATTTGTTT
6	20	NCBI;cellular organisms;Eukaryota;Sar;Stramenopiles;Ochrophyta;PX clade;Phaeophyceae;	529	5	172	475	5054	10	329	916	8063	1151	2833	102	60	466	102	46	170	0	18	11	140	31	24	4	3	1393	31	1	1	3	2	0	TTTAAGTAGTGTACAAGCACATTCTGGTCCTTCGGTGGATTTAGCTATTTTTAGTCTACACCTTTCAGGGGCGTCGTCAATTTTAGGAGCGATTAATTTTATCACTACTATTTTTAACATGCGAGCACCTGGTATGACTATGCACCGTCTGCCGTTATTTGTGTGGGCCATTCTAATTACCGCATTCTTATTGTTATTATCGTTACCTGTTTTAGCTGGTGCAATTACCATGTTATTAACTGACCGTAACTTTAATACTACTTTCTTCGACCCAGCCGGTGGTGGAGACCCAGTGCTTTACCAACACTTATTC
7	24	NCBI;cellular organisms;Eukaryota;Viridiplantae;Chlorophyta;Chloropicophyceae;Chloropicales;Chloropicaceae;Chloroparvula;unclassified Chloroparvula;	93	1	497	4169	901	0	22	118	1076	28	526	31	4	4	78	12	65	1	618	7	91	127	48	32	1	56	13	10	0	0	1	0	ACTAAGTAGTATTCAAGCTCACTCAGGTGGTTCTGTAGATCTTGCCATTTTTAGTCTTCACGTAAGTGGTGCTAGTAGTATTTTGGGTGCTATTAACTTTATTACCACTATTTTTAATATGCGTGGACCCGGTATGACAATGCACCGCCTACCTTTGTTTGTATGGGCAGTTTTGATTACAGCTTTCTTGCTACTTCTATCTCTACCTGTACTTGCTGGTGCAATTACCATGCTTCTAACAGATCGTAACTTCAATACCAGTTTCTTTGATCCTGCTGGTGGAGGAGACCCTATTCTATACCAACACCTATTT
8	26	NCBI;cellular organisms;Eukaryota;Opisthokonta;Metazoa;Eumetazoa;Bilateria;Protostomia;Ecdysozoa;Panarthropoda;Arthropoda;Mandibulata;Pancrustacea;Crustacea;Multicrustacea;Hexanauplia;Copepoda;Neocopepoda;Podoplea;Poecilostomatoida;Oncaeidae;Oncaea;	69	2	72	12	6302	8	6	7	3	4	0	4	21	1	3	5	3429	0	1	18	5	198	0	91	0	1	0	0	0	0	0	1	TTTAAGGAGAAACGTAGCGCATTCAGGAGCTTCTGTTGATTTTGCAATTTTTGCTCTTCATCTGGCCGGGGTTTCATCATTGTTAGGTGCAGTAAATTTTATTACCACTTTCTCTAATTTACGGGGGCTAGGTATACTTTTAGAGCGAGTTCCCCTATTTGGATGGGCAGTATTAATTACCACAATTCTACTTTTATTATCTTTGCCTGTATTAGCTGGAGCAATTACCATACTTTTAACAGATCGTAACTTAAATACGTCATTTTACGATTCTAATGGTGGTGGTGACCCTATTTTGTACCAACATCTATTT
9	28	NCBI;cellular organisms;Eukaryota;Viridiplantae;Chlorophyta;Mamiellophyceae;Mamiellales;Bathycoccaceae;Bathycoccus;Bathycoccus prasinos;	698	25	112	150	2	0	0	4	0	2	10	1	89	0	0	5	2520	0	16	0	0	0	0	1	10	2	0	0	35	1	0	1	TCTAAGTCACATTACGAGCCACTCTGGTGGTGCAGTAGATTTAGCTATTTTCAGTTTACATTTATCTGGAGCAAGTAGTATTTTAGGTGCGATTAACTTTATTACCACTATTTTTAACATGCGTGGCCCTGGTCTTGGGTTCCACCGTTTACCTTTATTTGTGTGGTCAGTTCTGATTACTGCTTTTTTACTTCTTCTTTCTTTACCAGTATTAGCTGGAGCGATTACGATGCTGTTAACTGATCGTAACTTTAACACCTCGTTTTTTGATCCTGCTGGGGGAGGGGATCCAATTCTTTTCCAACATCTTTTT
10	33	NCBI;cellular organisms;Eukaryota;Opisthokonta;Metazoa;Eumetazoa;Bilateria;Protostomia;Ecdysozoa;Panarthropoda;Arthropoda;Mandibulata;Pancrustacea;	0	0	0	0	0	0	0	6	0	0	0	0	0	0	0	2	0	0	0	0	8	0	8213	0	3	0	0	3	2	3	1	0	TTTGGCGAGAAATATTGCCCATGCGGGAAGTTCAGTTGATTTTGCAATTTTTTCCCTTCATTTAGCTGGTATTTCTTCTATTCTGGGAGCAATTAATTTTATTAGGACTTTGGCTAATTTGCGCGTCTTTGGAATACTATTGGAGCAGATACCTCTTTTTGCCTGGGCTGTCTTAGTGACTGTAATTCTTTTACTGCTCTCATTACCTGTGTTGGCAGGAGCTATTACGATACTCCTAACAGATCGAAACTTAAATACAACTTTTTATGATGCGGGCGGAGGTGGAGACCCTATTCTCTATCAGCATCTTTTT
11	37	NCBI;cellular organisms;Eukaryota;Sar;Stramenopiles;Ochrophyta;PX clade;Phaeophyceae;	142	4	52	58	1919	1	163	470	3835	218	1018	26	5	150	57	1	134	0	4	3	55	6	38	2	1	703	14	1	0	2	1	0	TTTAAGTAGTGTACAAGCACATTCTGGTCCTTCGGTGGATTTAGCTATTTTTAGTCTACACCTTTCAGGAGCTTCGTCAATTTTAGGAGCGATTAATTTTATCACTACTATCTTCAATATGCGAGCGCCTGGTATGACTATGCACCGTCTGCCGTTATTTGTGTGGGCCATTCTAATTACCGCATTCTTACTGTTATTATCGTTACCTGTTCTAGCTGGTGCAATTACCATGTTATTAACTGATCGTAACTTTAATACTACCTTCTTTGACCCTGCCGGTGGTGGAGATCCTGTACTTTACCAACATTTATTT
12	40	NCBI;cellular organisms;Eukaryota;Sar;Alveolata;Dinophyceae;	357	35	8066	2341	107	27	759	63	367	900	5448	148	28	338	75	12	467	0	798	41	402	21	0	84	2	217	150	10	0	1	0	0	ATTAAGCACTTCTTTCATGAGCTTATCACCTTCAAGTACAGGAAATCTTATCTTTGGATTATTAATCTCAGGTATATCCTCATGTCTCACATCTCTTAATTTTTGGACAACAATTCTAAATTTGAGATCTTATTATCTGACATTAAAGACTATGCCATTATTCCTTTGGGCTCTCTTGATTACTGGAGGAATGCTTTTATTAACATTACCAATCTTGTCTGGAGCTCTTCTAATGGTCTTGGCTGATCTTCATTCTAATACACTTTTCTTTGATCCAATCTTTGGAGGAGATCCTATATTCTATCAACACTTATTT
13	44	NCBI;cellular organisms;Eukaryota;Opisthokonta;Metazoa;Eumetazoa;Bilateria;Protostomia;Ecdysozoa;Panarthropoda;Arthropoda;Mandibulata;Pancrustacea;Crustacea;Multicrustacea;Hexanauplia;Copepoda;Neocopepoda;Gymnoplea;Calanoida;	671	93	27	46	5	3	434	70	1	155	0	937	3	1	546	1	5	0	26	1	5	0	3	11	0	1280	0	4	4	5	2	0	TTTATCTAGAAATATTGCTCATGCTGGAAGGTCTGTAGATTTTGCTATTTTTTCTTTACATTTAGCGGGAGTCAGATCTATTTTAGGAGCTGTAAATTTTATTAGAACATTAGGAAATTTACGAGTATTTGGAATATTATTAGATCGAATACCATTATTTGCATGAGCAGTTTTAATTACAGCAATCTTATTATTATTATCATTACCAGTATTAGCTGGAGCCATTACTATGTTATTAACAGATCGTAATTTAAATACTTCTTTTTATGATGTAGGAGGAGGAGGAGATCCTATTTTATATCAACATTTATTT
14	50	NCBI;cellular organisms;Eukaryota;Opisthokonta;Metazoa;	28	2	0	0	0	0	0	0	0	0	0	0	0	0	0	0	9	2	5	3	0	3819	0	7	0	0	0	0	0	0	0	4	TCTATCTGCTGCCATAGCTCATTCAGGACCATCTGTAGACATGGCCATATTCTCCCTACACTTGGCTGGGGCAAGTTCTATAATGGGTGCTATTAATTTCATAGTTACTATAGTTAATATGAGAACACCAGGCATGGACTGGTTTAATTTAAATCTATTTGTTTGAGCTGTATTTATAACAGTAATTCTTTTACTACTTTCTTTACCTGTTTTAGCAGGAGCAATTACTATGCTTTTGACAGATAGAAACTTCAACACGACTTTTTTTGATCCCGTTGGTGGAGGAGATCCTATACTATACCAGCACTTATTC
15	51	NCBI;cellular organisms;Eukaryota;Opisthokonta;Metazoa;Eumetazoa;Bilateria;Protostomia;Spiralia;Lophotrochozoa;Mollusca;Gastropoda;Caenogastropoda;Littorinimorpha;Pterotracheoidea;Atlantidae;Atlanta;unclassified Atlanta;Atlanta sp. USNM IZ 1230636;	0	0	0	0	0	0	0	0	0	0	0	0	3	0	0	1	3413	0	1	0	0	1	0	1	0	0	0	0	0	0	0	0	TCTTTCCGGTAACTTAGCTCACGCAGGAGGATCTGTTGACCTAGCTATTTTCTCTCTACATTTGGCTGGAGTTTCGTCTATTTTAGGAGCCGTAAATTTCATTACTACTATTATTAACATGCGATGACGAGGTATGCAGTTCGAGCGATTACCTTTATTTGTTTGATCCGTGAAAATTACTGCAGTTTTGCTTCTTCTTTCTCTACCTGTTCTAGCTGGAGCAATTACTATGCTATTAACAGATCGAAATTTCAACACCGCTTTCTTCGACCCAGCAGGAGGGGGTGATCCAATCCTTTACCAACACTTGTTT
16	53	NCBI;cellular organisms;Eukaryota;Stramenopiles;	757	1	1	1225	11	0	251	45	238	55	162	4	1	79	216	4	716	1	139	12	0	1	39	5	0	91	29	11	0	0	0	0	ATTAAGTAGTGTTCAAGCTCACTCAGGTCCATCAGTGGATTTAGCAATCTTTAGCCTGCATTTATCAGGTGCATCATCAATATTAGGAGCAATAAATTTTATTACAACAATATTTAATATGAGAGCACCTGGAATGACAATGCATAGATTGCCTTTATTTGTATGGGCTGTATTAATTACAGCATTTTTATTATTATTGTCTTTACCTGTGTTAGCAGGAGCAATAACAATGTTGTTAACAGATAGAAATTTTAACACAACATTCTTTGATCCAGCAGGAGGAGGAGATCCAGTGTTATACCAACATCTTTTT
17	57	NCBI;cellular organisms;Eukaryota;Opisthokonta;Metazoa;Eumetazoa;Bilateria;Protostomia;Ecdysozoa;Panarthropoda;Arthropoda;Mandibulata;Pancrustacea;	1	0	0	0	0	0	0	0	0	0	3404	0	0	0	0	2	0	3	0	0	0	0	0	0	0	0	0	0	0	0	0	0	GCTTAGAAGTAATATTGCTCACTCAGGGCCTTCAGTGGACTTTGCAATTTTTTCCTTGCATTTAGCAGGGGTCTCCTCTCTTCTTGGGGCGGTAAATTTCATTAGCACTCTAAGAAATCTTCGAACTTTAGGCATACTCCTTGACCGTATACCTCTTTTTGCTTGAGCTGTGCTAATTACAGCTATTCTCTTGTTGCTTTCTCTTCCGGTATTAGCTGGGGCTATTACCATGCTCTTAACTGACCGGAACTTAAACACTTCTTTTTACGATCCAAGAGGAGGGGGGGACCCAATTTTATACCAACATCTTTTT
18	60	NCBI;cellular organisms;Eukaryota;Sar;Stramenopiles;Ochrophyta;PX clade;	107	0	50	38	0	0	0	3	1	0	0	1	0	0	0	2	3140	0	103	22	0	1	22	11	0	0	23	3	0	0	0	2	TTTGAGTAGTGTTCAAGCCCATTCAGGTCCTTCTGTGGATTTGGCTATTTTTAGCCTTCATTTGTCAGGGGCAGCATCTATCATGGGAGCGATTAATTTCATCACAACAATTATTAATATGCGACCAGGGGGAATGGGAATGCATCGTTTGCCTCTATTTGTATGGGCAGTTTTGCTAACCGCAATTCTATTGTTGCTTTCTCTTCCTGTTTTGGCCGGGGGTATTACTATGTTGTTGACTGACCGAAATTTTAACACTACCTTTTTTGATCCCGCTGGAGGAGGAGACCCGGTTCTTTATCAACACCTATTT
19	61	NCBI;cellular organisms;Eukaryota;Opisthokonta;Metazoa;Eumetazoa;Bilateria;Protostomia;Ecdysozoa;Panarthropoda;Arthropoda;Mandibulata;Pancrustacea;Crustacea;Multicrustacea;Hexanauplia;Copepoda;Neocopepoda;Podoplea;Poecilostomatoida;Sapphirinidae;Copilia;Copilia mirabilis;	0	0	0	0	1	0	100	2	1	2411	902	13	1	0	0	0	0	1	0	0	0	0	13	0	0	0	0	0	0	0	0	0	TCTCTCTAGGAATATTGCTCATGCAGGAAGTTCGGTTGACTTTGCAATCTTTTCACTTCATTTGGCGGGGGTCAGGTCTATTTTAGGGGCTGTAAATTTTATTAGGACGTTGGGGAACCTCCGTGTTTTCGGTATGTTACTAGACCGGATACCTCTATTTGCCTGAGCTGTATTAATCACGGCAGTATTATTACTACTATCACTGCCGGTACTGGCAGGGGCTATCACTATGTTGCTTACTGACCGAAATTTAAACTCTTCCTTTTATGATGCAAGCGGGGGGGGCGACCCCATCCTCTACCAACATTTGTTT
20	63	NCBI;cellular organisms;Eukaryota;Opisthokonta;Metazoa;Eumetazoa;Bilateria;Protostomia;Ecdysozoa;Panarthropoda;Arthropoda;Mandibulata;Pancrustacea;Crustacea;Multicrustacea;Hexanauplia;Copepoda;Neocopepoda;Gymnoplea;Calanoida;Paracalanidae;Paracalanus;	0	0	387	0	668	1	17	1	2	18	2366	288	8	4	33	0	0	0	0	1	3	0	3	1	0	826	1	0	2	1	2	0	ATTATCTAGGAATATTGCCCATGCTGGGAGGTCAGTTGATTTTGCTATTTTTTCATTACATTTAGCAGGAGTGAGTTCAATTCTTGGTGCAGTAAATTTTATTAGGACTTTAGGAAATTTACGAGTATTTGGAATACTATTAGATCGAATACCTTTATTTGCATGAGCTGTTTTAATTACTGCTGTTTTATTACTATTATCTTTACCTGTGTTAGCAGGAGCTATTACTATATTATTAACTGATCGAAATTTAAATACTACATTCTATGATGTTGGTGGTGGTGGAGATCCAATTCTTTATCAGCATTTATTT
21	64	NCBI;cellular organisms;Eukaryota;Opisthokonta;Metazoa;Eumetazoa;Bilateria;Protostomia;Spiralia;Lophotrochozoa;Mollusca;Gastropoda;Heterobranchia;Euthyneura <gastropods>;Nudipleura;Nudibranchia;Cladobranchia;Aeolidioidea;Glaucidae;Glaucus;Glaucus atlanticus;	1	4	2	2	0	0	0	0	0	0	1	0	0	0	0	1	1	0	1029	0	0	0	0	1	0	0	1	0	0	0	3	52	GTTATCAGGAGCTGTAGGGCATGGAGGTTGTTCAGTTGATCTGGCCATTTTCTCACTTCATCTTGCAGGTATGTCTTCACTTTTAGGTGCTATTAATTTTATTACAACCATTTACAATATACGATCGCCCGAGATAACGTTTGATCGGCTAAGGCTTTTCGTATGGTCGGTGCTTGTAACAGCATTTCTTCTTCTCTTGTCTCTTCCTGTGTTGGCTGGGGCAATTACAATGCTGTTAACAGACCGTAATTTCAATACTAGATTCTTCGACCCAGCAGGGGGAGGGGATCCTATCCTATACCAGCATCTGTTC
22	66	NCBI;cellular organisms;Eukaryota;Sar;Stramenopiles;Ochrophyta;Bacillariophyta;Coscinodiscophyceae;	0	14	683	0	0	0	0	0	0	0	0	2	0	0	0	0	91	1	2108	42	0	1	0	2	0	1	10	0	5	0	0	1	TTTATCAAGTGGTACATCACATTCAGGAGGTGCAGTAGATTTAGCTATTTTCAGTTTACACTTATCAGGAGCATCTTCTATTTTAGGTGCAATTAATTTTATATGTACTATTTTTAACATGCGTGTTAAAAGTTTATCGTTTCATAAACTTCCTTTATTTGTATGGGCTGTTTTAATTACAGCATTTTTATTATTGTTATCACTACCTGTTTTAGCTGGAGCAATTACAATGTTATTAACAGATCGAAATTTTAATACTACTTTTTTTGATCCAGCAGGTGGTGGAGACCCTGTATTATATCAACATTTATTC
23	68	NCBI;cellular organisms;Eukaryota;Viridiplantae;Chlorophyta;Mamiellophyceae;Mamiellales;Mamiellaceae;Micromonas;Micromonas pusilla;	120	335	0	4	1	0	0	4	0	0	6	0	0	0	0	3	393	0	2	0	0	0	0	1	0	4	0	1	0	1	0	0	ATTAAGTCATATTACAAGTCACTCTGGAGGTGCAGTAGATTTAGCTATTTTTAGTTTACACGTATCAGGAGCAAGTAGTATTTTAGGCGCAATTAATTTTATTACAACTATTTTTAATATGCGAGGACCTGGGTTACTTCTTCACCGTCTGCCATTATTTGTGTGGAGTGTACTAATTACAGCTTTTTTACTTTTATTATCTCTTCCAGTTTTAGCAGGTGCTATTACAATGCTTTTAACTGATCGTAACTTTTCAACTAGTTTTTTTGATCCAAGTGGCGGTGGTGACCCGATTTTATATCAGCATTTATTC
24	70	NCBI;cellular organisms;Eukaryota;Opisthokonta;Metazoa;Eumetazoa;Bilateria;Protostomia;	1	4244	4	1	0	0	0	0	0	0	3	0	0	0	0	2	246	0	1	0	0	0	0	0	0	0	3	0	0	0	0	0	TTTGTCTAATGGTATTTGCCATTCAGGTCCCTCTGTAGATTTGGCTATTTTTTCTTTACATTTGGCTGGTATTTCTTCTATTTTAGCCTCTATTAATTTTCTAGGTACTTTTCGCTTAGCCGTATCTGGTATTTGAACTTACATACGTGTTTCTCTATTTGTGTGATCTATTGTTGTTACTACTGGTTTGTTACTTTTAGCTTTACCTGTTTTAGCAGGTTGTTTAACAATGTTATTAACTGATCGTAATTTAAATACTACTTTTTTTGATCCTTCAGGAGGAGGAGATCCTGTTTTATATCAAGGATTGTTT
25	76	NCBI;cellular organisms;Eukaryota;Opisthokonta;Metazoa;Eumetazoa;Bilateria;Protostomia;	0	0	0	0	0	0	0	2	0	0	0	0	0	0	0	0	2471	2	0	0	0	1	0	0	0	0	0	0	0	0	0	0	TCTGTCGGTTTATGAGGGTTCTATGGGAGTTGATTTACTTATTTTATCTTTGCATATAGCTGGGGTAAGTTCAGGGGCTGCTTCTGTAAACTATATAGTTACATTTTTAAATTGTCGGGGAAAAATATATAAAGCTGAGCTTTGTCCTCCATTTGTTTGGGCAACAGTTGTTACTAGGTTGTTATTGGCGGTTTCTCTTCCTGTTTTGGCGGGGGGGTTGACTATACTTATTATGGATCGTCACTTTAACTGCAATTTTTTTGACCCTTCGGGAGGAGGAGATCCTGTGTTATTTCAGCATTTATTT
26	81	NCBI;cellular organisms;Eukaryota;Opisthokonta;Metazoa;Eumetazoa;Bilateria;Protostomia;Spiralia;Lophotrochozoa;Annelida;Polychaeta;unclassified Polychaeta;Polychaeta sp. LVSF009;	0	1325	4	0	0	0	0	0	0	0	2	0	19	0	0	7	2	0	1	0	0	443	0	0	0	6	0	0	0	0	0	0	TCTATCTAATGGGATTTGTCATTCTGGGCCTTCTGTTGATTTAGCTATTTTTTCTCTTCATCTGGCGGGTATTTCTTCTATTCTTGCTTCTATTAACTTTCTAGGGACTTTTCGTTTAGCTGTTTCAGGAGTTTGAAATTATATACGGGTGCCTTTGTTTTGTTGATCGATTGTTGTTACTACTGGACTTCTTCTATTAGCTCTTCCTGTTTTAGCTGGTTGTTTAACAATATTATTAACTGATCGTAATATAAATACTACTTTTTTTGACCCCGCGGGAGGTGGCGACCCTGTTCTTTATCAAGGGTTATTT
27	82	NCBI;cellular organisms;Eukaryota;Opisthokonta;Metazoa;Eumetazoa;Cnidaria;Hydrozoa;Hydroidolina;Siphonophorae;Calycophorae;Sphaeronectidae;Sphaeronectes;Sphaeronectes koellikeri;	1	1	4	2	0	0	0	0	0	0	1	0	0	0	0	4	0	0	0	0	11	0	0	1	0	0	0	0	0	0	0	0	ATTATCGAGTGGAATTGCTCATTCGGGACCATCAGTTGATTTTGCTATATTTGCTTTACATTTAGCAGGTGCAGCTTCATTAATGGGGTCTATTAACTTTACTGTTACAATATTATTAAATAGAGCTAATTCTATAAATGTTTGAAGAGCTCCATTATTCATATGAGCAATGCTAGTTACTTCTGGATTATTGATAGGATCGTTACCAGTATTAGCAGGAGCAATAACAATGCTATTAACAGATAGAAATTTTAATACAACCTTTTTTGATCCAACAGGAGGAGGTGACTGTATTTTATTTCAACATTTATTT
28	83	NCBI;cellular organisms;Eukaryota;Opisthokonta;Metazoa;Eumetazoa;Bilateria;Protostomia;Spiralia;Lophotrochozoa;Mollusca;Gastropoda;Heterobranchia;Euthyneura <gastropods>;Tectipleura;Aplysiida;Aplysioidea;Aplysiidae;Stylocheilus;Stylocheilus rickettsi;	0	0	0	0	1	0	2306	2	0	0	3	0	2	1	0	0	0	0	0	0	1	0	0	0	0	0	0	0	0	0	0	0	TCTTTCTGGGCCTATTGCTCATGGAGGAACTTCTGTTGACTTAGCTATTTTTTCTCTTCACCTAGCAGGGATGTCTTCAATTTTAGGGGCGATCAACTTTATTACAACTATTTTTAACATACGTTCTCCTGGAATTTCTTTTGAACGTTTAAGTTTATTTGTTTGATCTGTTTTAGTAACTGCTTTTCTTTTACTTCTTTCTCTTCCTGTACTTGCAGGTGCAATTACTATACTTCTAACAGATCGTAATTTTAATACTAGATTCTTCGATCCAGCCGGAGGAGGGGATCCTATTTTATATCAACACTTGTTC
29	84	NCBI;cellular organisms;Eukaryota;Opisthokonta;Metazoa;Eumetazoa;Bilateria;Xenacoelomorpha;Acoelomorpha;Acoela;	1	2640	2	4	0	0	0	0	0	0	1	0	0	0	0	1	0	0	1	0	0	0	0	0	0	1	0	0	0	0	0	0	TCTTTCAAGCTTAGTAGGACACCAAGGAATGGGTGTAGATTTAGGAATCTTTAGAATACACATTGCGGGTGCCTCTAGAATTGGAGGTTCAATTAACTTCTTATGTACAATCATTAACCTTCGATCTCCTTATGTGACCTGAGAAAAGCTACCTTTGTTTATTTGAGGGGTTTTCTTCACTGCAATTCTTTTAGTAGTATCTCTTCCTGTTTTTGCAGGAGGTATTACCATGTTATTAACAGACCGTAATTTTAACACTTCTTTCTTTGATCCAAGAGGGGGAGGAGACCCTGTTTTATTTGCACATCTTTTT
30	86	NCBI;cellular organisms;Eukaryota;Sar;Stramenopiles;Ochrophyta;PX clade;Xanthophyceae;Tribonematales;Heteropediaceae;Heterococcus;Heterococcus caespitosus;	21	0	40	463	172	1	80	120	2677	31	480	7	1	13	135	1	38	0	41	1	196	3	114	49	0	42	73	1	0	2	0	0	TCTAAGTGCGATTACCGCTCACTCTGGAGGATCGGTAGATTTAGCCATTTTTAGCTTACACGTATCTGGAGCAAGTAGTATTCTAGGAGCAATTAACTTCATTACTACCATCTTTAACATGCGTGGACCAGGAATGACCATGCACCGCTTACCGCTTTTTGCTTGGGCTGTGTTAATTACTGCATTCCTTCTTCTTCTTTCTCTTCCTGTGTTAGCAGGGGCGATTACCATGCTTCTAACCGATCGTAACTTTAATACAAGTTTCTTCGATCCAGCTGGTGGAGGAGACCCAATTCTATACCAACACCTATTT
31	87	NCBI;cellular organisms;Eukaryota;Sar;Stramenopiles;Ochrophyta;Bacillariophyta;Coscinodiscophyceae;Chaetocerotophycidae;Chaetocerotales;Chaetocerotaceae;Chaetoceros;	0	5	321	0	0	0	0	0	0	0	0	0	0	0	0	5	11	3	1775	23	0	0	0	1	0	0	0	0	47	0	0	2	ATTATCTAGTGGATCATCACATTCAGGTGGTGCTGTAGACTTAGCTATTTTTAGTTTACACTTATCTGGAGCTTCGTCAATCTTAGGAGCAATAAACTTTATTTGTACTATTTTCAATATGCGAGTAAAAAGTTTATCATTCCATAAATTACCTTTATTTGTTTGGGCTGTATTAATTACCGCGTTTTTATTATTGTTATCTTTACCTGTTTTAGCGGGTGCTATTACAATGTTATTAACAGACCGTAATTTTAATACAACTTTCTTTGACCCAGCGGGTGGTGGTGACCCTATTTTATACCAACACTTATTT
32	89	NCBI;cellular organisms;Eukaryota;Sar;Alveolata;Dinophyceae;Peridiniales;Heterocapsaceae;Heterocapsa;Heterocapsa circularisquama;	815	11	43	129	1	0	25	41	569	4	166	14	1	3	0	1	703	0	90	1	3	43	1	1	0	32	0	0	0	0	1	0	TCTTTCCACTTCTTTCATGTCTCTATCTCCATCTTCTATTTACTTCCTAGTTGTTGGTCTAGCAATTTCTGGTATCTCTTCTGCTCTTACTTCTCTAAATTTCCTTCTAACTATTACTAACATGCGTGTTTATTCTATGTCTCTAAAGCTAATGCCTCTTTTCAATTGGTCTATTCTAATTACTTCTAATCTTCTACTAATGTGTCTTCCTATTCTTACTGGTGCTCTTATTATGGTTCTATCTGACCTTAATCTTAATACTCTATTCTATGATCCTGTCTTCGGTGGTGATCCAGTTCTATACCAGCATCTATTC
33	91	NCBI;cellular organisms;Eukaryota;Opisthokonta;Metazoa;Eumetazoa;Bilateria;Protostomia;Ecdysozoa;Panarthropoda;Arthropoda;Mandibulata;Pancrustacea;Crustacea;Branchiopoda;Phyllopoda;Diplostraca;Cladocera;Ctenopoda;Sididae;Penilia;Penilia avirostris;	0	1	0	0	0	0	0	0	0	0	0	1	2	0	0	1	0	0	0	2	0	0	1	0	0	0	0	0	0	0	0	0	TTTGTCAAGAACAATCGCTCATGCAGGCGCTTCTGTAGATCTTAGGATTTTCTCCTTGCATTTGGCGGGGATTTCATCAATTCTTGGAGCTGTAAACTTTATTACGACAATTGTAAATATGCGATCAAAAGGAATAACCTTAGATCGTATCCCTCTCTTTGTGTGGGCTGTTGGAATTACTGCTTTATTACTTCTACTTAGGCTTCCTGTACTTGCAGGAGCTATTACTATGCTTCTGACGGACCGAAATTTAAATACTTCTTTCTTCGATCCTGCTGGAGGGGGGGACCCTATTCTTTATCAACACTTGTTT
34	92	NCBI;cellular organisms;Eukaryota;Opisthokonta;Metazoa;Eumetazoa;Bilateria;Protostomia;Spiralia;Lophotrochozoa;Mollusca;Bivalvia;Autobranchia;Heteroconchia;Euheterodonta;	0	0	0	0	0	0	0	0	0	0	1888	10	0	0	0	0	0	0	0	0	0	0	0	0	0	0	0	0	0	0	0	0	TTTGTCTGCTAATTTAGCTCATGCGGGAGGCTCTGTTGATTATGGAATTTTTTCCCTTCACTTAGCCGGTGTTTCTTCTATTTTAGGGGCTATTAATTTTTTAGCAACAACAGTAAACATGCGTCCTGAAATTATGGAGTTTAAGCGAGTTAGGTTGTTTGTCTGGTCTGTAGCTATTACAGCATTTTTACTGGTGGTTGCCATGCCTGTTTTGGCTGGGGCTATTACTATGCTGCTAACAGATCGTAACTTTAATACTTCGTTTTTTGATCCTTCCGGAGGGGGGGATCCCATTTTGTTTGTTCATCTTTTC
35	93	NCBI;cellular organisms;Eukaryota;Sar;Stramenopiles;Ochrophyta;Bacillariophyta;Bacillariophyceae;Bacillariophycidae;Bacillariales;Bacillariaceae;Pseudo-nitzschia;	148	25	238	532	144	0	130	47	3	0	195	12	0	15	48	0	240	0	64	3	52	0	0	1	0	191	0	0	0	2	1	0	TCTTTCTGGTGTCTTATCTCATTCAGGAGGTTCAGTTGATTTGGCTATTTTTAGCCTTCATTTATCTGGAGCAGCTTCCATTTTAGGTGCTATCAATTTCATTTGTACCATTGTAAATATGAGAACTGAAAGCTTGCCTTTTCACAAACTCCCACTTTTTGTCTGGGCTGTTTTCATAACAGCTATTTTATTATTGTTATCTTTGCCTGTACTTGCAGGAGCAATTACAATGTTATTAACTGATAGAAATTTTAATACAACATTTTTTGACCCTGCTGGTGGAGGTGATCCTGTTCTTTTCCAACATTTGTTT
36	95	NCBI;cellular organisms;Eukaryota;Sar;Alveolata;Dinophyceae;Peridiniales;Heterocapsaceae;Heterocapsa;Heterocapsa circularisquama;	13	0	0	0	116	1	78	109	663	75	289	57	0	3	3	1	0	0	0	1	97	0	20	0	0	603	1	0	1	1	0	0	TCTTTCTACTTCTTTCATGTCTCTTTCTCCATCCTCTATTTACTTCCTAGTTGTTGGTCTAGCAATTTCTGGTATTTCTTCTGCTCTAACTTCTCTAAATTTCCTTCTAACTATTACTAACATGCGTGTTTATTCTATGTCTCTAAAACTAATGCCACTTTTCAATTGGTCTATTCTTATTACTTCTAATCTACTACTAATGTGTCTACCAATTCTTACCGGTGCACTAATTATGGTTCTATCTGACCTTAATCTTAACACTCTATTCTATGATCCAGTCTTCGGTGGTGACCCTGTTCTATATCAGCATCTATTC
37	98	NCBI;cellular organisms;Eukaryota;Opisthokonta;Metazoa;Eumetazoa;Bilateria;Protostomia;Ecdysozoa;Panarthropoda;Arthropoda;Mandibulata;Pancrustacea;Crustacea;Multicrustacea;Thecostraca;Cirripedia;Thoracica;Thoracicalcarea;Balanomorpha;Chthamaloidea;Chthamalidae;Chthamalus;Chthamalus anisopoma;	0	0	0	0	0	1	1791	0	1	2	0	2	1	0	1	0	0	0	0	0	2	0	0	0	0	1	22	0	0	0	0	0	TCTTTCAAGTAACATTGCTCATTCTGGGGCTTCTGTGGATTTATCAATTTTTTCTTTACATTTAGCAGGAGCTTCTTCTATTTTAGGAGCTATTAACTTTATATCCACTGTTATCAATATGCGGGCAGAAACATTAACCTTTGACCGTATTCCTTTATTCGTTTGAAGTGTATTTGTGACAGTAATTCTTTTGCTGCTATCATTACCAGTATTAGCAGGAGCTATTACTATACTATTAACTGATCGGAATTTGAATACTTCATTTTTTGATCCTACAGGAGGAGGTGACCCAATTTTATATCAACATTTATTT
38	99	NCBI;cellular organisms;Eukaryota;Opisthokonta;Metazoa;Eumetazoa;Bilateria;Deuterostomia;Chordata;Tunicata;Thaliacea;Doliolida;Doliolidae;Doliolum;Doliolum nationalis;	0	140	0	1	0	0	3	0	0	0	0	0	0	0	0	0	0	0	0	0	2034	0	5	0	0	0	1	0	2	1	0	0	TCTTTCTAGGAACCTAGCGCACGCCAGGCCCTCGGTAGACTGTGCGATTTTCTCTCTTCATTTAGCCAGAGTGTCTAGCATCCTAAGATCT+AJ39ATTAACTTCTTAGTGACTATAATAAACATAATAAGTAAAAGGCAAAACTACGGTAACTTGACGCTATTCTGCTGGTCTATTGTAGTTACTACTATCCTCTTAATCCTTTCCTTACCTGTATTAGCCGCGGCGATTACGATACTTCTTTTCGACCGGAACTTTAATACTTCTTTCTTTGACCCTGCCAGAGGGAGAGATCCTATCCTTTACCAGCACCTATTC
39	103	NCBI;cellular organisms;Eukaryota;	42	165	484	36	29	0	6	476	0	0	489	0	88	1	0	30	57	3	44	0	12	472	20	23	0	1	0	0	37	0	0	18	TTTGAGTTCCATTACCGGACATAGTTCTCCTGCCGTTGATATGGCTATTTTTTCACTTCACTTAGCTGGAGCTTCTTCAATATTGGGCGCAGTAAACTTTATTACCACAATTCTTAATATGAGAGCACCTGGTATGACTCTTCATAAAATGCCTTTATTTGCTTGGTCTATGTTAGTAACTGCTTTTCTTCTTCTTTTAGCTGTTCCTGTGTTAGGCGGAGCTATTACTATGCTTTTAACCGATCGTAACTTTGGAACCACATTTTTCGATCCAGCTGGTGGAGGAGACCCTGTTCTTTTCCAACACCTTTTC
40	104	NCBI;cellular organisms;Eukaryota;Sar;Stramenopiles;Ochrophyta;Bacillariophyta;Bacillariophyceae;Bacillariophycidae;Bacillariales;Bacillariaceae;Pseudo-nitzschia;	1	13	4	7	2	0	0	0	0	0	0	0	0	0	0	2	48	0	11	0	0	0	2	0	1	2	0	0	0	0	0	0	ACTTTCAAGTGTTTTATCTCACTCGGGAGGTTCTGTTGATCTAGCGATTTTCAGTCTTCACTTATCAGGAGCAGCTTCAATTTTAGGTGCAATTAATTTTATTTGTACTATTGTAAATATGAGAACTGAAAGTTTACCATTTCATAAACTTCCTTTATTCGTTTGGGCTGTTTTCATTACTGCTATTTTATTATTACTATCGTTACCTGTTTTAGCTGGTGCGATTACAATGTTATTAACAGATAGAAATTTTAATACTACTTTCTTTGATCCTGCAGGTGGAGGAGATCCTGTACTTTTCCAGCATTTATTC
41	105	NCBI;cellular organisms;Eukaryota;Sar;Stramenopiles;Ochrophyta;Bacillariophyta;Mediophyceae;	2	0	859	0	0	0	0	0	1	0	0	0	0	0	0	0	15	0	894	7	0	0	0	0	0	0	0	0	0	0	0	2	TTTATCAAGTGGAACAGCACATTCAGGAGGTGCTGTTGACTTAGCAATTTTCAGTTTACACTTATCAGGTGCTTCGTCAATTTTAGGTGCAATTAATTTTATTTGTACTATTTTTAATATGAGAGTTAAAAGTTTATCATTTCATAAATTACCTTTATTTGTTTGGTCTGTTTTAATAACAGCATTTTTATTATTATTATCTTTACCAGTTTTAGCAGGCGCAATTACCATGTTACTGACTGATAGAAATTTTAATACAACTTTTTTTGACCCAGCCGGAGGAGGTGACCCAGTTTTATATCAACATTTATTT
42	107	NCBI;cellular organisms;Eukaryota;Opisthokonta;Metazoa;Eumetazoa;Bilateria;Protostomia;Ecdysozoa;Panarthropoda;Arthropoda;Mandibulata;Pancrustacea;Crustacea;Multicrustacea;Hexanauplia;Copepoda;Neocopepoda;Gymnoplea;Calanoida;	0	0	0	0	0	0	0	1	0	0	0	0	0	0	0	0	0	0	0	0	1	0	2555	0	0	0	0	7	0	2	0	0	TCTGGCTAGAAACATTGCTCATGCAGGGGGTTCTGTGGACTTTGCAATTTTTTCCTTACACTTAGCTGGGGTTTCTTCTATTTTAGGGGCCATCAACTTTATTAGTACTTTGGCCAACTTGCGGGTCTTTGGTATACTGCTAGAACAAATGCCCTTATTTGCTTGAGCAGTTTTAGTGACAGTTATTCTTCTTTTACTATCCTTACCGGTATTGGCAGGAGCAATTACAATACTTTTAACAGATCGAAATCTTAACACTACTTTCTATGACGCAGGAGGAGGGGGAGACCCCATCCTATATCAGCACCTTTTT
43	110	NCBI;cellular organisms;Eukaryota;Opisthokonta;Metazoa;Eumetazoa;Bilateria;Protostomia;Spiralia;Lophotrochozoa;Mollusca;Gastropoda;Heterobranchia;Euthyneura <gastropods>;Nudipleura;Nudibranchia;Doridina;Anadoridoidea;Polyceridae;Limacia;Limacia clavigera;	0	0	0	0	5	0	0	0	0	0	0	0	0	0	0	0	7	1	1	0	0	0	0	4335	0	0	0	0	0	0	0	0	CTATCAACTTTAGGGCACCCAGGAGCTAGTGTAGACCTAGGGATTTTTTCGCTACACTTAGCAGGGGTTAGTTCGATTTTGGGGTCTGCTAATTTTATCACAACTATCTTAAACATAAAAGGAGAAGCAATTTCGATAGAACTTTTACCATTATTTGTTTGGTCCGTTTTATTAACCGCAATTTTATTGCTACTATCATTACCTGTATTAGCAGGAGCTATCACCATACTTCTTACCGACCGAAATTTTAATACTAGATTCTTTGATCCAGCAGGTGGGGGGGATCCAATTCTTTACCAACATCTTTTT
44	111	NCBI;cellular organisms;Eukaryota;Opisthokonta;Metazoa;Eumetazoa;Bilateria;Protostomia;Ecdysozoa;Panarthropoda;Arthropoda;Mandibulata;Pancrustacea;Crustacea;Multicrustacea;Hexanauplia;Copepoda;Neocopepoda;Gymnoplea;Calanoida;Calanidae;Undinula;Undinula vulgaris;	0	0	0	0	1	0	52	1918	4	0	646	1	0	1	0	1	2	0	0	0	0	0	0	0	0	0	0	0	0	0	0	0	TTTATCAAGAAATATTGCGCATGCTGGAGCATCAGTTGATTTTGCTATTTTTTCTTTACATTTAGCAGGAGTGAGTTCTATTTTAGGGGCAGTTAATTTTATTAGGACTTTAGGAAATTTACGAGTTTTTGGTATATTATTAGATCGAATACCTTTATTTGCTTGAGCAGTTTTAATTACTGCTGTCCTATTATTACTGTCTTTACCAGTATTAGCTGGGGCTATTACAATATTATTAACAGATCGAAATCTTAATACTTCATTTTATGATGTAGGAGGAGGAGGTGATCCTATTTTATATCAACATTTATTT
45	112	NCBI;cellular organisms;Eukaryota;Sar;Alveolata;Dinophyceae;	232	23	33	79	35	1	69	200	1149	16	465	158	0	9	14	3	118	0	20	1	12	12	16	0	1	177	40	0	0	0	0	0	ATTATCTACTTCTTTTATGACTTTATCACCTTCAAGTATAGGAAATCTTATATTTGGATTATTAATTTCTGGTATATCTTCATGTCTTACATCTCTTAACTTTTGGATAACAATTCTAAATCTGAGATCATATTATCTGACATTAAAGACTATCCCATTATTTCCTTGGGCTTTCTTGATAACAGCTTTCATGCTTTTATTAACATTACCAATCTTATCTGGTACACTTTTATTATTAGTGGGTGATCTTCATTCTAATACTCTTTTCTTTGATCCAATATTTGGAGGAGATCCTATATTCTATCAACACTTATTT
46	113	NCBI;cellular organisms;Eukaryota;Opisthokonta;Metazoa;Eumetazoa;Bilateria;Deuterostomia;Chordata;Tunicata;Ascidiacea;Phlebobranchia;Ascidiidae;Ascidia;Ascidia ahodori;	104	14	20	24	7	0	6	122	100	0	148	3	11	1	1	9	278	0	28	1	0	131	0	10	1	1	0	0	0	0	0	0	GTTAAGCCATATTACAAGTCACTCTGGGGGAGCTGTAGACTTAGCTATTTTCAGCTTACACGTATCAGGTGCAAGTAGTATTTTAGGGGCAATTAATTTTATTACTACTATTTTTAACATGCGAGGACCTGGGCTTTTAATGCATAGATTACCTCTTTTTGTTTGGAGCGTCTTAATCACAGCTTTTCTTCTCTTGTTGTCACTACCAGTATTAGCAGGAGCAATTACAATGCTATTAACAGACCGGAACTTTTCAACAAGCTTTTTTGACCCAAGTGGAGGTGGTGATCCCATTTTATATCAACATCTTTTT
47	114	NCBI;cellular organisms;Eukaryota;Opisthokonta;Metazoa;Eumetazoa;Cnidaria;Anthozoa;Hexacorallia;Scleractinia;	2	274	33	7	0	0	0	6	2	0	3	0	264	0	0	10	102	0	5	1	0	308	12	4	0	1	0	0	0	0	0	29	TCTTTCAAGTAATTTGGGACATTCAGGTCCAGCTGTTGATATGGCTATATTAAGTTTACATTTGGCAGGAGCTTCATCTATCTTAGGAGCAATAAATTTTATTACGACGATCTTTAATATGAGAACTCCTGAGATGACATTACATAGAATGCCTTTATTTGTTTGGTCCATTTTGGTTACAGTCTTTTTATTAGTATTATCTTTGCCCGTGTTAGCGGGAGCAATTACAATGCTTTTGACAGATCGTAATTTTGGAACGGCATTTTTTGCACCAGAGGGAGGTGGTGATCCTATTTTATTCCAGCATTTATTT
48	115	NCBI;cellular organisms;Eukaryota;Sar;Stramenopiles;Ochrophyta;Bacillariophyta;Fragilariophyceae;Fragilariophycidae;Fragilariales;Fragilariaceae;Asterionellopsis;Asterionellopsis glacialis;	2	1	1639	1	0	0	0	0	0	0	0	0	0	0	0	0	27	0	624	3	0	0	0	0	0	0	0	0	0	0	0	0	TTTATCAAGTATTACAGCACACTCAGGTGGTTCTGTTGATTTAGCAATTTTTAGTTTACATTTATCTGGTGCTTCATCAATATTAGGTGCTATCAATTTTATTTGTACAATTTTCAATATGCGTGTAAAAAGTTTATCTTTTCATAAACTACCATTATTTGTTTGGTCGGTTTTAATTACCGCGTTTTTATTACTATTATCGTTACCAGTTTTAGCAGGAGCAATCACAATGTTATTAACTGATAGAAACTTTAATACAACTTTTTTTGACCCTGCAGGTGGAGGCGATCCTGTCTTATACCAGCATTTATTC
49	116	NCBI;cellular organisms;Eukaryota;Sar;Stramenopiles;Ochrophyta;Bacillariophyta;Coscinodiscophyceae;Thalassiosirophycidae;	182	0	208	63	0	0	0	0	0	0	0	0	0	0	0	0	886	0	165	6	0	0	9	10	0	2	5	0	0	0	0	0	ATTATCCAGTGCAACAGCTCATTCAGGCGGTTCTGTAGATTTAGCCATATTTAGTTTGCACTTATCCGGTGCATCTTCTATTTTAGGTGCTATCAATTTTATTTGTACAATTTTTAATATGCGAGTGAAAAGCTTGTCGTTTCATAATCTCCCATTATTTGTGTGATCTGTTTTAATCACAGCGTTTTTACTGTTATTGTCATTACCTGTATTGGCAGGAGCCATCACAATGTTATTAACAGACCGAAATTTTAATACTACCTTCTTTGATCCTGCAGGAGGTGGAGATCCTGTACTATTTCAGCACTTATTT
50	117	NCBI;cellular organisms;Eukaryota;Opisthokonta;Metazoa;Eumetazoa;Bilateria;Protostomia;Ecdysozoa;Panarthropoda;Arthropoda;Mandibulata;Pancrustacea;Crustacea;Multicrustacea;Hexanauplia;Copepoda;Neocopepoda;Gymnoplea;Calanoida;Acartiidae;Acartia;	45	9	0	0	1	0	1253	0	1	0	116	1	72	1	2	7	0	2	0	0	2	0	0	0	0	0	0	0	0	0	0	0	GCTCTCAAGTAATATTGCCCACGCAGGAGCTTCTGTAGATTTTGCTATTTTTTCCCTTCATCTGGCGGGCGCTAGATCAATTTTAGGGGCTGTAAATTTCATCTCAACTATTGGAAATTTGCGTTCTTTCGGGATGATTATAGAATTAATACCTCTATTTTCTTGAGCTGTATTAATTACTGCAGTGCTTCTTTTACTCTCCCTACCCGTGTTAGCAGGGGCTATTACTATATTACTAACAGACCGGAACCTAAATTCATCATTTTATGACGCTGGGGGGGGAGGAGATCCTATTCTGTATCAGCATCTTTTC
51	120	NCBI;cellular organisms;Eukaryota;Opisthokonta;Metazoa;Eumetazoa;Cnidaria;Hydrozoa;Hydroidolina;Siphonophorae;Calycophorae;Diphyidae;Muggiaea;Muggiaea atlantica;	0	1318	2	1	0	0	0	0	0	0	0	0	0	0	0	2	20	0	1	0	0	1	0	0	0	0	0	0	0	0	0	0	TTTAAGTAGTATATTAGCTCATTCTACACCTGGTGTAGATTTGGCTATACTAAGTCTTCATATGGCAGGGGTAGGAAGCTTGCTTGGGTCTATAAATTTCATGTGTACAGTAGCTTGTATAAGATGTGGAGCTCAGGTATCTCCATTTAAAATACCTTTATTCTGTTGATGTTTAGCTGTAGCTAGTATTCTATTACTAGTGTCTTTACCTGTTTTAGCAGGGGCTTTAACTATGCTTCTTTGTGATCGTAATTTTAATACAGCTTTTTTTGATCCTGCTGGAGGAGGAGATGTGATACTTTATCAACATTTATTT
52	122	NCBI;cellular organisms;Eukaryota;Rhodophyta;Florideophyceae;Rhodymeniophycidae;Rhodymeniales;Rhodymeniaceae;Rhodymenia;	23	4	131	93	1	0	2	2	0	0	8	0	18	0	1	34	355	0	67	1	0	51	9	4	0	0	0	0	0	0	0	115	ACTTTCTAGCGCAGATGGGCACCCTGGTCCAAGTGTTGACCTTGGGATCCTCAGTCTGCACTTGGCAGGTGCCTCTTCGATTCTGGGCGCCATTAATTTGATAACAACTATTCTCAATATGCGAGCTTCTGGTATGACGTTACACAAGATGCCGCTTTTTGTTTGGTCCATGCTAGTTACTGCATTTCTTCTCTTACTTGCAATTCCGGTTTTAGCTGGAGCGCTAACAATGTTGCTAACTGACCGAAACTTTGGGACTACATTTTTTGATCCTGCAGGTGGCGGTGATCCACTCTTGTGGCAGCATTTGTTC
53	123	BOLD;Cryptophyta;78.76	29	2	3	20	0	0	0	20	0	0	5	0	0	0	0	1	228	0	0	0	0	0	0	0	0	0	0	0	0	0	0	0	ATTAAGTAGTATAGCGGGTCATCCAAGTGGTGCTGTTGATTTAGCGATATTTAGTCTTCATGTGTCAGGAGCGTCATCAATACTTGGTGCTGTAAATTTCATTACAACAATTTTTAATATGAGGTGTCCTGGAATGACTATGCATCGATTGCCTTTATTCGTATGGGCAGTGTTGATTACTGCATTTCTTTTATTATTATCTTTGCCGGTATTAGCTGGAGCTATTACAATGCTTCTTTGCGACCGAAATTTTAATACAACATTTTTTGATCCATCAGGAGGGGGAGATCCGGTATTGTACCAACATTTGTTC
54	124	NCBI;cellular organisms;Eukaryota;Opisthokonta;Metazoa;Eumetazoa;Bilateria;Protostomia;Spiralia;Lophotrochozoa;Mollusca;Gastropoda;Caenogastropoda;Littorinimorpha;	1	1	0	1	0	1	0	0	0	0	1492	0	0	0	0	0	0	1	0	0	0	0	0	0	0	0	0	0	0	0	0	0	TTTATCAGGTAATCTAGCTCATTCAGGTGGGTCTGTTGATTTGGCTATTTTTGCCCTCCACCTTGCGGGGGTTTCTTCAATTTTGGGTGCGATTAATTTTATTACCACTACTATTAATATACGGTGAAACGGCTATCAATTTGAACACGTTCCATTGTTTGTGTGATCAGTAAAATTAACAGCAATCCTTTTACTCTTATCCCTTCCAGTTTTAGCTGGTGCAATCACAATATTACTAACCGATCGAAATTTTAACACATCTTTCTTTGATCCTTGTGGAGGTGGTGACCCTATTTTATACCAACACTTGTTC
55	126	NCBI;cellular organisms;Eukaryota;Opisthokonta;Metazoa;Eumetazoa;Bilateria;Protostomia;Ecdysozoa;Panarthropoda;Arthropoda;Mandibulata;Pancrustacea;Crustacea;Multicrustacea;Hexanauplia;Copepoda;Neocopepoda;Gymnoplea;Calanoida;	24	0	1	1145	0	0	0	0	14	1	2	0	52	10	6	0	0	0	0	0	0	0	0	0	0	0	0	0	0	0	1	0	TTTATCAAGAAATATTGCTCATGCAGGAAGATCAGTAGACTTCGCTATTTTTTCGTTACATTTAGCTGGTGTAAGTTCTATTTTAGGAGCTGTAAACTTCATTAGAACTTTAGGAAACTTACGAGTATTCGGTATGCTTTTAGATCGAATACCTTTATTTGCTTGAGCAGTTCTAATTACTGCTATCTTATTATTACTTTCATTACCAGTATTAGCAGGAGCTATTACTATGTTATTAACAGATCGTAATTTAAACACTTCATTTTACGATGTGGGTGGAGGGGGAGATCCTATCTTATATCAACATTTATTT
56	127	BOLD;Arthropoda;Copepoda;89.64	5	137	92	9	0	0	0	0	0	0	0	0	19	3	0	16	68	0	55	2	1	438	67	4	3	0	1	1	1	0	0	11	TTTATCTTCCAAGACAGGTCAACCTGGTCCAGCAATGGATTTAGCAATCTTAAGTTTACACGTAGCCGGAGCTTCTTCTATTTTAGGAGCAATAAATTTCATCACTACTATTTTAAATATGAGAACACCAGGCATGACGTTACATAAAATGCCATTATTCTCATGGTCTATATTAGTAACGGCATTTTTACTTTTATTATCTTTACCGGTTTTAGCTGGAGCAATCACAATGCTTCTAACTGATAGAAATTTTGGAACTGCTTTCTTTGAAGCTCAAACAGGAGGAGATCCAGTTCTATTCCAACACTTGTTC
57	131	BOLD;Cnidaria;79.1	1	3	12	0	0	1	1	0	0	0	10	0	6	0	2	1	8	0	8	2	0	1	0	0	0	2	0	0	0	0	0	0	TTTATCAGGTCCTCTGTATCATCCTGGTCCATCAGTAGATCTTGTAATTTTTAGTTTACATATTGCAGGTATTTCTTCTATTTTAGGAGCGGTTAACTTTATAACAACAATATGTAATATGCGTTGCCCAGGATTAACAATGTTTAAATTACCATTATTTGTTTGGTCTGTATTAGTTACAGCTATTTTACTATTATTATCATTACCTGTATTAGCTGGTGGTATAACCATGGTTATTACTGACCGTCATTTTAATACTGCATTCTTCGAACCAAAAGGGGGTGGGGATCCTGTATTATATCAACATTTATTT
58	133	NCBI;cellular organisms;Eukaryota;Rhodophyta;Florideophyceae;	4	5	89	1	0	0	0	0	1	0	0	1	6	0	0	270	114	0	66	3	0	16	146	34	0	0	3	0	0	0	0	438	ATTATCTAACAAACTTGGGCATGCAGGACCTTCAGTTGATATGGCAATTTTTGCACTGCATTTGGCCGGAGCATCTTCAATACTAGGAGCGGTTAATTTCATTACAACTATATTGAATATGAGAACACCAGGAATGACAATTCACAAGATGCCTCTTTTTGTATGGGCAATGCTGATTACAGCTTTCTTATTATTACTGGCCGTTCCTGTTCTTGCAGGTGCTATTACTATGCTTTTAACTGATAGAAATTTTGGAACCACATTTTTTAATCCTGCAGGTGGTGGAGATCCAGTTTTATTTCAACACTTATTT
59	134	BOLD;Annelida;Polychaeta;89.18	71	0	296	714	0	0	4	0	0	0	1	0	0	0	7	0	352	0	151	1	0	0	6	1	0	0	0	0	0	0	0	1	TCTATCAAGTGCAACAGCACATTCGGGAGGTTCTGTAGACTTAGCTATTTTTAGTTTACATTTATCTGGTGCATCTTCTATTTTAGGCGCAATTAATTTTATTTGTACAATCTTTAATATGCGAGTAAAAAGTTTATCTTTTCATAATTTACCATTATTTGTGTGATCTGTTTTAATTACTGCATTTTTATTATTGTTATCGCTTCCGGTATTAGCAGGAGCAATTACAATGCTATTAACAGATCGAAATTTTAATACAACTTTTTTCGACCCTGCAGGAGGTGGTGATCCGGTTTTATTTCAACATCTTTTT
60	135	NCBI;cellular organisms;Eukaryota;Opisthokonta;Metazoa;Eumetazoa;Bilateria;Protostomia;Ecdysozoa;Panarthropoda;Arthropoda;unclassified Arthropoda;Arthropoda sp. ZP317;	0	0	0	10	0	0	3	7	1	0	0	440	2	1	194	0	0	0	0	0	1041	0	0	0	0	1	1	2	0	2	0	0	TTTAAGGGGTAATGTATCTCACAGAGGAGCAGCAGTTGATTTTGCTATTTTCTCACTACATTTAGCAGGTATCTCATCTTTATTAGGAGCAGTAAATTTCATCACTACTATTATTAACTTACGAGCTCTGGGGCTATATTTAGATCGTATACCCATATTCCCGTGAGCAGTGTTGATCACTGCTATCTTATTACTATTGTCTCTTCCTGTTCTAGCAGGGGCTATTACTATACTTCTCACTGATCGAAATTTTAATTCTTCCTTCTACGATCCCAGAGGAGGAGGGGACCCTGTTTTGTACCAGCATCTATTT
61	136	NCBI;cellular organisms;Eukaryota;Opisthokonta;Metazoa;Eumetazoa;Bilateria;Protostomia;Spiralia;Lophotrochozoa;Annelida;Polychaeta;unclassified Polychaeta;Polychaeta sp. RCMBAR1217;	0	0	0	0	0	0	0	2	0	1	0	0	0	0	0	1	1189	0	0	1	0	0	0	0	0	0	0	0	0	0	0	1	TTTGTCAGGAAATTTGGCTCATGCTGGACCATCTGTTGATTTAGCTATTTTTTCTTTACATTTAGCAGGGGTGTCTTCTATTTTAGGGGCTTTAAATTTTATTACTACTATTATTAATATACGAAGGAGAGGTATGCGGTTCGAGCGGGTACCTTTATTTATTTGATCTGTAAAGATTACTGCGATTTTATTATTGTTAAGACTTCCTGTGTTGGCTGGGGGTATTACTATGTTATTGACGGATCGTAATTTAAATACTTCGTTTTTTGATCCTGCGGGAGGGGGAGATCCTGTCTTATATCAACATTTATTT
62	137	BOLD;Bacillariophyta;Mediophyceae;85.76	2	17	950	0	0	0	0	0	0	0	0	0	0	0	0	1	52	0	76	7	0	0	0	0	0	0	0	0	0	0	0	0	TTTATCTAGTGGTACCTCGCATTCAGGAGGTGCTGTTGATTTAGCTATTTTTAGCTTACACTTATCAGGAGCTTCATCAATTTTAGGTGCTATAAACTTTATTTGTACTATTTTTAATATGCGGGTTAAAAGTTTATCATTTCATAAGTTACCACTATTTGTATGGGCTGTATTAATAACAGCATTTTTACTTTTATTGTCATTACCTGTTTTAGCAGGAGCTATTACAATGTTATTAACAGATAGAAATTTCAATACAACTTTCTTTGATCCAGCAGGTGGAGGTGATCCCATTTTATACCAACATCTATTT
63	138	NCBI;cellular organisms;Eukaryota;Sar;Alveolata;Dinophyceae;	93	95	14	35	113	2	103	145	73	11	379	34	12	11	11	9	264	0	17	19	57	32	0	3	0	80	0	0	3	1	0	0	ATTAAGCACTTCTTTCATGAGTTTATCACCTTCAAGTACAGTTTTCATTATCTTTGGATTATTAATGTCAGGTATATCCTCATGTCTCACATCTCTTAATTTTTGGACAACAATTCTAAATCTGAGATCTTATTATCTGACATTAAAGATTATGCCATTATTTTCATGGGCTCTTTTGATAACAGGAGGAATGCTTTTATTAACATTACCAATCTTATCTGGTGCTCTTTTAATGATCTTGGCCGATCTTCATTCTAATACACTTTTCTTTGATCCAATTTTTGGAGGAGATCCTATATTCTATCAACACTTATTT
64	139	NCBI;cellular organisms;Eukaryota;Opisthokonta;Metazoa;Eumetazoa;	2	0	22	0	0	0	0	1	0	0	0	0	0	0	0	9	458	0	58	11	0	0	455	19	0	1	201	0	0	0	0	0	ACTTGCTTCAATTTCATTTCATTCAGGAGGGGCGGTTGATTGTGCCATTTTTGCTCTTCACGTAGCAGGAGCTTCTTCGATTCTTGGAGCCGTTAACTTTATTACAACTGTTTTAAATATGCGAGCGCCTGGGGTTTCTTTCCATCGAATGCCTTTATTTGTATGAAGTATTTTCGTAACTGTTGTTCTTCTTTTACTAGCAGTACCGGTACTTGCTGGAGCTATTACTATGCTATTAACAGATCGAAATTTTAATACAACTTTCTTTGATCCTGCTGGAGGGGGAGATCCTGTACTTTATCAGCATCTTTTC
65	142	NCBI;cellular organisms;Eukaryota;Sar;Stramenopiles;Ochrophyta;	147	11	694	93	29	0	74	77	20	2	472	72	1	1	2	0	406	0	65	0	19	24	0	4	0	13	0	3	0	0	0	1	ATTATCTAGTGTTCAGGCACACTCTGGACCTTCTGTAGACTTAGCAATCTTTAGTCTTCACTTAGCAGGTGCTTCGTCAATTATGGGTGCGGTAAACTTTATTACCACTATCTTAAATATGCGAGCTCCTGGTATCACTATGCACCGATTACCTCTGTTCGTGTGGGCAATCTTCATTACTGTTATTCTGTTACTACTTTCTTTACCTGTTCTTGCAGCAGCGATTACTATGTTATTAACAGATCGTAACTTCAACACTACCTTCTTCGATCCAGCTGGAGGAGGAGACCCTGTACTATACCAGCATCTATTC
66	143	NCBI;cellular organisms;Eukaryota;Opisthokonta;Metazoa;Eumetazoa;Bilateria;Protostomia;Spiralia;Gnathifera <animals>;Chaetognatha;Sagittoidea;	1211	0	0	0	0	0	0	0	0	0	0	0	0	0	0	1	0	0	0	0	0	0	0	0	0	0	0	0	0	0	0	0	ACTTTCTACGATAGGACATCCTGGAGCCGCCGTTGATTTAGGGATTTTCTCTCTTCATTTGGCCGGTGTAAGTAGAATTTTGGGTAGTGCTAATTTTATCACTACTATTTATAACATACGTTCGGTCGGCTTATCTATAGAGTACCTACCACTTTTTGCTTGATCGGTTCTTCTGACCGCCATCCTTCTTTTATTGTCCCTTCCAGTATTAGCAGGAGCCATTACTATGTTATTGACAGATCGAAACTTTAATACAACCTTTTTTGATCCTGCTGGTGGTGGTGATCCTATTTTATACCAACACCTATTC
67	146	NCBI;cellular organisms;Eukaryota;Opisthokonta;Metazoa;Eumetazoa;Bilateria;Protostomia;Ecdysozoa;Panarthropoda;Arthropoda;Mandibulata;Pancrustacea;Crustacea;Multicrustacea;Hexanauplia;Copepoda;Neocopepoda;Gymnoplea;Calanoida;Clausocalanidae;Clausocalanus;Clausocalanus parapergens;	0	0	0	0	0	0	0	0	0	0	0	0	0	0	0	0	0	0	0	1	0	1	0	1140	0	0	0	0	0	0	0	2	ACTATCTAGAAATGTGGCTCATGCAGGAGGATCAGTAGACTTTGCAATTTTTTCTCTTCATCTTGCTGGAGTGAGATCTATCTTAGGAGCAGTAAATTTTATTAGAACTTTAGGGAATTTACGAGTTTTTGGGATACTTTTAGACCGAATCCCATTATTTGCGTGGTCTGTTCTAGTTACTGCAATTCTTTTATTATTATCCTTACCAGTTTTAGCCGGTGCTATTACAATACTATTAACAGACCGTAATTTAAACACATCTTTCTATGACGTAGGGGGGGGTGGAGACCCTATTCTTTATCAACATTTGTTT
68	147	NCBI;cellular organisms;Eukaryota;Opisthokonta;Metazoa;Eumetazoa;Bilateria;Protostomia;Ecdysozoa;Panarthropoda;Arthropoda;Mandibulata;Pancrustacea;	650	0	1	56	0	0	2	0	69	5	271	12	0	0	16	0	0	0	0	0	1509	16	2	0	1	3	2	0	3	3	1	0	CCTGAGAAGAAACATTGCCCATGGGGGATCTTCTGTTGACTTCGCTATTTTTTCCTTACACTTAGCAGGGGTGTCGTCCTTATTGGGGGCAGTAAATTTTATTAGAACTCTAAGTAACCTGCGCTCAATAGGGATACTGGCAGATCGAATGCCTTTATTTCCTTGGGCAGTGTTAGTTACAGCTATCTTATTACTACTATCACTTCCTGTACTTGCGGGGGCTATTACTATGCTTTTAACTGACCGGAATTTTAACTCATCATTTTATGATCCAAGAGGTGGAGGGGACCCCCTATTATATCAACACCTGTTT
69	150	NCBI;cellular organisms;Eukaryota;Opisthokonta;Metazoa;Eumetazoa;Bilateria;Protostomia;Spiralia;Lophotrochozoa;Mollusca;Bivalvia;Autobranchia;Heteroconchia;Euheterodonta;Imparidentia;Neoheterodontei;Cardiida;Tellinoidea;Solecurtidae;Tagelus;	1111	1	0	1	0	0	0	0	0	0	0	0	0	1	0	0	0	0	0	0	0	0	0	0	0	0	0	0	0	0	0	0	TCTATCTGCTTGACTAGGGCATCCGGCTCCTGCTATGGAGTTTATAATTTTAGGCCTTCATCTTGCAGGGGTGTCGTCTATTTTTGCCAGAATTAATTTTGTCACTACAGGTGCCAATATGCGACCAGAGGGTATTGCCCCACAGCGAACAACTTTGTTTGTAGTTTCAGTTGTTATTACCTCTTTCTTATTGGTAGCTGCTATGCCTGTATTGGCGGCAGCTTTAACTATACTATTGACGGATCGGAATTTTAATACTTCATTTTTTGATCCTGTTGGTGGGGGTGACCCAGTTCTATTTATTCACTTATTT
70	151	NCBI;cellular organisms;Eukaryota;	0	0	13	39	0	1	36	34	6	2	941	2	0	3	2	0	1	0	11	0	0	0	3	0	0	35	0	0	0	0	0	0	TTTATCAGGTCCATTATACCATCCTGGTCCATCTGTAGATCTTTTAATTTTTAGTTTACATATAGCGGGAATTTCCTCAATTCTAGGAGCGGTTAATTTTATAACAACGATATGTAATATGCGTTGTCCAGGTTTAACAATGTTTAAATTACCTTTATTTGTTTGGTCTGTATTAGTCACAGCTTTTTTATTATTATTATCTTTACCTGTATTAGCTGGTGGTATTACTATGGTTATTACTGACCGTCATTTTAATACTGCATTTTTTGAACCTAAAGGAGGTGGAGATCCTGTATTATATCAACATTTATTT
71	153	NCBI;cellular organisms;Eukaryota;Opisthokonta;Metazoa;Eumetazoa;Bilateria;Protostomia;Ecdysozoa;Panarthropoda;Arthropoda;Mandibulata;Pancrustacea;	0	0	0	0	0	0	0	0	0	0	0	0	0	0	0	1	1026	0	0	0	0	0	0	0	0	0	0	0	0	0	0	0	TCTTAGGAGCAATATTGCCCATTCAGGGCCTTCAGTAGATTTTGCAATTTTTTCTTTACATTTAGCCGGGGTTTCTTCTTTATTAGGGGCTGTCAATTTTATCAGTACTCTTGGTAACCTTCGAACCTTGGGCTTGCTCTTGGATCGCCTACCTTTATTTGCTTGAGCAGTGTTAGTTACTGCAATTTTATTACTGTTGTCGTTACCTGTGCTGGCAGGAGCTATTACAATATTATTAACTGATCGTAATTTAAACACATCATTTTATGACCCTAGGGGAGGGGGAGACCCAATTCTCTATCAGCACTTATTT
72	155	NCBI;cellular organisms;Eukaryota;Sar;Alveolata;Dinophyceae;	0	0	0	0	46	0	13	10	982	16	80	27	1	3	3	0	3	0	0	0	46	0	2	0	1	21	0	0	0	1	0	0	ATTAAGCACTTCATTTATGAGTTTATCACCTTCAAGTACAGGAAATCTTATCTTTGGATTATTAATCTCATGCTGATTCTAAATCTGAGATCTTATTATCTGACATTAAAGACTATGCCATTATTCCCTTGGGCTCTCTTGATTACAGGAGGAATGCTTCTATTAACATTACCAATCTTATCTGGAGCTCTAGTAATGGTTATGGCTGATCTTCATTCTAATACACTTTTGTTTGATCCAATCTTTGGAGGAGATCCTATATTCTATCAACATTTATTT
73	156	NCBI;cellular organisms;Eukaryota;Sar;Stramenopiles;Ochrophyta;Bacillariophyta;	1	444	375	0	0	0	0	0	0	0	0	0	0	0	0	0	62	1	150	0	0	6	0	1	0	0	1	0	0	0	0	0	ATTATCTAGTGGTACTGCTCATTCAGGTGGTGCTGTAGATTTAGCAATTTTTAGTTTGCACCTTTCAGGAGCTTCTTCTATATTAGGAGCTATTAATTTTATTTGTACAATTTTTAACATGAGAGTTAAAAGTTTATCTTTTCATAAACTACCTTTATTTGTTTGGGCAGTTTTAATAACAGCTTTTTTATTATTGTTATCGTTACCTGTTTTAGCTGGAGCAATTACAATGTTATTAACTGATAGAAATTTCAATACAACTTTTTTTGACCCTGCAGGTGGAGGTGACCCTGTTTTATATCAGCATTTGTTT
74	158	NCBI;cellular organisms;Eukaryota;Sar;Stramenopiles;Ochrophyta;Bacillariophyta;	0	11	594	0	0	0	0	0	0	0	0	0	0	0	0	0	1	0	472	0	0	0	0	0	0	0	1	0	0	0	0	0	TCTTTCAAGCGGTACCTCGCACTCTGGAGGTGCTGTAGATTTAGCTATATTTAGTTTGCATTTATCGGGGGCATCTTCTATTTTAGGTGCAATTAACTTTATATGTACAATTTTTAATATGAGAGTTAAAAGTTTATCTTTCCATAAATTACCTTTATTTGTTTGGTCAGTTTTAATTACAGCATTTTTATTATTATTATCTTTACCAGTTCTTGCTGGAGCGATTACTATGCTATTAACAGATCGAAACTTTAACACTACCTTTTTCGATCCTGCAGGTGGAGGAGATCCCATTTTATATCAACATTTATTT
75	159	NCBI;cellular organisms;Eukaryota;	4	0	143	2	31	0	11	579	0	0	445	0	0	0	0	23	15	0	109	0	0	19	11	30	0	0	0	0	0	0	0	12	TTTGAGTTCTATTACTGGGCATAGTTCTCCTGCCGTTGATATGGCTATTTTTTCACTTCACTTAGCTGGAGCCTCTTCAATATTGGGCGCAGTAAACTTTATTACTACAATTCTCAATATGAGAGCACCTGGTATGACTCTTCATAAAATGCCTTTATTTGCTTGGTCTATGTTAGTAACTGCTTTCCTTCTTCTTTTAGCGGTTCCTGTATTAGGCGGAGCTATTACTATGCTTTTAACTGATCGTAATTTTGGAACTACATTTTTTGATCCAGCCGGTGGAGGAGACCCTGTTCTTTTCCAACACCTTTTC
76	160	NCBI;cellular organisms;Eukaryota;	21	0	0	0	0	0	32	2	0	0	1034	0	0	0	0	0	16	1	0	4	0	0	0	0	0	0	0	0	0	0	0	0	ATTAGCAGGTGTTTTTGCTCACTCTGGAGCGTCTGTTGACTTAGCTATTTTTAGTTTACACTTAGCAGGTATTTCTTCAATTGCAGGTGCGATTAATTTTATTGTTACTATTAATAATATGAGATGTCGTGGTATGATGTTTAGTCGTTTACCATTATTTGTATGAACTGTGTTCATTACTGCAATTTTACTACTATTATCATTACCTGTATTAGCAGGTGCTATTACAATGTTATTAACTGATAGAAATTTAAATACAACTTTTTTTGATGCTGCTGGTGGTGGTGATCCAGTATTATATCAACATTTATTT
77	162	NCBI;cellular organisms;Eukaryota;	59	127	411	78	128	2	18	386	7	0	537	3	174	5	2	80	235	3	142	2	1	1183	71	45	0	4	16	1	10	0	0	29	ACTTTCAAATAAACTTGGACACGCAGGACCTTCTGTTGATATGGCAATTTTTGCTCTTCATTTAGCGGGTGCTTCCTCAATTTTAGGTGCAGTTAATTTTATAACAACAATACTTAATATGAGAACACCTGGAATGACCCTTCATAAGATGCCTCTATTTGTATGGGCTATGTTAATTACAGCATTCTTACTTTTGTTAGCTGTTCCTGTTTTAGCTGGAGCAATTACAATGCTTCTAACTGATAGAAACTTTGGTACAACATTCTTTAATCCTGCAGGTGGTGGAGATCCAGTTCTTTTCCAACACTTATTC
78	164	NCBI;cellular organisms;Eukaryota;Opisthokonta;Metazoa;Eumetazoa;Bilateria;Protostomia;	0	0	7	0	0	1	1146	10	1	0	32	0	0	0	0	0	0	0	0	0	0	0	0	0	0	0	0	0	0	0	0	0	TTTATCTATAAAAGAAGAGGGCGCCGCTGTAGATTTCTTAATTATTACGTTACATATTAACGGAATGTCTTCCTTACTAAATTCCATAAATATGTTTGTAACAATAGCAAATCAACGATCATCCTCCGTTTGTTGATTACAAATGTATGTCTGGGCTCTATGAGTTACTTCCTTCTTAATTATAACAGCTATGCCCGTGTTAGCAGCAGCTTTAACTATGCTTTTTTCCGATAGGCACTGAGGCTCTTGTTTTTTTCAGCCAAAAGGTGGGGGCGACCCTATTTTGTATCAACATTTATTT
79	165	NCBI;cellular organisms;Eukaryota;Opisthokonta;Metazoa;Eumetazoa;Bilateria;Protostomia;	0	0	0	0	0	0	0	0	0	0	0	0	0	0	0	0	3	1	998	0	0	0	0	1	0	0	2	0	0	0	0	0	TTTATCTAGCACACTAGGTCACTCTGGCGCTTCTGTTGACCTTGCTATTTTCTCATTACATTTAGCAGGTATATCTTCTATTTTAGGTGCTATTAATTTCATTACTACTATTATTAATATACGATCTCCTGGTATAATCTTTGAACGTATATCATTATTTGTTTGAAGGGTACTAGTTACTGCTTTATTACTTTTATTATCATTACCTGTTTTAGCCGGTGCTATTACTATGTTATTAACTGACCGTAATTTTAATACTAGTTTTTTTGACCCTGCAGGCGGGGGGGATCCTATTTTATATCAACATTTATTT
80	166	NCBI;cellular organisms;Eukaryota;Opisthokonta;Metazoa;Eumetazoa;Bilateria;Protostomia;Spiralia;Gnathifera <animals>;Chaetognatha;Sagittoidea;	0	0	0	1052	1	0	269	0	0	0	0	0	0	0	19	2	0	0	0	0	0	0	0	0	0	2	0	0	0	0	0	0	ACTTTCTACAATAGGCCATCCTGGAGCCGCCGTTGATTTGGGGATTTTTTCTCTTCATTTGGCTGGTGTAAGTAGAATTTTGGGTAGTGCTAATTTTATCACTACTATTTATAACATACGTTCGGTCGGGCTATCTATAGAATACCTACCGCTTTTCGCTTGATCTGTTCTTCTGACCGCCATCCTTCTTTTATTGTCCCTTCCAGTATTGGCGGGGGCCATTACTATGTTATTAACAGATCGAAACTTTAACACAACTTTTTTTGACCCTGCTGGTGGTGGTGATCCTATTTTGTACCAACATCTATTC
81	169	NCBI;cellular organisms;Eukaryota;Opisthokonta;Metazoa;Eumetazoa;Bilateria;Deuterostomia;Chordata;Tunicata;Appendicularia;Copelata;Oikopleuridae;Oikopleura;Oikopleura longicauda;	1	910	16	246	0	0	0	13	0	0	2	0	39	0	0	2	490	0	0	0	0	217	0	0	0	1	0	0	1	0	0	0	TCTTTCTGCTTTGGAGACTCCTATGGATGCCATGATTTTTAGTCTCCATTTAGCTAGAATTAGTTCTATATTGGGAGCTATAAATTTTTTAACTACTATACTCATGAATGGTCCAAAGGGCTTTTCTATGTATAACCTTTATCTTTATTTATATTGTATGGCAGTTACTGTTTTTATGCTTTTAACTACCTTGCCTGTCTTAGCAGCCGGAATTACTATGATATTATTTGACCGTCACTTTAATACCTCATTTTTTAATGTAGCAGGTGGGAGAGATCCCATATTATTTCAACACTTGTTT
82	170	NCBI;cellular organisms;Eukaryota;Eukaryota incertae sedis;Picozoa;unclassified Picozoa;Picobiliphyte sp. MS584-11;	0	0	6	0	0	0	0	6	0	0	6	1	0	0	0	0	178	1	16	14	0	5	524	49	1	0	257	2	3	0	0	2	TCTTGCAGGAATTCAATTTCATTCAGGGGGAGCAGTAGATTGTGCTATTTTTGCTCTTCACGTAGCAGGAGCTTCTTCTATTTTAGGAGCTGTAAATTTTATTACAACTGTTCTTAACATGCGAGCTCCAGGAATCAGTCTTCACCGAATGCCTCTTTTTGTATGAAGTATTTTTGTAACTGTAGTACTTCTTCTATTAGCAGTACCTGTACTAGCTGGTGCAATTACTATGTTATTAACTGATCGAAACTTTAACACAACTTTCTTCGACCCTGCAGGGGGAGGAGATCCAGTATTATATCAGCATCTTTTC
83	171	NCBI;cellular organisms;Eukaryota;	9	54	35	3	1	0	0	35	0	0	15	0	37	0	0	5	23	0	13	0	0	125	20	4	1	0	1	0	6	0	0	1	GTTATCTTCTAAAACTGGTCAGCCAGGTCCAGCAATGGATTTAGCAATTTTAAGTTTACATATTGCAGGTGCTTCATCGATTTTAGGAGCAGTGAATTTTATTACAACTATTCTAAATATGAGAACTCCAGGAATGACTTTACATAAAATGCCATTGTTTGCATGGTCAGTATTAGTTACAGCATTCCTACTTCTATTATCACTACCAGTGTTAGCAGGTGCAATTACAATGTTATTAACTGATAGAAATTTTGGAACAGCTTTCTTTGAAGCACAAACTGGAGGAGATCCTGTATTGTTCCAACATTTATTC
84	172	NCBI;cellular organisms;Eukaryota;Viridiplantae;Chlorophyta;Chloropicophyceae;Chloropicales;Chloropicaceae;Chloropicon;Chloropicon primus;	11	0	25	77	116	1	14	91	247	11	236	3	2	0	16	5	9	0	21	0	65	8	270	121	2	20	175	3	0	0	0	0	TTTAAGTAGCATTACAGCACACTCGGGAGGTTCTGTAGATTTAGCTATCTTTAGTTTACACGTTTCAGGTGCTGCAAGTATCTTAGGTGCTATTAACTTTATCACCACAGTATTTAATATGCGTGCACCAGGAATGACTTTCCACCGTTTACCTTTATTCGTGTGGTCTGTTCTAATTACAGCATTCCTACTTCTTTTATCTCTTCCTGTCCTTGCAGGGGGGATTACAATGCTTCTAACAGACAGAAACTTTAACACAAGTTTCTTCGACCCAGCAGGTGGTGGTGACCCTGTTCTTTTCCAACACCTATTC
85	173	NCBI;cellular organisms;Eukaryota;Sar;Alveolata;Dinophyceae;	32	0	192	11	7	3	311	84	390	61	1854	376	0	29	4	2	5	0	0	0	0	0	4	0	0	192	0	0	0	0	0	0	TTTAAGCACTTCATTTATGAGTTTATCACCTTCAAGTACAGGAAATCTTATATTTGGATTATTAATCTCTGGTATATCTTCTTGTCTTACTTCTCTTAACTTTCTTATTACAATTCTTAATATGAGATCTTATTATCTGACATTAAAAACTATGCCATTATTTTCTTGGTCTCTCTTAATTACAGCTGGAATGCTACTATTAACTCTTCCAATATTAACTGGAGCTCTTGTAATGGTTCTAGCTGATCTTCATTCTAATACACTTATGTTTGATCCAATCTTTGGAGGAGATCCTATATTATATCAACATTTATTT
86	174	NCBI;cellular organisms;Eukaryota;	17	109	167	0	0	0	0	0	1	0	1	0	12	1	0	8	94	0	90	0	1	41	492	22	2	0	100	0	95	0	0	10	ATTGTCTTCTAAAGCTGGTCAACCAGGTCCTGCAATGGACTTAGCAATTTTAAGTTTACACTTAGCAGGAGCTTCATCAATTTTAGGTGCAGTGAATTTTATCACTACAATTTTAAATATGAGAACACCTGGAATGACATTACACAAAATGCCATTATTTGCTTGGTCAATTTTAGTAACAGCGTTTTTATTATTGCTCTCTTTACCAGTACTTGCCGGTGCAATAACGATGTTGTTAACAGATAGAAATTTTGGAACCGCCTTCTTTGAGGCTCAGACAGGAGGAGATCCTGTTTTATTTCAACATTTGTTT
87	178	NCBI;cellular organisms;Eukaryota;	0	3	0	0	8	0	0	2	0	0	0	0	0	0	0	0	0	0	0	0	0	61	0	0	0	0	0	0	0	0	0	1	TTTAGCAGGACCTTTATATCATCCAGGCCCATCTGTAGATTTATTAATTTTTAGTTTACACATTGCAGGTATTTCTTCTATTTTAGGAGCAGTTAACTTTATAACCACCATTTGTAACATGCGTTGTCCAGGAATGACTATGTTCAAATTACCTTTATTTGTTTGGTCAGTATTAGTTACAGCATTTCTGTTATTATTATCATTACCTGTCTTAGCAGGTGGTATTACAATGGTTTTAACGGATCGTCACTTTAATACTGCATTCTTTGAACCAAAAGGAGGAGGAGATCCAGTTTTATACCAACATTTATTC
88	180	NCBI;cellular organisms;Eukaryota;Opisthokonta;Metazoa;Eumetazoa;Bilateria;Protostomia;Ecdysozoa;Panarthropoda;Arthropoda;Mandibulata;Pancrustacea;	16	164	2	114	0	9	5	0	0	1	0	0	13	0	19	0	112	0	0	0	12	95	0	4	0	0	0	0	0	2	0	0	ATTAAGAGGAAACGTAGGACATTCAGGTATATCTGTGGATATAGCTATTTTTTCCCTTCATCTAGCTGGAATCAGATCTCTTGCAGGTGGAATTAATTTTGGTAGGACAATTTATAATTGTCGTCCTATTGGAGTGGATATATTCTTGGTCCCGGTTTACCCTTGAGCAATAGTAGTCACTAGAATTTTATTGGTGGTATCTCTGCCCGTCCTAGCAGGGGGAATTACTATACTTCTTTTTGACCGTAATCTAAACACTACGTTTTTTGATCCTAGAGGAGGAGGTGATGCAATTCTCTACCAACATCTTTTC
89	181	NCBI;cellular organisms;Eukaryota;Opisthokonta;Metazoa;Eumetazoa;Bilateria;Protostomia;Spiralia;Lophotrochozoa;Annelida;	0	0	0	0	0	0	0	1433	0	0	0	0	0	0	0	1	1	0	0	0	0	0	0	0	0	0	0	0	0	0	0	0	ACTAGCAGGCAATATTGCACACGCTGGTCCATCAGTAGACCTGGCTATCTTCTCCCTTCATCTAGCAGGTGTATCCTCCATTCTAGGTGCCCTAAATTTCATTACAACAGTTGTTAATATACGATGAATAGGACTCCGATTAGAACGAGTCCCATTATTTGTATGGGCAGTGAAGATTACAGCTGTTCTTCTCTTATTATCGCTCCCTGTATTAGCTGGAGGAATTACAATACTTCTAACCGATCGTAACCTTAATACCTCCTTCTTCGATCCAGCAGGCGGCGGAGACCCCGTACTCTACCAACACCTATTC
90	182	NCBI;cellular organisms;Eukaryota;Opisthokonta;Metazoa;Eumetazoa;	113	322	1157	27	0	0	8	78	1	0	75	1	144	0	0	411	680	0	105	3	4	115	70	15	4	8	3	0	11	1	0	201	TTTGAGTTCGATTACTGGTCATAGCTCACCCGCAGTAGATATGGCTATTTTTTCACTTCACTTAGCTGGAGCCTCTTCAATACTAGGTGCTGTAAACTTCATCACCACTATTCTTAATATGAGAGCTCCAGGAATGACTCTCCATAAGATGCCTTTATTTGCTTGGGCTATGTTAGTTACTGCTTTTCTACTTCTTTTAGCTGTTCCTGTTTTGGGTGGAGCTATCACTATGCTTCTTACTGACCGTAACTTTGGAACTACATTTTTTGATCCCGCTGGTGGAGGTGACCCTGTTCTTTTCCAACACCTTTTC
91	183	NCBI;cellular organisms;Eukaryota;Sar;Stramenopiles;Ochrophyta;Bacillariophyta;Coscinodiscophyceae;Coscinodiscophycidae;Paraliales;Paraliaceae;Paralia;Paralia sulcata;	5	0	2	0	0	1	268	35	0	1	1224	2	0	5	1	0	1	0	3	0	0	0	24	0	1	0	71	0	0	0	0	0	GTTATCAAGTGGTAATTCTCATTCTGGACCAGCTGTAGATTTAGCAATTTTCAGTTTACATTTGTCTGGTGCTTCTTCTATTTTAGGAGCAATAAATTTTATTACAACTATATTAAATATGAGAACTAAAGGAATGTTTATGCACAAACTTCCTTTATTTGCATGGTCAATTTTAATTACTGCTGTTTTATTACTTTTATCTTTACCTGTACTTGCTGGTGCTATCACAATGTTATTAACTGATAGAAATTTTAACACTACATTTTTTGATCCTGCAGGTGGAGGTGATCCAGTGTTGTATCAGCATTTATTT
92	184	NCBI;cellular organisms;Eukaryota;Opisthokonta;Metazoa;Eumetazoa;	23	129	195	5	29	0	11	388	1	0	405	6	26	0	3	64	37	0	57	1	1	581	69	23	2	1	9	0	2	0	0	5	TTTATCTTCTAAGACTGGTCAGCCAGGTCCAGCAATGGATTTAGCAATTTTAAGTTTACACATCGCAGGTGCTTCATCGATTTTAGGAGCAGTGAATTTTATTACAACTATTCTAAATATGAGAACGCCTGGAATGACTTTACACAAAATGCCATTGTTTGCATGGTCAGTATTAGTTACAGCGTTCTTACTTTTATTATCATTACCAGTTTTAGCTGGTGCAATTACAATGCTATTAACTGATAGAAATTTTGGAACAGCTTTCTTTGAAGCACAAACCGGAGGAGATCCTGTATTGTTCCAACATTTATTC
93	185	NCBI;cellular organisms;Eukaryota;Opisthokonta;Metazoa;Eumetazoa;Bilateria;	1	48	0	0	0	37	0	0	0	0	0	1	0	0	0	0	0	3	1	0	1	0	26	3	1	0	368	6	510	0	1	0	TATCTAGCTAGATTGGTCATTCTGATACCTCCGTTGATTTACTAATATTTGCTCTACATTTTGCCGGTACTTCCTCTCTTCTAGGAGGTATTAATTTTATAGCTAGTACCGCTCGGATGAGATGAACAGTTGAACCTTATTATTATTGAAGTAAATTACCCCTATATACCTTCTCATTATTCATTACAGCTTGATTATTAGTAATTAGCATTCCAGTATTAGCAGCAGGAATTACTATGCTATATTTTGACAGGCATTTTAATACCTCTTTCTAGGATCCATTTGGCGGAGGTGACCCATTATTATATCAGCACTTATTT
94	187	BOLD;Bacillariophyta;84.79	26	0	174	657	0	0	0	0	0	0	1	0	0	0	1	1	251	0	30	9	0	0	0	2	0	0	131	61	0	2	0	0	ATTATCAAGTATTAATGCACATTCGGGAGGTTCTGTTGATTTAGCAATTTTTAGTTTACATTTATCTGGTGCAGCTTCTATATTAGGAGCTATTAATTTTATTTGTACTATTTTCAACATGAGAGTAAAAAGTCTTTTTATGCATAGATTACCTTTATTTGTTTGGGCAATATTAATAACTGCTTTTTTATTACTATTATCATTGCCTGTATTAGCAGGAGCAATTACTATGCTGTTAACTGATAGAAATTTTAACACTACTTTTTTTGATCCTGCTGGCGGAGGTGACCCTGTTTTATTTCAACATCTTTTT
95	191	NCBI;cellular organisms;Eukaryota;Sar;Alveolata;Dinophyceae;	127	26	61	320	30	0	72	56	37	14	203	118	0	14	14	2	66	0	0	3	0	0	4	0	0	113	17	0	0	0	0	0	ATTATCCACTTCTTTTATGTCTTTATCACCTTCAAGTACAGGAAATCTTATATTTGGATTATTAATTTCTGGTATATCTTCATGTCTTACATCTCTTAACTTTTGGATTACAATTCTAAATCTAAGATCTTATTATCTGACATTAAAGACTATTCCATTATTTCCTTGGGCTTTCTTGATTACAGCTTTTATGCTTTTATTAACATTACCAATCTTATCTGGTACACTTCTTTTAATATTAGGTGATCTTCATTCTAATACACTTTTCTTTGATCCTACATTTGGAGGAGATCCTATATTCTATCAACATTTATTT
96	194	NCBI;cellular organisms;Eukaryota;Opisthokonta;Metazoa;Eumetazoa;Bilateria;Protostomia;Ecdysozoa;Panarthropoda;Arthropoda;Mandibulata;Pancrustacea;Crustacea;Multicrustacea;Hexanauplia;Copepoda;Neocopepoda;Gymnoplea;Calanoida;Metridinidae;Pleuromamma;	0	0	0	0	0	0	0	0	2	0	0	0	0	1	0	0	1530	0	0	0	5	1	87	2	0	1	885	898	3	1	4	0	TCTAGCCAGCAATATTGCCCATGCTGGAAGATCCGTAGACTTTGCTATTTTTTCTTTACATCTGGCAGGTGTGTCTTCTATTCTAGGTGCAATTAATTTCATTAGTACATTAAGTAATTTACGTGTTTTTGGTATATTCCTAGACCGTATGCCTCTTTTTGCATGAGCTGTTTTAATTACAACTATTTTATTGCTTCTTTCTTTACCTGTTTTAGCTGGTGCTATTACAATACTTCTAACAGATCGTAATTTGAACACTACTTTTTATGATGTGGGGGGCGGAGGAGACCCTATTTTATACCAGCACCTATTC
97	195	NCBI;cellular organisms;Eukaryota;	12	47	12	50	57	0	18	79	0	1	113	2	77	0	1	0	50	0	1	0	0	330	0	0	0	0	0	0	0	0	0	0	ACTATCAAGTGTGCAAGCTCACTCAGGACCTTCTGTAGATCTTGCAATATTCAGTTTACACTTAGGAGGTACATCGTCTATTTTAGGTGCCATTAATTTTATAACTACAATAATTAACATGCGTAGTCCTGGAATGTCTATGCATAAATTACCACTTTTCGTATGGTCTGTGTTAATTACAGCTGTACTTTTACTTCTATCGTTACCAGTATTAGCAGGTGCTATTACTATGCTACTGACTGACCGTAACTTTAACACAACTTTCTTTGATCCCGCAGGAGGAGGAGACCCTGTATTATATCAGCACCTATTC
98	196	NCBI;cellular organisms;Eukaryota;Opisthokonta;Metazoa;Eumetazoa;Bilateria;Protostomia;Spiralia;Lophotrochozoa;Annelida;Polychaeta;Sedentaria;Canalipalpata;Terebellida;Terebelliformia;Trichobranchidae;Terebellides;unclassified Terebellides;	0	0	0	0	0	0	0	0	0	0	0	0	0	0	0	0	0	0	0	0	1	0	3	0	0	0	908	1	0	1	0	0	ATTATCAGATAACATGGCCCATGCTGGGCCATCTGTTGACTTAGCTATTTTTTCACTACATTTAGCCGGAATTTCATCTATTTTAGGCT+AJ99CAATTAATTTTATTACTACTGTAATTAATATGCGATGAAAAGGACTACGATTAGAACGCGTTCCGCTATTTGTTTGAGCTGCTGTTATTACAACTGTTCTCTTACTTTTATCTCTTCCAGTACTAGCTGGTGCCATTACTATACTTTTAACAGATCGAAACATTAATACTTCTTTTTTTGACCCTGCAGGAGGTGGTGACCCTATTCTTTATCAACATTTATTT
99	199	NCBI;cellular organisms;Eukaryota;	0	0	205	0	0	0	0	0	0	0	0	0	0	0	0	2	0	0	0	0	0	0	0	0	0	0	0	0	0	0	0	0	TTTAGCAGGTCCTTTATACCATCCAGGTCCTTCTGTAGATCTTTTAATTTTTAGTTTACATATAGCCGGAATATCATCAATTTTAGGAGCTGTTAATTTTATTACTACAATTTGTAATATGCGTTGTCCTGGTATGTCAATGTTCAAATTACCCTTATTTGTATGGTCAGTATTAGTTACAGCTTTTCTTTTATTATTATCTTTACCTGTTTTAGCTGGTGGTATTACAATGGTCTTAACTGATCGACATTTTAATACAGCGTTTTTTGAACCAAAAGGAGGTGGAGATCCAGTATTATATCAACATTTATTT
100	200	NCBI;cellular organisms;Eukaryota;Sar;Stramenopiles;Oomycota;	9	0	141	55	0	0	0	0	0	0	0	1	0	0	0	0	67	0	388	9	44	0	98	4	0	1	20	2	10	0	0	1	ATTAAGTACTTCTTTAATGAGCTTATCACCTGTGACTATAGATCTTATTATTGATGGATTACTTGTTTCAGGTATATCTTCTTTCTTATCTTCATTAAATTTCATGGGAAGTATTAGTAATTTACGTTTATCTGGATTAGTTCTTTTAAATATTCCTTTATTTACTTGGGGTATCATAATAACTGCTCTTTTACTTATATTGACTCTACCTATTTTAACTGGTGCTTTAGGAATATTACTAGGAGATCTTCATTTTAATACCGTATATTTTGATTCAGGTTTTGGTGGTGATCCCGTATTATATCAACATTTCTTT
101	201	NCBI;cellular organisms;Eukaryota;	1	6	9	0	0	0	0	1	0	0	0	0	0	0	0	2	98	0	19	0	0	0	433	14	0	1	174	0	39	1	0	15	ATTAGCAAGTATTGCTTTCCATTCAGGAGGAGCGGTTGATTGTGCAATTTTTGCTCTTCACGTTGCAGGAGCTTCTTCAATTCTTGGAGCAGTAAACTTCATTACAACTGTAATGAACATGCGAGCACCAGGAATTAGCCTTCACCGAATGCCTCTATTTGTATGAAGTGTTTTCGTAACTGTTGTACTTCTTTTACTAGCTGTACCTGTACTTGCAGGAGCAATTACGATGCTACTAACAGATCGAAACTTCAACACAACTTTCTTTGACCCAGCTGGGGGAGGAGATCCTGTGCTTTATCAGCACCTTTTC
102	202	NCBI;cellular organisms;Eukaryota;Sar;Alveolata;Dinophyceae;	0	0	1	0	0	0	18	0	0	0	1231	0	0	15	0	2	0	0	0	0	0	0	0	0	0	0	0	0	0	0	0	0	ATTAAGCACTTCTTTCATGACAAGTACAGGAAATCTTACTATTACTCTCAGGTATATCTTCATGTCTCACATCTCTTAACTTTTGGATAATGCCATTATTTCCTTGGGCTCTCTTGATTACTGGAGGAATGCTTTTATTAACATTACCAATCTTATCAGGAGCCTCTGCTGATCCTCATTCATCCAATTTGGAGGAGACCCTATATTCTATCAACTTGACACTTATTT
103	208	NCBI;cellular organisms;Eukaryota;Sar;Stramenopiles;Ochrophyta;PX clade;Phaeophyceae;Ectocarpales;Chordariaceae;	0	22	3	1	0	0	0	0	0	0	0	0	1	0	0	2	0	0	0	0	0	0	0	1	0	0	0	0	145	1	1	0	ATTAAGTAGTGTACAAGCACATTCAGGACCAGCGGTAGACTTAGCTATTTTTAGTTTACATTTATCTGGTGCATCATCAATTTTAGGTGCAATCAATTTTATGACAACAATTTTAAATATGCGTGCACCTGGAATGGGTATGGAAAGAATACCATTATTTGTTTGGTCAGTATTTGTTACAGCATTTTTATTAGTTATGTCACTTCCAGTTTTAGGTGGTGCAATTACAATGCTTTTAACTGATCGTAACTTTAATACCACATTCTTTGATCCTGCAGGTGGTGGAGATCCTGTTTTATTCCAACATTTATTC
104	210	NCBI;cellular organisms;Eukaryota;Sar;Stramenopiles;	55	0	27	30	597	0	16	69	434	96	170	10	16	43	13	9	88	0	27	1	16	5	13	0	0	435	2	0	1	1	0	0	TTTAAGTAGTGTACAAGCACATTCTGGTCCTTCAGTAGATTTAGCGATCTTTAGTTTACACCTTTCAGGTGCTTCGTCAATTTTAGGAGCGATTAATTTCATTACTACTATTTTTAATATGCGAGCACCTGGTATGACTATGCACCGTCTACCTTTATTTGTGTGGGCCATTCTAATTACCGCATTCCTATTATTATTATCGTTACCTGTTTTAGCTGGTGCAATTACTATGCTATTAACTGATCGTAACTTTAATACTACTTTTTTTGACCCTGCTGGTGGGGGAGATCCAGTACTTTACCAACATTTATTT
105	211	NCBI;cellular organisms;Eukaryota;Sar;Stramenopiles;Ochrophyta;Bacillariophyta;Mediophyceae;	0	0	314	3	0	0	0	0	0	0	0	0	0	0	0	0	4	0	508	0	0	0	0	0	0	0	0	0	0	0	0	0	ATTATCAAGTGGAACTTCTCACTCAGGAGGTTCTGTTGATTTAGCAATTTTTAGTTTACACCTGTCTGGTGCTTCGTCAATTTTAGGAGCAATAAATTTTATTTGTACTATTTTTAATATGCGAGTAAAAAGTTTAGCTTTTCATAAATTGCCTCTTTTTGTTTGGGCAGTATTAATTACAGCATTTCTGTTGTTATTATCTTTGCCAGTTTTAGCAGGTGCTATTACTATGCTATTAACTGATAGAAATTTTAATACAACATTTTTTGACCCTGCTGGTGGAGGTGATCCTGTATTGTATCAGCATTTGTTT
106	212	BOLD;Mollusca;77.11	0	0	30	0	5	0	0	13	0	0	21	0	0	0	0	54	31	0	0	0	0	9	338	98	0	0	21	0	0	0	0	57	TTTATCTAACAAACTTGGTCATGCTGGACCTTCGGTTGATATGGCAATTTTTGCACTGCATTTAGCTGGAGCATCTTCAATTCTAGGAGCAGTTAATTTTATTACAACTATATTGAATATGAGAACTCCAGGAATGACAATTCATAAGATGCCTCTTTTTGTATGGGCAATGCTGATTACAGCCTTCTTATTATTGCTGGCCGTTCCTGTTCTTGCAGGGGCAATTACTATGCTTCTAACTGATAGAAATTTTGGAACTACATTTTTTAATCCTGCAGGTGGAGGAGATCCAGTTTTATTTCAACACTTATTT
107	215	BOLD;Bacillariophyta;Bacillariophyceae;89.32	0	0	0	0	0	74	0	0	0	0	1	0	0	0	0	0	0	0	0	0	0	1	1	0	0	2	0	6	299	0	0	420	TTTATCAGGAATTGAAGCACACTCAGGAGGTTCTGTAGATTTAGCTATCTTTAGTTTACATTTAGCAGGAATTTCTTCATTATTAGGAGCAGTAAACTTTATTACTACTATTATTAATATGAGAGTACCTGGGTTAACAATGCATAAGTTACCTTTATTCGTATGGGCAGTTTTAATTACAGCTGTTTTATTATTATTATCATTACCTGTATTAGCTGGAGGTATTACTATGTTATTGACAGATCGAAACTTTAACACTAGTTTCTTTGACCCTGCAGGGGGAGGAGATCCTATTTTATACCAGCATTTATTC
108	219	NCBI;cellular organisms;Eukaryota;Viridiplantae;Chlorophyta;Chloropicophyceae;Chloropicales;Chloropicaceae;Chloropicon;Chloropicon laureae;	31	1	9	63	63	0	98	128	105	1	448	7	1	2	31	1	272	0	74	0	189	7	562	503	1	12	389	2	1	0	1	0	CTAAGTAGTATCACAGCACACTCTGGTGGTGCCGTAGATATGGCTATTTTTAGCTTACACGTTTCAGGTGCCGCAAGTATTTTAGGAGCTATCAACTTTATTACTACAGTTTTTAACATGCGTGCTCCAGGAATGACTTTTCACCGTCTTCCACTTTTCGTATGGTCAGTGTTAATCACAGCATTCCTACTTCTTCTATCCCTACCTGTTTTAGCAGGAGGTATTACTATGCTTTTAACAGACCGAAACTTCAATACAAGTTTCTTTGACCCTGCAGGTGGTGGTGACCCTGTGTTATTCCAGCACCTATTT
109	220	NCBI;cellular organisms;Eukaryota;Sar;Stramenopiles;Ochrophyta;Bacillariophyta;Bacillariophyceae;Bacillariophycidae;Bacillariales;Bacillariaceae;Cylindrotheca;Cylindrotheca closterium;	0	319	7	1	1	0	0	0	0	0	1	0	2	0	2	0	14	1	8	0	0	261	0	0	0	0	1	0	0	0	0	0	TCTTTCAGGAATTATTGCTCACTCAGGTGGTGCAGTAGATTTAGCAATCTTTAGTCTTCACTTATCTGGAGCAGCTTCTATTTTAGGTGCAATTAACTTTATTTGTACAATTGTTAACATGAGAACCGAGAGTCTTCCATTCCATAAGTTACCTTTATTTGTATGGGCTGTTTTCATTACTGCAATTTTATTATTGTTATCTTTACCAGTATTAGCAGGTGCTATTACTATGTTATTAACTGATAGAAATTTCAATACTACATTTTTTGATCCTGCAGGTGGAGGTGATCCTGTATTGTATCAGCATTTATTC
110	222	NCBI;cellular organisms;Eukaryota;Sar;Stramenopiles;Ochrophyta;Bacillariophyta;	1	7	356	0	0	0	0	0	0	0	0	0	0	0	0	0	7	0	340	3	0	0	0	0	0	0	0	0	0	0	0	0	TTTATCAAGTGGAACAGCTCATTCAGGAGGTGCTGTTGATTTAGCAATTTTTAGTTTACACTTATCTGGAGCCTCATCTATTTTAGGAGCAATTAATTTTATTTGTACAATTTTTAATATGCGTGTAAAAAGTTTATCTTTTCATAAATTACCGTTATTTGTATGGTCTGTTTTAATTACTGCATTTTTATTGCTACTTTCTTTACCTGTTTTAGCTGGAGCTATTACAATGCTTTTAACAGATAGAAATTTTAATACAACTTTTTTTGACCCTGCTGGTGGTGGTGATCCAGTTTTATATCAACATTTATTT
111	223	NCBI;cellular organisms;Eukaryota;Opisthokonta;	38	11	177	6	0	0	0	9	0	0	0	0	1	0	0	7	124	0	49	0	0	39	128	6	1	0	9	0	0	0	0	1	TTTATCCTCTAAGACGGGTCAACCAGGTCCAGCAATGGATTTAGCAATTTTAAGTTTACACGTAGCCGGGGCTTCTTCTATATTAGGAGCAATAAATTTCATTACTACTATTTTAAACATGAGAACACCTGGTATGACTTTACATAAAATGCCATTATTCTCATGGTCGATATTAGTAACGGCGTTTTTACTTTTATTATCATTACCAGTTTTAGCTGGTGCAATAACAATGCTTCTAACTGATAGAAACTTTGGAACCGCTTTCTTTGAAGCTCAAACAGGGGGAGATCCTGTTCTTTTCCAACACTTATTT
112	225	NCBI;cellular organisms;Eukaryota;Opisthokonta;Metazoa;Eumetazoa;Ctenophora;Tentaculata;Cydippida;Haeckeliidae;Haeckelia;	0	0	0	1	1	0	0	0	0	0	1	0	0	0	0	1	0	0	0	0	0	0	0	0	0	0	0	0	0	0	0	0	ATTGTCTTCTTATCCTGCCGCTCCTTCATATTCAACCGATTTTCTTATATTTTCTTTACATTTAGCTGGGGCTTCTTCTATTTTATCTTCTATTAATTTTGTTTCGACTGTTTTTTTTTTACCTTTAATTTCTTTTTTTTCTTTTTTTCAATATCCTTTATTTATCATTGCTCAACTTACTGTTAGTTTTTTATTGATTATATCTTTACCAGTTTTAGCTGCAGCTATTACTATGTTATTATTTGATCGTAATTTTAATACTTCTTTTTTTTCTAATTTTTTAGGTGGTGATTTATTATTATATCAACATTTATTT
113	227	BOLD;Cnidaria;79.08	2	156	2	1	0	1	0	0	1	0	0	0	43	0	0	9	41	0	0	0	0	50	0	0	0	0	1	0	91	0	0	1	TCTTTCAAGTAATTTAGGACATTCAGGTCCTGCTGTTGATATGGCTATATTAAGTTTACATTTGGCAGGAGCTTCATCTATTCTAGGAGCTATAAATTTTATAACAACCATTTTTAATATGAGAACTCCTGAGATGACATTACATAGAATGCCTTTATTTGTTTGGTCCATTTTAGTTACAGTTTTTTTATTAGTATTATCTTTACCCGTGTTAGCGGGAGCAATTACAATGCTTTTGACTGATCGTAATTTTGGTACGGCATTTTTTGCCCCAGAGGGCGGTGGTGATCCTATTTTATTTCAACATTTGTTT
114	229	NCBI;cellular organisms;Eukaryota;Sar;Alveolata;Dinophyceae;	0	23	10	24	10	0	23	105	1	1	38	22	4	2	11	0	0	0	0	0	416	22	1	0	1	50	45	1	0	0	1	1	ATTAAGCACTTCTTTCATGAGTTTATCACCTTCAAGTACAGGAAATCTATTAATTGGATTATTAATGTCAGGTATATCTTCATGTCTCACATCTATTAACTTTTTTACAACAATTCTAAATCTGAGATCTTATTATCTGACATTAAAGACTATGCCATTATTCTCTTGGGCTCTCTTGATTACAGGAGGAATGCTTTTATTAACATTACCAATCTTATCAGGTGGTCTTGCTATGCTCTTGGCTGATCTTCATTCTAATACACTTTTCTTTGATCCAATCTTTGGAGGAGATCCTATATTCTATCAACACTTATTT
115	232	NCBI;cellular organisms;Eukaryota;Opisthokonta;Metazoa;Eumetazoa;Bilateria;Protostomia;Spiralia;Lophotrochozoa;Bryozoa;Stenolaemata;Cyclostomatida;Crisiidae;Crisia;	1642	1	0	1	0	0	0	0	0	0	0	0	0	2	0	1	0	0	0	0	0	0	0	0	0	0	0	1	0	0	0	0	CTTTCCGATTCTTTGGCACATAGAGGAAAAAGAGTTGATTTAACTATTTTCTCTTTACATTTAGCAGGGGTTTCTTCAATTTTAGGGGCCATCAATTTTATTTCTACAATAATTAATATACGAGGTAGAATAAAAATAGATAAGATACCTTTATTTACATGGTCAATCATTATTACAGCAATTTTATTATTGTTATCTTTGCCAGTTTTAGCAGGAGGTATTACAATACTATTAACAGATCGAAATTTTAATACATCATTTTTTGATGTTAGAGGAGGAGGTGACCCTTTACTTTTTGAGCATATTTTC
116	233	NCBI;cellular organisms;Eukaryota;Opisthokonta;Metazoa;Eumetazoa;Bilateria;Protostomia;	0	0	0	0	0	0	0	0	0	0	0	0	0	0	0	0	0	0	0	0	827	0	0	0	2	0	0	0	1	0	0	0	TCTTAGTGGTACTTCGGGCCATTCTAGCCTATCAGTGGATTGTGTTATTTTTTCTCTACATTTAGCTGGTGTTTCTTCTCTACTAGGTGCTATTAATTTTTATTCTACTATTACTAATATACGTGTTTTAGGTATAACTTTAGAGCGAATGCCAATATTTCCTTGATCAGTTTTGGTTACAGCGGTTTTATTATTAGTTTCTCTTCCAGTGTTGGCCGGCTGCATTACCATATTGCTTACTGACCGAAATTTTAATTCTGGCTTTTACCAGAGTAGGGCTGGCGGGGATCCTGTATTATTCCAGCATTTATTT
117	234	NCBI;cellular organisms;Eukaryota;Opisthokonta;Metazoa;Eumetazoa;Bilateria;Protostomia;Ecdysozoa;Panarthropoda;Arthropoda;Mandibulata;Pancrustacea;Crustacea;Multicrustacea;Hexanauplia;Copepoda;Neocopepoda;Gymnoplea;Calanoida;Temoridae;Temora;Temora discaudata;	1	30	2	1	477	2	279	79	0	11	2	103	0	0	242	2	0	0	0	0	0	0	0	1	0	2	0	0	0	0	0	0	TTATCTAGAAACTCAGCTCATGGTGGAAGGTCTGTAGATTTCGCAATTTTCTCTTTACATTTAGCGGGGGTGAGGTCAATTCTCGGAGCTGTAAATTTTATTTCTACTCTAGGTAATTTACGAGTTTTCGGAATAGTTATGGACCAAATACCTTTATTTGCTTGAGCAGTATTGATTACAGCTGTCCTATTGCTTTTATCTCTCCCTGTCTTGGCAGGCGCTATTACTATACTATTAACGGATCGAAATTTAAATTCTTGTTTTTATGATACTGCTGGGGGAGGTGATCCTATTCTTTATCAACACTTATTT
118	235	NCBI;cellular organisms;Eukaryota;Sar;Alveolata;Dinophyceae;	319	10	21	58	190	0	35	52	74	8	74	34	1	3	16	3	22	0	0	2	0	20	6	0	0	66	1	0	1	0	0	1	ATTATCTACTTCTTTTATGACTTTATCACCTTCAAGTACAGGAAATCTTATCTTTGGATTATTAATCTCTGGTATATCCTCATGTCTTACATCTCTTAACTTTTGGATTACAATTCTAAATCTGAGATCTTATTATCTGACATTAAAGACTATCCCATTATTTCCTTGGGCTTTCTTGATTACAGCTTTCATGCTTTTATTAACATTACCAATTTTATCTGGTACACTTATTTTAATATTAGGTGATCTTCATTCTAATACACTTTTCTTTGATCCAATATTTGGAGGAGATCCTATATTCTATCAACACTTATTT
119	237	NCBI;cellular organisms;Eukaryota;Sar;Stramenopiles;Ochrophyta;Bacillariophyta;Mediophyceae;	0	16	2	0	1	0	0	0	0	0	0	0	0	0	0	0	0	0	13	0	0	13	0	1	0	0	0	0	0	0	0	0	ATTATCAAGTGGAACATCACACTCAGGAGGTGCTGTTGATTTAGCAATTTTTAGTTTACACTTATCAGGTGCTTCTTCTATTTTAGGAGCAATTAATTTTATTTGTACTATTTTTAATATGAGAGTAAAAAGTTTAGCTTTTCACAAATTACCTCTTTTTGTGTGGGCCGTGTTAATTACAGCTTTTTTATTATTATTATCTTTACCTGTATTAGCAGGTGCTATTACTATGTTGTTAACAGATCGAAATTTTAATACTACTTTTTTTGATCCAGCAGGAGGAGGAGATCCTGTATTGTATCAACATTTGTTT
120	238	NCBI;cellular organisms;Eukaryota;Opisthokonta;Metazoa;Eumetazoa;Bilateria;Protostomia;Spiralia;Lophotrochozoa;Sipuncula;Phascolosomatidea;Phascolosomatiformes;Phascolosomatidae;Antillesoma;Antillesoma mexicanum;	0	0	0	0	0	0	0	0	0	0	0	0	0	0	0	0	0	0	276	0	0	0	0	0	0	0	0	0	0	0	0	5	TCTCTCAGGAGCCCTAGCTCATGCCGGGGCCTCAGTGGACCTCGCCATCTTCTCTCTCCATCTCGCCGGAGTAAGATCAATTCTAGGGGCTCTAAACTTTATCTCTACAGTAACTAATATACGCCCTAACAAACTATCTTGAGAACGAATTCCTCTCTTCGTATGAGCCGCATTCATCACCGTCATTCTTTTACTACTAGCACTACCAGTCTTAGCTGGGGCGATCACCATGCTCTTAACAGACCGAAATTTAAACACAGCTTTCTTCGACCCGGGGGGCGGAGGAGACCCAATTCTCTTCAGCCATCTATTC
121	239	NCBI;cellular organisms;Eukaryota;Sar;Stramenopiles;Oomycota;	1	0	1017	0	0	0	0	0	0	0	0	0	0	0	0	0	0	0	0	0	0	0	0	0	0	0	0	0	0	0	0	0	TTTATCAAGTGTTCAAGCACATTCAGGTCCTTCTGTAGATTTAGCAATTTTTAGTCTACATTTAGCAGGTATTTCTTCTATTTTAGGAGCTGTAAATTTCATTTCTACTATTTTAAATATGAGATTCCCAGGACTTACTTTTCATAAATTACCTTTATTTGTTTGGTCTGTTTTAATTACTGCTGTTTTATTATTACTATCGTTACCTGTTTTAGCAGGTGCAATTACTATGTTATTGACTGATAGAAATTTAAATACTGCTTTTTTTGATCCATCTGGAGGAGGTGATCCTGTACTTTACCAACATTTATTT
122	240	NCBI;cellular organisms;Eukaryota;Opisthokonta;Metazoa;Eumetazoa;Bilateria;Protostomia;	54	10	342	0	1	0	0	0	1	0	1	0	8	0	0	0	359	0	182	0	2	0	35	2	0	0	7	0	0	1	0	0	TTTGAGCTCTATTACTGGACATAGCTCTCCTGCAGTTGATATGGCTATTTTTTCTCTCCACTTAGCTGGAGCCTCTTCAATATTAGGTGCAGTAAACTTTATAACCACTATTCTTAATATGAGAGCACCTGGAATGACTCTTCATAAAATGCCTTTATTTGCTTGGTCTATGTTAGTAACTGCTTTTCTTCTTCTTTTAGCCGTTCCCGTATTAGGTGGAGCTATTACTATGCTTTTAACTGACCGTAACTTCGGAACTACATTTTTTGATCCAGCTGGTGGAGGAGATCCTGTTCTTTTCCAACACCTTTTC
123	241	NCBI;cellular organisms;Eukaryota;Sar;Stramenopiles;Ochrophyta;Bacillariophyta;Mediophyceae;Cymatosirophycidae;Cymatosirales;Cymatosiraceae;Minutocellus;Minutocellus polymorphus;	2	0	28	14	0	0	0	0	0	0	0	0	0	0	0	0	63	0	56	0	0	0	0	0	0	0	0	0	0	0	0	0	GCTTTCAAGTGGAACTTCTCACTCAGGTGGTGCTGTTGATCTAGCTATTTTCAGTTTACACCTTTCAGGAGCTTCATCAATCCTAGGAGCAATTAACTTTATATGTACTATTTTTAATATGAGAGTGAAAAGTTTGTCATTCCACAACTTACCTTTGTTTGTTTGGGCTGTTTTAATTACGGCTTTTCTACTATTGCTGTCTTTACCTGTTTTAGCAGGAGCAATAACAATGTTATTGACTGATAGAAATTTCAACACTACTTTCTTCGACCCTGCGGGGGGAGGAGATCCTGTGTTATACCAACATTTGTTC
124	242	NCBI;cellular organisms;Eukaryota;Opisthokonta;Metazoa;Eumetazoa;Bilateria;Protostomia;Ecdysozoa;Panarthropoda;Arthropoda;Mandibulata;Pancrustacea;Crustacea;Multicrustacea;Hexanauplia;Copepoda;Neocopepoda;Gymnoplea;Calanoida;Eucalanidae;Subeucalanus;	0	0	0	0	2	0	0	0	0	0	0	1	0	0	741	0	0	0	0	0	158	0	0	0	0	0	0	0	0	0	0	0	TCTCTCTAGAAATATCGCCCACGCTGGGGGTTCTGTGGACTTTGCTATTTTTTCTTTACATCTCGCAGGGGTTAGTTCTATTTTAGGGGCAGTAAATTTTATCAGTACCGTAAGAAATCTACGATCTTTTGGCATGTTATTTGACCAGATGCCACTCTTTGCCTGGTCTGTTGTAATCACAGCAGTTCTCTTACTTTTATCTTTACCTGTATTGGCCGGAGCAATTACAATACTACTAACAGATCGAAACTTAAATACCTCATTTTATGATGTGGGGGGAGGAGGAGATCCTATCTTATACCAGCATCTGTTT
125	243	NCBI;cellular organisms;Eukaryota;Opisthokonta;Metazoa;Eumetazoa;Bilateria;Protostomia;Spiralia;Lophotrochozoa;Annelida;Polychaeta;Errantia;Phyllodocida;	0	0	0	0	0	0	0	685	0	0	0	0	2	0	0	1	1	0	0	0	0	0	0	0	0	0	0	0	0	0	0	0	GCTAGCTGGAAATATCGCTCATGCGGGCCCGTCGGTTGATCTGGCTATTTTCTCCCTTCATCTTGCCGGGGTGTCCTCTATCTTGGGGGCCCTCAACTTTATCACAACAGTTGTAAACATACGCTCAAAGGGACTACGTCTAGAACGAGTTCCTTTATTCATTTGGGCGGTTAAAATCACTGCTATTCTCCTTTTACTCTCCCTCCCGGTCTTAGCAGGGGCCATTACAATGCTACTCACTGATCGGAACTTAAATACAACCTTCTTTGATGCGGCAGGGGGCGGGGATCCAATTCTATATGAGCACCTGTTC
126	244	NCBI;cellular organisms;Eukaryota;Sar;Alveolata;Dinophyceae;	4	233	3	4	6	0	0	10	0	0	11	3	10	0	0	6	22	0	0	6	0	100	4	3	0	0	0	0	1	0	0	0	TTTAAGTACTTCTTTAATGAGTTTATCACCTTCAAGTACAGCTTTTATTATCTTTGGATTATTCATGTCAGGTATATCCTCATGTCTGACAAGTTTGAACTTTTTAACAACAATGTGGAATCTAAGATCTTGTAATCTGACATGTAATACTATGCCATTATTCCCTTGGGCTATCCTTTTAACAGGAGGAATGCTAGTCTTCACATTGCCAATATTAACTGGTGGTCTTCTCATGGTCTTGGCTGATCTTCATTCTAATACAGTTTTCTTTGATCCAATCTTTGGTGGAGATCCTATATTATATCAACATTTATTT
127	245	NCBI;cellular organisms;Eukaryota;Opisthokonta;Metazoa;Porifera;Demospongiae;Heteroscleromorpha;Bubarida;Dictyonellidae;Scopalina;Scopalina ruetzleri;	0	0	0	0	0	0	0	0	0	0	0	0	1	0	0	0	3	0	0	0	0	1	0	0	0	0	0	0	0	0	0	673	TTTATCATCTGTTCAAGCACACTCAGGTGGTGCTGTGGATATCGCAATATTTAGTTTACATATTGCAGGTGTATCATCAATTTTAGGTGCGATTAACTTTATCACAACTATCTTAAACATGAGAGCACCAGGTCTAGCAATGCATAGACTACCATTATATGTATGGTCAGTATTAATTACAGCAGTGTTATTATTATTATCATTACCAGTATTAGCAGGAGCAATTACAATGTTATTAACAGATCGAAACTTTAATACAACATTCTTTGATCCAGCAGGTGGTGGTGACCCAATTCTATATCAACACTTATTC
128	248	NCBI;cellular organisms;Eukaryota;Opisthokonta;Metazoa;Eumetazoa;Cnidaria;Anthozoa;Hexacorallia;Scleractinia;Faviina;	1	104	9	0	0	0	0	0	0	0	0	0	60	0	0	0	20	0	2	0	0	28	0	0	0	0	0	0	6	0	0	0	TCTTTCAAGTAACTTGGGACATTCTGGTCCTGCTGTTGACATGGCTATATTAAGTTTGCATTTGGCAGGAGCTTCATCGATTTTAGGAGCAATAAACTTTATTACAACCATTTTCAATATGAGAACCCCTGAGATGACATTACATAGAATGCCTTTGTTTGTCTGGTCCATTTTAGTTACAGTTTTTTTATTAGTATTATCTCTACCCGTTTTAGCGGGAGCAATTACAATGCTTTTGACAGATCGTAATTTCGGTACAGCATTTTTTGCTCCAGAGGGTGGTGGTGATCCTATATTATTTCAGCATTTATTT
129	249	NCBI;cellular organisms;Eukaryota;Opisthokonta;Metazoa;Eumetazoa;Cnidaria;Scyphozoa;Rhizostomeae;	27	64	141	1	12	0	0	6	0	0	13	0	8	0	0	15	103	0	42	1	2	129	13	8	2	0	0	0	0	0	0	14	TTTGAGTTCTATTACTGGTCATAGCTCTCCTGCTGTAGATATGGCTATTTTTTCACTTCACTTAGCTGGAGCTTCTTCAATACTGGGTGCTGTAAACTTCATTACAACTATTCTTAATATGAGAGCTCCTGGAATGACTCTTCATAAAATGCCTTTATTTGCATGGGCTATGTTAGTTACCGCTTTTCTTCTTCTTTTAGCTGTTCCTGTCTTGGGTGGAGCTATCACTATGCTTCTTACTGACCGTAACTTTGGAACTACTTTTTTTGATCCAGCTGGTGGAGGTGATCCTGTTCTTTTCCAACATCTTTTC
130	250	NCBI;cellular organisms;Eukaryota;Viridiplantae;Chlorophyta;Chloropicophyceae;Chloropicales;Chloropicaceae;Chloropicon;unclassified Chloropicon;Chloropicon sp. RCC4434;	6	0	22	63	59	0	7	32	251	0	49	0	0	0	0	1	4	0	21	0	4	0	61	13	0	8	51	9	0	0	0	0	TTTAAGTAGTATTATGGCCCATTCAGGTGGGTCTGTAGACTTAGCGATTTTTAGTCTTCATGTATCTGGAGCTGCAAGTATTTTAGGTGCATTAAACTTCATCACTACAATTTTTAATATGAGAGGTCCTGGAATGGGATTCCATAGACTACCTCTATTTGTGTGGTCAGTTTTAATTACTGCCTTTTTGTTACTTCTATCTCTACCTGTACTAGCAGGTGCGATTACCATGTTACTAACAGATCGTAACTTTAATACTAGTTTCTTTGATCCTGCTGGAGGAGGAGACCCTGTTCTTTTCCAACATCTGTTT
131	251	BOLD;Heterokontophyta;83.17	12	0	3	21	58	0	1	79	29	0	204	0	158	3	3	1	33	0	20	1	8	243	0	2	0	1	0	0	0	0	0	0	ATTAGCGAGTATACAAGCACACTCAGGACCTTCTATTGATTTAGCAATTTTCAGTTTACACTTAGCTGGTGCTTCATCAATTTTAGGAGCTATTAACTTCATTACTACTATCGTAAATATGAGAGCTCCTGGTTTAACATTCCATAGAATGCCTTTATTTGTATGGGCTGTATTAATTACTGCAATTCTTCTATTATTATCATTACCTGTATTAGCTGGTGCAATCACTATGCTATTAACAGATAGAAACTTCAATACAACTTTCTTCGACCCAGCTGGTGGAGGTGACCCTGTGTTATATCAACACCTATTC
132	252	NCBI;cellular organisms;Eukaryota;Stramenopiles;	38	127	123	5	0	0	0	0	0	0	1	0	22	0	0	6	68	0	34	0	0	71	120	4	0	0	9	0	2	1	0	2	ATTATCTTCTAAGACCGGTCAACCTGGTCCGGCAATGGATTTAGCAATTTTAAGTTTACACGTAGCTGGAGCTTCTTCTATTTTAGGAGCAATTAATTTCATAACTACTATTTTAAATATGAGAACACCAGGTATGACGTTACATAAAATGCCATTATTCTCATGGTCGATATTAGTCACAGCATTTTTACTTTTATTATCTTTACCAGTTTTAGCAGGAGCAATTACGATGCTTCTAACGGATAGAAACTTTGGAACTGCTTTCTTTGAAGCTCAAACAGGAGGAGATCCAGTTTTATTCCAACACTTGTTT
133	253	NCBI;cellular organisms;Eukaryota;Sar;Stramenopiles;Ochrophyta;Raphidophyceae;Chattonellales;Chattonellaceae;Chattonella;	1	133	26	0	0	0	0	0	0	0	3	0	16	0	0	2	15	0	34	0	0	190	9	0	1	1	0	0	0	0	0	9	TTTATCCTCTAAGACAGGTCAACCAGGACCAGCAATGGATTTAGCAATTTTAAGTTTACACGTAGCTGGGGCTTCTTCTATTTTAGGAGCAATTAATTTTATTACTACTATTTTAAACATGAGAACACCAGGCATGACGTTGCATAAAATGCCATTATTTTCATGGTCGATATTAGTAACGGCATTTTTACTTTTATTATCTTTACCAGTTTTAGCAGGAGCAATTACAATGCTTCTAACGGATAGAAATTTTGGAACCGCTTTCTTTGAAGCCCAAACAGGAGGAGATCCAGTTCTATTCCAACACTTATTC
134	256	NCBI;cellular organisms;Eukaryota;Opisthokonta;Metazoa;Eumetazoa;Bilateria;Protostomia;Spiralia;Lophotrochozoa;Mollusca;Bivalvia;Autobranchia;Heteroconchia;Euheterodonta;Imparidentia;Galeommatida;Galeommatoidea;Galeommatidae;Galeomma;Galeomma turtoni;	5	300	9	0	0	0	1	21	0	0	2	0	27	0	0	27	43	0	5	0	0	190	4	0	0	0	0	0	3	0	0	2	ATTGACTATCCAACAAGGAATGGGAATGGATCTAGTCATTTTTGCAATTCATATCTTAGGCATGTCATCAATTATGGGTTCTATTAACATTGTCACAACTATCTTGAATATGAGAGCTCCTGGAATGACTTTGATGAAAATGCCTTTATTTGTTTGGACTTGGTTAATCACAGCTTATTTGCTTATTGCAGTTATGCCTGTTCTTGCTGGTGCAGTGACAATGACACTAACCGATAGACATTTTGATACACATTTTTTTAATCCTGCTGGCGGCGGTGATCCCATATTATTCCAGCACATTTTT
135	257	NCBI;cellular organisms;Eukaryota;Opisthokonta;Metazoa;	9	68	16	0	28	0	0	83	3	0	154	0	127	0	0	58	147	0	19	0	0	426	0	2	1	0	1	0	5	0	0	8	TCTTTCATCATCCGCAGGCACACCTGGTATGTCTATGGACCTAGCCATTTTTTCACTTCATTTAGCTGGTGTATCATCAATTTTGGGAGCTGCTAATTTTATAACAACTATATTTAACATGAGAACGCCAGGAATGACTTTACACAAAATGCCATTATTTGCTTGGGCAATGCTCATAACAGCCTTCTTATTATTGCTTGCAGTTCCGGTACTAGCAGGAGCTATAACTATGCTTCTCACAGATAGAAATTTTGGCACAACCTTTTTTATACCAGAGGGAGGAGGCGATCCAATTTTGTTTCTTCACCTATTT
136	259	NCBI;cellular organisms;Eukaryota;Sar;Alveolata;Dinophyceae;	0	0	0	0	1	0	48	81	183	10	264	1	0	0	0	0	0	0	0	0	0	0	0	0	0	69	0	7	0	1	0	0	GTTAAGCACTTCTTTCATGAGTTTATCACCTTCAAGTACTACTTCTCTTATATTTGGATTACTTATCTCTGGTATTTCTTCATGTCTCACTTCTATTAACTTCTGGATAACTATTCTAAACATGAGATCTTATTATTTGACCTTAAAGACTATGCCATTATTCCCTTGGGCTCTATTGATTACTGGAGGTATGCTTCTCTTAACTTTACCTATATTATCTGGTGCATTACTTATGGTTATATCTGATCTTCACTCTAATACATTATTCTTTGATCCTATATTTGGAGGTGATCCTATTCTTTATCAACACTTATTT
137	261	NCBI;cellular organisms;Eukaryota;Opisthokonta;Metazoa;Eumetazoa;Bilateria;Protostomia;Ecdysozoa;Panarthropoda;Arthropoda;Mandibulata;Pancrustacea;	3	27	19	9	16	0	22	73	1	2	739	8	32	0	2	0	44	0	3	0	5	8	441	17	1	16	87	0	8	0	0	0	ATTAAGTACGCTTGCATTCCATAGTGGAGGTGCAGTTGATCTTGCGATCTTCTCTCTACACGTTTCTGGACTTTCAAGTATCCTTGGTGCGGTAAACTTCATTACAACCGTCCTAAATATGCGTGCACCAGGAATGCACTTCCATCGCCTTCCACTATTTGTATGGGCGGTCTTCATTACTGCAATTCTTCTTCTTCTTGCGCTTCCAGTGCTTGCTGGAGGAATTACTATGCTTCTCACTGATCGTAACTTTAATACCTCATTCTTTGACCCAGCAGGTGGGGGTGACCCTATTCTCTTCCAGCACCTGTTC
138	264	NCBI;cellular organisms;Eukaryota;Rhodophyta;Florideophyceae;	2	3	0	0	0	0	0	0	0	0	0	0	0	0	0	0	1	0	1440	1	0	1	0	0	0	0	1	0	0	0	0	2	CTGAGTTCTATCCAAAGTCATTCTGGAGCATCAGTTGATTTAGCAATTTTTAGTTTACATTTATCTGGAGCATCATCAATTTTAGGAGCTGTAAACTTTATATCAACTATAATAAATATGAGAAATCCTGGACAAAGTATGTACAGAGTTCCATTATTTGTTTGATCTATTTTTGTGACTGCATTTTTACTATTATTAGCTGTCCCCGTTTTAGCAGGAGCTATAACTATGCTTTTAACTGATCGTAATTTTAATACTGCATTTTTTGACCCCGCTGGTGGCGGTGATCCAATTTTATATCAGCATTTATTT
139	266	NCBI;cellular organisms;Eukaryota;Opisthokonta;Metazoa;Eumetazoa;Bilateria;Deuterostomia;Echinodermata;Eleutherozoa;Asterozoa;Asteroidea;	0	1129	1	0	0	0	0	0	0	0	3	0	0	0	0	1	0	0	0	0	0	0	0	0	0	0	1	0	0	0	0	0	CCTCTCTAGAGGACTAGCCCACGCTGGTGGTTCTGTTGACCTCGCTATCTTTTCTCTCCATCTTGCAGGGGCCTCTTCCATACTAGCCTCTATTAATTTTATTACAACAGTTATAAATATGCGCACTCCAGGAATATCTTTTGACCGACTACCACTGTTTGTTTGGTCCGTTTTCGTGACCGCATTTCTTCTACTTCTTTCCCTTCCTGTCCTTGCCGGTGCAATAACAATGCTACTTACAGACCGAAATATAAATACTACATTTTTTGACCCTGCAGGTGGTGGTGATCCTATACTGTTTCAACACCTTTTC
140	267	NCBI;cellular organisms;Eukaryota;Opisthokonta;Metazoa;Eumetazoa;Bilateria;	0	0	0	0	115	2	10	89	26	0	310	1	1	1	3	0	0	2	0	0	11	0	16	12	0	1	0	0	0	0	0	0	TTTATCAAGCATTCAATATCATCCAGGCGCTAGTGTTGATCTCGCAATTTTTAGCTTACATATAGCAGGTGTATCGTCTATCGCGGGTGCTATAAACTTTATTACTACAGTGTTAAATATGAAAGCACCAGGAATGTACTGGCACCGAACTCCCTTATTCGTTTGGGCTGTTTTTATTACAGCGGTGTTGCTTTTGTTATCGTTACCCGTTTTGGCTGGAGCTATAACTATGCTTTTGACTGATAGAAATCTTAATACCTCGTTTTTTGACCCTTCCGGGGGAGGCGATCCCGTATTATACCAACACTTATTT
141	268	NCBI;cellular organisms;Eukaryota;Sar;Alveolata;Dinophyceae;	32	75	62	283	3313	5	1203	398	606	26	718	53	4	95	260	9	27	0	8	0	541	86	24	6	1	99	3	0	1	0	0	1	ATTAAGCACTTCTTTCATGAGTTTATCACCTTCAAGTACTGGAAATCTTATCTTTGGATTAATAATCTCAGGTATATCCTCATGTCTCACATCTCTTAACTTTTGGACAACAATTCTAAATCTGAGATCTTATTATCTGACATTAAAGACTATGCCATTATTCCCTTGGGCTCTCTTTATTACAGGAGGAATGCTTTTATTAACATTACCAATCTTAACAGGAGCTTTTCTAATGGTCTTGGCTGATCTTCATTCTAATACACTTTTCTTTGATCCAATCTTTGGAGGAGATCCTATTTTCTATCAACACTTATTT
142	270	NCBI;cellular organisms;Eukaryota;Viridiplantae;Chlorophyta;Mamiellophyceae;Mamiellales;Mamiellaceae;Micromonas;Micromonas pusilla;	6	289	2	0	1	0	0	0	0	0	0	0	5	0	0	1	34	0	0	0	0	0	0	0	0	0	2	0	0	0	0	0	ATTAAGTCATATTACAAGTCACTCTGGAGGTGCCGTAGATTTAGCTATTTTCAGTTTACACGTTTCAGGAGCAAGTAGTATTTTAGGTGCAATTAATTTTATTACAACCATTTTTAATATGCGAGGACCTGGATTACTTCTTCACCGTCTGCCATTATTTGTGTGGAGTGTACTAATTACAGCTTTTTTACTTTTATTATCTCTTCCAGTTTTAGCAGGAGCTATTACAATGCTTTTAACTGATCGTAATTTTTCAACTAGTTTTTTTGACCCAAGTGGTGGTGGTGACCCGATTTTATATCAGCATTTATTC
143	271	NCBI;cellular organisms;Eukaryota;Opisthokonta;Metazoa;Eumetazoa;Cnidaria;Hydrozoa;Hydroidolina;Siphonophorae;Calycophorae;Sphaeronectidae;Sphaeronectes;Sphaeronectes koellikeri;	0	0	0	0	1	0	0	0	0	0	0	0	0	0	0	0	0	1	0	0	0	0	0	513	0	0	0	0	0	0	0	0	ATTATCGAGTGGAATTGCTCATTCAGGACCATCAGTTGATTTTGCTATATTTAGTTTACATTTAGCAGGTGCAGCCTCTTTAATGGGGTCTATAAACTTTACTGTTACAATATTATTAAATAGAGCTAATTCTATAAATGTTTGAAGAGCTCCATTATTTATATGAGCTCTGTTAGTCACTTCTGGATTACTGATAGGATCATTACCAGTCTTAGCAGGGGCGATAACAATGCTATTAACAGATAGAAATTTTAATACAACCTTTTTCGATCCTACAGGAGGAGGTGACTGTATTTTATTTCAACATTTATTT
144	272	NCBI;cellular organisms;Eukaryota;Opisthokonta;Metazoa;Eumetazoa;Bilateria;Protostomia;Spiralia;Lophotrochozoa;Annelida;Polychaeta;	0	0	0	0	0	0	0	0	0	0	0	0	0	0	0	3	0	0	204	0	0	0	0	0	0	0	0	0	0	0	2	29	TTTAGCTAGAAATGTGGCACATGCGGGTCCTTCTGTTGATTTTGCTATTTTTTCTTTACACTTGGCAGGAATTTCTTCTATTTTAGCATCGTTGAATTTTATTACTACTGCTATAAATATGCGTTCTAGGGGAATACGATTAGAGCGAGTTCCTTTGTTTGTTTGGTCTGTGGGTATTACTGCATTACTTCTTTTATTATCATTACCTGTATTGGCGGGAGCTATTACAATGTTATTGACTGATCGTAATTTAAATACTTCTTTTTTTGATCCGGCTGGAGGAGGTGATCCTATTTTATATCAGCATCTGTTT
145	273	NCBI;cellular organisms;Eukaryota;Opisthokonta;Metazoa;Eumetazoa;Bilateria;Protostomia;Spiralia;Lophotrochozoa;Nemertea;	0	0	0	0	0	0	0	0	0	0	1	0	0	0	0	0	0	0	0	0	0	0	0	0	0	0	0	0	0	0	0	0	TTTATCGAGAAACGTTGCGCACGCTGGTGGGTCTGTTGATCTTGCTATTTTTTCTCTTCATCTCGCGGGGGTTTCTTCTATTTTGGGGGCAATTAATTTTATTACTACAATTATTAACATGCGCTGATACGGTATGCAGTTTGAGCGGCTTTCTTTGTTTGTTTGGTCTGTAAAAATTACTGCGGTTCTTTTACTTCTTTCTCTTCCTGTGTTAGCTGGGGCGATTACTATGCTTTTAACAGATCGAAATTTTAATACTTCTTTTTTTGATCCTGCTGGCGGTGGGGACCCTATTTTATATCAGCATTTGTTC
146	275	NCBI;cellular organisms;Eukaryota;Opisthokonta;Metazoa;Eumetazoa;Bilateria;Protostomia;Ecdysozoa;Panarthropoda;Arthropoda;	0	16	2	18	19	1	1	24	22	0	39	0	68	0	0	1	6	1	1	0	0	197	0	0	0	0	0	0	0	0	0	0	ATTATCTGGTATTCAAGCACACTCAGGTGGTTCTGTTGATGCTGCGATTTACTCTTTACATTTAGCGGGTGTTTCTTCAATCCTTGGTGCTATTAACTTTATTGTTACAATAACAAATATGCGTGCACCTGGAATGACTGCAAACCGTACACCTTTATTTGTTTGAGCAGTTTATATTACGGCTTTTTTACTTTTATTATCACTTCCTGTTTTAGCAGGTGCGATTACAATGTTATTAACAGACCGTAATTTTAACACTTCATTCTTTGATCCAAATGGAGGAGGTGACCCAGTTTTATATCAACATCTTTTC
147	277	NCBI;cellular organisms;Eukaryota;Opisthokonta;Metazoa;Eumetazoa;Bilateria;Protostomia;Spiralia;Lophotrochozoa;Nemertea;Palaeonemertea;Cephalotrichidae;Cephalothrix;	1	492	1	1	0	0	0	0	0	0	0	0	0	0	0	0	0	0	0	0	0	0	0	0	1	0	137	0	1	0	0	0	TTTGGCTGGTAACCTAGCACATGCTGGAGGATCGGTAGATTTGGCTATTTTTTCTTTACATTTAGCGGGTGTATCTTCAATTTTAGGTGCTATTAATTTTATTACTACAATTATTAATATGCGTTGGCGGGGTATATATTTTGAGCGTTTACCTTTATTTGTTTGATCAGTAAAAATTACTGCTATTTTGTTGCTTTTATCTTTACCTGTTTTAGCAGGAGCAATTACTATGTTATTAACAGATCGAAATTTTAATACGGCTTTCTTTGATCCTGCAGGTGGTGGGGATCCTATTCTCTATCAACATTTATTT
148	278	NCBI;cellular organisms;Eukaryota;Sar;Stramenopiles;Ochrophyta;PX clade;Phaeophyceae;	0	15	1	0	11	0	3	14	0	0	5	0	9	0	0	1	5	0	0	1	0	300	0	2	0	0	0	1	0	0	0	0	ATTAAGTTCTATTCAGGCACACTCAGGTCCATCTGTGGATCTAGCTATTTTTAGTCTGCACGTAAGCGGTGCGTCATCAATTTTA+AJ149GGTGCCATTAACTTCATCACTACCATTTTTAACATGCGTGCACCGGGTATGACCATGCACCGTTTACCATTAATGGTTTGGGCTGTTTTAATTACAGCATTCCTGTTATTGCTGTCACTGCCAGTATTAGCGGGAGCGATCACGATGCTCCTTACAGACCGTAATTTCAATACGACTTTCTTCGATCCTGCTGGTGGAGGTGATCCCGTATTGTATCAACATTTGTTC
149	279	NCBI;cellular organisms;Eukaryota;Opisthokonta;Metazoa;Eumetazoa;Bilateria;Protostomia;Ecdysozoa;Panarthropoda;Arthropoda;Mandibulata;Pancrustacea;Crustacea;Multicrustacea;Hexanauplia;Copepoda;Neocopepoda;Gymnoplea;Calanoida;Calocalanidae;Calocalanus;Calocalanus pavo;	0	0	0	0	0	0	0	0	0	0	0	1	249	0	1	0	0	0	0	0	0	171	0	1	0	0	0	0	0	0	0	1	TTTATCAAGAAACATTGCGCATGCTGGAAGCTCAGTAGATTTCGCCATTTTTTCTTTACATTTAGCAGGGGTCAGATCTATTTTAGGAGCTGTAAATTTTATTAGTACTTTAGGAAATCTTCGAGTATTTGGTATGCTATTAGACCGTATACCATTATTTGCTTGAGCCGTATTAATTACTGCAATCTTATTACTACTATCTTTACCTGTGTTAGCTGGAGCCATTACAATACTACTAACTGACCGTAATCTAAATACATCATTTTATGATGTTGGAGGAGGAGGAGACCCTATTTTATATCAACACCTATTT
150	280	NCBI;cellular organisms;Eukaryota;Sar;Alveolata;Dinophyceae;	9	51	209	364	22	0	0	0	0	0	2	0	0	1	3	1	248	0	44	0	286	10	4	22	1	0	558	1	0	0	0	0	ATTAAGCACTTCTTTCATGAGCTTATCACCTTCAAGTACAGGAAATCTTATCTTTGGTTTATTAATCTCTGGTATATCCTCATGTCTCACATCTCTTAATTTCTATACAACAATTCTAAATCTGAGATCTTATTATCTGAATTTAAAGACTATGCCATTATTCCCTTGGGCTCTCTTCATTACAGCAGGAATGCTTTTATTAACATTACCAATCTTATCAGGAGCTCTTCTAATGGTCTTGGCTGATCTTCATTCTAATACACTTTTCTTTGAACCAATCTTTGGAGGAGATCCTATATTCTATCAACACTTATTT
151	282	NCBI;cellular organisms;Eukaryota;Opisthokonta;Metazoa;Eumetazoa;Bilateria;Protostomia;Ecdysozoa;Panarthropoda;Arthropoda;Mandibulata;Pancrustacea;Crustacea;Multicrustacea;Hexanauplia;Copepoda;Neocopepoda;Podoplea;Poecilostomatoida;Corycaeidae;Farranula;Farranula gibbula;	0	0	107	1	0	0	38	0	0	37	924	363	0	0	19	1	0	2	0	0	0	38	0	0	1	121	0	0	0	0	0	0	CCTAAGCGGAAACCTTTCCCACTCAGGAGCTTCCGTAGACTACGCAATTTTCTCTCTTCACTTAGCAGGAGTTTCATCTTTGTTAGGAGCTGTGAATTTTATTAGCACTCTTAGAAATCTTCGAGTTTTTGGGATAATACTAGACCGTTTACCTCTATTCGCTTGAGCAGTTTTAGTTACTGCTATTTTACTTCTTCTTTCTTTACCAGTATTAGCTGGGGCTATCACTATGCTGCTCACTGACCGAAATTTTAATACGTCTTTTTACGACCCAAGAGGGGGAGGAGACCCACTTCTTTACCAGCACTTATTT
152	283	BOLD;Ochrophyta;79.29	0	0	2	0	0	0	0	0	1	0	0	1	0	0	0	0	122	0	22	1	9	0	441	38	1	0	422	0	0	0	0	0	TTATCAAGTGTTCAGGCACACTCTGGACCTTCTGTAGACTTAGCTATTTTCAGTTTACACTTAGCAGGTGCTTCTTCTATTATGGGTGCGGCAAACTTCATTACTACTATCCTTAATATGCGAGCTCCTGGTATTACTATGCACCGATTACCTCTTTTCGTATGGGCTGTATTTATTACTGTTATCCTACTTCTTCTTTCGCTACCTGTTCTTGCAGCAGCGATTACTATGTTATTAACAGACCGTAACTTTAATACTACTTTCTTCGACCCTGCTGGAGGAGGTGACCCTGTACTTTACCAGCACTTGTTC
153	286	NCBI;cellular organisms;Eukaryota;Sar;Stramenopiles;Ochrophyta;Bacillariophyta;	6	0	327	17	0	0	0	0	0	0	0	0	1	0	0	0	73	0	114	0	0	0	0	0	0	0	0	0	0	0	0	0	ACTTTCTAGTATTATTGCACATTCAGGTGGTTCAGTTGATTTAGCAATTTTTAGTTTACACGTTTCAGGTGCAGCTTCGATTTTAGGAGCAATTAACTTTATTTGTACAATTTTTAATATGCGTGTTAAAAGTTTATCTTTTCACAAACTACCATTATTTGTATGGGCAATTTTAATTACAGCAGTTTTGTTGTTACTATCATTACCAGTTTTGGCAGGAGCCATTACAATGTTATTAACTGATAGAAATTTTAATACAACATTTTTTGATCCTGCAGGTGGAGGTGATCCTGTTTTATATCAGCATTTATTT
154	290	NCBI;cellular organisms;Eukaryota;Opisthokonta;Metazoa;Eumetazoa;Bilateria;Protostomia;Spiralia;Lophotrochozoa;Mollusca;Bivalvia;Autobranchia;Pteriomorphia;Pterioida;Pinnoidea;Pinnidae;Atrina;	0	0	0	0	0	0	0	0	0	0	0	0	0	0	0	1	0	0	200	0	0	0	0	0	0	0	0	0	0	0	2	11	TTTATCTACAAGTGAATTTCATTCTGGTCCATCTGTAGATCTTGCAATTTTTAGTCTACATATTGCAGGTGCTTCTTCAATA+AJ155GCAGGTGCAATAAATTTTATTACTACTATCTTTAACTGTAGGTGCAGAGGTATGACTTTTGTACGTATGCCTTTATTCGTTTGGGCTGTTCTAATAACTGCTTTTTTGTTATTGCTTTCTTTACCGGTTTTAGCCGGTGGTATAACTATGTTGTTGACCGATAGAAATTTAGCAACTAATTTTTTTGATCCGGCAGGAGGAGGTGACATAATATTGTATCAACATTTATTT
155	291	BOLD;Arthropoda;Copepoda;88.35	8	45	35	8	4	0	0	5	0	0	12	0	12	0	0	13	27	0	37	0	0	94	5	5	0	0	0	1	9	0	0	0	TTTATCTTCTAAGACTGGTCAACCAGGACCAGCAATGGATTTAGCAATTTTAAGTTTACACGTTGCAGGAGCTTCATCAATTTTAGGGGCTATTAATTTTATAACTACAATTTTAAACATGAGAACTCCAGGCATGACATTACACAAGATGCCATTATTCTCTTGGTCTATATTAGTTACAGCATTTTTACTTTTATTATCATTACCAGTTTTAGCTGGAGCGATTACTATGCTTCTAACAGATAGAAACTTTGGAACGGCATTCTTTGAAGCACAAACAGGTGGTGATCCAGTTTTATTCCAGCACTTATTT
156	292	BOLD;Arthropoda;82.52	8	27	80	0	2	0	0	6	0	0	7	0	9	0	0	1	66	0	19	0	0	48	65	5	0	0	36	0	0	0	0	0	TTTATCTTCCAAGACAGGTCAACCTGGTCCAGCAATGGATTTGGCAATATTAAGTTTACACATCGCAGGAGCATCCTCAATTTTAGGTGCAATAAACTTTATAACTACAATCTTAAACATGAGAACCCCTGGAATGACACTACATAAAATGCCTTTGTTTGCCTGGTCCATTTTGGTTACAGCATTCCTACTTCTTTTATCTCTTCCAGTTTTAGCTGGTGCCATTACTATGCTGTTAACTGACAGAAATTTTGGAACCGCATTTTTTGAGGCACAAACAGGTGGTGATCCAGTTCTGTTTCAACACTTATTC
157	294	NCBI;cellular organisms;Eukaryota;Sar;Rhizaria;Imbricatea;Silicofilosea;Euglyphida;Paulinellidae;Paulinella;Paulinella micropora;	31	0	1	0	0	0	0	0	0	0	0	0	0	0	0	1	469	0	27	0	0	0	1	0	0	0	1	0	0	0	0	0	TTTATCTACAAGTGAATTTCATTCTGGTCCATCTGTAGATCTTGCAATTTTTAGTCTACATATTGCAGGTGCTTCTTCAATAGCAGGTGCAATAAATTTTATTACTACTATCTTTAACTGTAGGTGCAGAGGTATGACTTTTGTACGTATGCCTTTATTCGTTTGGGCTGTTCTAATAACTGCTTTTTTGTTATTGCTTTCTTTACCGGTTTTAGCCGGTGGTATAACTATGTTGTTGACCGATAGAAATTTAGCAACTAATTTTTTTGATCCGGCAGGAGGAGGTGACATAATATTGTATCAACATTTATTT
158	295	NCBI;cellular organisms;Eukaryota;Opisthokonta;Metazoa;Eumetazoa;Bilateria;Protostomia;Spiralia;Lophotrochozoa;Mollusca;Bivalvia;Autobranchia;Heteroconchia;Euheterodonta;Imparidentia;Lucinida;Lucinoidea;Lucinidae;	0	0	0	0	0	1	1	0	0	0	0	2	0	0	540	0	0	0	0	0	0	0	0	0	0	0	0	0	0	0	0	0	TTTAAGGGCTATTATGCAGCACTCTGGTCCGGCTGTTGATATAACTATTTTTTCTTTGCATTTGGCAGGTTTGTCTTCTATTTTGGGGGCTATTAATTTTTATTCTACTATTTATAATATACGCCCTGATGGTATTAGGCTTGGACGTTTAGGATTGTTTCCTTGGTCAATTATGGTTACTGCTGTTTTATTAATTTTAGCTGTGCCTGTATTGGCGGGTGCCTTGACTATGTTATTATTAGACCGTCATTTTAATACTACGTTTTTTGATCCTGTAGGTGGTGGAGATCCTGTGCTATTTGAGCACTTGTTC
159	296	NCBI;cellular organisms;Eukaryota;Opisthokonta;Metazoa;Eumetazoa;Bilateria;Protostomia;Ecdysozoa;Panarthropoda;Arthropoda;Chelicerata;Pycnogonida;Pantopoda;Phoxichilidiidae;Anoplodactylus;Anoplodactylus erectus;	0	0	0	0	0	0	0	0	0	0	0	0	0	0	0	0	0	0	0	0	1	0	1	0	2	542	0	0	0	2	0	0	TTTATCTTTTAACATTTCTCATGCAGGTGCTTCTGTAGATATAGTAATTTTTTCTTTACATATAGCAGGTATTTCTTCTATTCTAGGAGCAATTAATTTTATTACAACAATTATTAATATACGTGTTAAATCTTTAACATTTGAAAAATTACCTTTATTTGTATGAAGAGTATTTATTACAGCTATTCTTTTACTACTATCTTTACCTGTTTTAGCTGGAGCAATTACAATACTATTAACAGATCGAAATTTTAACACTTCTTTTTTTGACCCAAGAGGAGGAGGAGACCCTATTTTATACCAACATTTATTT
160	299	NCBI;cellular organisms;Eukaryota;Eukaryota incertae sedis;Picozoa;unclassified Picozoa;Picobiliphyte sp. MS584-11;	0	0	1	0	0	120	0	0	0	0	0	0	0	0	0	0	9	0	3	11	0	0	204	5	0	0	87	0	204	0	0	0	ACTTGCTTCAATTTCATTTCATTCAGGAGGGGCAGTTGATTGTGCCATTTTTGCTCTTCACGTAGCAGGAGCTTCTTCGATTCTTGGAGCCGTTAACTTTATTACAACTGTTTTAAACATGCGAGCCCCTGGAGTTTCTTTACATCGAATGCCTTTATTCGTATGAAGTATCTTCGTAATGTTGTTCTTCTTTTATTAGCAGTACCTGTACTTGCAGGAGCTATTACTATGCTATTAACAGATCGAAATTTTAATACAACTTTCTTTGATCCTGCTGGAGGGGGAGATCCTGTACTTTATCAGCATCTTTTC
161	300	NCBI;cellular organisms;Eukaryota;Opisthokonta;Metazoa;Eumetazoa;	14	54	230	0	16	0	3	168	0	1	215	2	29	0	0	117	81	1	19	0	0	243	69	49	0	0	0	0	2	0	0	41	TTTGAGTTCCATTACCGGACATAGTTCTCCTGCTGTTGATATGGCTATTTTTTCACTTCACTTAGCTGGAGCTTCTTCAATATTGGGTGCAGTAAACTTTATTACTACAATTCTAAATATGAGAGCACCTGGAATGACTCTTCATAAAATGCCTTTATTTGCCTGGTCTATGTTAGTAACTGCTTTTCTACTTCTTTTAGCCGTTCCTGTATTAGGTGGAGCTATAACTATGCTTTTAACTGACAGAAATTTCGGAACAACATTTTTCGATCCAGCCGGTGGAGGAGACCCCGTTCTTTTCCAACACCTTTTC
162	301	NCBI;cellular organisms;Eukaryota;Sar;Stramenopiles;Ochrophyta;Bacillariophyta;Mediophyceae;Biddulphiophycidae;Eupodiscales;Odontellaceae;Odontella;Odontella regia;	0	23	147	3	0	0	0	0	0	0	0	0	0	0	3	1	5	0	29	0	0	6	1	0	0	0	0	0	0	0	0	0	TCTTTCTAGTGGTACTTCACATTCAGGTGGAGCTGTAGATTTAGCAATTTTCAGTTTACATTTATCAGGAGCATCATCAATTTTAGGTGCGATTAATTTTATATGTACAATTTTTAACATGAGAGTAAAAAGTTTAGCATTTCATAAATTACCACTATTTGTTTGGGCTGTTTTAATTACAGCTTTTTTATTGTTATTATCACTACCAGTTTTAGCAGGTGCTATTACTATGCTTTTAACAGATAGAAATTTCAATACAACTTTTTTTGATCCAGCTGGAGGAGGTGATCCTGTTTTATACCAACATTTATTT
163	304	NCBI;cellular organisms;Eukaryota;Sar;Stramenopiles;Ochrophyta;PX clade;Phaeophyceae;Ectocarpales;Chordariaceae;	14	0	24	34	0	1	1	2	0	0	3	0	7	2	0	0	613	0	12	0	0	0	105	16	1	0	27	2	0	0	0	0	CTTGAGTAGCGTAAGTGGTCATTCCGGCCCATCTGTAGATTTGGCTATCTTTAGTCTGCACCTTTCTGGTGCGGCGTCGATTATAGGTGCTATTAACTTTATTACTACTATTATAAACATACGACCAAAAGGAATGGAAATGCATAGATTGCCTCTGTTCGTTTGGGCTGTATTGATTACAGCTGTTCTCCTTCTTCTTTCTCTTCCTGTTTTGGCAGGGGGTATTACTATACTTCTAACTGATAGAAATTTTAATACTACTTTCTTTGATCCAGCAGGAGGGGGTGACCCTGTTCTTTATCAACATCTTTTC
164	306	BOLD;Cnidaria;75.11	15	414	60	5	0	0	0	0	0	0	0	0	90	1	0	80	144	1	16	0	0	655	0	0	1	1	0	0	1	0	0	58	TCTGTCAAGCTCGGCAGGTTCTCCAGGTATGGGTATGGACCTTGCAATATTTTCGCTACATTTAGCAGGCGCATCTTCTATTTTGGGTGCGGCAAATTTTATAACAACGATATTTAACATGAGGGCACCTGGAATGACACTTCACAAAATGCCATTGTTTGTTTGGTCTATGCTAGTTACAGTATTTTTGTTATTATTAGCTATACCTGTTTTGGCTGGCGCCATTACAATGTTACTTACTGATAGAAATTTTGGAACAAGTTTTTTCATTCCTGAAGGTGGTGGTGATCCAATATTATTTTTACACCTTTTT
165	307	NCBI;cellular organisms;Eukaryota;Sar;Stramenopiles;Ochrophyta;Bacillariophyta;Coscinodiscophyceae;Thalassiosirophycidae;Thalassiosirales;	15	7	464	16	0	0	0	0	0	0	0	0	2	0	2	0	262	0	72	0	0	0	8	1	0	0	0	0	0	0	0	0	ATTATCAAGTGCAACAGCTCATTCTGGAGGATCTGTAGATTTAGCAATATTTAGTTTACATTTATCTGGTGCATCTTCTATTTTAGGAGCAATAAACTTTATTTGTACAATTTTTAACATGCGAGTAAAAAGTTTATCTTTTCATAATCTTCCTTTATTTGTATGATCTGTTTTGATCACAGCATTTTTATTATTATTATCTTTGCCTGTTTTGGCAGGCGCAATCACAATGTTGTTAACAGATAGAAATTTTAACACAACTTTTTTTGATCCTGCTGGTGGTGGTGATCCTGTGCTGTTTCAACATCTTTTT
166	308	NCBI;cellular organisms;Eukaryota;Opisthokonta;Metazoa;Eumetazoa;	0	0	0	0	0	0	0	0	0	0	0	0	0	0	0	0	0	0	0	0	0	0	308	17	1	0	217	3	1	1	0	0	ATTATCAAGTGTATTAGGACATTCTGGTCCTTCTGTAGATTTAGCTATTTTCAGTTTACACGTAGCTGGTGCTTCATCAATTATGGGAGCAGTTAATTTTATTACAACAATCTTAAATATGAGAGCACCAGGTTTAACTATGCATAGAATGCCATTATTTGTATGATCTGTTTTAATTACAGCAGTTCTACTTTTATTATCTTTACCAGTATTAGCTGGGGCTATTACTATGTTACTAACAGACAGAAATTTTAATACATCTTTTTTCGACCCAGCAGGAGGAGGAGATCCGATTTTATATCAACATTTATTT
167	310	NCBI;cellular organisms;Eukaryota;Sar;Stramenopiles;Ochrophyta;Bacillariophyta;Bacillariophyceae;Bacillariophycidae;Bacillariales;Bacillariaceae;Pseudo-nitzschia;	2	2	0	0	0	0	0	0	0	0	0	0	0	0	0	2	40	0	0	0	0	0	0	0	0	0	0	0	0	0	0	0	TCTTTCAAGTGTTCTTTCTCACTCAGGAGGTTCAGTTGATTTAGCAATTTTTAGTCTTCACTTATCGGGAGCAGCTTCAATTTTAGGTGCAATTAACTTTATCTGTACCATTGTAAATATGAGAACTGAAAGTCTACCATTCCACAAACTTCCTCTGTTTGTTTGGTCTGTTTTCATCACTGCAATTCTATTACTATTGTCATTACCTGTTTTAGCAGGAGCAATTACAATGTTATTAACTGATAGAAATTTCAACACTACTTTTTTTGATCCTGCTGGTGGAGGAGACCCTGTACTTTTCCAGCACTTGTTC
168	312	NCBI;cellular organisms;Eukaryota;Rhodophyta;Florideophyceae;Rhodymeniophycidae;	0	0	1	0	0	0	0	0	0	0	0	0	0	0	0	0	2	0	0	0	0	0	411	36	0	0	39	0	11	0	0	1	TCTGTCTGCTAAATTGGGGCATGCAGGACCTTCTGTTGATATGGCTATCTTCGCTTTACATTTAGCTGGAGCATCGTCAATATTAGGAGCAGTTAATTTTATTACCACAATACTAAATATGCGTACTCCAGGTATGACTTTACATAAAATGCCATTATTTATATGGTCTATGCTTGTAACTGCTTTTTTATTATTGTTAGCTGTTCCAGTTTTAGCAGGAGCTATCACTATGTTGTTAACTGATAGAAATTTTGGTACTACATTTTTTAATCCAGCAGGTGGTGGAGACCCAGTATTGTTCCAACATTTATTT
169	315	NCBI;cellular organisms;Eukaryota;Sar;Stramenopiles;Ochrophyta;Bacillariophyta;Coscinodiscophyceae;Rhizosoleniophycidae;Rhizosoleniales;Rhizosoleniaceae;Guinardia;Guinardia delicatula;	0	19	5	9	0	0	0	0	0	0	0	0	0	0	0	1	0	0	0	0	0	66	0	0	0	0	0	0	0	0	0	0	TCTATCTAGTGGTAATTCTCATTCTGGTGCTTCAGTTGATTTAGCTATTTTTAGTTTACATTTATCAGGTGCAGCTTCCATTTTAGGTGCTATTAATTTTATATGTACTATATTAAATATGAGAGTCAAAGGATTATTTATGCATAGATTACCCCTATTTGTATGGGCTATTTTAATTACTGCTGTATTACTTCTATTATCTTTACCTGTTTTAGCAGGTGCTATTACTATGTTACTAACAGACCGAAATTTTAATACTACCTTTTTTGATCCTGCAGGAGGAGGAGATCCTGTATTATATCAACACTTATTT
170	318	NCBI;cellular organisms;Eukaryota;Sar;Stramenopiles;Ochrophyta;Bacillariophyta;	0	0	0	0	0	1	0	0	0	0	263	0	0	0	0	0	0	0	0	0	0	0	0	0	0	0	154	0	1	0	0	0	ATTATCTAGTATTGTTTCTCATTCTGGAGGATCAGTTGATTATGCTATATTTAGTCTGCATTTATCAGGAGCAGCATCTATCTTAGGTGCAATAAATTTCATTTGTACAATTATGAATATGAGAGCTGAAAGTGTACCATTTCATAAATTACCTTTATTTGTATGGTCGATTTTCATAACAGCATTCTTATTATTACTTTCATTGCCGGTTTTAGCAGCAGCAATAACCATGCTTTTAACAGATAGAAATTTCAATACTACCTTTTTTGATCCAACTGGGGGAGGAGATCCAATTCTATTTCAACATTTATTT
171	322	BOLD;Heterokontophyta;85.76	0	2	0	0	0	0	0	0	0	0	0	0	0	0	0	0	6	0	0	0	0	0	0	0	0	0	0	0	0	0	0	0	ATTATCTAGTGGTAATTCTCATTCAGGTGCTTCTGTTGACTTAGCTATTTTTAGTTTACACTTATCAGGTGCTGCTTCTATTTTAGGTGCTATTAATTTTATTTGTACTATTTTAAATATGCGTGTTAAAGGTTTATTTATGCATAGATTACCTTTATTTGTTTGGTCAATTTTAATTACTGCTGTTTTATTATTACTATCATTACCTGTATTAGCTGGTGCTATTACTATGTTATTAACTGATAGAAATTTTAATACAACTTTTTTTGATCCTGCTGGTGGTGGTGATCCTGTATTATATCAACATTTATTT
172	323	NCBI;cellular organisms;Eukaryota;Opisthokonta;Metazoa;Eumetazoa;Bilateria;Protostomia;Ecdysozoa;Panarthropoda;Arthropoda;Mandibulata;Pancrustacea;Crustacea;Multicrustacea;Hexanauplia;Copepoda;Neocopepoda;Podoplea;Harpacticoida;Miraciidae;Macrosetella;Macrosetella gracilis;	0	0	0	1	0	0	1	1	0	0	0	2	1	0	573	0	0	0	0	0	0	0	0	0	0	0	0	0	0	0	0	0	TTTAAGAAGCAATTTAGCGCATAGGGGTGCCTCTGTTGATTTAGCAATTTTTTCGTTACATTTAGCAGGAATCTCTTCCCTACTAGGAGCAGTAAATTTTATTACAACTTTATTAAATTTACGTTTATTTAATATAGGTTTAGAAAATATTTCGCTTTTTGGATGATCTGTATTTATTACAGCAATTTTACTACTATTATCTCTTCCAGTATTAGCCGGGGCTATCACGATGTTACTGACAGACCGAAATCTTAATTCTACTTTTTATGATGTGAGAGGTGGAGGAGACCCTGTTTTATACCAACATTTGTTT
173	324	BOLD;Cnidaria;78.03	12	17	115	9	0	0	0	1	0	0	9	0	3	0	0	23	62	0	63	0	0	33	15	6	0	0	0	0	7	0	0	12	TTTATCAGCTTCACTTGGAGCTCCAGGACCTGCCGTAGATTTAGCAATTTTCTCTCTGCATATAGCTGGTGCGTCTTCAATACTTGGTGCTATAAATTTTATTACGACAATATTTAATATGAGAGCACCAGGAATGACATTACATAAAATGCCTTTATTTGTATGGTCAATTTTAGTAACTGCATTCCTACTTTTACTATCTCTTCCTGTCTTAGCTGGCGCGATCACAATGCTTCTAACAGATAGAAATTTTGGCACAGCTTTTTTCGAGCCTTCAATGGGAGGTGATCCTGTTTTATTCCAGCATTTATTC
174	325	NCBI;cellular organisms;Eukaryota;Sar;Stramenopiles;Ochrophyta;Bacillariophyta;	13	0	297	0	0	0	0	0	0	0	0	0	0	0	0	0	48	0	200	0	0	0	2	0	0	0	0	0	0	0	0	0	ATTATCAAGTATTATTGCTCACTCAGGTGGTTCTGTTGATTTAGCAATTTTCAGTTTACATGTTTCAGGTGCAGCTTCGATTTTAGGTGCAATTAATTTTATTTGTACTATTTTTAACATGCGTGTTAAAAGTTTATCTTTTCATAAATTACCGTTGTTCGTGTGGGCTATTTTAATTACTGCAGTTCTATTATTACTATCATTGCCAGTTTTAGCAGGAGCTATTACAATGTTATTAACTGATAGAAATTTTAACACAACATTTTTTGATCCTGCAGGTGGAGGTGATCCTGTTTTATATCAACATTTATTT
175	326	NCBI;cellular organisms;Eukaryota;Opisthokonta;Metazoa;Eumetazoa;Cnidaria;Hydrozoa;Hydroidolina;Leptothecata;Aglaopheniidae;Aglaophenia;Aglaophenia prominens;	0	111	8	2	0	0	0	1	0	0	0	0	41	0	0	3	7	0	5	0	0	90	0	3	0	1	5	0	0	0	0	1	TCTATCTTCTAAGACAGGTCAACCAGGACCAGCAATGGATTTAGCAATCTTAAGTTTACATGTAGCCGGGGCCTCCTCTATTTTAGGAGCAATAAATTTTATCACTACTATTTTAAATATGAGAACACCTGGTATGACTTTGCATAAAATGCCATTATTCTCATGGTCTATATTAGTGACAGCGTTTTTACTTTTATTATCTTTACCGGTTTTAGCTGGAGCAATCACAATGCTTTTAACAGATAGAAACTTTGGAACTGCTTTCTTTGAAGCACAAACAGGTGGAGATCCAGTCCTATTCCAACACTTATTT
176	329	BOLD;Rhodophyta;80.52	27	86	65	0	1	0	0	15	0	0	11	0	45	0	0	0	233	0	24	1	0	96	16	12	0	0	3	0	0	0	0	0	TCTTTCAAGTAATTTGGGACATTCAGGTCCTGCTGTTGACATGGCTATATTAAGTTTACATTTGGCAGGAGCTTCATCTATTCTAGGAGCAATAAATTTCATTACTACTATTTTTAATATGAGAACTCCTGAGATGACATTGCATAGAATGCCTTTATTTGTCTGGTCTATTTTGGTTACAGTCTTTTTATTAGTATTATCTTTACCCGTGTTAGCGGGAGCAATTACAATGCTTTTGACAGATCGTAATTTTGGAACGGCATTTTTTGCACCAGAGGGAGGTGGTGACCCTATTTTATTTCAGCATTTATTT
177	331	NCBI;cellular organisms;Eukaryota;Opisthokonta;Metazoa;Eumetazoa;Bilateria;Protostomia;Ecdysozoa;Panarthropoda;Arthropoda;Mandibulata;Pancrustacea;Crustacea;Multicrustacea;Hexanauplia;	0	0	0	0	0	0	0	0	0	0	0	0	0	0	0	0	0	0	0	0	477	0	2	0	1	1	0	0	1	0	0	4	TCTAAGGAGAAATTTAGCGCACTCAGGGCCGTCGGTGGATTTTGCTATTTTTTCTTTACATCTTGCAGGAGTATCCTCCCTTTTAGGCGCTGTTAACTTTATTAGAACTTTTGGTAACCTACGCAGGTTGGGTATAGAGCTGGATCAAACTCCTTTATTCACTTGATCAGTGTTAGTAACAACAATTTTACTTCTTTTATCCTTGCCAGTTTTAGCCGGGGCTATTACTATGCTTTTAACAGATCGGAATATTAATACATCATTTTATGATTCTGGGGGTGGGGGAGACCCAATTCTTTATCAACATTTATTT
178	332	NCBI;cellular organisms;Eukaryota;Sar;Stramenopiles;Ochrophyta;Eustigmatophyceae;Eustigmatales;Monodopsidaceae;Nannochloropsis;	67	1	9	12	3	0	49	17	1	0	218	12	0	2	1	0	66	0	1	0	0	0	0	0	0	5	0	0	0	0	0	0	ACTATCTAGTGTTCAGGCACACTCTGGACCTTCTGTAGACTTAGCGATCTTTAGTCTTCACTTAGCGGGTGCTTCATCGATTATGGGTGCGGTAAACTTTATTACCACTATTCTAAATATGCGAGCTCCTGGTATCACTATGCATCGATTACCTCTATTCGTGTGGGCAATCTTCATTACTGTTATCCTGTTACTACTTTCTTTACCTGTTCTTGCAGCAGCGATTACTATGTTATTAACAGATCGTAACTTCAACACTACCTTTTTCGATCCAGCTGGAGGAGGAGACCCTGTACTGTACCAGCACCTATTC
179	334	NCBI;cellular organisms;Eukaryota;Sar;Stramenopiles;Ochrophyta;Bacillariophyta;Coscinodiscophyceae;Thalassiosirophycidae;Stephanodiscales;Stephanodiscaceae;Cyclotella;Cyclotella cryptica;	0	0	0	0	0	0	0	0	0	0	0	0	0	0	0	0	1	0	0	0	0	398	0	0	0	0	0	0	0	0	0	0	TTTATCTAGTGGTAGCTCTCATTCAGGAGGTGCCGTAGATCTTGCTATATTCAGTCTACATTTATCTGGAGCTTCATCTATTTTAGGTGCTATCAATTTTATTTGTACTATATTTAATATGAGAGTTAAAAGTTTATCTTTTCATAAAATGCCTTTATTTGTATGGGCTGTTTTAATAACCGCTTTTTTGTTGTTGTTATCATTGCCTGTACTTGCAGGAGCGATTACTATGTTGTTAACTGACAGAAATTTTAACACTACATTCTTTGATCCTGCTGGAGGTGGAGACCCAGTTCTTTATCAACATTTATTT
180	336	NCBI;cellular organisms;Eukaryota;Sar;Stramenopiles;Ochrophyta;	9	0	1	239	24	0	134	29	27	2	61	1	0	2	66	0	0	0	1	0	0	1	11	1	0	1	3	0	0	0	0	0	TTTAAGTAGTGTTCAAGCTCATTCAGGTCCTTCTGTAGATTTAGCTATTTTTAGTTTACATTTATCAGGAGCATCATCTATTCTTGGAGCAATTAATTTTATTACAACAATTTTTAATATGAGAGCTCCAGGGATGACAATGCATAGATTGCCATTGTTTGTATGAGCTGTTCTAATTACAGCTTTCTTATTACTTCTATCTTTACCAGTATTAGCTGGGGCAATTACAATGTTGCTTACAGATAGAAACTTTAATACAACATTCTTCGATCCTTCGGGAGGTGGAGATCCGGTGCTTTATCAGCATCTTTTC
181	337	NCBI;cellular organisms;Eukaryota;Sar;Stramenopiles;Oomycota;	9	0	109	107	24	0	6	7	0	2	13	6	0	0	3	0	62	0	40	1	8	3	0	0	0	6	0	0	0	0	0	0	ATTATCAAGTGTTCAAGCTCACTCAGGTGGTTCTGTTGATTTAGCTATTTTCAGTTTACACTTATCTGGTATGTCTTCAATCTTAGGTGCTGTAAACTTTATTACAACCATTCATAATATGAGAAGTCCTGGTATGTCATACCACAGATTACCTTTATTTGTTTGGTCTGTTTTAATTACTGCTGTATTATTATTATTATCATTACCTGTATTAGCAGCTGCTATTACTATGTTATTAACTGATAGAAATTTAAATACTGCTTTCTTTGACCCATCTGGTGGTGGTGATCCTGTATTATACCAACATTTATTT
182	338	BOLD;Arthropoda;Copepoda;88.47	0	11	33	0	0	0	0	0	0	0	0	0	8	0	0	0	9	0	2	1	0	20	63	2	0	0	11	0	2	0	0	0	TTTGTCATCAAAGACAGGTCAACCAGGACCAGCAATGGATTTAGCAATCTTAAGTTTACACATAGCAGGAGCTTCTTCTATTTTAGGAGCAATTAATTTTATAACTACTATTTTAAATATGAGAACACCGGGCATGACTTTACATAAAATGCCACTATTCTCTTGGTCAATACTAGTAACAGCATTTTTACTTTTGTTGTCGTTGCCAGTTTTAGCAGGAGCAATCACAATGCTTCTAACGGATAGAAATTTTGGAACTGCCTTCTTCGAAGCTCAAACAGGAGGAGATCCAGTTCTATTCCAACACCTATTT+AJ183
183	339	NCBI;cellular organisms;Eukaryota;Viridiplantae;Chlorophyta;Chloropicophyceae;Chloropicales;Chloropicaceae;Chloroparvula;Chloroparvula japonica;	14	0	8	52	0	0	10	6	113	0	66	0	0	0	4	0	39	0	3	0	25	0	2	17	0	5	1	0	10	0	0	0	TCTAAGTAGCATTGCTGCGCACTCTGGAGGTTCAGTAGACTTGGCTATCTTTAGTCTTCACGTATCAGGTGCTAGTAGTATTTTGGGGGCTATTAATTTTATTACTACTATTTTCAACATGCGCGGACCGGGTATGACCATGCACCGTTTGCCTCTATTCGTATGGTCTGTATTGATTACCGCATTTTTGCTTTTGCTTTCACTACCAGTTCTAGCCGGTGCAATTACTATGCTTTTGACTGATCGTAACTTTAATACTTCTTTCTTCGACCCAGCGGGTGGAGGGGACCCTATCTTGTACCAGCATTTGTTC
184	340	NCBI;cellular organisms;Eukaryota;Opisthokonta;Metazoa;Eumetazoa;Bilateria;Protostomia;Ecdysozoa;Panarthropoda;Arthropoda;	0	0	0	0	0	0	0	0	0	0	493	0	0	0	0	0	0	0	0	0	0	0	0	0	0	0	0	0	0	0	0	0	TTTAAGAAGAGGAATTGCCCACGCTGGAGCGTCAGTAGATTTTGCTATTTTTTCTTTGCACTTAGCAGGGGTTTCATCATTACTTGGGGCGGTTAATTTTATTAGGACATTGGCTAATCTCCGGGTCATGGGAATATTTTGAGATCAAATATCTTTATTTTCTTGATCTGTTTTAATTACAGCAGTTCTTTTATTACTTTCTCTTCCAGTACTAGCAGGGGCTATTACTATATTGTTAACTGATCGAAATTTGAACACTTCTTTTTATGATCCAAGTGGAGGAGGGGATCCTATTTTGTATCAGCACCTATTT
185	342	NCBI;cellular organisms;Eukaryota;Sar;Stramenopiles;Ochrophyta;Bacillariophyta;Coscinodiscophyceae;Rhizosoleniophycidae;Rhizosoleniales;Rhizosoleniaceae;	40	0	151	83	0	0	0	0	0	0	0	0	0	0	0	0	146	0	29	0	0	0	0	0	0	0	0	8	0	0	0	0	TTTATCAAGTATAAATTCACACTCAGGAGCTTCTGTAGACTTAGCAATTTTTAGTTTACATTTATCAGGAGCTGCTTCAATTTTAGGCGCTATTAATTTTATTTGTACTATATTTAATATGCGTGTAAAAGGTTTATATATGCATTTGTTGCCGTTATTTGTTTGGTCAGTTCTTATTACTGCTTTTTTATTATTATTGTCATTGCCTGTATTAGCAGGAGCAATTACTATGCTATTAACAGACCGTAATTTTAATACAACATTTTTTGATCCTGCTGGTGGCGGTGACCCCGTATTATTCCAGCATTTATTT
186	343	BOLD;Cnidaria;77.22	0	0	0	0	0	9	0	0	0	0	0	0	0	0	0	0	0	0	0	0	1	0	0	0	0	0	0	0	849	2	0	0	GTTGAGTTCCAAGTTAGGACATCCTGGGAATTCAGTTGATTTCTTAATCCTAGGCATACACCTACTAGGTGCCTCCTCAATTTTAGGAGCAATAAATTTTATTACTACAATATTTAATATGCGTGCCCCTGGAATGACATTGCATAAAATGCCTTTATTTGTTTGGGCAATTTTAGTTACAGTTTTTTTATTACTTTTATCTCTTCCTGTCCTTGCAGGAGGAATTACCATGCTTTTAACAGATAGAAACTTTGGAACAAGTTTTTTTAATCCAGCAGGGGGAGGAGATCCAATTTTATTCCAACATCTTTTC
187	344	BOLD;Cnidaria;82.03	0	0	0	0	0	0	0	0	0	0	0	0	0	0	0	0	0	0	0	0	0	0	1	0	0	0	0	0	435	0	0	0	TTTATCATCTTCTATAGCCCATGCAGGAGCTTCAGTTGATTATGCTATATTTAGTTTACATATGGCTGGAATATCTTCTATAGCAGGTGCTGCAAATTTTATAGTAACAATTATAAATATGCAATGTTTAGGTATGACTAATTCTAAGTTACCTTTATTTGTTTGAGCTGTTTTTGTAACTGTTATATTACTATTACTATCTCTTCCAGTTTTAGCAGGAGCTATTACAATGCTTTTAGTTGATAGAAATTTTAATGGTAATTTTTTTGAAGTAGAAGGGGGAGGTGATCCTGTTTTGTATCAACATTTGTTT
188	345	NCBI;cellular organisms;Eukaryota;Opisthokonta;Metazoa;Eumetazoa;Bilateria;Protostomia;	0	230	1	0	0	0	0	0	0	1	0	7	0	0	1	0	0	0	1	0	0	0	0	0	0	0	0	0	0	0	0	0	ATTATCATCTTCAATAGCTCATGCAGGTTCTTCAGTAGATTTTGCAATATTTAGTTTACATATTGCTGGTATATCTTCAATTGGTGGATCTATTAATTTTATAGTTACTATTTTAAATATGAAATGTTTAGGTATGGATAATTCTAAAATGCCTTTATTTGTTTGAAGTGTTTTAGTGACAACTATATTATTATTGTTATCTTTACCTGTTTTAGCTGGAGCAATTACTATGCTTTTAGTTGATAGAAATTTCAATGGTAATTTTTTTGAAGTAGAAGGTGGTGGTGACCCTGTATTGTATCAACATTTATTT
189	347	NCBI;cellular organisms;Eukaryota;Opisthokonta;Metazoa;Porifera;Demospongiae;Heteroscleromorpha;	1	50	37	1	0	0	0	0	0	0	6	0	5	0	0	0	21	0	34	0	0	9	37	3	0	0	50	0	4	0	0	1	TTTGTCATCTAAAGCTGGTCAACCTGGACCTGCAATGGACTTAGCAATTTTAAGTTTACACTTAGCTGGAGCTTCTTCAATCTTAGGTGCTGTTAACTTTATTACCACAATTCTTAATATGAGAACTCCAGGTATGACATTACATAAAATGCCATTATTCGCTTGGTCAATTTTAGTGACTGCTTTTTTATTGTTGTTATCTTTACCGGTGCTTGCTGGAGCAATAACAATGCTTTTAACAGATAGAAACTTTGGAACTGCTTTTTTTGAAGCTCAAACTGGTGGTGATCCCGTATTGTTTCAACACTTGTTT
190	349	NCBI;cellular organisms;Eukaryota;Opisthokonta;	14	0	123	0	0	0	0	0	0	0	0	0	0	0	0	0	176	0	81	2	0	2	0	0	0	0	0	0	0	0	0	0	ATTATCTGGACTTACTGGACATAATACAGTAGCCATAGATTATGCTATATTTAGTTTACATTTAGCTGGGGTTTCTTCTATAGCAGGTGCTATAAATTTTATAGTTACCATCTCTAATATGAGATCTCGTGGAGTTAAAAGGTTAGATATGCCACTATTTTGTTGAGCTGTTTTTATAACTGCGTATTTATTATTGTTGTCTTTACCAGTATTAGCTGGAGCGATTACTATGTTACTAACAGATCGTATCTGTTATACAAATTTTTTTGTCCCTGAAGGGGGAGGTGATCCTATATTATTTCAACATTTATTT
191	350	NCBI;cellular organisms;Eukaryota;Opisthokonta;Metazoa;Eumetazoa;Bilateria;Deuterostomia;Chordata;Craniata;Vertebrata;Gnathostomata;Teleostomi;Euteleostomi;Actinopterygii;Actinopteri;Neopterygii;Teleostei;Osteoglossocephalai;Clupeocephala;Euteleosteomorpha;Neoteleostei;Eurypterygia;Ctenosquamata;Acanthomorphata;Euacanthomorphacea;Percomorphaceae;Eupercaria;Perciformes;Serranoidei;Serranidae;Anthi…	0	0	0	0	0	0	0	0	0	0	0	0	0	0	0	0	0	0	0	0	0	0	0	0	0	0	449	0	1	0	0	0	TCTAGCTGGTAACTTAGCCCACGCAGGAGCATCAGTTGACCTTACAATCTTCTCTCTTCATTTAGCAGGCATTTCCTCCATTTTAGGGGCCATCAACTTTATCACCACCATTATTAACATAAAACCCCCCTCTATTTCTCAGTACCAAACACCGTTATTTGTGTGAGCTGTTTTAATTACTGCCGTCCTCCTTCTTCTGTCACTCCCAGTCCTAGCTGCAGGCATTACAATGCTTCTTACGGACCGAAATCTAAACACCTCCTTCTTTGACCCCGCAGGAGGGGGGGACCCCATCCTTTACCAACACCTATTC
192	351	NCBI;cellular organisms;Eukaryota;Opisthokonta;Metazoa;Porifera;Demospongiae;Keratosa;Dictyoceratida;Dysideidae;Dysidea;	1	21	9	3	0	0	0	0	0	0	4	0	5	0	0	243	5	0	1	0	0	10	82	7	1	0	11	0	3	0	0	445	TCTAAGTTCAATTACTGGTCACAGTTCTCCTGCTGTAGATATGGCAATATTCTCTTTACACTTAGCGGGAGCATCTTCAATTCTTGGAGCTGTGAATTTTATTACGACAATATTAAATATGAGAGTTCCTGGCATGACACTTCATAAAATGCCTTTGTTTGCTTGGGCAATGTTGGTGACAGCATTTTTATTATTACTGGCTGTTCCAGTTTTAGGAGGCGCTATCACTATGCTCTTAACTGATAGAAACTTTGGTACTACCTTCTTTGATCCAGCAGGCGGCGGTGATCCAGTTTTATTTCAACATCTTTTT
193	352	BOLD;Porifera;Demospongiae;80	0	32	13	0	0	0	2	0	0	0	0	0	9	0	0	0	24	0	12	0	0	7	14	2	0	0	0	0	0	0	0	11	TCTTTCTAGTAATTTAGGTCATTCAGGGCCAGCAGTGGATATGGCAATTTTAAGTCTTCATTTAGCAGGGGCATCTTCTATATTAGGAGCTATTAACTTTATCACTACTATATTTAATATGAGAACACCTGAAATGACTTTACACAGAATGCCATTATTTGTTTGGTCTATTCTTGTAACTGTTTTTTTATTAGTTTTGTCATTGCCGGTATTAGCTGGGGCTATTACCATGCTATTAACGGATAGAAACTTTGGTACTGCTTTTTTTGCTCCAGAAGGTGGAGGTGACCCTATTTTGTTTCAACATTTGTTC
194	354	NCBI;cellular organisms;Eukaryota;Opisthokonta;Metazoa;Eumetazoa;Bilateria;Protostomia;Ecdysozoa;Panarthropoda;Arthropoda;	1	0	340	0	0	0	0	0	1	0	0	0	0	0	0	0	0	0	0	0	0	0	0	0	0	0	0	0	0	0	0	0	TTTAAGAAGAAAAAATTTTCACAATTCTTTTGCAGTAGATTTTGCTATTTTTAGTCTTCATTTAGCTGGAATTTCTTCTCTTATTGCTTCTTTAAATTTTGTAATGACAAGACTAAGTTATAAAAATTTTAATAATAGTCTTATCAACACTTCTCTTTTTATTTGATGTATAGTAGTAACTTCTTTGCTTTTAATTCTTTCTTTACCTGTTTTAGCAGGAGGGATTACTATATTACTGTTAGAGCGTAATTTAAGGTCGGGGTATTTTGATGCTAGAGTGGGGGGTAACCCTGTTTTATTCCAGCATCTTTTT
195	355	BOLD;Cnidaria;81.55	0	0	1	0	0	0	0	0	0	0	0	2	0	0	0	4	0	0	0	0	0	0	0	0	0	0	0	0	0	0	0	0	TTTATCTTCAGCTATAACACACTCAGGAGCTTCTGTTGACTATGCTATTTTTAGTTTACATTTAGCAGGTATATCTTCAATTGGAGGTGCTATAAATTTTATAGTTACTATAATAAATATGCAGTGTTTAGGTATGACAAATTCTAAGTTACCTTTATTTTGCTGAGCTATTTTTATTACTGTAATTTTATTATTACTATCTTTACCTGTTTTGGCTGGAGCTATTACTATGTTATTGGTAGATAGAAATTTTAATGGTAGTTTTTTTGAAGTTGAAGGTGGAGGTGATCCGGTTTTGTATCAACATTTATTT
196	357	NCBI;cellular organisms;Eukaryota;Opisthokonta;Metazoa;Eumetazoa;Bilateria;Protostomia;Ecdysozoa;Panarthropoda;Arthropoda;Mandibulata;Pancrustacea;Crustacea;Multicrustacea;Hexanauplia;Copepoda;Neocopepoda;Gymnoplea;Calanoida;Paracalanidae;Paracalanus;	0	0	397	0	0	0	0	0	1	0	0	0	0	0	0	0	0	0	0	0	0	0	0	0	0	0	0	0	0	0	0	0	ATTATCTAGGAATATTGCCCATTCTGGAAGGTCAGTTGACTTCGCCATTTTTTCATTACATTTAGCAGGAGTAAGTTCAATTCTAGGTGCAGTAAATTTTATTAGGACTTTAGGAAATTTACGAGTATTCGGAATACTATTAGATCGAATACCTTTATTTGCATGAGCTGTTTTAATCACTGCTGTTTTATTACTATTGTCTTTACCTGTATTAGCAGGAGCCATTACTATACTATTAACTGACCGAAATTTAAATACTACATTTTACGATGTTGGTGGTGGTGGAGATCCAATCCTTTATCAACATTTATTT
197	359	NCBI;cellular organisms;Eukaryota;Opisthokonta;Metazoa;Eumetazoa;Bilateria;	0	9	3	12	0	0	0	0	0	0	0	0	6	0	0	9	18	0	4	0	0	186	0	0	0	0	0	0	0	0	0	0	ATTAAGTACGCTTGCATTCCATAGTGGAGGTGCAGTTGATCTTGCAATCTTCTCTCTGCACGTTTCTGGACTTTCAAGTATTCTTGGTGCGGTGAACTTCATTACAACCGTCCTAAATATGCGTGCACCAGGAATGCACTTCCATCGCCTTCCACTATTTGTTTGGGCGGTCTTCATTACTGCAATTCTTCTTCTTCTTGCGCTCCCAGTGCTTGCTGGAGGAATTACTATGCTTCTCACTGATCGTAACTTTAATACCTCATTCTTTGACCCAGCAGGTGGAGGTGATCCTATTCTCTTCCAGCACTTATTC
198	363	BOLD;Arthropoda;Copepoda;Calanoida;90.29	27	495	130	7	3	1	1	9	0	0	7	0	111	2	0	6	97	1	59	0	0	1467	58	5	0	0	3	0	19	0	0	5	TTTATCTTCAAAGACAGGTCAACCAGGCCCAGCAATGGATTTAGCAATCTTAAGTTTACACGTAGCTGGAGCTTCTTCTATTTTAGGAGCAATAAATTTCATTACTACTATTTTAAATATGAGAACACCAGGAATGACTTTGCATAAAATGCCATTATTCTCTTGGTCAATATTAGTGACAGCGTTTTTACTTTTATTATCTTTACCAGTTTTAGCAGGAGCAATCACAATGCTTCTAACTGATAGAAATTTTGGAACTGCTTTCTTTGAGGCTCAAACAGGAGGAGATCCAGTTCTATTCCAACATTTGTTT
199	367	NCBI;cellular organisms;Eukaryota;Sar;Stramenopiles;Ochrophyta;Bacillariophyta;	1	0	0	0	0	0	0	0	0	0	0	0	0	1	0	0	0	0	0	0	0	403	0	1	0	0	0	0	0	0	0	0	GCTATCAAGTGGTACTTCTCATTCAGGTGGAGCTGTAGATTTAGCAATTTTCAGTTTACACTTATCTGGTGCATCTTCTATTTTAGGTGCTATTAACTTTATTTGTACTATTTTTAATATGAGAGTTAAAAGTTTGGCTTTCCATAAACTACCTCTTTTTGTATGGGCAGTTTTAATAACAGCATTTTTATTATTGTTATCATTACCAGTTTTAGCTGGCGCTATTACAATGTTGTTAACTGATAGAAATTTCAATACGACCTTTTTTGATCCTGCTGGGGGAGGGGATCCGGTATTGTACCAACACTTATTT
200	368	NCBI;cellular organisms;Eukaryota;Viridiplantae;Chlorophyta;prasinophyte incertae sedis;Pycnococcaceae;	16	8	20	6	18	0	8	8	0	0	25	2	0	0	0	0	93	0	0	1	0	45	0	1	0	0	48	0	31	0	0	0	GCTTTCTAGTATTCTTGCTCATTCTGGGGGCGCGGTTGATCTTGCAATTTTTTCTCTTCACCTTTCTGGAATTTCGTCTATTCTAGGAGCTATTAATTTTATTACAACCGTTTTTAATATGCGCGCTCCTGGTATGGCTATATATCGTCTTCCGCTTTTTGTTTGGTCAATTCTCATTACGGCGTTTCTTCTTCTCCTTAGTCTGCCTGTTCTTGCGGGAGCTATTACTATGCTTCTCACTGACCGAAATTTCAATACAAGCTTTTTTGACCCTGCTGGTGGTGGAGACCCTATTCTGTATCAACACCTTTTT
201	370	NCBI;cellular organisms;Eukaryota;Haptista;Haptophyta;Prymnesiophyceae;Isochrysidales;Noelaerhabdaceae;	9	8	6	6	0	0	1	1	7	1	3	0	43	2	2	3	105	0	1	2	2	10	0	1	0	0	0	0	1	0	0	0	TCTAGCAGGGATTCAAGCTCATTCAGGAGGTTCTGTTGATTTAGCAATTTTCTCTCTTCATTTAGCCGGAGTTTCGTCGATTCTTGGTGCAATTAATTTTATTGTAACAATTATGAACATGCGAGCTCCAGGAATGACTGCTCACCGAACTCCTTTATTTGTATGAGCTGTATTTATTACAGCTTTCTTACTTTTATTGTCTTTACCAGTTCTAGCAGGAGCTATTACAATGCTTTTAACAGATCGTAACTTTAATACGTCATTCTTCGACCCTAATGGTGGAGGTGATCCAGTATTGTATCAACACTTGTTT
202	375	BOLD;Arthropoda;90.52	9	122	71	1	2	0	0	0	0	0	1	0	15	0	0	3	43	0	33	0	0	18	13	0	0	0	12	0	3	1	0	2	TTTGTCCTCTAAGACAGGTCAACCAGGACCAGCAATGGATTTAGCAATCTTAAGTTTACACGTAGCTGGAGCTTCTTCTATTTTAGGAGCAATAAATTTTATTACTACTATTTTAAATATGAGAACGCCAGGAATGACATTACATAAAATGCCGTTATTCTCTTGGTCAATATTGGTGACAGCGTTTTTACTTTTATTATCTTTACCAGTTTTGGCAGGAGCAATCACAATGCTTCTAACTGATAGAAATTTTGGAACTGCTTTCTTTGAAGCTCAAACAGGAGGGGATCCAGTTCTATTCCAACACTTGTTC
203	377	NCBI;cellular organisms;Eukaryota;Rhodophyta;Florideophyceae;Corallinophycidae;	8	49	22	0	0	13	0	0	0	0	0	0	3	0	0	2	13	0	2	0	0	93	54	4	0	0	10	0	34	0	1	7	ATTATCTTCTAAGGCTGGTCAGCCAGGTCCTGCAATGGATTTAGCAATATTAAGTTTACACTTAGCAGGAGCTTCTTCAATTTTAGGTGCAGTGAATTTTATCACCACAATTTTGAATATGAGAACACCTGGAATGACATTACATAAGATGCCTCTATTCGCTTGGTCAATTTTAGTAACTGCATTTTTATTATTATTATCTTTGCCAGTACTAGCTGGTGCAATAACGATGTTGTTAACAGATAGAAATTTTGGAACCGCTTTCTTTGAGGCTCAAACTGGAGGAGATCCCGTTTTATTCCAACATTTGTTT
204	378	NCBI;cellular organisms;Eukaryota;Viridiplantae;Chlorophyta;Chloropicophyceae;Chloropicales;Chloropicaceae;Chloropicon;Chloropicon primus;	21	0	43	60	14	0	3	55	17	2	62	0	0	0	2	2	91	1	24	0	5	7	101	29	0	2	39	0	0	0	0	0	TTTAAGTAGCGTTACAGCTCACTCGGGAGGTTCTGTAGACTTAGCTATCTTTAGTTTACACGTTTCAGGTGCTGCAAGTATCTTAGGTGCTATTAACTTTATCACCACAATCTTTAACATGCGCGCACCAGGAATGAATTTCCACCGTTTACCTTTATTCGTGTGGTCTGTTCTAATTACAGCTTTCCTACTTCTTCTTTCTCTTCCTGTTCTTGCAGGAGGGATTACAATGCTTCTAACAGACAGAAACTTTAACACAAGTTTCTTCGACCCGGCAGGTGGTGGTGACCCTGTTCTTTTCCAACACCTATTC
205	380	NCBI;cellular organisms;Eukaryota;Sar;Alveolata;Dinophyceae;Gymnodiniales;Kareniaceae;	6	288	0	0	0	0	0	0	0	0	0	0	0	0	0	0	20	0	0	0	0	12	0	0	0	0	0	0	0	0	0	0	ATTAAGTACTTCTTTTATGTCTTTATCACCTTCAAGTACATCTTTTATAATTTTTGGATTATTAATGTCAGGTATATCTTCATGTCTCACATCTCTTAACTTTTTTATTACTATTTTTAATCTGAGATCTTATTATTTGACATTAAAGACTATACCATTATTCTGTTGGGCTCTTTTGATAACAGGAGGAATGCTTTTATTAATCTTACCAATCTTATCAGGAGTTCTTTTAATGATTTTGGGTGATCTTCATTCTAATACACTTTTCTTTGATCCAATCTTTGGAGGAGATCCAATATTCTATCAACACTTATTT
206	381	BOLD;Porifera;78.46	10	19	18	0	0	0	0	0	0	0	0	0	0	0	0	4	29	0	9	0	0	0	13	0	2	0	0	0	0	0	0	2	TCTATCAAGCAATTTAGGTCATTCAGGACCTGCAGTTGACATGGCGATACTTAGTCTTCATCTAGCTGGAGCTTCATCTATATTAGGTGCAATTAATTTTATTACTACAATTTTTAATATGAGAACACCTGAAATGACACTACATAGAATGCCATTATTCGTTTGGTCTATTTTGGTTACTGTATTTCTTTTAGTTTTATCTCTTCCTGTTTTAGCAGGAGCCATTACAATGCTTCTTACTGATAGAAACTTTGGAACTGCTTTTTTTGCACCTGAAGGTGGAGGTGATCCGATTTTATTTCAACACTTGTTT
207	382	NCBI;cellular organisms;Eukaryota;Sar;Alveolata;Dinophyceae;Syndiniales;Syndiniaceae;Hematodinium;	0	0	0	23	0	7	24	0	0	0	0	0	0	1	0	0	36	0	129	8	1	134	7	2	0	0	0	0	188	0	0	0	ATTAAGTACATCATTAATGAGTCTATCACCTATTGGAATTGATATTATATTATGTGGATTATTATTGTCAGGTATATCATCATGTTTAACATCTATTAACTTCTTTGCTACAATTATAAATATGAGATGTTATAGTATGACATTATCTATTATGCCAGTATATACATGGTCTATATATATTACAGGATTTCTATTATTATTAACATTACCTATATTAACAGGAGCTCTTATAATATTATTAGCAGATCTTCATTATAATACAGTTTTCTTTGATCCAATATTTGGAGGTGATCCTGTACTTTATCAACATTTATTT
208	385	NCBI;cellular organisms;Eukaryota;Sar;Alveolata;Dinophyceae;	0	0	0	0	0	0	0	0	369	0	10	15	0	0	0	0	0	0	0	0	0	0	0	0	0	15	0	0	0	0	0	0	ATTATCCACTTCTTTTATGACTTTATCACCTTCAAGTACAGGAAATCTTATATTTGGATTATTAATTTCTGGTATATCTTCATGTCTTACATCTCTTAACTTTTGGATAACAATTCTAAATTTAAGATCTTATTATCTGACATTAAAGACTATTCCATTATTTCCTATATCTTTTTTGATTACAGCTTTTATGCTTCTATTAACATTACCAATATTATCTGGTACACTTCTTTTATTATTGGGTGATCTTCATTCTAATACACTTTTCTTTGATCCAATATTTGGAGGAGATCCTATATTCTATCAACATTTATTT
209	386	BOLD;Arthropoda;Copepoda;Calanoida;90.29	4	14	52	7	11	0	0	19	0	0	18	0	6	0	0	6	14	0	12	0	0	75	12	1	0	0	0	0	10	0	0	0	TCTATCTTCTAAAACAGGTCAACCAGGTCCAGCAATGGATTTAGCAATCTTAAGTTTACACGTAGCAGGGGCTTCTTCTATTTTAGGAGCAATAAATTTCATCACTACTATTTTAAATATGAGAACACCGGGAATGACATTACATAAAATGCCATTATTCTCATGGTCAATTTTAGTAACAGCGTTTTTACTTTTATTATCTTTACCAGTTTTAGCTGGCGCAATCACAATGCTTCTAACTGATAGAAACTTTGGAACTGCTTTCTTTGAAGCTCAAACAGGGGGAGATCCAGTTCTTTTCCAACACCTGTTT
210	387	NCBI;cellular organisms;Eukaryota;Sar;Stramenopiles;Ochrophyta;Bacillariophyta;Mediophyceae;Cymatosirophycidae;Cymatosirales;Cymatosiraceae;Minutocellus;Minutocellus polymorphus;	2	0	101	52	0	0	0	0	0	0	0	0	0	0	4	14	10	0	112	7	0	0	0	0	0	0	10	1	1	0	0	3	GCTTTCAAGTGGAACGTCTCACTCAGGTGGAGCCGTTGATTTAGCGATCTTTAGTTTACACCTTTCAGGAGCTTCATCAATTTTAGGAGCAATTAATTTTATATGTACCATTTTTAATATGCGAGTAAAAAGTCTGTCATTTCACAACTTACCCCTTTTTGTTTGGGCGGTCTTAATTACCGCTTTCTTATTATTGCTGTCTTTACCTGTATTAGCAGGAGCAATAACAATGTTATTGACTGATAGAAACTTTAATACTACTTTCTTTGATCCAGCTGGAGGAGGAGATCCTGTACTGTATCAACACTTGTTT
211	392	NCBI;cellular organisms;Eukaryota;Opisthokonta;Metazoa;Eumetazoa;	22	145	45	3	0	0	0	5	0	0	9	0	37	0	0	29	19	0	22	0	0	35	29	2	0	0	0	0	3	0	0	11	TTTGAGCTCCATTACCGGACATAGTTCTCCTGCTGTTGATATGGCTATTTTTTCTCTTCACTTAGCTGGAGCTTCATCAATATTGGGTGCAGTAAACTTTATTACTACAATTCTTAATATGAGGGCGCCTGGTATGACTCTTCATAAAATGCCTTTATTCGCTTGGTCTATGTTAGTAACAGCTTTTCTTCTTCTTTTAGCCGTTCCTGTACTAGGTGGAGCTATTACTATGCTCTTAACTGACCGTAACTTTGGAACTACATTTTTCGATCCAGCCGGTGGTGGAGACCCTGTTCTTTTCCAACACCTTTTC
212	394	NCBI;cellular organisms;Eukaryota;Opisthokonta;Metazoa;Eumetazoa;Bilateria;Protostomia;	0	0	0	0	0	0	0	0	0	0	0	0	0	0	0	0	0	0	0	0	0	0	0	1	0	0	0	0	0	0	0	0	TTTATCCGGAAATTTAGCACACGCAGGACCCTCTGTTGACCTGGCTATTTTCTCGCTTCACTTAGCAGGAATCTCATCAATTCTAGGAGCCTTAAATTTTATTACTACAGTAATTAACATACGATGAAAAGGGCTACGCCTTGAGCGAATCCCATTATTTGTTTGAGCGGTTGTTATTACAGCTGTTCTGCTTCTTCTCTCACTTCCAGTTTTAGCAGGAGCTATTACCATACTTCTAACAGACCGAAATTTAAACACCAGGTTTTTTGACCCAGCTGGTGGGGGTGACCCCATCCTCTATCAACACTTATTC
213	395	NCBI;cellular organisms;Eukaryota;Opisthokonta;Metazoa;Eumetazoa;Bilateria;Protostomia;Spiralia;Gnathifera <animals>;Rotifera;Eurotatoria;Monogononta;Pseudotrocha;Ploima;Trichocercidae;Trichocerca;unclassified Trichocerca;Trichocerca sp. WM-2017h;	0	2	346	0	0	0	0	0	2	0	0	0	0	0	0	1	0	0	0	0	0	0	0	0	0	0	0	0	0	0	0	0	TTTATCAGATTCTAAATACCATAGAGGAATTTCGGTAGATTTAGCTATCTTTAGATTGCATATTGCTGGTATTTCATCAATTTTAGGAAGAATTAATTTTCTTACTACAATTATTTGTTCACGTACTACTAAGATAGTTTCTTTAGATCGTATACCTTTAATAATTTGAGCGTTAGCAGTTACTGCAGTGCTTTTAATTACTAGATTACCTGTATTGGCAGGCGCTATTACTATGCTATTAACAGATCGTAATTTTAATACTTCATTTTTCGATCCTGCTGGTGGTGGAAATCCTGTTTTATACCAACATTTATTC
214	396	NCBI;cellular organisms;Eukaryota;Viridiplantae;Chlorophyta;Mamiellophyceae;Mamiellales;Mamiellaceae;Micromonas;Micromonas pusilla;	0	36	0	1	0	0	0	0	0	0	0	0	0	0	0	0	6	0	0	0	0	0	0	0	0	0	0	0	0	0	0	0	ATTAAGTCATATTACAAGTCACTCGGGAGGTGCTGTAGATTTAGCTATCTTTAGTTTACACGTATCAGGAGCAAGTAGTATTTTAGGTGCAATTAATTTTATTACAACTATTTTTAATATGCGAGGGCCTGGGTTACTTCTTCATCGTCTGCCATTATTTGTGTGGAGTGTATTAATTACAGCTTTTTTACTTTTATTATCTCTTCCAGTTTTAGCAGGAGCTATTACAATGCTTTTGACTGATCGTAACTTTTCAACTAGTTTTTTTGATCCAAGTGGTGGTGGTGACCCAATTTTATATCAGCATTTATTC
215	398	NCBI;cellular organisms;Eukaryota;Haptista;Haptophyta;Prymnesiophyceae;Phaeocystales;Phaeocystaceae;Phaeocystis;Phaeocystis globosa;	5	30	2	16	16	0	0	4	0	0	7	0	15	0	0	1	13	0	0	1	0	94	0	1	0	0	0	0	0	0	0	0	TTTGGCTGGTATACAGGCACATTCGGGTGGTTCTGTAGATTTAGCTATTTTTAGTTTACACGTAGCAGGAGTATCTTCAATTCTTGGTGCTGTTAATTTTATTGTAACAATTATGAATATGAGAGCACCTGGTATGACTGCTCATAGAACACCATTATTTGTTTGAGCCGTTTTCATAACTGCTTTTTTACTTTTATTATCTTTACCGGTTTTAGCAGGTGCAATAACTATGCTACTAACTGATAGAAACTTTAATACTGCTTTTTTTGATCCTAGTGGTGGAGGTGACCCTGTGTTATATCAACATTTATTT
216	399	NCBI;cellular organisms;Eukaryota;Sar;Stramenopiles;Ochrophyta;Bacillariophyta;Bacillariophyceae;Bacillariophycidae;Bacillariales;Bacillariaceae;Pseudo-nitzschia;	7	3	0	0	0	0	0	1	28	0	0	1	0	0	0	1	29	0	0	0	0	0	0	0	0	0	0	0	0	0	0	1	TCTTTCGAGTGTTTTATCTCACTCAGGAGGTTCAGTTGATTTAGCAATTTTTAGTCTTCACTTATCAGGAGCAGCTTCGATCTTAGGTGCAATTAATTTTATTTGTACTATTGTAAACATGAGAACTGAAAGTTTACCATTTCACAAGCTTCCTCTGTTTGTTTGGTCTGTTTTTATTACTGCAATTTTATTACTATTGTCATTACCTGTTTTAGCAGGAGCAATTACAATGTTATTAACTGATAGAAATTTCAACACTACTTTCTTTGATCCTGCAGGTGGAGGAGATCCTGTACTTTTCCAACACTTATTT
217	400	NCBI;cellular organisms;Eukaryota;Sar;Alveolata;Dinophyceae;	0	0	0	4	2	0	25	28	158	0	84	29	0	0	0	0	0	0	0	0	0	0	0	0	0	38	0	0	0	0	0	0	ATTATCTACTTCTTTTATGACTTTATCACCTTCAAGTATAGGAAATCTTATATTTGGATTATTAATTTCTGGTATATCTTCATATCTTACATCTCTTAACTTTTTTAATACAATTTTAAATTTGAGATCATATTATCTGACATTAAAATCAATCCCATTATTTATTTGGTCTTTTCTTATAACTGCTTTCTTATTATTATTAACATTACCAATATTATCTGGTACACTTTTATTATTAGTGGGTGATTTACATTTTAATACTCTTTTCTTTGATCCAATATTTGGAGGAGATCCTATATTTTATCAACATTTATTT
218	403	NCBI;cellular organisms;Eukaryota;Opisthokonta;Metazoa;Eumetazoa;Bilateria;Protostomia;Spiralia;Lophotrochozoa;Annelida;Polychaeta;Sedentaria;Canalipalpata;Spionida;Spionidae;	0	0	371	0	0	0	0	0	0	0	0	0	0	0	0	0	0	0	0	0	0	0	0	0	0	0	0	0	0	0	0	0	TCTTTCTGGTAATGTAGCACACGCAGGCCCAGCGGTAGATTTAACTATTCTATCTCTTCACTTAGCTGGTGTTTCATCTCTTATAGGGGCTATTAACTTTACTACAACCATCCTCAACAGTCGAATAGAAGGAATGCCTACAGAAAAAATACCCTTGTTTATTTGATCTGTTCTTATTACCGTAGGCCTTCTAATTCTAGCCCTCCCCGTTCTGGCAGGCGCTCTTACAATACTAATTCTCGATCGAAACTGTAACACATCCTTCTTCGAACCAACAGGAGGGGGTGACCCTATTCTATTTCAACATCTATTC
219	404	NCBI;cellular organisms;Eukaryota;Sar;Alveolata;Apicomplexa;Aconoidasida;Haemosporida;Plasmodiidae;	7	75	1	13	0	0	0	0	0	0	0	0	0	0	0	1	10	0	10	0	0	54	0	4	0	0	0	0	8	0	0	0	TTTAAGTACTAGTTTAATGAATTTATCTCCTGTAGATATTGACTTACTTATTATAGGATTATTATTATCAGGTATTTCTTCTTTTATGACTTCTTTAAACTTTTTTACTACTATTATAAATATGAAAGATTATGGATTAACTGTTTCTTTATTATCACTTTATACTTTTACTATATTAATAACTACATTATTACTCCTTTTATCATTACCTATATTAACAGCCACTTTTTTTAAGATATTTTCAGATTTACATTTTAATACTATATTCTTTGATACTAATTTTTATGGAGATCCTATTTTATATCAACATTTATTT
220	406	NCBI;cellular organisms;Eukaryota;Opisthokonta;Metazoa;Eumetazoa;Bilateria;Protostomia;Ecdysozoa;Panarthropoda;Arthropoda;	1	16	31	6	0	0	8	0	0	0	0	3	0	0	1	0	0	0	0	0	0	64	0	0	0	239	0	0	0	0	0	0	ACTTAGAAGAAATATTGCACACGCAGGCCCCTCTGTAGATTGTGCGATCTTTTCACTTCATTTAGCGGGGATTTCATCAATTTTAGGGGCAATAAACTTTATCACTACAATTTTAAACATGCGGGTGCTAGGGATAATACTAGATCAAATACCTTTATTTGTTTGGTCAGTTCTTATTACCACAGTTCTTTTGCTGCTGGCCTTACCTGTTTTAGCGGGGGCTATTACGATGCTTTTAACAGATCGTAATCTAAATACTTCTTTTTACGACCCATCAGGAGGGGGGGATCCTATTTTATATCAGCACCTGTTT
221	407	NCBI;cellular organisms;Eukaryota;Sar;Stramenopiles;Ochrophyta;Bacillariophyta;Coscinodiscophyceae;Thalassiosirophycidae;Thalassiosirales;Skeletonemataceae;Skeletonema;Skeletonema potamos;	9	0	178	1	0	0	0	0	1	0	0	0	0	0	0	0	163	0	5	0	0	0	0	0	0	0	0	0	0	0	0	0	ATTATCAAGCGCAACAGCTCATTCAGGAGGTTCTGTAGATTTAGCAATATTTAGTTTGCATTTATCTGGCGCATCTTCTATTTTAGGTGCAATCAACTTTATTTGTACAATTTTTAACATGCGAGTAAAAAGTTTATCTTTCCATAACTTACCTTTATTTGTGTGGTCTGTTTTAATTACAGCTTTTTTATTATTGTTGTCTCTGCCAGTATTAGCTGGAGCAATTACAATGCTGTTAACAGATAGAAATTTTAATACAACTTTCTTTGATCCTGCAGGTGGTGGTGATCCTGTATTATTTCAGCATCTTTTC
222	410	BOLD;Haptophyta;83.33	0	0	0	1	24	0	22	4	14	1	0	1	0	1	259	0	0	0	0	0	7	0	0	3	0	4	0	0	0	0	0	0	TTTAAGTAGTGTTCAAGCACATTCGGGTCCGTCGGTAGATTTAGCTATCTTTAGTTTACATTTATCAGGGGCTTCATCAATTCTTGGAGCAATAAACTTCATTACAACAATTTTTAATATGAGAGCTCCGGGAATGTCAATGCATCGACTTCCTTTATTTGTATGGGCTGTTTTAATTACAGCTTTTTTATTACTTCTATCGTTACCAGTATTAGCCGGGGCAATTACAATGCTCCTAACAGATAGGAATTTTAATACAACATTTTTTGATCCAGCAGGTGGTGGTGATCCGGTATTATACCAACATCTTTTT
223	411	NCBI;cellular organisms;Eukaryota;Opisthokonta;Metazoa;Eumetazoa;Bilateria;Protostomia;Spiralia;Lophotrochozoa;Mollusca;	0	0	1	0	0	0	2	0	933	2	0	2	0	0	0	0	0	0	0	0	0	0	0	0	0	0	0	0	0	0	0	0	CTTTCCTCTGTGGAACATCATGGGAGGATGAGTGTTGATTTGACAGCTTTATCTCTTCATTTAGCTGGTGTGTCTTCGATTGGTGCGTCCATTAATTTCATAACCAGGTGTAAAAACATACCTGTTTGGGGTATGCGTGGGGAGCGAATAGTCCTTTTTCCGTGATCTATTGTAGTAGCTTCTACTTTGTTGCTACTATCATTACCCGTCTTAGCTGGGGGTATTACAATGCTTTTATTTGATCGGCACTTTAATACTACCTTTTATGACCCTAGGGGCGGGGGTGATCCCGTGTTATACCAGCATTTATTC
224	413	NCBI;cellular organisms;Eukaryota;Haptista;Haptophyta;Prymnesiophyceae;Phaeocystales;Phaeocystaceae;Phaeocystis;	8	46	2	1	2	1	0	0	0	0	6	0	0	0	0	3	52	0	0	0	0	3	11	2	1	0	0	0	0	0	0	0	TTTATCTGGAATTTTAGCTCATTCTGGGGGTGCGGTAGATTTAGCTATTTTTAGCTTACATTTAGCCGGTATTTCTTCAATTTTAGGCGCTATCAATTTTATTGTAACGATATTAAATATGCGTTGTCCTGGAATGACTGCTCACAGAACGCCTTTATTTGTTTGAGCTGTTTTTATCACCGCTTTTTTGCTTTTACTTTCTCTTCCTGTTTTAGCTGGTGCTATCACTATGTTACTAACAGATAGGAATTTTAATACTTCCTTTTTTGATCCCAGCGGTGGCGGTGACCCAGTTTTGTACCAACACTTATTT
225	416	NCBI;cellular organisms;Eukaryota;Sar;Stramenopiles;Ochrophyta;Bacillariophyta;Coscinodiscophyceae;Coscinodiscophycidae;Paraliales;Paraliaceae;Paralia;Paralia sulcata;	0	0	0	0	0	0	21	3	0	0	287	0	0	0	0	2	0	0	0	0	0	0	0	0	0	0	0	0	0	0	0	0	ATTATCAAGTGGTAATTCACATTCTGGACCGGCTGTAGATTTAGCAATTTTTAGTCTGCATTTATCGGGTGCTTCTTCTATTTTAGGAGCAATAAATTTTATTACAACTATATTAAATATGAGAACTAAAGGAATGTTCATGCATAAACTTCCGTTATTTGCATGGTCGATCTTAATTACTGCTGTTTTATTGCTTTTATCTTTACCTGTGCTTGCTGGGGCTATTACAATGTTATTAACTGATAGAAATTTTAATACTACATTTTTTGATCCTGCAGGTGGAGGTGATCCAGTATTGTATCAGCATTTATTT
226	417	NCBI;cellular organisms;Eukaryota;Opisthokonta;Metazoa;Eumetazoa;Bilateria;Protostomia;Spiralia;Lophotrochozoa;Mollusca;	0	0	0	0	0	0	0	329	0	0	0	0	0	0	0	1	1	0	0	0	0	0	1	0	0	0	0	0	0	0	0	0	GTTGTCTAGAAACGTTACTCACAGGGGGGGTTCAGTTGATTATGGGATTTTTTCTCTTCATTTGGCGGGGGTATCTTCTATTTTGGGGGCTATTAATTTCTTAGCTACGACGGTTAATATGCGGCCCGAAATCATGGAGCTAAAGCGGGTAACTTTGTTTGTTTGGTCAATTGCTATTACAGCATTTTTGCTAGTTGTGGCTATGCCTGTCTTAGCGGGGGCTATTACTATATTACTAACGGATCGGAATTTTAATACGTCTTTCTTTGATCCCTCAGGGGGAGGAGACCCTATTTTGTTTGTTCACCTATTT
227	418	NCBI;cellular organisms;Eukaryota;Opisthokonta;Metazoa;Eumetazoa;Bilateria;Protostomia;Ecdysozoa;Panarthropoda;Arthropoda;Mandibulata;Pancrustacea;	0	0	32	0	0	0	0	1	0	0	0	0	0	0	0	0	109	0	117	0	0	0	0	0	0	0	0	0	0	0	0	0	TTTAAGTTCCTATATGTACCATGGAGGGGCTTCAGTAGATTATGCTATTTTTAGACTTCACTTAGCAGGGATTTCTTCTTTACTTGGAGCAGTTAATTTCATTAGTACTATTATTAACCTTCGAGTGTTAGGAATAAATTTAGGTTTAATACCTCTATTCCCTTGAGCTGTTCTAATTACAGCCATTCTTCTTCTTCTTTCTCTTCCTGTACTGGCAGGAGCTATTACAATACTTTTAACAGATCGTAATCTAAGTACTTCTTTTTATGATTCTTTAGGGGGCGGGGACCCTGTACTCTACCAACACCTATTT
228	420	NCBI;cellular organisms;Eukaryota;Opisthokonta;Metazoa;Eumetazoa;Bilateria;Protostomia;Ecdysozoa;Panarthropoda;Arthropoda;Mandibulata;Pancrustacea;Crustacea;Multicrustacea;Malacostraca;Eumalacostraca;Peracarida;Mysidacea;Mysida;Mysidae;Mysinae;Calyptommini;Michthyops;Michthyops parvus;	14	9	67	5	37	0	25	13	3	0	116	4	7	0	0	11	54	0	69	0	6	41	1	6	0	3	24	0	0	0	0	13	TTTAAGTAATTTATCAGGACATCCTGGCGCTGCTGTGGACATGGCAATTTTTAGTCTGCACCTAGCCGGTATGTCATCTATTCTTGGATCAATCAATATGATTGTTACTATTTTCAATATGCGTGCTCCTGGAATGAGTTTGTTTAAAATGCCGTTATTTGTGTGGTCAATTTTACTGACAGCTTTTCTTTTGGTCTTGGCACTTCCGGTTTTAGCTGGCGCTATTACTATGCTTCTGACGGACCGTAATTTTGGAACGCATTTCTTCTCACCTGAGGGTGGAGGAGATCCTATTTTATTCCAGCACTTATTC
229	422	NCBI;cellular organisms;Eukaryota;Opisthokonta;Metazoa;	3	64	33	1	0	0	0	0	0	0	0	0	7	0	0	0	22	0	38	0	0	35	43	0	0	0	0	0	5	0	0	2	ATTATCATCTAAAGCTGGTCAACCAGGTCCAGCAATGGACTTGGCAATTTTAAGTTTACACTTAGCAGGAGCTTCTTCAATTTTAGGTGCAGTAAATTTTATTACCACAATCTTAAATATGAGAACACCAGGAATGACATTACATAAAATGCCTTTATTCGCTTGGTCAATTCTAGTTACTGCATTCTTATTGTTGTTATCTTTACCAGTACTTGCTGGTGCGATAACTATGTTGTTAACAGATAGAAATTTTGGAACCGCCTTTTTTGAGGCTCAGACAGGAGGTGATCCAGTTTTATTTCAACATTTGTTT
230	428	NCBI;cellular organisms;Eukaryota;Opisthokonta;Metazoa;Eumetazoa;Bilateria;Protostomia;Ecdysozoa;Panarthropoda;Arthropoda;Mandibulata;Pancrustacea;Crustacea;Multicrustacea;Hexanauplia;Copepoda;Neocopepoda;Podoplea;Cyclopoida;Oithonidae;Oithona;Oithona attenuata;	0	0	0	0	0	0	0	0	2	0	0	235	0	0	0	0	0	0	0	0	0	0	0	0	0	0	0	0	0	0	0	0	ACTAAGGGGAAATGTGTCCCACAGAGGAGCTGCAGTGGATTTTGCTATTTTTTCTTTACACTTGGCAGGGGTTTCTTCTTTATTAGGGGCAATCAATTTTATTACAACTATCGTCAACCTCCGAGCACTTGGGATTTTTTTAGATCGGATACCCATATTTCCATGAGCTGTTTTAATTACCGCAATTTTACTACTTTTATCTTTACCTGTTCTTGCTGGGGCTATTACAATGCTACTTACTGACCGAAACTTTAACTCTTCTTTTTATGACCCTAGTGGCGGAGGAGACCCTGTTCTTTACCAGCACTTATTC
231	430	NCBI;cellular organisms;Eukaryota;Sar;Stramenopiles;Ochrophyta;Raphidophyceae;Chattonellales;Chattonellaceae;Fibrocapsa;Fibrocapsa japonica;	4	0	2	0	0	0	0	2	0	0	44	3	0	0	0	0	10	0	0	0	0	0	0	0	0	0	0	0	0	0	0	0	ACTAAGTAGTATTCAAGCGCATTCAGGACCTGCTGTTGATTTAGCAATTTTTAGCCTACACGTTTCAGGAGCTGCTTCTATATTAGGTGCGATTAATTTTATCACCACAATTATGAATATGCGAGCTATCGGAATGGCTTACCACCGACTACCGTTATTCGTATGGGCAGTCTTTATTACTGCTGTTTTACTATTACTATCTTTACCAGTATTAGCAGGAGCGATTACCATGTTATTAACGGATCGAAATTTTAATACATCATTTTATGATCCAGCTGGAGGAGGTGATCCAGTACTTTATCAACATTTATTC
232	432	NCBI;cellular organisms;Eukaryota;Opisthokonta;Metazoa;Eumetazoa;Bilateria;Protostomia;Ecdysozoa;Panarthropoda;Arthropoda;Mandibulata;Pancrustacea;Crustacea;Multicrustacea;Hexanauplia;Copepoda;Neocopepoda;Podoplea;Cyclopoida;Cyclopidae;Thermocyclops;Thermocyclops taihokuensis;	0	0	0	44	0	0	0	0	0	0	270	0	0	0	16	0	0	0	0	0	0	0	0	0	0	0	0	0	0	0	0	0	TTTAAGAAGAAATATCGCTCATAGGGGTGCATCAGTTGACCTAGCAATCTTTTCCCTTCACCTGGCAGGGGTGTCTTCCCTTTTAGGCGCAGTAAATTTTATCAGTACTTTAAGTAACTTACGAGCCATGGGCATGTTAGCGGACCGAATGCCATTATTTCCTTGAGCTGTGCTAGTGACAGCTATCCTGCTCTTACTTTCTCTGCCGGTGCTGGCAGGGGCAATTACCATACTTTTGACCGATCGAAACTTTAACTCCTCATTTTATGACCCTAGAGGTGGAGGGGACCCTCTGTTATACCAACACTTGTTC
233	434	NCBI;cellular organisms;Eukaryota;Sar;Stramenopiles;Ochrophyta;	43	3	16	44	10	0	0	2	24	0	18	1	8	6	18	16	120	0	2	4	0	10	0	0	0	4	0	0	0	0	0	0	TCTAAGTAGTGTACAAGCACACTCAGGGCCGTCTGTAGATTTAGCTATTTTTAGTCTACATCTTTCGGGGGCTTCATCAATTTTGGGGGCAATTAATTTCATCACCACTATTTTTAACATGCGGGCACCTGGTATGACTATGCACCGTCTACCATTGTTTGTTTGGGCTATCTTGATTACAGCGTTCTTGTTGCTTCTTTCTTTACCCGTTTTAGCAGGTGCAATTACTATGCTGTTGACTGACCGTAATTTCAACACAACCTTTTTTGACCCTGCGGGTGGTGGTGATCCTGTTCTTTACCAACATTTGTTT
234	436	NCBI;cellular organisms;Eukaryota;Viridiplantae;Chlorophyta;Chloropicophyceae;Chloropicales;Chloropicaceae;Chloropicon;Chloropicon mariensis;	5	0	7	13	8	0	6	7	15	0	72	0	2	0	1	0	49	0	10	0	20	1	81	50	0	0	44	0	0	0	0	0	ACTAAGTAGTATTACAGCTCACTCTGGTGGTTCTGTGGACCTTGCTATCTTTAGTTTACACGTTTCGGGTGCAGCAAGTATCTTAGGAGCTATCAACTTTATTACAACAGTCTTTAACATGCGTGCTCCGGGGATGACTTTTCACCGACTACCGTTATTTGTTTGGTCTGTTCTTATTACAGCATTCTTGCTTCTTCTTGCTCTTCCTGTTTTAGCTGGTGGTATCACTATGCTTTTAACAGACAGAAACTTTAATACAAGTTTCTTTGATCCTGCAGGAGGAGGTGACCCGGTATTATTCCAACACCTATTT
235	437	BOLD;Ochrophyta;82.91	0	0	5	9	0	0	0	0	0	0	0	0	0	0	0	0	14	0	36	0	0	0	0	0	0	0	0	0	0	0	0	0	ACTATCAGGAGCTCAAGCCCATTCAGGTCCTTCTGTAGACTTAGCAATATTTAGTTTACATCTATCAGGAGCATCTTCTATATTAGGAGCTATTAATTTTATCACTACAATTTTTAATATGAGAAGTCCTGGGTTAGGAATGCATAGACTTCCTTTATTTGTTTGGTCAGTGTTAATTACTGCGTTTTTATTACTATTATCGTTACCTGTTCTAGCAGGAGCGATAACTATGTTATTAACCGATAGAAATTTTAACACTACCTTTTTTGATCCAGCTGGTGGAGGTGATCCAGTTTTATATCAGCATTTATTC
236	439	NCBI;cellular organisms;Eukaryota;Sar;Stramenopiles;Bigyra;Labyrinthulomycetes;Thraustochytrida;Thraustochytriaceae;Botryochytrium;Botryochytrium radiatum;	23	12	0	0	0	0	0	0	0	0	0	0	20	0	0	1	186	0	9	0	0	18	0	0	0	0	0	0	0	0	0	0	GCTTTCAAGTGTTCAGGCTCATTCAGGTCCTTCTGTAGATCTTGCTATTTTTAGTTTGCATGTTTCAGGGGCATCCTCTATCTTGGGTGCTATCAACTTTATTACAACTATTTTTAATATGAGAGCTCCCGGTATAACAATACATAGGCTTCCTTTGTTTTGTTGGGCTGTTTTGATTACAGCATTCTTGTTGCTGTTGTCTTTGCCAGTACTTGCTGGTGCGATTACTATGTTGCTATGTGATAGAAATTTTAATACCACTTTTTTTGACCCAGCTGGAGGAGGAGATCCTGTGCTGTTTCAACATTTGTTT
237	441	NCBI;cellular organisms;Eukaryota;Rhodophyta;Florideophyceae;	0	0	15	0	0	0	0	0	0	0	0	0	0	0	0	235	20	1	8	0	0	1	262	37	2	0	10	0	5	0	0	362	ATTATCTAACAAACTTGGTCATGCAGGACCATCGGTCGACATGGCAATTTTTGCACTCCATTTAGCAGGAGCCTCTTCAATATTAGGAGCGGTGAATTTCATTACAACTATTTTAAATATGAGAACGCCAGGAATGACTATTCATAAAATGCCTCTTTTTGTATGGGCTATGCTCATTACAGCTTTCTTATTATTACTAGCTGTTCCTGTTCTTGCAGGGGCTATAACTATGCTTTTGACTGACAGAAATTTTGGAACTACATTTTTTAATCCTGCAGGTGGAGGAGATCCAGTTTTATTTCAACACTTATTT
238	443	NCBI;cellular organisms;Eukaryota;Opisthokonta;Metazoa;Eumetazoa;	0	18	26	0	0	0	2	188	0	0	151	0	2	0	0	7	11	0	18	0	0	14	0	6	2	0	0	0	0	0	0	5	TTTGAGTTCCATTACTGGACATAGTTCTCCTGCTGTTGATATGGCTATTTTTTCACTTCACTTAGCTGGCGCTTCTTCAATATTGGGCGCAGTAAACTTTATTACCACAATTCTCAATATGAGAGCACCTGGTATGACTCTTCATAAAATGCCTTTATTTGCGTGGTCTATGTTAGTAACTGCTTTTCTTCTTCTGTTAGCTGTTCCTGTTTTAGGTGGAGCTATCACTATGCTTCTTACTGATCGTAACTTCGGAACTACATTTTTTGATCCAGCCGGTGGAGGAGATCCTGTTCTTTTTCAACACCTTTTC
239	446	NCBI;cellular organisms;Eukaryota;Sar;Stramenopiles;Ochrophyta;Chrysophyceae;Chromulinales;Chromulinaceae;Pedospumella;Pedospumella sinomuralis;	0	0	0	2	35	0	18	11	103	5	4	2	0	0	119	0	0	0	0	0	121	2	8	5	0	18	0	0	1	0	2	0	TTTAAGTAGTGTTCAAGCGCATTCGGGTCCATCGGTAGATTTAGCTATTTTTAGTTTACATTTATCGGGAGCATCATCAATTCTTGGGGCAATAAACTTTATTACAACAATTTTTAATATGAGAGCTCCAGGAATGACAATGCACAGACTTCCATTGTTCGTATGGGCTGTTTTAATTACAGCTTTCTTATTACTTCTATCATTACCTGTATTAGCAGGGGCAATTACCATGTTATTAACTGATAGGAATTTTAATACAACATTTTTTGATCCAGCAGGTGGAGGAGATCCTGTATTGTATCAGCACCTTTTT
240	447	BOLD;Cnidaria;83.5	0	0	0	0	0	0	0	0	0	1	0	0	0	0	0	0	0	0	0	0	0	0	0	0	0	0	0	0	0	0	0	0	ATTATCATCATCTTTAGCTCATGCTGGAGCTTCCGTTGATTACGCTATTTTTAGTTTACATGTAGCAGGTATTTCTTCAATAGCTGGTGCTGTAAATTTTATAGTAACAATAATAAATATGCAATGTTTAGGTATGACAATGTCAAGATTACCTTTATTTGTTTGAGCTATATTTATAACTGTAATCTTATTACTTTTATCTTTACCTGTATTAGCAGGAGCTATAACAATGTTATTAGTTGATAGAAATTTTAATGGTAGTTTTTTTGAAGTTGAAGGAGGGGGTGATCCTGTATTATACCAACATTTATTT
241	448	NCBI;cellular organisms;Eukaryota;Sar;Stramenopiles;Ochrophyta;Bacillariophyta;	0	272	0	0	0	0	0	0	0	0	0	0	0	0	0	0	0	0	0	0	0	0	0	0	0	0	0	0	0	0	0	0	TTTGTCTAGTGGTACAGGTCACTCAGGAGCAGCCGTAGATTTAGCCATTTTTAGTCTACATGTTTCAGGAATATCTTCTATTTTAGGAGCTATAAATTTTATTTGTACTATTTTTAATATGAGAATTAAAAGCTTAGCTTTTCATAAACTTCCTTTATTTGTATGGGCTATTTTAATCACAGCATTTTTACTTCTACTATCACTTCCTGTTTTAGCTGGAGCAATAACAATGTTGTTGACTGACAGAAACTTTAATACAACTTTTTTTGATCCTGCTGGAGGAGGGGATCCTGTATTATACCAACATTTGTTT
242	449	NCBI;cellular organisms;Eukaryota;Opisthokonta;Metazoa;Eumetazoa;	0	1	0	6	0	0	0	0	0	0	0	0	0	0	0	0	5	0	0	0	0	0	0	0	0	0	0	0	0	0	0	0	ACTATCATCAGTTATAGCCCATTCTGGAGTATCTGTAGACTTTGCTATATTTAGCTTACATATAGCGGGAGTTAGTTCAATAGCAGGAGCTATTAACTTTATTAGCACACTTCTAAATATGAAATTATATAATATGACCTGGAATAGATTAACACTTTATCTATGATCAGTATTCATTACAGTAATATTACTATTACTATCCTTACCAGTATTAGCTGGAGCTATTACTATGCTATTGACTGACAGAAATTTTAATACAACATTTTTTGATCCATCTGGTGGGGGAGACCCTATACTATTTCAACATCTCTTT
243	450	NCBI;cellular organisms;Eukaryota;Sar;Alveolata;Dinophyceae;	0	4	452	0	0	0	1	0	0	0	0	0	0	0	0	0	0	0	0	0	0	0	0	0	0	0	0	0	0	0	0	0	ATTAAGCACTTCTTTCATGAGTTTATCACCTTCAAGTACAGGAAATCTCTTGTTTGGATTATTAATCTCAGGTATATCCTCATGTCTCACATCTCTTAATTTTTGAACAACAATTCTAAATCTGAGATCTTATTATCTGATCTTAAAGACAATGCCACTATTCCTTTGGGCTCTCTTGATTACAGGAGGAATGCTTTTATTAACATTACCAATCTTATCTGGAGCTCTTTTAATGGTCTTGGCTGATCTTCATTCTAATACACTTTTCTTTGATCCAATCTTTGGAGGAGATCCTATATTCTATCAACACTTATTT
244	452	NCBI;cellular organisms;Eukaryota;Opisthokonta;Metazoa;	0	2	0	1	0	0	0	0	0	0	0	0	0	0	0	1	0	0	0	0	0	0	0	0	0	0	0	0	44	0	0	0	TCTTAGTAGCTTACAGGGACATCCCGGCGCAGCTGTAGATTTAGCGATCTTTACAATACACTTAGCTGGGGTTTCTTCGCTATTAGGTGCTATAAATTTTATTACTACAATAATAAATATGAGAGCTCCCCATATCGGATGGCATAGATTGCCTTTATTTGTTTGGGCAGTGTTTGTAACTGCTTGGATGCTTCTTTTGTCTTTACCTGTTTTAGCTGCAGCTGTTACTATGGTGCTGACGGATCGTAACTTTAACACTACATTTTTTGATCCTTCTGGGGGTGGTGACCCTATTTTGTATCAACATTTGTTT
245	453	BOLD;Mollusca;80.52	0	31	1	8	30	0	0	2	0	0	42	0	21	1	0	1	123	0	28	2	0	79	107	17	0	0	55	0	0	0	0	0	ATTAAGTAGTGTTCAAGCACACTCTGGTCCTTCTATCGATTTAGCAATTTTCAGTCTTCACTTAGCTGGTGCTTCGTCTATTTTAGGTGCAGCAAACTTCATTACAACTATTATTAACATGCGTGCTCCAGGTATCACTATGCACAAATTACCTTTATTCGTATGGGCTGTGCTTATTACCGCTGTACTACTTCTGTTATCATTACCAGTATTAGCAGGTGCGATTACCATGTTACTTACAGATCGTAACTTCAATACCACCTTCTTCGACCCTGCAGGTGGAGGTGATCCTGTGTTATACCAACACCTTTTC
246	455	NCBI;cellular organisms;Eukaryota;Opisthokonta;Metazoa;Eumetazoa;Bilateria;Protostomia;Spiralia;Gnathifera <animals>;Chaetognatha;Sagittoidea;Aphragmophora;Ctenodontina;Sagittidae;	0	0	0	0	0	0	0	0	0	0	0	0	0	0	1	0	0	0	1	1	0	323	0	1	0	0	0	1	0	0	0	0	TTTGTCCACTCTCGGGCATCCCGGGGCTGCTGTAGATCTGGGAATTTTCTCTCTTCACTTAGCAGGGGTTAGAAGGATCCTAGGATCGGCGAACTTTATTACTACAATCTCGAACATGCGACCTGAAGCTCTGACTATAGAACTTATACCATTATTTGTATGATCGGTACTTTTAACCGCGATTCTGCTTCTCTTATCCTTACCGGTGCTAGCTGGGGCCATTACTATGCTATTGACCGACCGTAACTTTAATACGTCTTTCTTCGACCCGGCGGGAGGAGGTGACCCAATTTTATACCAACATCTTTTT
247	460	NCBI;cellular organisms;Eukaryota;Opisthokonta;Metazoa;Eumetazoa;Bilateria;Protostomia;Ecdysozoa;Panarthropoda;Arthropoda;Mandibulata;Pancrustacea;Crustacea;Multicrustacea;Thecostraca;Cirripedia;Acrothoracica;Lithoglyptida;Lithoglyptidae;	0	0	0	0	0	0	1	0	1	0	0	312	1	0	0	0	0	0	0	0	0	0	0	0	0	0	0	0	0	0	0	0	ACTATCAAGAAATATTGCCCATTCAGGAGCATCAGTTGACCTAACAATTTTTTCTTTACATCTAGCGGGTGCCTCATCTATTTTAGGGGCTATTAATTTTATATCAACAGTTATTAACATACGACCTAATAGTATATCCTTTGACCGAATTCCCCTATTCGTCTGAAGTGTTTTTTTAACAGTAATTCTCCTTTTACTTTCACTCCCCGTTCTAGCAGGAGCTATTACTATACTCCTTACCGACCGAAACCTTAACACGTCGTTTTTTGATCCAACAGGAGGAGGTGATCCTATTCTCTATCAACACCTGTTT
248	463	NCBI;cellular organisms;Eukaryota;Sar;Stramenopiles;Ochrophyta;Bacillariophyta;Bacillariophyceae;Bacillariophycidae;	2	0	0	1	22	0	10	16	1	0	110	0	0	7	1	0	10	0	0	1	0	0	1	0	0	5	0	0	0	0	0	0	TCTATCTGGTATTATTGCTCACTCTGGTGGTGCTGTAGATTTAGCTATTTTTAGTTTACATTTATCAGGTGCAGCTTCTATTTTAGGTGCAATTAATTTTATTTGTACTATTGTTAATATGAGAACTGAAAGTCTTCCATTTCACAAGTTACCTTTATTTGTTTGGGCAGTTTTCATCACCGCAATTTTATTATTACTGTCTTTACCAGTATTAGCTGGGGCAATTACAATGTTATTAACTGATAGAAATTTTAATACAACTTTTTTTGACCCTGCTGGTGGAGGTGACCCTGTGCTATATCAGCATCTTTTC
249	466	NCBI;cellular organisms;Eukaryota;Opisthokonta;	7	6	16	1	1	0	0	13	0	0	13	0	0	0	0	0	10	1	3	0	0	108	9	5	0	0	0	0	0	0	0	0	TTTATCATCTAAAACAGGTCAACCAGGTCCAGCAATGGATCTAGCAATATTAAGTTTACACGTAGCTGGAGCCTCATCTATTTTAGGAGCAATAAATTTCATAACTACTATTTTAAATATGAGAACACCAGGAATGACGTTACACAAAATGCCATTATTTTCATGGTCGATATTAGTAACGGCATTTTTACTTTTATTATCTTTACCAGTTTTAGCAGGCGCAATAACAATGCTTCTAACTGATAGGAATTTTGGAACTGCTTTCTTTGAAGCTCAAACAGGGGGAGATCCAGTCCTATTCCAACACTTATTT
250	467	BOLD;Arthropoda;Copepoda;Calanoida;Aetideidae;93.2	0	12	4	3	2	0	0	9	0	0	2	0	2	0	0	5	0	0	3	0	0	103	8	0	0	0	0	0	0	0	0	2	GTTATCTTCTAAGACAGGTCAACCAGGACCAGCAATGGATTTAGCAATTTTAAGTTTACACGTAGCAGGAGCTTCTTCTATTTTAGGAGCAATAAATTTCATAACTACTATTTTAAATATGAGAACACCAGGCATGACGTTACATAAAATGCCATTGTTCTCGTGGTCAATTTTAGTGACAGCGTTTTTACTTTTATTATCTTTACCAGTTTTAGCAGGAGCAATCACAATGCTTCTAACCGATAGAAATTTTGGAACTGCTTTCTTTGAAGCTCAAACAGGAGGAGATCCAGTTTTATTTCAACACTTATTT
251	469	NCBI;cellular organisms;Eukaryota;Sar;Stramenopiles;Ochrophyta;Raphidophyceae;Chattonellales;Chattonellaceae;Chattonella;	5	14	29	0	2	0	0	18	0	0	15	0	9	0	0	0	16	0	1	0	0	68	2	1	2	0	0	0	0	0	0	2	GTTATCTTCTAAGACAGGTCAACCAGGACCAGCAATGGATTTAGCAATTTTAAGTTTACACGTAGCAGGAGCCTCTTCTATCTTAGGGGCAATAAATTTCATCACTACTATTTTAAATATGAGAACGCCGGGTATGACTTTACATAAAATGCCATTGTTCTCGTGGTCAATATTAGTGACAGCGTTTTTACTATTATTATCTTTACCAGTTTTAGCAGGAGCAATTACAATGCTTCTTACAGATAGAAATTTTGGTACTGCTTTTTTTGAAGCTCAAACAGGGGGAGATCCAGTCCTATTCCAACACTTATTT
252	473	NCBI;cellular organisms;Eukaryota;Opisthokonta;Metazoa;Eumetazoa;Bilateria;Protostomia;Ecdysozoa;Nematoda;Chromadorea;Rhabditida;	257	0	1	0	1	0	0	0	2	0	0	23	0	0	0	0	0	0	0	0	0	0	0	0	0	0	0	0	0	0	0	0	TTTGGCTTCTTGGGCTCATCCTGGTCATAGGGTTGATTTAGCTATTTTTTCTCTTCATCTTGCCGGTGCAAGATCTATTCTTGGTTCAATTAATTTTATGACTACTGTAAGAAATCTTCGTAATTCTTCTGTTTCTCTTCAGCAAATATCTCTTTTTGTTTGAACTGTTATTGTTACTACTTTTCTTTTGGTCCTTTCTCTTCCTGTTTTGGCTGGAGGAATTACTATGCTTTTAACTGATCGTAATATTAATACTTCTTTTTTTGATCCTAGGGCTGGTGGTAATGTTATTTTGTATCAGGGTCTCTTT
253	475	NCBI;cellular organisms;Eukaryota;Opisthokonta;Metazoa;Eumetazoa;	0	23	16	0	1	0	0	1	0	1	0	0	3	0	0	1	15	0	13	0	0	21	3	1	0	1	0	0	0	0	0	0	TTTAAGTTCCATTACTGGACATAGTTCTCCTGCTGTTGATATGGCTATTTTTTCACTTCACTTAGCTGGTGCCTCTTCGATATTGGGTGCAGTAAACTTTATTACTACTATTCTTAATATGAGAGCACCTGGTATGACTCTTCATAAAATGCCTTTATTTGCTTGGTCTATGTTAGTAACTGCTTTTCTTCTTTTGTTAGCTGTTCCTGTTTTAGGTGGAGCTATCACTATGCTTTTAACTGATCGTAACTTTGGAACTACATTTTTTGATCCAGCTGGTGGAGGAGATCCTGTTCTTTTCCAACACCTTTTC
254	476	NCBI;cellular organisms;Eukaryota;Rhodophyta;Florideophyceae;Corallinophycidae;Corallinales;Corallinaceae;Corallinoideae;Bossiella;Bossiella dichotoma;	26	213	156	0	7	0	0	0	0	0	2	0	25	0	0	23	102	0	157	0	0	184	276	29	1	0	23	0	86	0	0	22	ATTATCTTCTAAGGCTGGTCAACCAGGTCCTGCAATGGATTTAGCGATTTTGAGTTTACACTTAGCAGGAGCTTCTTCAATTTTAGGTGCAGTTAATTTCATCACTACGATTTTAAATATGAGAACACCTGGAATGACATTACATAAAATGCCTCTATTTGCTTGGTCAATTTTAGTTACTGCATTTTTATTATTATTATCACTACCAGTACTTGCTGGCGCAATAACGATGTTGTTAACAGATAGAAATTTTGGAACCGCCTTCTTTGAGGCTCAGACAGGGGGAGATCCTGTTTTATTTCAACATTTGTTT
255	478	NCBI;cellular organisms;Eukaryota;Viridiplantae;Chlorophyta;Mamiellophyceae;Mamiellales;Mamiellaceae;Micromonas;Micromonas pusilla;	0	1	0	5	2	0	4	74	42	0	165	0	0	0	1	0	3	0	1	0	0	4	0	3	0	0	0	0	0	0	0	0	ACTGAGTCATATTACAAGTCACTCAGGAGGTGCTGTAGATTTAGCTATCTTTAGTTTACACGTTTCAGGTGCAAGTAGTATCTTAGGAGCAATCAATTTTATTACAACCATCTTTAATATGCGTGGACCTGGATTATTAATGCACCGATTACCATTATTTGTATGGAGTGTTTTAATTACAGCATTTTTACTTCTTCTCTCATTACCTGTACTTGCAGGAGCTATTACAATGCTATTAACCGATCGAAACTTTTCAACCAGTTTCTTTGATCCAAGTGGTGGAGGAGACCCTATTCTATACCAACATTTATTT
256	479	NCBI;cellular organisms;Eukaryota;Rhodophyta;Florideophyceae;Rhodymeniophycidae;Ceramiales;	151	0	0	0	0	0	0	106	0	0	0	0	0	0	0	1	0	0	0	0	0	0	0	0	0	0	0	0	0	0	0	0	ATTAAGTTCGATTCAAAGTCATTCTGGGGCTTCAATTGATTTAGCAATTTTTAGCTTACATTTATCAGGAGCATCTTCTATTTTAGGAGCTATTAATTTTATATCAACAATTTTAAATATGCGCAATAATGGCCAAAATATGTACCGAATTCCATTATTTGTTTGATCTATATTTGTAACAGCAATATTATTATTATTAGCAGTGCCTGTTTTAGCGGGGGCCATAACTATGTTATTGACTGATCGTAACTTTAATACTGCATTTTTTGATCCTGCTGGAGGTGGAGATCCTGTTTTATATCAACATCTATTT
257	483	NCBI;cellular organisms;Eukaryota;	0	0	4	1	0	0	7	52	0	0	23	2	0	0	0	0	2	0	1	0	8	0	25	45	1	1	95	0	1	0	0	0	ATTATCAAGTGTTTTAGGTCATTCTGGACCTTCAGTTGATTTAGCAATCTTTAGTTTACACGTTGCTGGAGCTTCTTCAATTATGGGAGCTGTTAATTTTATTACAACTATCTTAAATATGAGAGCTCCTGGATTGACTATGCATAGAATGCCTTTATTCGTATGGTCAGTACTAATTACAGCAGTATTATTATTATTATCTTTACCAGTTTTAGCAGGAGCTATAACTATGTTATTAACTGATAGAAATTTTAATACTTCATTCTTCGATCCAGCAGGAGGAGGGGATCCTATTTTATATCAGCATTTATTC
258	484	NCBI;cellular organisms;Eukaryota;Sar;Alveolata;Dinophyceae;	0	22	0	0	0	0	0	0	18	0	0	1	0	0	0	0	14	0	2	0	0	0	0	0	0	0	0	0	0	0	0	0	ATTAAGTACTTCTTTCATGAGTTTATCACCTTCAAGTACAGCTTTCATAGTCTTTGGATTATTAATCTCAGGTATATCCTCATCTCTTACATCTCTTAACTTTTGGATTACAATTCTAAATATGAGATCTTATTATCTGACATTAAAGACTATGCCCTTATTCCCTTGATCTCTTTTGATAACAGGAGGAATGCTTTTATTAACATTACCAATATTATCTGGAGCTCTTTTAATGGTCTTGGCTGATCTTCATTCTAATACACTTTTCTTTGATCCAATCTTTGGAGGAGATCCTATATTCTATCAACATTTATTT
259	487	NCBI;cellular organisms;Eukaryota;Sar;Stramenopiles;Ochrophyta;Raphidophyceae;Chattonellales;Chattonellaceae;Chattonella;	9	9	12	71	5	0	13	56	55	0	113	1	0	0	1	0	3	0	0	0	4	0	47	28	0	1	39	0	0	0	0	0	ACTAAGTAGTGTTCAAGCACACTCCGGACCTTCTGTAGACTTAGCAATTTTCAGTTTGCATGTATCAGGAGCTGCTTCTATTTTAGGAGCAATTAATTTTATTACAACCATTTTAAATATGAGAGCACCTGGTATGACAATGCATCGATTACCACTTTTTGTTTGGGCTGTATTTATTACTGCAATTTTATTATTATTATCTTTACCAGTTTTAGCAGGAGCCATTACTATGTTATTAACTGATAGAAATTTTAATACAACTTTTTATGACCCAGCAGGAGGAGGAGATCCAGTTCTTTACCAACATTTATTT
260	489	NCBI;cellular organisms;Eukaryota;Sar;Stramenopiles;Ochrophyta;Bacillariophyta;Bacillariophyceae;Bacillariophycidae;Bacillariales;Bacillariaceae;Pseudo-nitzschia;	3	1	28	0	0	0	0	0	0	0	0	0	0	0	0	1	29	0	65	0	0	0	0	0	0	0	0	0	0	0	0	0	TCTTTCAGGTGTTTTATCGCACTCTGGAGGTTCTGTTGATTTAGCGATTTTCAGTCTTCACTTATCAGGAGCAGCTTCAATTTTAGGTGCCATTAATTTCATTTGTACTATTGTAAATATGCGAACTGAAAGTTTACCATTTCATAAACTTCCTCTGTTTGTTTGGGCTGTTTTCATTACTGCTATTTTATTACTATTATCGTTACCGGTTTTAGCAGGTGCTATTACAATGCTGTTAACAGATAGAAATTTTAATACTACTTTTTTTGATCCTGCAGGTGGAGGAGATCCTGTACTTTTCCAGCACTTATTC
261	490	NCBI;cellular organisms;Eukaryota;Rhodophyta;Florideophyceae;Rhodymeniophycidae;Ceramiales;Rhodomelaceae;Polysiphonioideae;Polysiphonia;Polysiphonia sertularioides-2;	0	0	0	0	0	0	249	0	0	0	0	0	0	0	0	0	0	0	0	0	0	0	0	0	0	0	0	0	0	0	0	0	TTTAAGTTCTATACAAAGTCATTCAGGAGCAGCAGTTGATTTAGCAATTTTTAGTTTACATTTATCTGGAGCATCTTCAATTTTAGGAGCAATAAATTTTATATCGACAATTCTAAATATGCGGAATCCTGGACAAACTTTTTATAGAATTCCATTATTTGTATGATCGATTTTTGTAACTGCTTTTTTATTATTACTTGCTGTTCCGGTTCTTGCAGGAGCAATAACTATGTTATTAACAGACCGTAATTTTAATACTTCTTTTTTTGATCCAGCAGGGGGAGGAGATCCGATTCTGTACCAACATTTATTC
262	492	NCBI;cellular organisms;Eukaryota;Opisthokonta;	11	49	57	0	0	0	0	0	0	0	3	0	13	0	0	0	34	0	17	0	0	5	57	3	0	0	13	0	34	0	0	0	ATTATCTTCTAAAGCGGGTCAGCCAGGTCCTGCAATGGATTTAGCAATTTTAAGTTTACACTTAGCGGGAGCTTCTTCAATTTTGGGTGCAGTGAATTTTATCACTACAATTTTAAATATGAGAACACCCGGAATGACTTTACATAAGATGCCATTATTTGCTTGGTCAATTTTAGTAACAGCATTTTTATTATTACTATCCTTGCCGGTGCTTGCAGGTGCAATAACAATGTTATTAACAGATAGGAATTTTGGAACCGCCTTCTTTGAGGCTCAAACTGGAGGTGATCCAGTTTTATTCCAACATTTGTTT
263	497	NCBI;cellular organisms;Eukaryota;Opisthokonta;Metazoa;Eumetazoa;Cnidaria;	0	221	17	0	0	0	0	0	0	0	1	0	38	0	0	14	46	0	3	0	0	38	0	0	0	0	0	0	0	0	0	5	TCTTTCAAGTTCAGCAGGTTCTCCAGGTATGGGTATGGACCTTGCAATATTTTCACTTCATTTAGCGGGCGCATCTTCTATATTGGGTGCAGCAAATTTTATAACAACGATATTTAACATGAGGGCACCAGGAATGACACTTCACAAAATGCCATTATTTGTGTGGTCTATGCTAGTTACAGTGTTTTTGTTATTGTTAGCTATACCTGTTTTGGCTGGCGCCATAACAATGTTACTTACCGATAGAAATTTTGGAACAAGTTTTTTCATTCCTGAAGGTGGTGGTGATCCAATATTATTTTTACACCTTTTT
264	499	NCBI;cellular organisms;Eukaryota;Opisthokonta;Metazoa;Eumetazoa;Bilateria;Protostomia;Ecdysozoa;Panarthropoda;Arthropoda;	1	1	8	0	0	2	0	0	0	0	0	0	0	0	0	0	187	0	71	5	0	0	0	0	0	0	0	0	0	0	0	0	TTTATCGAGTGTTTATGCTCATTCTGGTGCTTCTGTAGATATTTCAATTTTCTCTTTACATCTTGCTGGTGTTTCGTCCATTGCTGGTGCGATTAATTTCATAGTAACTATATACAATATGCGTGCGCGAGGAATGTCTATGCGTCGACTTCCTCTATTTGTTTGATCTATTTTTATTACCGCAATTTTATTATTATTATCTTTACCTGTTTTAGCAGGAAGTATTACAATGTTATTAACAGATCGTAACTTAAACAGCATGTTTTTTGATACTTCAGGAGGTGGAGATCCAGTATTATTTCAACATTTATTT
265	500	NCBI;cellular organisms;Eukaryota;Sar;Alveolata;Dinophyceae;Syndiniales;Syndiniaceae;Hematodinium;	2	109	12	25	0	0	0	5	0	8	2	0	0	0	10	0	27	0	2	0	0	24	0	2	0	0	0	0	0	0	0	0	ATTAAGTACATCATTAATGAGTCTGTCACCTATTGGAATTGATATTTTATTATATGGATTATTATTGTCAGGTATATCATCATGTCTAACATCTATTAATTTCATCGCTACAATTATAAATATGAGATGTTACGGCGTACAATTTTCGATTATGCCAGTATATACATGGTCTATATATATTACAGGATTTCTATTGTTATTAACATTACCTATATTAACAGGAGCTCTTATAATGTTACTAGCAGATCTTCATTATAATACAGTTTTCTTTGATCCAATATTTGGAGGTGATCCTGTACTTTATCAACATTTATTT
266	501	NCBI;cellular organisms;Eukaryota;Sar;Stramenopiles;Ochrophyta;PX clade;Phaeophyceae;Laminariales;Laminariaceae;Laminaria;	0	0	0	0	0	0	15	7	0	0	118	0	0	1	0	0	32	0	26	3	0	0	9	0	0	0	94	0	0	0	0	0	ATTAAGCACTTCTCTAATGACCTTATCACCTGTGACTATAGATCTTATTATTGATGGATTACTTGTGAGCGGTATATCTTCTTTCCTGTCTTCATTAAATTTCATGGGAACTATTAGTAATTTACGTTTATCAGGATTAGTTCTTGCTTACATTCCTTTATTTACCTGGGGTATCATAATAACTGCTCTTTTACTTCTATTGACTCTACCCATCTTGACTGGTGCTTTAGGAGTGGTACTAGGAGATCTTCATTTTAACACCATATATTTTGATTCAGGTTTTGGTGGTGACCCGGTATTGTATCAGCATTTCTTT
267	502	NCBI;cellular organisms;Eukaryota;Opisthokonta;Metazoa;Eumetazoa;Cnidaria;Hydrozoa;Hydroidolina;Leptothecata;Obeliida;Obeliidae;Obelia;Obelia geniculata;	5	66	38	2	1	0	1	17	0	0	9	1	9	0	0	6	22	0	9	0	0	23	7	0	0	0	0	0	0	0	0	0	GTTATCATCTAAAACTGGTCAGCCTGGTCCAGCAATGGATTTAGCAATTTTAAGTTTACACATCGCGGGTGCTTCATCGATTTTAGGAGCAGTGAATTTTATTACAACTATTTTAAATATGAGAACGCCAGGAATGACTTTACATAAAATGCCATTATTTGCATGGTCAGTATTGGTAACAGCATTCTTACTTTTATTATCATTACCAGTTTTAGCAGGTGCAATTACAATGCTATTAACTGATAGAAATTTTGGAACAGCTTTCTTTGAAGCACAAACCGGAGGAGATCCTGTATTGTTCCAACATTTATTC
268	509	NCBI;cellular organisms;Eukaryota;Opisthokonta;Metazoa;Eumetazoa;	0	0	0	0	40	0	0	140	23	0	119	0	0	0	0	0	0	0	0	0	0	0	1	4	0	2	0	0	0	0	0	0	TTTATCAAGTGCTTTAGGACACGCAGGGCCAGCTGTAGATATGGCTATCTTAAGTTTGCATCTTGCCGGAGCTTCCTCAATTTTAGGAGCAATAAATTTTATAACTACTATTTTTAATATGAGAACACCTGGCATGACATTACACAGGATGCCTCTTTTTGTTTGGTCCATTCTGGTTACAGTATTTTTATTAGTCCTTTCATTACCAGTTCTTGCAGGGGCAATTACTATGTTGCTAACAGATAGAAATTTTGGTACTGCTTTTTTTGCTCCAGAAGCAGGCGGAGATCCTATCCTCTTTCAGCATTTATTT
269	510	NCBI;cellular organisms;Eukaryota;	15	62	51	2	0	0	0	0	0	0	11	0	15	0	0	1	46	0	29	0	0	83	27	2	0	0	5	0	0	1	0	0	TTTATCTTCAAAGACAGGTCAGCCAGGTCCAGCAATGGATTTAGCAATCTTAAGTTTACACGTAGCTGGAGCTTCTTCTATTCTAGGAGCAATAAATTTCATTACTACTATTTTAAACATGAGAACACCGGGTATGACTTTACATAAAATGCCATTATTCTCATGGTCGATATTAGTAACGGCGTTTTTACTTTTATTATCTTTACCAGTTTTAGCAGGAGCAATCACAATGCTTCTAACTGATAGAAATTTTGGAACTGCTTTCTTTGAAGCTCAAACAGGTGGAGATCCAGTTCTATTCCAACACTTGTTC
270	512	NCBI;cellular organisms;Eukaryota;Opisthokonta;Metazoa;Eumetazoa;Bilateria;Protostomia;Ecdysozoa;Panarthropoda;Arthropoda;Mandibulata;Pancrustacea;Crustacea;Multicrustacea;Hexanauplia;Copepoda;Neocopepoda;Gymnoplea;Calanoida;Pontellidae;Labidocera;Labidocera acuta;	0	0	0	86	0	0	0	0	0	0	1	0	0	0	0	0	0	0	0	0	0	0	0	0	0	0	0	0	0	0	0	0	GCTGTCTAGAAATATTGCTCATGCGGGAAGGTCAGTAGACTTTGCAATTTTTTCATTACACTTAGCTGGTGTAAGATCAATTTTAGGTGCAGTGAATTTTATTAGAACATTAGGCAATCTTCGTGTTTTTGGAATAATCTTAGACCGAATACCACTATTTGCTTGAGCAGTTTTAATTACTGCCGTTCTATTGCTGCTATCACTTCCTGTGCTAGCTGGCGCAATTACAATACTATTAACTGACCGAAATCTAAATTCATCATTTTATGATGCTAGAGGGGGTGGTGACCCTATCCTTTATCAACACTTATTT
271	513	NCBI;cellular organisms;Eukaryota;Sar;Alveolata;Dinophyceae;	98	0	18	0	14	0	44	47	180	24	35	61	0	3	1	0	28	0	0	0	1	2	0	0	0	60	0	0	0	0	0	0	ATTAAGCACTTCTTTCATGAGTTTATCACCTTCTTCTACAGGAAATCTTATCTTTGGATTATTAATCTCAGGTATATCCTCCTGTCTCACTTCTATTAATTTTTGGATCACTATTCTAAACCTGAGATCTTATTACCTGACATTAAAGACTATGCCATTATTTCCTTGGGCTCTCTTGATTACTGGAGCTATGCTTTTATTAACATTACCAATCTTATCAGGAGCTCTTCTAATGGTCTTGGCTGATCTTCATTCTAATACACTTTTCTTTGATCCAATCTTTGGAGGAGATCCTATATTCTATCAACACTTATTT
272	514	NCBI;cellular organisms;Eukaryota;Sar;Alveolata;Dinophyceae;	10	2	15	3	2	0	89	10	33	2	553	1	0	78	0	0	4	0	2	0	5	0	4	55	0	0	4	1	1	0	0	0	ATTAAGCACTTCTTTCATGAGTTTATCACCTTCAAGTACAGGAAATCTTATCTTTGGATTATTAATCTCAGGTATATCCTCTCTTCTCACATCTCTTAACTTTTGGACAACAATTCTAAATCTGAGATCTTATTATCTGACATTAAAGACTATGCCATTATTCCCTTGGGCTCTCTTGATTACAGGAGGAATGCTTTTATTAACTTTACCAATCTTAACAGGAGCTCTTCTAATGGTCTTGGCTGATCTTCATTCTAATACACTTTTGTTTGATCCAATCTTTGGAGGAGATCCTATATTCTATCAACACTTATTT
273	515	NCBI;cellular organisms;Eukaryota;	0	1	38	0	0	0	0	0	0	0	0	0	5	0	0	0	28	0	37	0	0	4	12	0	0	0	0	0	0	0	0	1	TTTATCAGCTTCTCTTGGAGCCCCAGGACCTGCCGTAGATTTAGCAATTTTCTCTCTGCATATTGCTGGTGCGTCTTCAATACTTGGTGCTATAAATTTTATTACGACAATATTTAATATGAGAGCACCAGGAATGACATTGCATAAAATGCCTTTGTTTGTATGGTCAATTTTAGTAACTGCATTCCTACTTTTACTTTCTCTCCCTGTCTTAGCTGGCGCGATCACAATGCTTCTAACAGATAGAAATTTTGGTACAGCTTTTTTTGAACCTTCAATGGGAGGTGACCCTGTTTTATTCCAGCATTTATTC
274	520	NCBI;cellular organisms;Eukaryota;Opisthokonta;Metazoa;Eumetazoa;Bilateria;Protostomia;Spiralia;Lophotrochozoa;Mollusca;Bivalvia;Autobranchia;Heteroconchia;Euheterodonta;Imparidentia;Gastrochaenida;Gastrochaenoidea;Gastrochaenidae;Lamychaena;Lamychaena hians;	0	0	0	0	0	0	2	0	759	0	0	0	0	0	2	0	0	0	0	0	0	0	0	0	0	0	0	0	0	0	0	0	TATCTAGGGTCGAGGGGCATAGGGGGCCCGCCGTTGATTTTTCAAGGCTGTCTCTTCATGTGGCAGGTGCAGGGTCTCTTGTGGGGGCTTTAAATTTTGTAGGCACCCTCTTTAATGCTCGGGCAAAGAGAATAACCCCGGATAAAGTTACATTATTTGGTTGGTCTATTTTTATGACCGCTAGGATGCTTATTGTAGCTATCCCGGTGTTGGCTAGGGCTATCACAATGCTTCTGTCTGATCGTGGGTTTAATACCTCTTTTTATGATCCAACTGGGTTGGGTGATGTAGTTTTATTTATCCATCTTTTT
275	523	BOLD;Arthropoda;83.17	2	10	16	0	6	0	0	22	0	0	16	0	7	0	0	3	1	0	22	0	0	50	9	6	0	0	0	0	4	0	0	2	ATTATCCTCTAAGACAGGCCAACCTGGTCCAGCAATGGATTTAGCAATATTAAGCTTACACATCGCCGGAGCATCCTCAATTTTAGGAGCAATTAACTTTATTACTACTATTCTAAATATGAGAACTCCTGGAATGACTCTACATAAAATGCCATTATTTGCCTGGTCCATTTTGGTTACAGCATTCCTTCTTCTCTTATCACTTCCAGTTTTAGCAGGCGCAATTACAATGTTGTTAACTGATAGAAACTTTGGAACTGCATTTTTTGAAGCTCAAACAGGTGGTGATCCAGTTCTGTTTCAACACTTATTC
276	525	NCBI;cellular organisms;Eukaryota;Sar;Stramenopiles;Ochrophyta;Bacillariophyta;Coscinodiscophyceae;Thalassiosirophycidae;Thalassiosirales;Thalassiosiraceae;Thalassiosira;Thalassiosira punctigera;	48	0	35	0	0	0	12	0	0	0	107	0	0	0	0	0	25	0	43	0	0	0	18	0	0	1	1	0	0	1	0	0	ATTGTCTAGTGTAACTGCTCACTCAGGAGGTGCTGTTGATTTAGCAATTTTTAGTTTACACCTTTCTGGAGCATCATCCATTTTAGGGGCTATTAATTTCATTTGTACAATTTTCAACATGAGAGTAAAAAGTTTATCATTTCATAACTTGCCATTATTTGTTTGGTCAGTTTTAATTACAGCTTTTTTACTGTTGTTATCATTACCTGTATTAGCAGGAGCAATCACAATGTTACTAACTGATCGAAATTTTAACACTACTTTTTTTGATCCAGCTGGAGGAGGAGATCCAGTATTGTATCAGCATCTTTTC
277	526	NCBI;cellular organisms;Eukaryota;Opisthokonta;Metazoa;Eumetazoa;Bilateria;Deuterostomia;Echinodermata;Eleutherozoa;	0	0	1	0	10	0	2	143	0	0	166	1	0	0	0	0	0	0	20	0	0	0	3	5	0	1	0	0	0	0	0	0	TTTATCACTTCAGGGTGGTAATTCGATGCCGTTTGTTGTTTTTGCTATTCATTTGTTAGGAATCTCGTCAATACTTGGTGCAATAAATGTAATAGCTACTATTTTGAATATGAGAGCACCAGGAATGACGTTAATGAAGATGCCTATGTTCGTATGGACGTGGCTAATTACGGCTTTTCTGCTTATAGCAGCTATGCCAGTTTTAGCAGGAGCAATAACCATGCTATTAACAGATAGATTCTTTGGAACTAGTTTCTTCACCGCTTCTGGTGGAGGCGACCCAGTGATGTTTCAACATATCTTC
278	527	NCBI;cellular organisms;Eukaryota;Opisthokonta;Metazoa;Eumetazoa;Bilateria;Protostomia;Ecdysozoa;Panarthropoda;Arthropoda;Mandibulata;Pancrustacea;Crustacea;Multicrustacea;Thecostraca;Cirripedia;Thoracica;Thoracicalcarea;Balanomorpha;Balanoidea;Balanidae;Balaninae;Balanus;Balanus trigonus;	0	0	242	0	0	0	0	0	0	0	1	0	0	0	0	0	0	0	0	0	0	0	0	0	0	0	0	0	0	0	0	0	TCTCTCTAGAAATATTGCTCATTCAGGAGCTTCCGTAGATTTATCGATTTTTTCTTTACACTTAGCGGGAGCTTCATCAATTTTAGGAGCTATTAATTTTATATCAACTGTTATTAATATGCGAGCTGAAACATTAACATTTGATCGTCTTCCATTATTTGTGTGAAGAGTATTTATTACTGTAATTCTTCTATTACTTTCACTACCAGTATTAGCTGGAGCAATTACAATGTTATTAACTGACCGAAACCTAAATACTTCATTTTTTGACCCAACTGGAGGAGGTGACCCTATCTTATACCAACATTTATTT
279	528	NCBI;cellular organisms;Eukaryota;Opisthokonta;Metazoa;Eumetazoa;	0	0	0	0	0	0	0	0	0	0	1	0	1	0	0	0	14	0	0	0	0	162	0	1	0	0	0	0	0	0	0	1	TCTCTCTAGTAATCTTGGGCATTCTGGTCCTGCTGTCGATATGGCTATACTTAGCTTGCACTTGGCTGGAGCCTCTTCAATTTTAGGAGCAATAAATTTTATTACTACTATTTTTAATATGAGAACTCCTGAAATGACTTTACACAGAATGCCTCTTTTTGTTTGGTCTATATTGGTTACAGTCTTCTTGCTAGTGTTATCATTACCTGTATTAGCAGGTGCGATAACAATGTTATTAACTGATCGTAATTTCGGTACTGCATTTTTCGCTCCTGAAGGCGGAGGAGATCCTATTCTATTTCAGCATTTATTT
280	531	BOLD;Mollusca;78.31	0	0	24	0	0	3	0	0	0	0	0	0	4	0	0	22	13	0	46	2	1	0	196	11	0	0	33	0	21	0	1	5	ATTATCTAACAAACTTGGCCATGCAGGACCATCAGTTGATATGGCAATTTTCGCACTCCATTTAGCTGGTGCTTCTTCAATTCTTGGAGCGGTAAATTTCATAACAACTATTTTAAATATGAGAACCCCAGGAATGACTATACACAAAATGCCTCTTTTTGTATGGGCAATGCTCATTACAGCTTTTTTATTATTACTAGCCGTTCCTGTTCTTGCAGGGGCTATTACTATGCTTCTAACTGATAGAAATTTTGGAACAACATTTTTTAACCCTGCAGGTGGTGGAGATCCAGTTTTATTTCAACACTTATTC
281	532	NCBI;cellular organisms;Eukaryota;Opisthokonta;Metazoa;Eumetazoa;Bilateria;Protostomia;Spiralia;Lophotrochozoa;Sipuncula;Phascolosomatidea;Phascolosomatiformes;Phascolosomatidae;Apionsoma;Apionsoma misakianum;	0	0	0	0	0	0	3	228	2	0	0	0	0	0	0	0	0	0	0	0	0	0	0	0	0	0	0	0	0	0	0	0	GTTATCTGGCGCGTTAGCTCATGCTGGGCCATCAGTAGACCTAGCTATTTTTTCCCTACATCTAGCTGGAGTTAGATCTATTCTTGGTTCCTTAAATTTTATTTCCACAGTAACTAATATGCGCCCAAGGATGTTATCTTGAGAACGAATTCCCCTCTTTGTATGAGCCGCATTTATTACGGTAATTCTATTGCTCCTTTCTTTACCTGTATTAGCAGGTGGAATTACAATATTATTAACCGACCGTAATCTCAACACTACCTTCTTTGACCCAGGAGGAGGAGGAGACCCAGTTCTTTTTAGTCATTTATTT
282	533	NCBI;cellular organisms;Eukaryota;Sar;Alveolata;Dinophyceae;Peridiniales;Heterocapsaceae;Heterocapsa;Heterocapsa circularisquama;	12	0	0	0	0	0	27	16	131	7	33	3	0	54	0	0	0	0	0	0	1	0	0	0	0	130	0	2	0	1	0	0	TCTTTCCACTTCTTTCATGTCTCTATCTCCATCTTCTATTTATTTCCTAGTTGTTGGTCTAGCAATTTCTGGTATTTCTTCTGCTCTAACTTCTCTAAACTTCCTACTAACTATTACTAACATGCGTGTTTACTCTATGTCTCTAAAGCTTATGCCTCTTTTCAATTGGTCTATTCTAATTACTTCTAATCTTCTTCTAATGTGTCTTCCTATTCTTACTGGTGCTCTTATTATGGTTCTTTCTGACCTTAATCTTAATACTCTATTCTATGATCCTGTCTTCGGTGGTGATCCAGTTCTATATCAGCATCTATTC
283	534	NCBI;cellular organisms;Eukaryota;Sar;Stramenopiles;Ochrophyta;PX clade;	0	0	8	9	8	2	2	8	0	0	12	0	4	0	5	1	17	0	4	5	30	0	70	68	0	5	29	2	0	0	0	0	TTTGAGTAGTGTTCAAGCCCATTCAGGTCCTTCTGTGGATTTGGCTATTTTTAGTCTTCATTTGTCAGGGGCAGCATCTATTATAGGAGCGATTAATTTCATTACAACAATTATTAACATACGACCAGGAGGAATGGGAATGCATCGTTTGCCTCTTTTTGTATGGGCAGTTTTGCTAACCGCAATCCTATTGTTGCTTTCTCTTCCTGTCTTGGCTGGGGGTATTACTATGTTGTTGACTGACCGAAATTTTAACACTACCTTTTTTGATCCCGCTGGAGGAGGAGACCCTGTTCTTTATCAACACCTATTT
284	535	BOLD;Arthropoda;Copepoda;89	1	11	17	0	0	0	0	0	0	0	0	0	3	0	0	8	14	0	8	0	0	68	28	0	0	0	6	0	0	0	0	5	TTTATCTTCTAAGACAGGTCAGCCAGGACCAGCAATGGATTTAGCAATCTTAAGTTTACACGTAGCTGGAGCCTCTTCTATTTTAGGAGCAATAAATTTCATTACTACTATTTTAAACATGAGAACACCCGGCATGACTTTACATAAAATGCCATTATTCGCATGGTCGATATTAGTGACAGCGTTTTTACTTTTGTTATCATTACCAGTTTTAGCTGGAGCTATCACAATGCTTCTTACGGATAGAAATTTTGGAACGGCATTCTTTGAAGCTCAAACAGGAGGAGATCCAGTTCTATTTCAGCATTTGTTT
285	537	NCBI;cellular organisms;Eukaryota;Rhodophyta;Florideophyceae;	6	87	35	0	0	0	0	0	0	2	2	0	3	0	0	13	27	0	20	1	0	9	26	7	0	0	1	0	0	1	0	3	ATTATCTTCTAAGGCTGGTCAGCCAGGTCCTGCAATGGATTTAGCAATATTAAGTTTACACTTAGCAGGAGCTTCTTCAATTTTAGGTGCAGTGAATTTCATTACTACAATTTTAAATATGAGAACACCTGGAATGACATTACACAAAATGCCTTTATTTGCTTGGTCAATTTTAGTTACTGCATTTTTATTGTTATTATCTCTTCCAGTACTTGCTGGCGCAATAACGATGTTGTTAACAGATAGAAATTTTGGAACCGCCTTCTTTGAGGCTCAGACAGGAGGAGATCCTGTTTTATTTCAGCATTTATTT
286	539	NCBI;cellular organisms;Eukaryota;Opisthokonta;Metazoa;Eumetazoa;Bilateria;Protostomia;Ecdysozoa;Panarthropoda;Arthropoda;Mandibulata;Pancrustacea;Crustacea;Multicrustacea;Hexanauplia;Copepoda;Neocopepoda;Gymnoplea;Calanoida;Calocalanidae;Calocalanus;Calocalanus plumulosus;	0	0	0	0	0	0	0	0	0	0	0	0	0	0	1	0	2	0	0	0	0	479	0	1	0	0	0	0	0	0	0	0	TTTATCAAGAAATATTGCCCACGCCGGAAGATCTGTTGATTTTGCTATTTTTTCTTTACATTTAGCAGGTGTTAGATCAATTCTTGGAGCAGTAAATTTTATTAGAACATTAGGTAATTTACGTGTATTTGGTATACTGTTAGATCGAATACCTTTATTTGCATGAGCTGTATTAATTACAGCTGTATTATTATTATTATCATTACCAGTACTAGCAGGAGCTATTACAATGTTGCTAACTGATCGAAATTTAAACACTTCGTTTTATGACGTAGGTGGTGGTGGAGATCCTATTTTATATCAACACTTATTT
287	540	BOLD;Arthropoda;83.5	0	4	77	7	57	0	2	75	0	0	95	0	0	0	1	3	13	0	11	1	0	126	54	15	0	0	0	0	0	0	0	8	TTTATCTTCTAAGACTGGTCAGCCAGGCCCAGCAATGGATTTAGCAATATTAAGTTTACATATTGCGGGCGCATCTTCAATTTTAGGAGCAATTAACTTTATCACTACAATTTTAAACATGAGAACCCCCGGAATGACATTGCATAAAATGCCTTTGTTTGCTTGGTCGATTTTAGTTACAGCTTTTCTTCTTCTTTTATCACTTCCAGTTTTAGCAGGAGCCATTACGATGTTGTTAACCGATAGAAACTTTGGAACTGCATTTTTTGAAGCACAAACCGGCGGTGATCCAGTTTTATTTCAACACTTATTT
288	541	NCBI;cellular organisms;Eukaryota;Opisthokonta;Metazoa;Eumetazoa;Bilateria;Protostomia;Spiralia;Lophotrochozoa;Mollusca;Bivalvia;	0	1	0	0	0	0	0	0	0	0	0	0	0	0	0	0	0	0	105	0	0	0	0	0	0	0	0	0	0	0	1	7	TCTTTCTACATATTTGTATCATGGAATGGCTGTGGACTTAGCCATTTTTTCTCTTCATTTAGCTGGATTGGCTTCTATTTTTGGCGGGATTAATTTTATCGTCACAGCTCAAAATATGCGCCGAATGGAAAGTCATTTAATGGATCTTTTTCCTTGGGCAGTTTTGGTGACTGCTGTATTGCTGGTAGTTTCTCTTCCTGTGTTGGCTGGTGGTATTACTATGCTTCTAACTGATCGTCACTTTAACACTAGTTTTTACTTCCCTGGAGGTGGTGGGGATCCTGTACTATTTCAGCATCTCTTT
289	542	NCBI;cellular organisms;Eukaryota;Sar;Stramenopiles;Oomycota;	0	204	17	1	0	0	0	0	0	0	0	0	0	0	0	0	0	0	0	0	0	5	0	0	0	0	0	0	0	0	0	0	ATTATCAAGTGCTCAAGCTCACTCTGGTCCTTCTGTAGATTTAGCTATTTTTAGTTTACACTTAGCAGGTATTTCTTCTATTTTAGGTGCGATTAATTTTATCTCAACTATTTGTAATATGAGATCTCCAGGTTTATACTTCCACAGATTACCTTTATTTGTATGGGCTGTATTTATTACTGCATTCTTATTATTATTATCTTTACCAGTATTAGCAGGTGCTATTACTATGTTATTAACTGATAGAAACTTAAATACTGCTTTCTTCGACCCATCTGGTGGTGGTGATCCAGTATTATATCAACACTTATTC
290	543	NCBI;cellular organisms;Eukaryota;Opisthokonta;Metazoa;Eumetazoa;Bilateria;Protostomia;Spiralia;Lophotrochozoa;Mollusca;Gastropoda;Heterobranchia;Euthyneura <gastropods>;	0	0	5	0	0	0	560	2	1	0	0	0	5	0	0	0	0	0	0	0	3	0	0	0	0	0	0	0	0	0	0	0	CCTTTCAGGTCCTATTGCTCATGGTTCTTGTGCGGTGGATTTGGCCATTTTTTCTCTACACTTAGCAGGGATATCCTCTATTTTAGGTGCCATTAATTTTATTACTACGATTATTAATATACGAGCTCCTGGGATTACCTTTGAGCGTTTAAGTCTATTTGTATGATCTGTATTTGTAACTGCTTTCTTACTTCTACTGTCTCTACCGGTATTAGCAGGGGCTATTACAATGCTATTAACTGATCGTAATTTTAATACAAGCTTTTTTGATCCTGCTGGAGGGGGAGATCCTATCCTGTACCAACACTTATTC
291	544	NCBI;cellular organisms;Eukaryota;Sar;Stramenopiles;Ochrophyta;Bacillariophyta;Coscinodiscophyceae;Chaetocerotophycidae;Chaetocerotales;Chaetocerotaceae;Chaetoceros;Chaetoceros socialis;	1	25	56	0	0	0	0	0	0	0	0	0	0	0	0	0	0	0	105	4	0	1	0	0	0	0	0	0	0	0	0	0	ATTATCTAGCGGAACATCTCATTCAGGAGGTGCTGTAGATCTAGCTATTTTTAGTTTACACTTATCTGGAGCTTCTTCTATTTTAGGAGCAATTAATTTCATTTGTACAATTTTTAACATGCGAGTAAAAAGTTTAGCATTCCATAAATTGCCTTTATTTGTTTGGGCGGTGCTAATAACAGCTTTTTTATTATTGTTATCTTTACCTGTGTTAGCAGGAGCAATTACTATGTTGTTAACTGATAGAAACTTTAATACTACTTTTTTTGATCCTGCAGGAGGTGGAGATCCAGTTTTATACCAACATTTGTTC
292	545	NCBI;cellular organisms;Eukaryota;Rhodophyta;Florideophyceae;Corallinophycidae;Corallinales;Corallinaceae;Corallinoideae;Corallina;unclassified Corallina;Corallina sp. 2frondescens;	10	4	62	5	0	0	0	2	0	0	11	0	2	0	0	135	21	0	12	0	0	0	128	34	0	0	1	0	1	0	0	106	ACTTTCAAATAAACTTGGACATGCAGGTCCTTCTGTTGATATGGCAATCTTTGCATTACATTTAGCAGGAGCCTCTTCAATACTAGGAGCTGTTAATTTTATAACCACAATTCTAAACATGAGAACTCCTGGAATGACCATTCATAAAATGCCGTTATTTGTATGGGCAATGTTAATTACAGCTTTCTTATTATTACTAGCGGTGCCTGTTTTAGCCGGTGCTATCACAATGCTTTTAACTGACAGAAACTTTGGTACAACTTTTTTTAATCCTGCAGGTGGAGGCGATCCAGTTCTTTTTCAACATCTATTC
293	546	NCBI;cellular organisms;Eukaryota;Opisthokonta;Metazoa;Eumetazoa;Bilateria;Protostomia;	2	9	5	0	5	0	0	17	0	0	132	0	1	4	0	7	6	0	0	2	0	143	0	0	0	0	0	0	0	0	0	0	ATTAGCATCTATTGATTTCCATTCAGGAGGTTCAATTGATTTAGCAATTTTTAGTTTACACCTAGCAGGTGCATCATCTATCTTAGGAGCAATGAATTTCATTACTACTATTGTTAACATGCGAGCACCAGGTATGACATTTCATCGATTACCTTTATTTGTGTGAGCGGTTTTCATTACAGCTATCTTATTATTATTAAGTTTACCCGTTTTAGCCGGAGCAATTACAATGCTTCTAACTGACCGTAACTTTAATACTTCTTTCTTTGATCCAGCCGGAGGTGGAGATCCAATTTTATATCAGCACTTATTC
294	548	NCBI;cellular organisms;Eukaryota;Sar;Stramenopiles;Ochrophyta;Bacillariophyta;Bacillariophyceae;Bacillariophycidae;Naviculales;	1	0	0	0	0	0	0	0	0	0	0	0	0	0	0	0	4	0	2	0	0	354	0	0	0	0	0	0	0	0	0	0	TTTATCAGGTATTACTGCGCATTCAGGAGGATCTGTTGACTTAGCTATTTTTAGTTTGCACCTATCGGGAGCCGCTTCTATTTTAGGTGCAATTAATTTCATTTGTACTGTTATTAATATGCGAGCTAAGAACTTAGCATTTCATAGATTACCTTTATTTGTATGGGCATTATTTATTACTGCAATTTTATTGTTGTTGTCCCTTCCAGTATTAGCAGGTGCAATTACTATGCTATTAACTGATCGTAACTTTAATACTACCTTTTTTGATCCTGCAGGAGGAGGAGATCCAGTATTATATCAGCATCTTTTC
295	551	NCBI;cellular organisms;Eukaryota;Sar;Stramenopiles;Ochrophyta;	1	9	4	1	9	0	1	6	14	0	43	0	84	0	0	1	12	0	5	0	0	272	0	0	0	2	0	0	0	0	0	0	TTTAAGTAGTGCTCAGGCTCACTCAGGACCATCTGTTGATTTAGCAATTTTTAGTCTTCACTTATCTGGTGCGGCGTCTATTTTAGGTGCTATTAATTTTATTACTACTATCTTTAATATGAGAGCTCCTGGTATGACAATGCATAGACTTCCATTATATGTTTGGTCAATCTTAATTACTTCTTTTTTACTTTTACTTTCATTACCTGTTTTAGGTGGTGCAATTACTATGCTTTTAACTGATAGAAATTTTAACACCACTTTTTTTGATCCTGCGGGGGGAGGTGACCCAGTTTTATATCAACATTTATTT
296	552	NCBI;cellular organisms;Eukaryota;Opisthokonta;Metazoa;Eumetazoa;Bilateria;Protostomia;Spiralia;Lophotrochozoa;Mollusca;Gastropoda;Heterobranchia;Euthyneura <gastropods>;	0	0	0	0	0	0	0	0	0	0	0	0	0	0	0	0	284	0	0	1	0	0	0	0	0	0	0	0	0	0	0	0	TTTATCTGGGGCTGTTGGGCACGGGGGGTGTTCTGTAGATTTAGCTATTTTTTCGCTTCATTTAGCAGGTATGTCTTCTTTACTTGGTGCAATTAATTTTATTACTACAATTTATAATATACGTTCTCCAGAAATAACAATAGATCGACTAAGTTTATTTGTTTGGTCTGTTTTAGTAACTGCCTTTCTATTGCTTTTATCTCTTCCTGTTTTAGCTGGGGCTATTACTATACTTTTAACAGATCGGAATTTTAATACTAGATTTTTTGATCCGGCTGGAGGTGGTGATCCTATTTTATATCAGCATTTGTTT
297	553	NCBI;cellular organisms;Eukaryota;Rhodophyta;Florideophyceae;Rhodymeniophycidae;Ceramiales;Dasyaceae;	1	1	258	0	0	0	0	0	1	0	0	0	0	0	0	0	0	0	0	0	0	0	0	0	0	0	0	0	0	0	0	0	ATTAAGTTCAATACAAAGTCATTCTGGAGCTTCTGTAGACTTAGCTATTTTTAGTTTACATTTATCTGGAGCTTCTTCAATTTTAGGTGCAATAAATTTTATATCAACTATTTTAAATATGCGAAACCCGGGCCAAAGTTTATATAGGATACCTTTATTTGTTTGATCAATTTTTGTTACTGCATTTTTATTATTATTAGCAGTGCCTGTATTAGCAGGTGCTATTACAATGTTATTAACAGATCGTAATTTTAATACATCATTTTTTGATCCTGCAGGTGGAGGAGATCCTATTTTATATCAACATTTGTTT
298	556	NCBI;cellular organisms;Eukaryota;Sar;Stramenopiles;Ochrophyta;PX clade;Phaeophyceae;Ectocarpales;Chordariaceae;Stilophora;Stilophora tenella;	3	3	61	6	18	0	2	85	0	0	125	0	8	0	1	5	17	0	57	0	0	193	5	5	0	0	0	0	1	0	0	3	ACTCTCAAATAAACTTGGACACGCAGGACCTTCTGTTGATATGGCGATTTTTGCTCTTCATTTAGCAGGCGCCTCCTCAATCTTAGGTGCAGTTAATTTTATAACAACAATACTTAATATGAGAACTCCTGGAATGACTCTGCATAAGATGCCTCTTTTTGTATGGGCTATGTTAATTACAGCATTCTTACTTTTATTAGCTGTTCCTGTTTTAGCTGGAGCAATTACAATGCTTCTAACTGATAGAAACTTTGGTACAACATTTTTTAATCCTGCAGGTGGTGGAGATCCAGTTCTTTTTCAACACTTATTT
299	557	NCBI;cellular organisms;Eukaryota;Sar;Stramenopiles;Ochrophyta;Bacillariophyta;Fragilariophyceae;Fragilariophycidae;Thalassionemales;Thalassionemataceae;Thalassionema;Thalassionema nitzschioides;	0	1	102	8	0	0	0	1	0	0	0	0	0	0	0	0	12	0	24	0	0	0	0	0	0	0	0	0	0	0	0	0	ATTATCTAGCATCATAGCTCATTCAGGTGGATCTGTAGATTTGGCGATTTTCAGTTTACATGTTTCTGGTGCAGCTTCAATTTTAGGAGCAATTAATTTTATTTGTACTATTTTCAATATGCGTGTAAAAAGCTTATCATTTCATAAATTGCCATTATTTGTTTGGGCTATTTTAATTACTGCTGTGCTATTGTTATTATCATTACCTGTCTTAGCAGGAGCAATTACAATGCTATTAACTGACAGAAATTTTAATACAACTTTTTTCGATCCAGCAGGAGGAGGTGATCCTGTCCTGTATCAACATTTATTT
300	559	NCBI;cellular organisms;Eukaryota;Sar;Stramenopiles;Ochrophyta;Bacillariophyta;Mediophyceae;Lithodesmiophycidae;Lithodesmiales;Lithodesmiaceae;	17	0	124	4	0	0	0	0	0	0	0	0	0	0	0	0	67	0	25	1	0	0	0	0	0	0	0	0	0	1	0	0	TTTATCTAGTGCTACGGCGCATTCAGGAGGTGCAGTAGATTTAGCCATATTTAGTTTACATTTATCAGGGGCTTCGTCTATTTTAGGGGCTATTAATTTTATATGTACTATTTTTAATATGCGTGTAAAAAGTTTATCTTTTCATAACTTACCTTTATTTGTTTGGTCAGTTTTGATTACTGCATTTTTATTATTATTATCATTACCTGTATTGGCAGGCGCTATAACAATGTTATTAACTGACAGAAATTTTAATACGACTTTTTTTGACCCTGCAGGGGGAGGAGATCCAGTATTATACCAACATTTATTT
301	561	NCBI;cellular organisms;Eukaryota;Sar;Stramenopiles;Ochrophyta;Bacillariophyta;Fragilariophyceae;Fragilariophycidae;Thalassionemales;Thalassionemataceae;Thalassionema;Thalassionema nitzschioides;	0	0	106	26	0	0	0	0	0	0	0	0	0	0	0	0	12	0	32	0	0	0	1	1	0	0	0	0	0	0	0	0	ACTATCAAGTATAATCGCTCATTCTGGCGGTTCGGTAGATTTAGCAATTTTTAGTTTACATGTTTCTGGAGCAGCTTCAATTTTAGGAGCAATTAATTTTATTTGTACTATTTTTAACATGCGTGTAAAAAGTTTATCATTTCATAAATTACCATTATTTGTTTGGGCTATTTTAATAACTGCCGTTTTACTTCTTTTATCTTTACCTGTTTTAGCAGGGGCAATTACAATGTTATTAACTGATAGAAATTTTAATACAACTTTTTTTGATCCAGCAGGAGGAGGTGATCCGGTGTTATATCAACATTTATTT
302	565	NCBI;cellular organisms;Eukaryota;Rhodophyta;Florideophyceae;Rhodymeniophycidae;Gigartinales;	0	0	237	0	0	0	0	0	0	0	0	0	0	0	0	0	0	0	2	0	0	0	0	0	0	0	0	0	0	0	0	0	TTTAAGTTCAATACAAAGTCATTCAGGCGGCGCTGTTGATTTAGCAATTTTTAGCCTTCATTTAGCAGGAGCTTCTTCAATTTTAGGAGCGGTAAATTTTATCTCTACTATTTTAAATATGCGTAGCCCTGGCCAAAATATGTATAGAATTCCTTTATTTGTATGATCTATTTTTGTTACAGCTTTTTTACTTTTATTAGCAGTTCCTGTTTTAGCTGGTGCAATTACTATGCTTTTAACTGATCGTAATTTTAATACTTCCTTTTTTGATCCTGCAGGTGGTGGAGATCCAGTATTATACCAGCATTTATTT
303	566	NCBI;cellular organisms;Eukaryota;Opisthokonta;Metazoa;Eumetazoa;Bilateria;Protostomia;	0	0	0	0	0	0	0	0	0	0	0	0	0	0	0	0	0	0	0	0	0	0	1	236	0	0	0	0	0	0	0	0	TCTTTCAACTTTGGGCCACCCTGGCGCGGCTGTTGATTTTGGCATTTTTTCTCTTCACCTAGCTGGTGTGTCCTCTATCCTTGGGTCTATTAACTTTATTACTACTATTGCCAATATACGTGGAAGGGGTCTATCGTTAGAAATTATACCTTTGTTTGCCTGGTCAGTGCTACTAACAGCCTTTCTACTTCTTCTATCACTTCCTGTTTTGGCAGGTGCCATTACTATGTTATTAACCGATCGCAATTTTAATACTTCCTTCTTTGATCCTGCAGGTGGCGGTGATCCTATTTTATATCAGCATCTCTTT
304	567	NCBI;cellular organisms;Eukaryota;Sar;Alveolata;Dinophyceae;	9	0	74	23	0	0	31	13	10	2	272	16	0	3	0	0	6	0	6	0	4	5	1	4	0	4	3	0	2	0	0	0	ATTAAGCACTTCTTTCATGAGCTTATCACCTTCAAGTACAGGAAATCTTATCTTTGGATTATTAATCTCAGGTATATCCTCATGTCTCACATCTCTTAACTTTTGGACAACAATTCTAAATCTGAGATCTTATTATCTTACATTAAAGACTTTACCATTATTCCCTTGGGCTCTCTTGATTACTGGAGGAATGCTTTTATTAACTTTACCAATCTTATCAGGAGCTCTTCTAATGGTCTTGGCTGATCTTCATTGTAATACTCTTTTCTTTGATCCAATCTTTGGAGGAGATCCTATATTCTATCAACACTTATTT
305	569	NCBI;cellular organisms;Eukaryota;Sar;Alveolata;Dinophyceae;	0	134	0	0	0	0	0	0	0	0	0	0	0	0	0	0	7	0	0	0	0	0	0	0	0	0	0	0	0	0	0	0	ACTAAGCACTTCTTTCATGAGTTTATCACCTTCAAGTGTTGCTTATCTTTCCTTTAGCTTGTTAATGTCAGGTATGTCCTCATGTCTCACAGCACTTAACTTTTGGACAACAATTCTAATTCTAAGATCTTATTGCTTGAGCCTTAGGACTCTGCCATTATTACTTTGGTCTCTCTTATTAACTGCAGGAATGCTTCTGTCAACATTGCCAATCTTATCAGGTGCTCTTCTAATGGTTTTGGCTGATCTTCTCTCAAATTCACTTTTCTTTGATCCTTTATTTGGAGGAGATCCTATATTCTATCAACACATCTTT
306	571	NCBI;cellular organisms;Eukaryota;Opisthokonta;Metazoa;Eumetazoa;	0	0	0	0	0	0	0	0	0	0	0	0	0	0	0	1	241	0	5	0	0	0	0	0	0	0	0	0	0	0	0	0	TTTATCTACAAGTGAATTCCATTCTGGGGCTTCGGTAGACTTAGCTATTTTTAGTCTACATATTGCAGGTGCTTCATCGATTGCAGGTGCAATAAATTTTATTACAACTATATTTAATTGTCGCGCACGGGGTATGACTTTAGTCCGTATGCCTTTATTCGTATGAGCTGTTTTAATAACAGCATTTTTGTTATTATTATCTTTACCTGTATTAGCAGGAGCTATAACTATGTTATTAACTGATCGAAATATAGCTACAAGTTTTTTTGATCCAGCAGGCGGTGGTGATATAATATTATATCAACATTTATTT
307	574	NCBI;cellular organisms;Eukaryota;Opisthokonta;Metazoa;Eumetazoa;Bilateria;Protostomia;Spiralia;Gnathifera <animals>;Chaetognatha;environmental samples <arrow worms,phylum Chaetognatha>;Chaetognatha environmental sample;	0	10	2	0	0	0	0	0	0	0	0	0	12	0	0	1	0	0	0	0	0	66	1	0	0	0	0	0	0	0	0	0	TTTATCTTCTAAGACAGGTCAGCCAGGTCCAGCAATGGATTTAGCAATTTTAAGTTTACACGTAGCCGGAGCTTCTTCTATTTTAGGGGCAATTAATTTCATAACTACTATTTTAAATATGAGAACACCTGGTATGACTTTACATAAAATGCCATTATTCTCATGGTCAATATTAGTAACAGCATTTTTACTTTTATTATCTTTACCAGTTTTAGCAGGAGCAATCACAATGCTTCTGACAGACAGAAATTTTGGAACTGCCTTCTTTGAAGCTCAAACAGGGGGAGATCCAGTTCTATTCCAACACTTGTTT
308	578	NCBI;cellular organisms;Eukaryota;Opisthokonta;Metazoa;Eumetazoa;Cnidaria;Anthozoa;Hexacorallia;Scleractinia;Astrocoeniina;Pocilloporidae;Stylophora;Stylophora pistillata;	0	0	3	253	0	0	0	9	0	0	0	84	0	0	1	0	0	0	0	0	0	0	0	0	0	0	0	0	0	0	0	0	TTAAGCAACTTTCTGTTTCATAGTGATGTGAGTGTAGATTTAGCTCTTTTTGGACTTCATTTGGCAGGGGCCTCTTCTGTTTTAGGAGCGATTAACTTTATTACCACCATCTTTAATATGCGTGCGCCAGGGATGACCCTCCATAAAATGCCTTTGTTTGCATGGTCGATCCTTGTGACGGCCTTTTTATTATTGCTGACAATTCCTGTATTGGCAGGCGCAATTACAATGTTGATTACAGATCGTAATTTTGGGACAAGCTTTTTTGATCCTGCTGGTGGAGGTGATCCTGTTTTATTCCAGCACCTCTTT
309	579	NCBI;cellular organisms;Eukaryota;Opisthokonta;Metazoa;Eumetazoa;Bilateria;Protostomia;Ecdysozoa;Panarthropoda;Arthropoda;Mandibulata;Pancrustacea;	0	0	0	0	0	0	0	0	0	0	0	0	0	0	0	0	0	0	85	0	0	0	0	0	0	0	0	0	0	0	0	7	TCTTTCGGCAGCAATTGCCCATGCCGGTGCCTCTGTTGATTTAGGGATCTTCTCATTACATTTAGCAGGGGTTTCTTCTATTTTAGGTGCTGTAAATTTTATAACAACAGTGATTAACATGCGTCCCCAAGGTATAACAATAGACCGAATACCTTTATTCGTATGATCAGTTTTTATTACCGCTATTTTATTACTTCTTTCTCTCCCTGTATTAGCTGGGGCTATTACAATATTGTTAACAGATCGTAACTTAAATACCTCTTTTTTTGACCCAGCAGGAGGAGGAGACCCTGTATTATACCAACATTTATTT
310	580	NCBI;cellular organisms;Eukaryota;Sar;Stramenopiles;Ochrophyta;Bacillariophyta;	0	0	119	13	0	0	0	0	0	0	0	0	0	0	0	0	12	0	1	0	0	0	9	0	0	0	0	0	0	0	0	0	ATTATCAAGTGCAACAGCTCATTCAGGAGGTTCTGTAGATTTAGCAATATTTAGTTTACATTTATCTGGTGCATCTTCTATTTTAGGTGCAATCAATTTTATTTGTACAATTTTTAACATGCGAGTAAAAAGTTTATCTTTCCATAACTTACCTTTATTTGTGTGGTCTGTTTTAATTACAGCTTTTTTATTGTTATTATCTTTGCCAGTATTAGCTGGAGCAATTACAATGTTGTTAACAGATAGAAATTTCAATACAACTTTCTTTGATCCTGCTGGTGGCGGTGATCCTGTATTATTTCAGCATCTTTTC
311	581	NCBI;cellular organisms;Eukaryota;Opisthokonta;Metazoa;Eumetazoa;	0	0	0	0	0	0	0	0	0	0	0	0	0	0	0	0	0	0	0	0	0	0	0	0	0	1	0	0	236	0	0	0	TTTATCATCATCTATTACCCATTCCGGAGGTGCGGTTGATTATGCTATCTTTAGTTTACATATCGCAGGTGTTTCTTCAATTGGAGGTTCTATAAACTTTATCGTAACTATTGTTAATATGCAATGTAACGGTATGGGTAATTCAAAGTTACCTTTATTTGTTTGAAGTGTTTTAGTAACTACTATTCTTTTATTACTTTCATTACCAGTTTTAGCTGGTGCTATAACAATGTTATTAGTTGATAGAAATTTTAATGGAAATTTTTTTGAAGCTGAAGGAGGTGGAGACCCTGTTCTTTATCAACATTTATTT
312	582	NCBI;cellular organisms;Eukaryota;Opisthokonta;Metazoa;Eumetazoa;Bilateria;Protostomia;Ecdysozoa;Panarthropoda;Arthropoda;Mandibulata;Pancrustacea;Crustacea;Multicrustacea;Hexanauplia;Copepoda;Neocopepoda;Gymnoplea;Calanoida;Eucalanidae;Subeucalanus;Subeucalanus pileatus;	0	26	331	0	0	0	0	0	0	0	0	0	0	0	0	0	0	0	0	0	0	12	0	0	0	0	0	0	0	0	0	0	CCTGTCTAGAAACATCGCCCATGCTGGGGGGTCGGTGGACTTTGCCATTTTTTCACTTCATTTAGCTGGGGTCAGATCTATTTTAGGGGCTGTGAATTTTATCAGGACCGTGAGTAACCTACGCGCGTTTGGTATACTGTTTGACCAGATACCTTTGTTTGCGTGGTCTGTTGTTATTACTGCTGTATTACTATTATTATCTCTACCTGTGTTAGCAGGGGCCATCACAATATTATTAACAGATCGTAACCTGAACACGTCTTTTTATGACGTTGGGGGGGGAGGGGACCCCATTCTTTATCAGCACTTATTC
313	584	NCBI;cellular organisms;Eukaryota;Opisthokonta;Metazoa;Eumetazoa;Bilateria;Protostomia;Ecdysozoa;Panarthropoda;Arthropoda;Mandibulata;Pancrustacea;	0	0	0	0	0	0	14	0	0	0	0	0	0	0	0	0	0	0	0	0	0	0	0	1	0	0	0	0	0	0	0	0	TTTAAGAACTTTTATATTTCATGGAGGAGCATCAGTTGATTTTACCATTTTTAGCTTGCATTTAGCAGGAGTATCTTCTCTTTTAGGGGCCGTTAATTTTATTACTACTGTTCTTAATTTGCGTACTTTGGGTATACTTATAGATCGTATGCCCTTATTTCCTTGGGCGGTTTTTATCACAGCTATTTTACTTCTTCTTTCTTTACCAGTTTTAGCTGGGGCTATCACTATACTTCTTACTGACCGAAACTTGAATACTTCTTTTTATGATCCTATAGGAGGAGGTGACCCAGTTTTATACCAACACCTATTC
314	585	NCBI;cellular organisms;Eukaryota;Sar;Stramenopiles;Ochrophyta;Bacillariophyta;Mediophyceae;	0	0	8	3	0	0	0	0	0	0	0	0	2	0	0	0	0	1	11	0	0	0	0	0	0	0	0	0	0	2	0	0	TTTATCTAGTGGTACTGCTCATTCTGGAGGAGCTGTAGATTTAGCTATTTTTAGTTTACATGTCTCTGGGGCTTCTTCTATTCTAGGTGCTATTAATTTTATTTGTACTATTTTTAATATGAGAGTAAAAAGTTTATCATTTCATAAGTTACCGTTATTTGCTTGGTCAGTTCTGATAACTGCATTTTTGTTATTATTGTCATTACCAGTTTTAGCGGGTGCTATTACAATGCTTTTAACAGATAGAAATTTTAATACTACGTTCTTTGACCCAGCGGGTGGAGGAGATCCAATTTTATATCAACATTTATTT
315	586	NCBI;cellular organisms;Eukaryota;Sar;Stramenopiles;Ochrophyta;Bacillariophyta;Coscinodiscophyceae;	0	72	0	0	7	0	0	0	0	0	2	0	5	0	0	0	5	0	0	0	0	0	0	0	0	0	0	0	0	0	0	0	TTTATCTAGTGCAAGTGCTCATTCAGGAGCATCGGTTGATTTAGCCATTTTTAGTTTACATTTGTCAGGTATCGCTTCGATTTTAGGAGCTGTTAATTTTATTAGTACTATTTTTAATATGCGAGTTAAAGGTCTGTTAATGCATAGACTACCTTTATTTGTGTGGGCTATTTTAATAACAGCTTTTTTATTATTACTTTCTTTACCTGTATTAGCGGGAGCGATTACAATGCTACTGACAGATAGAAACTTCAATACAACCTTTTTTGATCCAGCTGGTGGTGGTGATCCTGTTCTATATCAACATTTGTTT
316	588	NCBI;cellular organisms;Eukaryota;Sar;Alveolata;Dinophyceae;	0	0	0	0	0	0	0	0	0	0	0	2	0	1	0	0	0	0	0	0	1	0	0	2	1	0	31	270	0	1	0	0	ATTAAGCACTTCTTTTATGAGTTTATCACCTTCAAGTACAGGAAATCTAATCTTTGGATTATTAATGTCAGGTATATCCTCATGTCTCACATCTCTTAACTTTTGGATCACAATTCTAAATCTGAGATCTTATTATCTGACATTAAAGACTATGCCATTATTCCCTTGGGCTCTCTTGATAACAGGAGGAATGCTTTTATTAACATTACCAATCTTATCAGGAGCTCTTCTTTTAGTCTTGGCTGATCTTCATTCTAATACACTTTTCTTTGATCCAATCTTTGGAGGAGATCCTATATTATATCAACATTTATTT
317	595	BOLD;Mollusca;81.93	11	25	2	0	0	0	0	1	0	0	79	1	0	0	0	0	32	0	0	0	0	37	0	0	0	0	0	0	0	0	0	0	ATTAGCAAATTCTTTATATCATTCAGGTCCTTCAGTAGATTTAGTGATATTTAGTTTACATATCGCGGGTATCTCGTCAATTTTAGGTGCTGTAAACTTTATTACTACTATTTTAAACATGCGTTGTCCAGGTATGAGTTTGTTTAAAATGCCTTTATTTGTTTGGTCAGTTTTAGTAACAGCATTTTTATTACTTTTATCGTTACCGGTATTAGCTGGGGCTATTACTATGGTATTAACCGATCGTCATTTTAATACAACTTTTTTTGATGCAAAAGGAGGAGGTGATCCTGTATTATATCAGCATTTATTC
318	597	NCBI;cellular organisms;Eukaryota;Sar;Stramenopiles;Ochrophyta;Bacillariophyta;	0	0	4	0	0	0	0	0	0	0	0	0	0	0	0	0	8	0	2	0	0	0	0	0	1	0	0	0	0	0	0	0	TCTTTCTAGCGGAACTTCTCACTCAGGAGGTTCTGTAGATTTAGCTATTTTTAGTTTACACTTATCAGGTGCATCGTCTATTTTAGGTGCAATCAATTTTATTTGTACTATTTTTAATATGAGAGTAAAAAGTTTAGCTTTTCATAAGTTACCTCTTTTTGTTTGGGCTGTTTTAATTACAGCGTTTTTGTTATTGTTATCGTTACCTGTGTTAGCTGGAGCAATCACTATGCTATTAACTGATAGAAATTTTAACACTACTTTTTTTGATCCAGCAGGTGGTGGTGATCCAGTTTTATACCAACATTTATTT
319	599	NCBI;cellular organisms;Eukaryota;Sar;Stramenopiles;Ochrophyta;Bacillariophyta;	1	1	0	0	0	0	0	0	0	0	1	0	0	0	0	1	0	0	0	0	0	0	0	0	0	0	0	0	0	0	0	0	TTTATCGAGCGGAACCTCACATTCAGGTGGGGCTGTTGATTTAGCAATTTTTAGTTTACATTTATCAGGAGCATCTTCTATTTTAGGTGCAATAAACTTTATATGTACTATATTTAATATGCGTGTTAAAAGTTTATCGTTTCATAAATTACCTTTGTTTGTATGGGCTGTTTTAATAACAGCTTTTCTGTTATTACTATCATTACCTGTATTAGCTGGTGCGATTACAATGTTATTAACAGATAGAAATTTTAATACAACTTTTTTTGATCCTGCAGGTGGTGGAGATCCTGTTTTATATCAACATTTATTT
320	601	BOLD;Mollusca;84.34	0	0	0	0	0	0	0	0	0	0	0	0	0	0	0	0	0	0	0	0	0	2	0	0	0	0	0	0	0	0	0	0	TCTATCAGGTATAATAGCCCATGCAGGAATGGGAATGGACCTGTTGATACTTTCTCTTCATGTATCAGGAGTTAGTTCATTATTTGCAGCTATTAACTACATGTCCACTATAGCTTGTATGAGATGCCCAGGAATGGAGTGACCTAACCTACCGATTTTTGTTTGATGTTTGTTTATAACATCATTTTTATTAATAGCTTCTCTCCCTGTATTAGCAGGTGCATTAACTATGCTCTTAACAGATAGACATTTTAATACAAATTTTTTCGACCCTTCCGGGGGAGGAGATCCAATTTTATATCAACATTTGTTT
321	606	NCBI;cellular organisms;Eukaryota;Opisthokonta;Metazoa;Eumetazoa;Bilateria;Protostomia;Spiralia;Lophotrochozoa;Mollusca;Gastropoda;Heterobranchia;Euthyneura <gastropods>;Panpulmonata;Eupulmonata;Stylommatophora;Helicina <clade>;Clausilioidea;Clausiliidae;Phaedusinae;Megalophaedusa;Megalophaedusa pinguis;	0	0	1	0	0	0	0	0	0	0	0	0	0	0	0	2	0	0	0	0	0	0	252	12	2	0	46	0	0	0	0	0	ACTCTCGAGTTCGTCTGGCCATCCGGGGCCGGCTGTTGATCTAGTGATCTTCAGTTTGCATCTAGCTGGAGCTTCATCAATCCTTAGCTCAATTAATTTTATCACGACTATTTTGAATATGAGGGCGCCAGGGTTGACCCTGCATAAGATGCCGCTCTTTGTATGGTCCATTTTGGTTACAACGTTTTTGTTGCTCTTGTCTTTGCCGGTCCTGGCTGGTGCAATCACCATGCTTTTGACAGATAGGAATTTTGGAACAGCCTTTTTTGAAGCTTCGAGGGGGGGGGATCCGCTTCTATTCCAGCACTTATTT
322	607	NCBI;cellular organisms;Eukaryota;Sar;Stramenopiles;Ochrophyta;PX clade;Phaeophyceae;Ectocarpales;Acinetosporaceae;Acinetospora;Acinetospora asiatica;	0	18	0	0	7	0	0	10	0	0	32	3	9	0	0	0	3	0	0	0	0	46	0	0	0	0	0	0	0	0	0	0	ATTAAGTTCTATTCAAGCGCACTCTGGACCATCTGTTGATTTAGCCATTTTTAGTTTACACGTGAGTGGTGCATCTTCGATTTTAGGAGCAATTAACTTTATTACTACTATTTTCAACATGCGTGCTCCAGGTATGACAATGCACCGCTTACCATTAATGGTATGGGCTGTATTAATTACTGCGTTTTTATTACTGTTATCTCTACCAGTTCTTGCTGGAGCGATTACCATGTTATTAACAGACCGTAACTTCAATACAACTTTCTTCGATCCAGCTGGTGGTGGTGACCCAGTTTTATATCAACACCTTTTC
323	609	NCBI;cellular organisms;Eukaryota;Sar;Alveolata;Dinophyceae;	2	0	9	118	37	0	18	15	67	6	117	7	0	1	16	0	0	0	0	0	0	0	4	0	0	33	0	0	0	0	0	0	ATTATCTACTTCTTTTATGTCTTTATCACCTTCAAGTACAGGAAATCTAATATTTGGATTATTAATATCTGGTATATCTTCATGTCTGACTTCTCTTAATTTCTGGATTACAATTCTAAATTTAAGATCTTATTATTTGACATTAAAAACTATTCCATTATTTCCTTGGGCTTTCTTAATTACTGCTTTTATGCTTTTATTAACATTACCCATTTTATCTGGTACACTTCTTTTAATATTGGGTGATCTTCATTCTAATACACTTTTCTTTGATCCTACTTTTGGAGGAGATCCTATATTCTATCAACATTTATTT
324	612	NCBI;cellular organisms;Eukaryota;Sar;Alveolata;Dinophyceae;	1	0	1	0	0	0	0	0	0	0	0	0	0	0	1	0	0	0	0	0	68	227	1	1	0	0	2	4	0	0	0	0	ATTAAGCACTTCCACATTGAGCTTATCACCTTCAAGTACAGGAAATCTTATCTTTGGATTATTAATCTCTGGTATATCCTCATGTCTCACATCTCTTAACTTTTGGACAACAATTCTAAATCTGAGATCTTATTATCTGACATTAAAGACTATGCCATTATTTTCTTGGGCTCTCTTGATTACAGGAGGAATGCTTTTATTAACATTACCAATCTTATCAGGAGCTCTTTTAATGGTCTTGGCTGATCTTCATTCTAATACACTTTTCTTTGATCCAATCTTTGGAGGAGATCCTATATTCTATCAACACTTATTT
325	613	NCBI;cellular organisms;Eukaryota;Opisthokonta;Metazoa;Eumetazoa;Bilateria;Protostomia;Spiralia;Gnathifera <animals>;Chaetognatha;Sagittoidea;	0	5	1	0	0	0	0	0	0	0	0	0	1	0	245	0	1	0	0	0	0	0	0	0	0	0	0	0	0	0	0	0	ACTTTCTACAATAGGCCATTCTGGAGCCGCCGTTGATTTAGGGATTTTTTCTCTTCATTTGGCTGGTGTAAGTAGAATTTTGGGTAGTGCTAATTTTATCACTACTATTTATAACATACGTTCGGTCGGTCTATCTATAGAATACCTACCGCTTTTTGCTTGATCGGTTCTTCTGACCGCCATCCTTCTTTTATTGTCCCTTCCAGTATTGGCAGGAGCCATTACTATGTTATTAACAGATCGAAACTTTAATACAACCTTTTTTGACCCTGCTGGTGGTGGTGATCCTATTTTATACCAACATCTATTC
326	617	NCBI;cellular organisms;Eukaryota;Rhodophyta;Florideophyceae;Nemaliophycidae;Acrochaetiales;Acrochaetiaceae;Rhodochorton;unclassified Rhodochorton;	6	14	0	0	0	0	0	0	0	0	0	0	0	0	0	0	44	0	0	0	9	50	0	0	0	0	0	0	0	0	0	0	ACTATCAGGAATTTTAGCCCACTCAGGTGGTGCAGTTGACTTAGCAATTTTTAGTCTACATTTAGCTGGTGTGAGTTCAATTTTAGGTGCAATCAATTTTATTGTAACAATTTTGAACATGAGATGCCCTGGAATGACCGCGCATCGTACGCCTTTGTTTGCATGAGCAGTCTTCATAACTGCTTTTTTACTTCTTCTGTCACTTCCAGTTTTAGCTGGGGCAATCACAATGCTTCTTACTGACCGAAACTTTAATACATCGTTCTTTGATCCAAGTGGTGGTGGTGACCCTGTATTATATCAGCATCTTTTT
327	618	NCBI;cellular organisms;Eukaryota;Opisthokonta;Metazoa;Eumetazoa;Bilateria;Protostomia;Spiralia;Gnathifera <animals>;Chaetognatha;environmental samples <arrow worms,phylum Chaetognatha>;Chaetognatha environmental sample;	0	3	7	0	0	0	0	5	0	0	1	0	2	0	0	3	5	0	0	0	0	37	3	0	0	0	0	0	0	0	0	3	TTTATCTTCTAAGACTGGTCAACCTGGACCTGCTATGGATTTAGCAATTTTAAGTTTACACGTTGCAGGAGCTTCATCAATTTTAGGAGCTATTAATTTTATAACTACAATTTTAAACATGAGAACCCCTGGCATGACATTACACAAGATGCCATTATTCTCTTGGTCAATATTAGTAACAGCATTTTTACTTTTATTATCATTACCAGTTTTAGCTGGAGCGATTACTATGCTTCTTACAGATAGAAACTTTGGAACGGCATTCTTTGAAGCACAAACAGGTGGCGATCCAGTTTTATTCCAGCACTTATTT
328	619	NCBI;cellular organisms;Eukaryota;Opisthokonta;Metazoa;Eumetazoa;Bilateria;Deuterostomia;Echinodermata;Eleutherozoa;Asterozoa;Ophiuroidea;	0	0	1	0	0	0	0	0	0	0	0	0	0	0	0	0	0	0	108	0	0	0	0	0	0	0	0	0	0	0	2	15	CTTATCAGGCCCAGCCGCCCACGCAGGGGGCTGCGTAGACCTAGCTATCTTCTCCCTACATCTCGCAGGGGCCTCCTCAATTATGGCCTCCATTAATTTTATGACCACAATAATAAAAATGCGAGCGCCCGGTATGACCATGGATCGCATGCCCCTTTTCGTTTGGTCTATCTTTATAACAACCATACTTCTTCTTCTCTCACTCCCAGTCTTAGCCGGGGCAATAACCATGCTTCTAACTGACCGAAACATAAAAACCACATTCTTCGACCCAACTGGAGGGGGAGACCCAATCCTATTTCAACACCTCTTC
329	620	NCBI;cellular organisms;Eukaryota;Rhodophyta;Florideophyceae;Corallinophycidae;Corallinales;	0	1	195	0	0	0	0	0	0	0	1	0	0	0	0	0	0	0	4	0	0	0	0	0	0	0	0	0	0	0	0	0	TTTAAGTTCTATTCAAAGCCATTCAGGAGCAGCAGTTGATTTAGCTATTTTTAGTTTACATTTATCAGGAGCTTCTTCTATTTTAGGAGCTGTTAATTTTATATCAACAATTTTAAATATGCGTAATCCTGGTCAAAGTATGTATAGAATACCACTATTTGTTTGGTCAATTTTTGTTACAGCTGTTTTATTACTTTTAGCAGTTCCTGTGTTAGCAGGAGCTATTACAATGTTGTTAACTGATAGAAATTTTAATACTTCGTTTTTTGACCCTGCAGGTGGAGGAGATCCTATCTTATATCAACATTTATTT
330	623	NCBI;cellular organisms;Eukaryota;Opisthokonta;Metazoa;Eumetazoa;	0	0	1	0	31	0	0	68	19	1	98	0	1	0	1	1	1	0	0	1	0	36	0	1	0	0	0	0	0	0	0	0	TCTCTCTAGTAATCTCGGACATTCTGGTCCTGCTGTTGATATGGCTATACTTAGCTTGCACTTGGCTGGAGCCTCTTCAATTTTAGGAGCAATAAACTTTATTACTACTATTTTTAATATGAGAACTCCTGAAATGACTTTACACAGAATGCCTCTTTTTGTGTGGTCTATTTTAGTTACAGTTTTCTTACTAGTACTATCATTACCTGTATTAGCAGGTGCGATAACAATGTTACTAACTGATCGCAATTTCGGCACCGCATTTTTCGCTCCTGAAGGCGGAGGAGATCCTATTTTATTTCAGCATTTATTT
331	624	NCBI;cellular organisms;Eukaryota;Opisthokonta;Metazoa;Eumetazoa;Bilateria;Protostomia;	0	0	0	0	1	5	1	1	1	1	0	2	1	382	2	0	0	0	0	0	0	1	0	0	0	0	0	1	0	0	0	0	TTTGTCGTCGAATTTAGCCCACAGGGGGCCAAGGGTGGACTTTGGGATTCTTTCACTTCATTTGGCCGGAATTTCCTCAATTCTAGGGGCAATCAACTTTATCTCCACAATTATTAATATGCGTTCTGAGGGTATAACGTGAGAGCGAGTTCCTCTGTTTGTATGATCCATTTTAGTAACTGCAGTGTTATTACTACTATCACTCCCGGTCCTAGCAGGGGCCCTTACAATGTTGCTTACGGACCGAAATTTCAACACTACTTTTTTTGACCCGGCAGGAGGAGGCGACCCCATTCTATACCAGCACCTATTC
332	625	NCBI;cellular organisms;Eukaryota;Sar;Stramenopiles;Ochrophyta;Bacillariophyta;Bacillariophyceae;Bacillariophycidae;Naviculales;Pinnulariaceae;Pinnularia;	0	0	0	0	0	0	0	0	0	0	0	0	0	0	0	0	0	0	1	0	0	0	0	0	0	1	317	0	0	0	0	0	ACTGTCAAGTATTACCGCTCATTCTGGAGGCTCCGTAGACTTGGCTATTTTTAGTTTGCACCTATCAGGAGCTTCTTCTATTCTAGGTGCGATCAATTTTATTTGCACAATAACAAACATGAGAACCCAGAACTTAGCCTTTCATAGACTCCCTTTATTTGCATGGGCAATTTTTATAACAGCATTTTTACTTCTTCTTTCTTTACCTGTGCTTGCAGGAGCCATCACAATGCTATTAACTGATCGAAATTTCAACACTACTTTTTTTGATCCAGCAGGAGGAGGCGACCCTGTACTTTACCAACATTTATTC
333	631	NCBI;cellular organisms;Eukaryota;Sar;Alveolata;Dinophyceae;	1	137	8	1	6	54	0	16	0	0	53	0	31	0	0	0	37	1	9	1	0	176	107	2	0	0	10	0	51	0	0	1	ATTAAGCACTTCTTTCATGAGTTTATCACCTTCAAGTACAGCTTATCTTATCTTTGGATTATTAATGTCAGGTATATCCTCAGTTTTGACATCTGTTAACTTTTGGATAACAATTCTTAACTTGAGATCTTATTATCTGACATTAAAGACTATGCCATTATTCCCTTGGTCTCTCTTGATAACAGGAGGAATGCTTTTATTTACATTACCAGTCTTATCAGGAGCACTTCTAATGGTCATTGCTGATCTTCATTCAAATACACTTTTCTTTGATCCAATCTTTGGAGGAGATCCTATATTCTATCAACACTTATTT
334	632	NCBI;cellular organisms;Eukaryota;Opisthokonta;Metazoa;Eumetazoa;Bilateria;Protostomia;Ecdysozoa;Panarthropoda;Arthropoda;Mandibulata;Pancrustacea;	0	0	0	0	0	0	0	0	0	0	221	0	0	0	0	0	0	0	0	0	0	0	0	0	0	0	0	0	0	0	0	0	TTTAAGAAGAGGATTAGCTCATGCTGGTGCTTCAGTGGACTTAGCAATTTTTTCTCTTCATCTAGCAGGAATTTCTTCTTTATTAGGGGCTGTGAATTTTATTAGAACTTTGGCTAACTTACGAGCCTTAGGTGTATTGTTAGAACGAATACCTTTATTTAGATGGTCTGTTCTAACTACGGCTGTTCTTCTTCTTTTGTCACTTCCTGTTTTAGCAGGAGCTATTACAATGCTTTTAACAGATCGTAATTTAAATACTTCATTTTATGACCCAAGAGGAGGTGGAGATCCTATTCTTTATCAGCACCTATTT
335	634	NCBI;cellular organisms;Eukaryota;Opisthokonta;Metazoa;Eumetazoa;Bilateria;Protostomia;Ecdysozoa;Panarthropoda;Arthropoda;	0	0	0	0	1	0	0	0	0	0	0	0	1	0	0	0	0	2	0	0	1	0	0	380	10	0	0	0	0	0	0	1	TTATCTAGAAATATTGCTCATGCAGGAAGATCAGTGGATTTTGCTATTTTTTCTTTACATTTAGCAGGGGTAAGATCTATTTTGGGAGCTGTAAATTTTATTAGAACATTAGGAAATTTACGAGTATTTGGAATATTATTAGATCGAATACCTTTATTTGCTTGAGCTGTTTTAATTACAGCAATTTTATTACTATTGTCTTTACCTGTATTAGCAGGAGCTATTACTATATTATTAACGGATCGAAATTTAAATACATCTTTTTATGATGTGGGGGGAGGAGGAGATCCTATTTTATATCAACATTTATTT
336	636	NCBI;cellular organisms;Eukaryota;Opisthokonta;Metazoa;Eumetazoa;Bilateria;Protostomia;Ecdysozoa;Panarthropoda;Arthropoda;Mandibulata;Pancrustacea;Crustacea;Multicrustacea;Hexanauplia;Copepoda;Neocopepoda;Gymnoplea;Calanoida;	0	0	0	0	0	0	0	1	2	0	0	0	0	165	0	0	0	0	0	0	0	0	0	0	0	0	0	0	0	0	0	0	TCTTTCGAGGAATATTGCCCATGCAGGCAGATCAGTTGATTTTGCAATCTTCTCACTACATTTAGCTGGTGTAAGATCGATTCTAGGTGCCGTCAATTTCATTAGAACACTGGGTAATTTGCGAGTGTTCGGAATAATTTTAGACCGTATACCATTATTTGCATGAGCCGTTCTCATTACGGCGGTACTGCTTCTATTATCTCTACCTGTATTGGCAGGAGCAATTACTATATTGCTAACAGACCGAAATCTTAATTCTTCATTTTACGATGCTAGAGGTGGAGGAGATCCCATCCTGTACCAACACTTATTT
337	639	NCBI;cellular organisms;Eukaryota;Opisthokonta;Metazoa;Eumetazoa;	0	0	0	0	0	0	0	0	0	0	0	0	1	0	0	357	5	0	0	0	0	0	52	1	1	0	25	0	0	0	0	677	TTTATCTAATAAGCTTGGGCATGCTGGACCTTCTGTTGATATGGCAATTTTTGCACTTCATTTAGCTGGAGCTTCTTCTATTCTGGGGGCAGTAAATTTCATAACCACTATATTAAATATGAGAACTCCTGGTATGACCATTCATAAAATGCCTCTTTTCGTATGGGCCATGTTAATCACTGCATTTCTATTATTACTTGCAGTACCTGTTTTAGCTGGAGCAATTACAATGCTTCTGACGGATAGAAATTTTGGCACTACATTTTTTAACCCGGCGGGTGGTGGAGATCCAATTTTATTTCAACACTTATTT
338	642	NCBI;cellular organisms;Eukaryota;Sar;Stramenopiles;Ochrophyta;	0	52	0	0	0	0	0	5	0	0	7	1	0	0	0	0	6	0	0	0	0	32	0	2	0	0	0	0	0	0	0	0	GTTAAGTAGTGTACAAGCTCACTCTGGACCTGCTGTAGATTTAGCGATTTTTAGCTTACACTTATCTGGTGCGTCTTCTATTTTAGGTGCTATTAATTTTATTACAACTATTTTCAATATGAGAGCGCCTGGTATGTCAATGCACAGATTACCATTAATGGTTTGGTCTGTACTAATTACCGCGTTTTTATTATTATTATCTTTACCTGTTTTAGCTGGTGCGATTACCATGTTACTTACAGATAGAAATTTTAATACAACTTTCTTCGACCCTGCTGGAGGAGGAGATCCTGTGTTATACCAACACTTATTC
339	645	NCBI;cellular organisms;Eukaryota;Opisthokonta;Metazoa;Eumetazoa;Cnidaria;Anthozoa;Hexacorallia;Actiniaria;Nynantheae;Metridiidae;Metridium;	1	0	5	0	0	0	0	2	0	0	0	0	0	1	0	82	2	0	0	0	0	0	0	7	0	0	0	0	0	0	0	108	TTTATCCTCTACAGTAGGACATGCTTCGCCAGCCGTAGATATGGCTATTTTGTCACTTCATTTAGCTGGTGCTTCATCAATTTTAGGGGCAATCAACTTTATTACGACAATCTTTAATATGAGAGCTCCAGGAATGACTTTACACAAAATGCCATTATTTGTTTGGTCTATTCTTGTTACCGTATTTTTACTAGTTCTATCCCTTCCTGTTCTAGCAGGTGCTATAACCATGCTATTAACCGACAGAAACTTTGGAACTGCGTTTTTTGCACCTGAATTAGGTGGTGATCCAATGCTGTTTCAGCATTTATTT
340	646	BOLD;Cryptophyta;79.08	7	1	0	0	0	0	0	0	0	0	1	0	0	0	0	0	34	0	0	0	0	0	0	0	0	1	0	0	0	0	0	0	ATTAAGTAGCATTAGTGCTCACCCAGGTGGTGCAGTAGATTTAGCAATTTTTAGTTTACACGTTTCAGGTGCATCTTCAATACTTGGGGCTGTCAACTTTATTACGACAATCTTCAATATGAGATGTCCAGGTATGACAATGCATAGAGTTCCATTATTTGTATGGGCAGTATTGATTACAGCGTTTTTGTTATTATTATCATTACCTGTTCTGGCAGGTGCTATTACAATGTTACTTTGTGATCGAAATTTTAACACTACGTTTTTTGATCCTTCAGGTGGAGGGGATCCTGTATTGTACCAACATCTCTTC
341	648	NCBI;cellular organisms;Eukaryota;Opisthokonta;Metazoa;Eumetazoa;Bilateria;Protostomia;Spiralia;Lophotrochozoa;Mollusca;Gastropoda;	0	0	0	0	0	0	177	1	0	0	0	0	0	0	0	0	0	0	0	0	1	0	0	0	0	0	0	0	0	0	0	0	TCTATCAGGCAACGTGTCACAAAGAGGGATTTCAATAGACCTTGCTATCATGGCACTCCACATGGCAGGGTTGTCGTCTATTCTGGGGGCGATTAATTTTCTCTCTACGATTTATAATATGCGCAATGAGGGTATGACTCCTGAGCGCATTCCTTTATTCGTGTGATCGGTTGCGGTGACGGCATTTCTGCTGGTAGTTTCCTTACCAGTCCTAGCAGGAGCTATTACTATGCTGTTAACTGATCGAAACTTTAATACGACTTTCTTTGATCCAGCGGGAGGGGGTGATCCTATTTTGTATCAGCATCTGTTT
342	649	NCBI;cellular organisms;Eukaryota;Opisthokonta;Metazoa;Eumetazoa;Bilateria;Protostomia;Ecdysozoa;Panarthropoda;Arthropoda;Mandibulata;Pancrustacea;	85	9	3	10	24	0	0	0	0	0	14	0	1	0	0	1	53	0	0	0	0	12	3	0	0	8	0	0	0	0	0	0	TCTTAGCAGTATTGAAGCTCATTCTGGAGGTTCAGTCGACCTGGCTATTTTTAGTCTACATTTGGCAGGAGCTTCGTCGATATTGGGGGCAGTTAACTTTATAACCACAATCTTCAATATGCGTCTTCCAGGTATGACGCTCCACCGCATGCCGCTGTTTGTTTGGTCCGTATTAATAACGGCCTTCCTTTTATTGCTATCTCTACCTGTTCTTGCTGGAGCAATTACAATGCTTCTGACTGATAGAAACTTCAACACGTCCTTCTTTGATCCAGCAGGCGGTGGAGATCCAATTCTCTACCAACATCTCTTC
343	650	BOLD;Cnidaria;80.61	3	21	4	4	2	0	2	1	0	0	16	0	5	0	0	0	18	0	1	1	0	108	0	0	0	0	0	0	0	0	0	0	ACTATCAAGTGTTCAAGCTCACTCAGGGCCTTCTGTAGACCTTGCAATATTTAGTTTACACTTAGGTGGAACATCTTCTATTTTAGGTGCTATTAATTTCATAACTACAATAATTAATATGCGTAGTCCTGGTATGTCTATGCATAAATTACCACTTTTTGTGTGGTCTGTATTAATTACAGCCGTGCTATTACTTTTATCATTACCAGTATTAGCAGGTGCAATTACTATGCTGTTAACTGATCGTAATTTTAATACAACTTTCTTTGATCCTGCCGGAGGCGGAGACCCTGTGTTATACCAACACTTATTC
344	651	NCBI;cellular organisms;Eukaryota;Sar;Stramenopiles;Ochrophyta;Bacillariophyta;	8	0	0	0	0	0	0	0	0	0	0	0	0	0	0	23	67	0	6	0	1	0	1	0	0	0	0	0	0	0	0	0	TCTTTCGAGTGCAACCGCTCATTCTGGAGGTTCTGTAGATTTAGCAATCTTTAGTTTACATGTTTCTGGAGCGTCGTCTATTTTAGGTGCAATTAATTTTATTTGTACTATTTTTAATATGCGAGTTAAATCTTTATCTTTTCACAATTTACCATTATTTGTGTGATCTGTGTTAATTACTGCTTTTTTATTATTGTTATCTTTACCTGTTTTAGCTGGAGCTATTACTATGTTGTTAACAGATAGAAATTTTAATACTACCTTTTTTGATCCAGCTGGTGGTGGTGATCCAGTGTTATTTCAACATCTTTTC
345	653	NCBI;cellular organisms;Eukaryota;Opisthokonta;Metazoa;Eumetazoa;Cnidaria;Hydrozoa;Hydroidolina;Leptothecata;Lafoeidae;Lafoea;Lafoea dumosa;	0	0	0	0	0	0	0	0	0	0	0	0	0	0	0	117	0	0	0	0	0	0	2	0	0	0	0	0	0	0	0	208	ACTATCTAATAAACTTGGTCATGCAGGACCATCGGTTGATATGGCAATTTTTGCACTTCATTTAGCCGGAGCTTCTTCAATACTGGGAGCAGTGAATTTCATTACAACTATTTTAAATATGAGAACGCCAGGAATGACTATTCACAAAATGCCTCTTTTTGTATGGGCAATGCTCATTACTGCGTTCCTATTATTACTTGCTGTTCCTGTTCTTGCAGGTGCTATTACTATGCTTCTTACTGATAGAAATTTTGGGACTACATTCTTTAATCCTGCGGGTGGTGGAGATCCAGTTTTATTTCAACACTTATTT
346	654	NCBI;cellular organisms;Eukaryota;Sar;Stramenopiles;Ochrophyta;Bacillariophyta;Coscinodiscophyceae;	0	34	1	0	0	0	0	0	0	0	0	0	0	0	0	1	0	0	0	0	0	0	0	0	0	0	0	0	0	0	0	0	TTTATCCAGCATTACAGCCCATTCCGGTGGGGCTGTAGATTTAGCTATTTTTAGTTTACATTTGTCCGGAGCATCTTCAATTTTAGGAGCTATCAATTTTATTTGTACGATAGTGAATATGAGAGCTAAAAATATTGCTTTTCATAGATTACCTTTATTTGTTTGATCTGTTTTAATTACTGCATTTTTACTATTATTATCTTTACCGGTATTAGCTGGCGCTATTACAATGTTATTAACTGATCGTAATTTTAACACTACTTTTTTTGATCCTGCAGGAGGAGGAGATCCAGTCCTTTACCAACACCTTTTT
347	656	NCBI;cellular organisms;Eukaryota;Opisthokonta;Metazoa;Eumetazoa;Bilateria;Protostomia;Spiralia;Lophotrochozoa;Mollusca;Gastropoda;Heterobranchia;Euthyneura <gastropods>;Panpulmonata;Eupulmonata;Stylommatophora;Helicina <clade>;Helicoidea;Hygromiidae;Hygromiinae;Monachoides;Monachoides incarnatus;	0	0	0	0	0	0	0	0	0	0	0	0	0	0	0	9	0	0	3	1	0	0	205	11	0	0	38	2	17	0	0	27	ATTAGTATTACAACTAGGAGACGGATTGCCTTATTTAGTTTTTGCAGTGCATTTTCTGGGTGTGTCATCAATTATGGGGGCAATAAATATTATCGCGACGGTTTTTAATATGCGAGCACCAGGGATGACTTTTATGAGACTGCCTTTGTTTGTTTGGACCTGGATTATTACCGCCTTCTTATTAATTGCGTCCATGCCGGTATTGGCTGGCGCGGTAACAATGCTATTAACTGATAAATTTTTCGGCACAGCATTTTTCGATGCAGCAGGCGGCGGTGATCCGGTAATGTTTCAACATATCTTT
348	658	NCBI;cellular organisms;Eukaryota;Rhodophyta;Florideophyceae;Rhodymeniophycidae;	3	4	27	0	0	17	0	0	0	0	0	0	0	0	0	0	2	0	1	0	0	10	9	0	0	1	0	0	12	0	0	2	GTTATCATCTAAGACAGGACAACCTGGTCCAGCAATGGATTTAGCAATATTAAGCTTACATATTGCAGGAGCCTCTTCAATTTTAGGGGCGATTAACTTCATAACTACAATTTTAAATATGAGAACTCCTGGAATGACACTACATAAGATGCCTTTGTTTGCCTGGTCGATTTTAGTTACAGCATTTCTTCTTCTTTTGTCACTTCCAGTTTTAGCAGGTGCAATTACTATGTTATTAACTGATAGAAACTTTGGAACTGCATTTTTTGAAGCACAAACAGGCGGTGACCCAGTTTTATTCCAACACCTATTC
349	661	BOLD;Ochrophyta;Raphidophyceae;86.32	1	0	0	0	2	0	0	16	0	0	25	0	3	0	0	0	7	0	0	0	0	73	0	0	0	0	0	0	0	0	0	0	ATTAAGTAGTGCACAGGCACACTCAGGTCCGTCTGTAGATCTTGCAATTTTTAGTTTACATTTATCTGGAGCTGCTTCTATTTTAGGTGCCATTAATTTTATTACAACTATTTTCAATATGAGAGCTCCCGGTATGAGTATGCATAGACTTCCTTTATATGTGTGATCAGTTTTAGTTACTTCTTTTCTATTATTATTATCTTTACCTGTTTTAGCAGGAGCTATTACTATGCTTTTAACAGATAGAAATTTTAATACTACTTTTTTTGATCCTGCTGGAGGAGGAGATCCGATTTTATTTCAGCACTTGTTT
350	663	BOLD;Chlorophyta;83.67	0	1	1	0	0	0	0	0	0	0	14	0	0	0	0	0	17	0	2	0	53	0	57	1	0	0	58	0	0	0	0	187	TTTATCAGGTATAGAAGCCCATTCAGGTGCGTCTGTAGATTTAGCAATTTTTAGTTTACATATTGCAGGTGCTTCTTCGATTATGGGTGCTATTAACTTTATGACTACTATTTTAAATATGAGAGCACCTGGTATTGAAATGCACAGATTACCTTTATTTGTGTGGTCAGTATTTATTACTGCAGTTTTATTGTTATTATCATTGCCGGTATTAGCAGCGGCTATTACAATGTTATTAACAGATAGAAATTTCAATACAACATTCTTTGATCCAGCAGGTGGTGGTGATCCTATATTGTATCAGCATTTATTC
351	667	NCBI;cellular organisms;Eukaryota;Sar;Stramenopiles;Ochrophyta;PX clade;Phaeophyceae;Ectocarpales;	0	0	0	0	0	0	0	0	0	0	0	0	0	0	0	0	1	0	0	1	0	0	118	3	0	0	101	0	0	0	0	0	ATTATCAAGTGTACAGGCTCATTCAGGGCCTTCAGTAGATTTAGCTATTTTTAGTCTACACTTAGCAGGTGCGTCTTCTATTTTAGGAGCTATTAACTTTATTACAACTATTTTTAACATGCGGTCTCCGGGTATGAAAATGCATAACATGCCGCTAATGGTATGGGCTGTTTTAGTCACTGCCTTTTTACTTCTTCTATCATTACCTGTTTTAGCAGGTGCTATTACAATGTTATTAACTGATAGAAATTTCAATACAACCTTCTTTGATCCAGCAGGAGGAGGGGATCCTGTATTATACCAACATTTATTT
352	668	NCBI;cellular organisms;Eukaryota;Rhodophyta;Florideophyceae;Nemaliophycidae;Nemaliales;Galaxauraceae;Dichotomaria;Dichotomaria obtusata;	8	11	9	0	0	0	0	0	1	0	0	0	7	0	0	3	22	0	10	0	0	26	0	0	0	0	0	0	1	0	0	0	TCTTTCAAGTAATTTGGGACATTCAGGTCCTGCTGTTGACATGGCTATATTAAGTTTACATTTGGCAGGAGCTTCATCTATTCTAGGAGCAATAAATTTTATTACAACTATTTTCAATATGAGAACTCCCGAGATGACATTGCATAGAATGCCTTTATTTGTCTGGTCCATTTTGGTTACAGTCTTTTTATTAGTATTATCTTTGCCCGTGTTAGCAGGAGCAATTACAATGCTTTTGACTGACCGTAATTTTGGAACGGCATTTTTTGCTCCAGAGGGGGGAGGTGATCCTATTTTATTTCAGCATTTATTT
353	670	NCBI;cellular organisms;Eukaryota;Rhodophyta;Florideophyceae;Rhodymeniophycidae;	2	5	23	0	0	0	0	0	0	0	0	0	5	0	0	0	8	0	2	0	0	13	52	5	0	1	5	0	0	0	0	0	GTTATCTTCCAAGACAGGTCAACCTGGTCCAGCAATGGATTTGGCAATATTAAGTTTGCACATCGCGGGAGCATCCTCAATTTTAGGAGCAATTAATTTTATAACTACAATCTTAAATATGAGAACTCCAGGAATGACATTACACAAAATGCCTTTGTTTGCTTGGTCTATTTTGGTTACAGCATTCCTGCTTCTTTTATCTCTCCCAGTTTTGGCTGGCGCTATTACCATGCTTTTAACTGATAGAAATTTTGGTACTGCATTCTTTGAGGCACAAACAGGTGGTGACCCAGTTCTATTTCAACACTTATTC
354	674	NCBI;cellular organisms;Eukaryota;Opisthokonta;Metazoa;Eumetazoa;	0	0	0	0	0	0	0	0	0	0	0	0	0	0	0	0	1	0	0	0	0	0	170	19	0	0	23	0	0	0	0	0	ACTCTCGAGTTCGTCTGGTCATCCGGGGCCGGCTGTTGATCTAGTGATCTTCAGTTTGCATCTAGCGGGAGCTTCATCAATCCTTAGCTCAATTAATTTTATCACGACTATTCTGAATATGAGGGCGCCCGGGTTGACCCTGCATAAGATGCCGCTCTTTGTATGGTCTATTTTGGTTACAACATTTTTGTTGCTCCTGTCTTTGCCGGTTCTGGCTGGTGCAATTACTATGCTTCTGACAGATAGGAATTTTGGAACAGCGTTTTTTGAAGCTTCAATGGGGGGAGATCCGCTTCTATTCCAGCATTTATTT
355	675	NCBI;cellular organisms;Eukaryota;Opisthokonta;Metazoa;Eumetazoa;Cnidaria;Hydrozoa;Hydroidolina;	0	0	0	0	0	0	0	0	0	0	0	0	0	0	0	0	0	2	0	0	0	0	0	0	1	0	0	0	330	0	0	0	TTTATCATCATCAATAGGGCATGCTGACCCTTCAGTTGATATGGCAATACTATCTATACACCTGGCAGGGGCTTCATCAATATTGGGAGCAATAAATTTTATTACTACTATATTTAATATGCGTGCACCTGGAATGACTCTACATAAAATGCCATTATTTGTTTGGTCTATATTGGTGACTGTGTTTTTATTAGTTCTTTCTCTTCCTGTTTTAGCAGGGGCTATTACTATGTTACTTACTGACCGTAATTTTGGTACAGCATTTTTTGCTCCAGAACTTGGCGGAGATCCTTTATTATTTCAACATCTTTTC
356	678	NCBI;cellular organisms;Eukaryota;Opisthokonta;Metazoa;Eumetazoa;Bilateria;Protostomia;	0	0	0	0	0	0	0	0	0	0	0	0	0	0	1	0	0	0	0	0	0	0	0	0	0	0	0	0	0	0	217	0	TCTGAGGGGAAACATTGCTCACGCTGGTGCCTCTGTGGATTTTGCCATTTTTTCTTTACATTTAGCTGGGGTGTCTTCTTTAATAGGCGCAGTAAACTTTATTAGAACCTTAGGAAACTTGCGAGTGATTGGGATAGTAGCTGATCGAATACCGCTATTTGCTTGATCTGTTCTGGTCACAGCAATTTTATTACTTTTATCCTTGCCTGTCTTAGCAGGAGCAATTACTATGTTACTAACTGATCGAAATTTTAACACGTCTTTCTACGACCCTAGGGGTGGAGGAGACCCTCTATTATATCAACATCTTTTT
357	679	BOLD;Cnidaria;78.31	2	22	16	0	0	0	0	0	0	0	0	0	4	0	0	0	7	0	25	0	0	0	19	7	0	0	9	0	0	0	0	1	ATTATCATCAAAAACTGGACAGCCTGGGCCAGCGATGGACTTAGCTATTTTAAGTCTTCATGTTGCTGGAGCTTCATCAATTCTAGGGGCTATAAATTTTATTACCACAATTTTAAACATGCGAGCTCCTGGTATGACATTGCATAAAATGCCTTTGTTCTCTTGGTCAATACTTGTTACTGCATTTTTACTTTTACTATCACTACCTGTTCTAGCCGGCGCTATAACTATGCTTTTAACTGATAGAAATTTTGGTACAGCTTTTTTTGAGGCACAAACTGGAGGGGACCCTGTGCTTTTCCAACATTTATTT
358	680	NCBI;cellular organisms;Eukaryota;Sar;Stramenopiles;Ochrophyta;Bacillariophyta;Coscinodiscophyceae;Rhizosoleniophycidae;Rhizosoleniales;Rhizosoleniaceae;Guinardia;	3	2	15	0	0	0	0	1	0	0	0	0	2	0	0	0	106	0	18	0	0	17	0	0	0	0	0	0	0	0	0	0	ACTATCTAGTGGTAATTCACATTCAGGAGCTTCTGTAGATTTAGCTATTTTTAGTTTACATTTATCAGGAGCTGCGTCTATATTAGGGGCTATAAATTTTATATGTACTATATTAAATATGCGTGTAAAAGGTTTATTTATGCATAGACTACCTTTGTTTGTTTGGGCTATTTTAATTACTGCGGTATTATTATTATTATCATTACCTGTTTTAGCAGGAGCTATTACTATGCTGTTAACTGATAGAAATTTCAATACTACTTTTTTTGACCCTGCAGGAGGTGGTGACCCTGTTTTATACCAACATTTATTT
359	684	NCBI;cellular organisms;Eukaryota;Opisthokonta;Metazoa;Eumetazoa;Bilateria;	0	209	0	0	0	0	0	0	0	0	0	0	0	0	0	0	0	0	0	0	0	0	0	0	0	0	0	0	0	0	0	0	GGTGTCTAGCGTGACTGGTCACCCTGGTGCTTGTGTGGATTGTGTTATCTTTGCCCTTCACCTAGCTGGTGCATCTTCTATTATGAGGGGTATTAATTTTATAACAACTGTATTAGTGTTTGGTAGTGATGCGTATCGCATGGATGTCTTCTTATGAGCCTTTTTTATTACTGTATTCCTTTTGGTGCTATCATTGCCAGTATTAGCTGCTGGTATTACCATATTGTTATTTGATCGTAATGTTAATGCTATATTCTTTGGTGAAATTGGTGGTGGTGATCCTGTATTATTCCAACACTTGTTT
360	687	NCBI;cellular organisms;Eukaryota;Opisthokonta;Metazoa;Eumetazoa;Bilateria;Protostomia;Ecdysozoa;Panarthropoda;Arthropoda;Mandibulata;Pancrustacea;Crustacea;Multicrustacea;Hexanauplia;Copepoda;Neocopepoda;Podoplea;Cyclopoida;Oithonidae;Oithona;unclassified Oithona;Oithona sp. AC-2016;	0	0	0	0	0	0	1	0	0	0	0	0	0	0	0	1	1	1	0	0	0	0	0	105	0	0	0	0	0	0	0	0	TTTGAGATCGTACTTATACCATGGGGGTGCTTCAGTAGATTATGCTATTTTTAGACTTCATTTAGCAGGAATTTCTTCTTTACTTGGGGCAGTAAATTTTATTAGAACTATCTTAAATTTACGAGTTTTAGGTATAAGTCTAAATTTGATACCTTTATTTCCTTGAGCTGTATTAATTACTGCAATTCTTTTATTACTATCTCTCCCTGTTTTAGCTGGTGCAATTACTATACTTTTAACAGATCGAAATTTAAGAACTTCATTTTATGATTCATTAGGGGGAGGTGATCCTGTCCTCTATCAACATTTATTT
361	688	NCBI;cellular organisms;Eukaryota;Opisthokonta;Metazoa;Eumetazoa;Bilateria;	0	0	0	0	0	0	0	0	0	0	0	0	0	0	0	0	0	0	0	0	0	0	0	0	0	0	0	0	256	0	0	0	TCTTTCCAACGCGGATTATCATCCCACGCCGGCTGTCGACATGGCTATCCTCAGTTTACATTTAGCCGGCGCTTCTTCTATTCTTGGAGCCATTAATTTCATTACAACAATTATTAACATGCGTGCGCCGGGTATGACGTTTCATCGTATGCCACTGTTTATTTGGGCATCCCTGATTACGGCCTTCCTTTTGTTGTTAGCGATCCCTGTCTTAGCCGGTGCTTTGACGATGCTTCTAACCGATCGCAACTTTGGTACTACTTTCTTTGAAGCTTCTGGCGGCGGAGACCCCATCTTTTGGCAGCATCTCTTT
362	689	NCBI;cellular organisms;Eukaryota;Opisthokonta;Metazoa;Eumetazoa;Bilateria;Protostomia;Spiralia;Lophotrochozoa;Mollusca;Bivalvia;Autobranchia;Pteriomorphia;Pectinida;Pectinoidea;Spondylidae;Spondylus;Spondylus sinensis;	0	1	1	0	0	0	0	0	0	0	3	0	0	0	0	1	0	0	105	0	0	0	0	0	0	0	0	0	0	0	0	0	CCTTTCAAACTCTGAGTATCATTCTGGGGTTTGTCCGGATATAATGATCTTAGGGTTGCATTTAGCAGGCGTTAGGTCTACTGCTGGAGCAATTAATTATTTAGCTACGTTTTTTAACAGTCGTGGGAATTTATATACGGCAGAGAAATGTCCCCCTTTTGTTTGGGCTATTGTAGTAACTAGGGTTTTGTTAGTGGTGTCCCTTCCGGTGTTAGCGGGGGGGCTAACAATGCTTTTATTGGATCGACATTTTAATTGTAGATTTTTTGATCCTGTAGGGGGAGGTGATCCTGTGCTGTTTCAGCACTTGTTT
363	690	NCBI;cellular organisms;Eukaryota;Sar;Alveolata;Dinophyceae;Syndiniales;Syndiniaceae;Hematodinium;	11	23	1	0	0	18	0	0	0	0	49	0	1	0	0	0	6	0	6	1	0	2	43	1	0	10	315	5	0	1	0	0	ATTAAGTACATCATTAATAAGTCTATCACCTATTGGAATTGATATTTTATTATATGGATTATTATTATCAGGTATATCATCATGTCTAACATCTATTAATTTTATCGCTACAATTATAAATATGAGATCTTATAGTATTACATTATCGATTATGCCTGTATATACATGGTCTATAAATATTACAGGATTTCTATTGTTATTAACATTACCTATATTAACAGGAGCTCTTATAATGTCGTTAGCAGATCTTCATTATAATACAGTTTTCTTTAATCCAATATTTGGAGGCGATCCTGTACTTTATCAACATTTCTTT
364	696	BOLD;Ochrophyta;79.74	3	19	0	0	0	0	0	2	1	0	0	0	0	0	0	3	31	0	0	1	0	1	0	0	0	0	0	0	0	0	0	0	TTTAAGTAGCATTAGTGGTCATCCAGGAGGAGCTGTAGATTTAGCAATTTTTAGTCTTCATGTTTCTGGTGCGTCTTCAATTCTTGGTGCTGTAAATTTTATTACAACAATTTTTAATATGAGAGCGCCTGGAATGACTATGCACAGATTACCATTATTTGTGTGGGCAGTTTTAATTACTGCGTTCCTTTTATTATTGTCGTTACCTGTTTTAGCTGGAGCGATCACTATGTTACTTTGTGATCGTAATTTTAACACTACATTTTTTGATCCTTCAGGTGGTGGTGACCCTGTTTTATACCAACATTTATTT
365	697	NCBI;cellular organisms;Eukaryota;Opisthokonta;Metazoa;Eumetazoa;Bilateria;Protostomia;Spiralia;Gnathifera <animals>;Rotifera;Eurotatoria;Monogononta;Pseudotrocha;Ploima;	0	0	164	0	0	0	0	0	0	0	0	0	0	0	0	0	0	0	0	0	0	0	0	0	0	0	0	0	0	0	0	0	ATTATCTGATTCTAAATATCATAGAGGGATCTCTGTTGATTTAGCTATTTTTAGATTACATATTGCTGGAATTTCTTCAATTTTAGGAAGAATTAATTTTTTAACTACAATTATTTGTTCTCGTACAACTAAAATAGTTTCATTAGAGCGTATGCCTTTATTGATTTGAGCTATAGCAATTACAGCTGTTCTTTTAGTAACTAGATTGCCAGTGCTAGCAGGAGCGATTACTATGCTCTTAACAGATCGTAACTTTAATACTTCTTTTTTTGATCCTGCAGGTGGTGGTAATCCAGTTTTATATCAGCATTTATTT
366	705	NCBI;cellular organisms;Eukaryota;Sar;Alveolata;Dinophyceae;Peridiniales;Heterocapsaceae;Heterocapsa;Heterocapsa circularisquama;	1	0	0	0	1	0	4	5	190	0	8	1	0	0	0	0	0	0	0	0	0	2	2	0	0	18	0	0	0	0	0	0	TCTATCCACTTCTTTTATGTCTCTTTCTCCTTCTTCTATCTACTTCCTTGTCGTTGGTCTTGCTGTCTCCGGTATTTCTTCTGCTCTAACTTCTCTAAACTTCCTACTAACTATTACTAACATGCGTGTTTACTCCATGTCTCTAAAGCTAATGCCTCTATTCAACTGGTCTATTCTTATCACTTCTAACCTACTACTAATGTGTCTACCAATTCTAACTGGTGCTCTTATCATGGTTCTTTCCGACCTTAATCTAAATACTCTATTCTATGATCCTGTCTTCGGTGGTGATCCAGTTCTATATCAGCATCTTTTC
367	707	NCBI;cellular organisms;Eukaryota;Opisthokonta;Metazoa;Eumetazoa;Bilateria;Protostomia;	0	0	0	0	0	0	0	0	0	0	0	0	0	0	0	1	253	0	0	0	0	0	0	0	0	0	0	0	0	0	0	0	GTTAAGAGGAAATTTAGCCCATGCTGGCGCATCTGTTGACTTTGCAATTTTTTCTCTTCACTTGGCAGGGGTTTCTTCTTTAATAGGAGCAGTCAATTTCATTAGAACACTTGGTAATCTTCGAACTATAGGAATGCTTATAGATCGAATGCCCTTATTTGCTTGATCAGTTTTAGTGACAGCAATTTTATTACTTCTATCCCTTCCTGTATTAGCAGGGGCTATTACTATGTTATTGACCGATCGTAATTTTAATACGTCTTTTTATGACCCCAGAGGAGGGGGAGACCCTTTACTGTATCAACACTTATTT
368	711	NCBI;cellular organisms;Eukaryota;Opisthokonta;Metazoa;Eumetazoa;Bilateria;Protostomia;Spiralia;Lophotrochozoa;Platyhelminthes;Cestoda;Eucestoda;	0	0	0	0	0	0	0	0	0	0	180	0	0	0	0	0	0	0	0	0	0	0	0	0	0	0	0	0	0	0	0	0	TTTATCTTCCTATCTTTTCAATAGAAGGAAGGGAGTTGAATTTCTAATGTTTTCATTACATTTGGCTGGCTTATCTAGTATTTTTGGGTCTTTAAACTTCATATGTACTCTTTATAGAGCTTTTACAAGTAGTACTTTGTCTCGTAGATCTATCATTCTTTGGGCTTATTTGTTTACTTCTATACTTTTATTAACTACTCTTCCTGTTTTAGCTGCTGCTATAACAATGCTTTTATTTGATCGAAAATTTGGTTCTGCTTTTTTTGATCCTTCAGGAGGGGGGGATCCAGTTCTATTCCAGCATATGTTT
369	713	NCBI;cellular organisms;Eukaryota;Opisthokonta;Metazoa;Eumetazoa;Bilateria;Protostomia;Spiralia;Lophotrochozoa;Annelida;Polychaeta;Sedentaria;Canalipalpata;Spionida;Spionidae;Polydora;Polydora onagawaensis;	0	0	0	0	0	0	254	0	1	0	5	0	0	0	0	0	15	0	0	0	0	0	0	0	0	0	0	0	0	0	0	0	TTTATCTGCCCGAGAGACTCCTATGGATGCAATGATCTTCTCCCTTCACTTAGCTGGCCTTTCTTCAATTTTTGGAGCTATCAACTTCATCACTACCATGTTCATGAACGGGCCTAAAGGTTTCATGTTTTATAACTACTACCTATATTTGTGGTGTATGATTGTAACTACTTTTATGCTTATTTCAACTCTTCCTGTTTTGGCTGCAGCTATCACTATGCTTTTATTTGATCGTCATTTTAACACTTCTTACTTTAATGTTACTGGTGGTGGAGACCCTATCTTATTTCAGCATTTATTC
370	714	BOLD;Haptophyta;Prymnesiophyceae;85.76	0	1	0	0	1	0	0	0	0	0	0	0	0	0	0	0	0	0	0	0	0	0	0	0	0	0	0	0	0	0	0	0	TTTGAGTAGTGCACAGGCTCACTCTGGACCTGCTGTAGATCTTGCTATTTTTAGTTTACACTTATCCGGAGCTTCTTCCATTTTAGGAGCTATTAATTTTATTACAACTATTTTTAATATGAGAGCTCCCGGGATGTCTATGCATAGACTTCCTTTAATGGTTTGGTCTGTTTTGATTACTGCTTTTTTATTATTATTATCTTTACCTGTTCTAGCAGGTGCTATCACAATGCTTTTAACAGATAGAAACTTTAATACTACTTTCTTTGATCCTGCTGGGGGAGGAGATCCTGTATTATATCAACATTTGTTT
371	715	BOLD;Heterokontophyta;77.33	84	1	0	34	0	1	7	1	2	0	6	0	0	0	0	0	103	0	3	0	0	0	1	0	0	0	1	2	0	0	0	0	ATTATCAAGTGTTCAGGCACACTCAGGAGGATCGGTAGATTTAGCAATCTTCAGTCTTCATTTATCAGGAGCTTCATCAATCCTTGGAGCAATTAATTTTATTACTACAATTTTTAATATGAGAGCTCCAGGAATGTCAATGCACCGTTTACCATTATTTGTATGGGCAGTATTGATTACCGCATTCTTATTATTACTTTCTTTACCTGTATTAGCAGGAGCAATTACCATGCTATTAACAGATAGAAATTTTAATACATCATTCTTCGATCCAGCAGGAGGTGGAGATCCTGTGTTGTATCAGCACTTATTC
372	717	NCBI;cellular organisms;Eukaryota;Opisthokonta;Metazoa;Eumetazoa;Bilateria;Protostomia;Ecdysozoa;Panarthropoda;Arthropoda;Mandibulata;Pancrustacea;Crustacea;Multicrustacea;Hexanauplia;Copepoda;Neocopepoda;Gymnoplea;Calanoida;Clausocalanidae;Clausocalanus;Clausocalanus jobei;	0	0	0	0	0	0	0	0	0	0	0	0	0	0	0	0	0	0	0	1	0	0	0	0	0	0	0	0	0	0	0	0	TTTATCTAGTAATGTAGCCCACGCGGGAGGATCAGTAGATTTTGCTATTTTTTCACTACATCTCGCAGGTGTTAGATCTATTTTAGGAGCAGTTAATTTTATTAGAACTTTAGGTAACTTACGAGTGTTTGGAATACTTTTAGATCGTATCCCACTATTTGCATGGTCTGTCTTAGTAACTGCAGTTCTTCTATTATTATCTTTACCAGTTTTAGCAGGGGCTATTACTATATTGTTAACAGATCGTAATTTAAATACATCTTTTTATGACGTGGGAGGGGGGGGAGACCCAATTCTTTACCAACATTTATTT
373	720	NCBI;cellular organisms;Eukaryota;Opisthokonta;Metazoa;Eumetazoa;Bilateria;Protostomia;Spiralia;Gnathifera <animals>;Rotifera;Eurotatoria;Monogononta;Pseudotrocha;Ploima;	29	0	0	0	3	0	0	0	0	0	0	0	0	0	0	0	0	0	0	0	0	0	0	1	0	0	0	0	0	0	0	0	CTATCTGATTCAAAATTTCATAGAGGAATTTCAGTTGATTTAGCAATTTTTAGATTACACATTGCTGGTATTTCGTCTATTTTAGGAAGAATTAATTTCTTAACTACTATTATTTGTTCTCGTACAACAAAAATAGTGTCTTTAGATCGTCTACCTTTAATGATTTGAGCTTTAGCTGTAACGGCTGTTCTTTTAGTTACGAGGTTACCTGTTTTAGCTGGTGCAATTACTATGCTTTTAACAGATCGTAATTTTAATACTTCTTTTTTTGATCCAGCTGGAGGAGGTAATCCAGTTTTATACCAACATTTATTT
374	722	NCBI;cellular organisms;Eukaryota;Opisthokonta;Metazoa;Eumetazoa;Bilateria;Protostomia;Ecdysozoa;Panarthropoda;Arthropoda;Mandibulata;Pancrustacea;	0	0	0	29	0	0	0	0	0	0	0	0	0	0	84	0	0	0	0	0	0	60	0	0	0	0	0	0	0	0	0	0	TCTCAGAAGTAACATCGCTCATGGAGGAGCGTCTGTTGACATGGCGATTTTTTCACTTCACTTGGCCGGTGTATCTTCTCTATTAGGGGCCGTAAATTTTATTAGTACTCTTAGAAATTTACGGGCTATAGGCATGCTAATAGATCGAATGCCCTTGTTTCCTTGGGCGGTTTTAGTTACAGCTGTGTTATTACTCTTATCTCTTCCAGTTTTAGCGGGAGCTATTACTATACTTTTAACTGATCGAAACTTTAATTCATCCTTTTACGACCCAAGAGGAGGGGGAGACCCTCTCCTTTACCAGCACTTGTTC
375	724	NCBI;cellular organisms;Eukaryota;Sar;Stramenopiles;Ochrophyta;PX clade;Phaeophyceae;Fucales;Sargassaceae;Sargassum;	6	0	10	1	1	0	0	2	0	0	0	0	5	1	0	36	107	0	26	0	0	4	0	0	0	0	0	0	0	0	0	30	TTATCTAACTCGGACTTTCACGGTGGTCCGGCCGTGGATTTAGCAATTCTTAGTCTCCATTTAGCAGGCGCTTCTTCAATATTGGGTGCCATTAATTTTATAACAACCATCATTAACATGCGCGCCCCGGGCATGACTTTTCATAAGATGCCCTTGTTTATTTGGGCTGCCTTGATTACCGCATTTCTCCTTTTACTGGCTATTCCAGTTTTAGCGGGTGCACTCACTATGCTGCTCACAGATCGCAACTTCGGAACTGCTTTTTTCGAGCCAGCTGGCGGTGGAGACCCCATTTTCTGGCAGCATCTTTTC
376	727	BOLD;Rhodophyta;77.33	0	7	0	0	0	0	0	3	0	0	6	0	31	0	0	0	1	0	0	0	0	63	0	0	0	0	0	0	0	0	0	2	TTTAGCTAGTATTCAATTTCACTCAGGAGGTGCGGTTGATTGTGCAATTTTTGCACTTCACGTTGCAGGAGCTTCTTCAATTTTAGGAGCTGTTAACTTTATTACGACAGTTATGAACATGCGAGCTCCTGGAATTAGTTTCCACCGAATGCCTCTTTTTGTTTGAAGTATCCTTGTTACGGTTGTTCTTCTTTTATTAGCGGTTCCTGTATTAGCAGGTGCGATTACTATGCTTCTAACAGATCGAAACTTTAACACAACTTTCTTCGATCCTGCTGGAGGAGGAGATCCTGTCCTTTATCAGCATCTTTTC
377	728	NCBI;cellular organisms;Eukaryota;Opisthokonta;Metazoa;Eumetazoa;Bilateria;Protostomia;	0	0	0	0	0	0	0	0	0	0	0	0	0	0	0	0	0	0	0	0	0	0	145	3	0	0	16	0	0	0	0	0	ACTCTCGAGTTCCTCGGGCCATCCGGGGCCTGCTGTTGATTTAGTGATCTTCAGCTTGCATCTAGCTGGTGCATCCTCAATCCTTAGCTCAATTAATTTTATCACGACGATTCTCAATATGAGGGCGCCAGGTTTGACCCTCCATAAGATGCCGCTTTTTGTCTGGTCTATTTTGGTTACGACATTTTTATTACTCTTGTCTTTGCCGGTTTTGGCTGGTGCTATTACTATGCTTTTGACAGATAGGAATTTTGGAACCGCTTTTTTTGAGGCTTCAATGGGCGGCGATCCCCTTCTGTTCCAGCATTTATTC
378	730	NCBI;cellular organisms;Eukaryota;Opisthokonta;Metazoa;Eumetazoa;	0	12	14	24	0	0	2	0	0	0	32	0	0	2	0	0	1	0	23	0	0	70	0	0	0	0	0	0	0	0	0	0	ATTAGCGTCAATTGATTTCCATTCAGGTGGATCTATTGATTTGGCTATTTTTAGTCTACATTTAGCAGGTATTTCATCAATTTTAGGAGCAATGAATTTCATTACTACTATTATTAACATGAGAACACCAGGAATGACGTTCCACAGATTACCTTTATTTGTTTGAGCGGTATTTATTACAGCAATATTATTATTACTATCATTACCAGTATTAGCAGGAGCTATTACAATGTTATTAACAGATAGAAATTTTAATACATCATTCTTCGACCCTGCAGGAGGAGGAGATCCAATTTTATATCAGCATCTTTTC
379	733	NCBI;cellular organisms;Eukaryota;Opisthokonta;Metazoa;Eumetazoa;Bilateria;Protostomia;	0	0	0	0	0	0	0	0	0	0	0	0	0	0	0	0	0	0	0	0	0	0	285	0	0	0	0	1	0	0	0	0	CTTAAGGGGAAATTTAGCTCATAGTGGCCCTTCGGTTGATTCAGGAATTTTTAGGCTACATTTAGCGGGGGTTTCCTCATTAATAGGAGCGATTAATTTTATTTCAACAATTTTGAATTTGCGAGGCCCTGGAATTACTTTAAAGCGGATAGTATTATACCCATGGTCAGCACTTGTAACTGGGGTGTTACTTTTAGGGTCTCTCCCTGTTTTAGCAGGGGGTATTACCATACTATTATCTGACCGCAGTGTTAATACTAGATTTTTTGATCCTATGGGGGGAGGGGACCCAATCTTATACCAACACTTATTC
380	734	NCBI;cellular organisms;Eukaryota;Opisthokonta;Metazoa;Eumetazoa;Bilateria;Protostomia;	0	0	6	0	45	0	0	99	0	0	68	1	1	0	0	0	1	0	0	1	0	74	0	0	0	4	0	0	0	0	0	0	TCTTTCATCATCCGCAGGCACACCTGGCATGTCTATGGATCTAGCCATTTTTTCACTTCATTTAGCTGGTGTATCATCAATTTTGGGAGCTGCTAATTTTATAACAACTATCTTTAACATGAGAACGCCAGGAATGACTTTACACAAAATGCCTCTATTTGCTTGGGCAATGCTTATAACAGCCTTTTTATTATTGCTTGCAGTTCCGGTATTGGCAGGAGCCATAACTATGCTTCTCACAGATAGAAATTTTGGGACAACCTTTTTTATACCAGAAGGAGGAGGCGACCCAATTTTGTTTCTTCACCTATTT
381	737	NCBI;cellular organisms;Eukaryota;Opisthokonta;Metazoa;Eumetazoa;Bilateria;Protostomia;Ecdysozoa;Panarthropoda;Arthropoda;Mandibulata;Pancrustacea;	0	0	0	0	0	0	0	1	0	0	0	0	0	0	267	0	0	0	0	0	0	0	0	0	0	0	0	0	0	0	0	0	TCTTAGATCTAACGTAGCTCACTCTGGCCCATCAGTTGACTTTGCTATCTTTGCTCTCCATTTGGCAGGAGTGTCTTCTCTTTTAGGTGCTGTCAATTTTATTAGTACATTCTCTAATTTGCGTACATTAGGAATATTGCTTGAGCGCGTTCCTCTTTTCGGGTGAGCTGTTTTAATTACCACAATTCTACTTCTTCTTTCTCTGCCCGTATTGGCTGGTGCGATTACTATATTATTAACAGACCGAAATTTAAACACATCTTTCTATGATTCTAATGGTGGTGGTGACCCGATTTTATACCAACATTTATTT
382	739	BOLD;Arthropoda;Copepoda;Calanoida;90.29	0	35	2	0	0	0	0	0	0	0	0	0	5	0	0	1	5	0	3	0	0	24	1	1	0	0	0	0	0	0	0	0	TTTATCTTCTAAAACAGGTCAACCAGGACCAGCAATGGATTTAGCAATTTTAAGTTTACATGTAGCTGGAGCTTCTTCTATTTTAGGAGCAATAAATTTCATTACTACTATTTTAAACATGAGAACACCGGGTATGACGTTACATAAAATGCCACTATTTTCATGGTCGATATTAGTGACAGCCTTTCTACTTTTATTATCTTTACCAGTTTTAGCAGGAGCAATTACAATGCTTCTTACTGATAGAAATTTTGGAACTGCATTTTTTGAAGCTCAAACAGGAGGTGATCCAGTTCTATTTCAACACTTGTTT
383	741	NCBI;cellular organisms;Eukaryota;Sar;Stramenopiles;Ochrophyta;Bacillariophyta;Coscinodiscophyceae;Rhizosoleniophycidae;Rhizosoleniales;Rhizosoleniaceae;	0	2	3	0	0	0	0	0	0	1	0	0	0	0	0	0	36	0	0	0	0	21	0	0	0	0	0	0	0	0	0	0	ATTATCTAGTGGTAATTCTCACTCAGGAGCTTCTGTGGATTTAGCTATATTTAGTTTACATTTATCAGGAGCTGCTTCTATTTTAGGAGCTATAAATTTTATTTGTACTATAGTAAATATGAGAGTAAAAGGTCTTTTTATGCATAGATTACCTTTATTTGTATGGGCTATATTAATTACTGCTGTTTTATTATTATTATCTTTACCTGTATTAGCAGGTGCTATTACCATGTTATTAACTGATAGAAATTTCAATACTACTTTTTTTGATCCTGCAGGTGGTGGAGATCCCGTGTTATATCAACATTTATTT
384	742	NCBI;cellular organisms;Eukaryota;Opisthokonta;Metazoa;	0	0	1	0	0	0	0	0	0	0	0	0	1	0	0	28	2	0	1	0	1	2	40	8	0	0	7	3	2	0	0	455	ACTTTCTTCTACAATTGGTTCACCTGGACCTGCTGTTGATCTTGCAATTTTTTCTCTTCACTTGGCTGGAGCTTCTTCAATAATGGGAGCAATTAATTTCATTACTACAATTTTTAATATGAGAGCCCCAGGAATGACTCTTCATAAAATGCCATTATTTGTTTGGTCTATTCTAATAACGGCAGTGCTTCTTTTACTTTCGCTTCCTGTTTTAGCTGGAGCAATTACGATGCTTCTTACGGATAGGAATTTTGGAACTGCCTTCTTCAGTGCAGCTGAAGGAGGAGACCCAATATTATTTCAGCATTTGTTT
385	744	BOLD;Ochrophyta;75.21	0	0	0	0	0	0	0	0	0	0	0	0	0	0	0	0	0	0	0	0	0	0	0	0	0	0	0	0	213	0	0	0	GCTATCTAGTGCCGCGGGCCATCCGGGCCCCGCAGTTGATTTGGTAATATTCAGTCTTCACCTGGCGGGTGCCTCGTCAATTTTGAGTTCGATCAACTTCATTACGACTATATTGAACATGCGGGCGCCTGGGTTGACCATGCACCGAATGCCGCTGTTTGTGTGGTCTATTTTGGTGACAACGTTCTTGTTGTTGTTGTCCCTTCCGGTATTGGCCGGGGCCATCACGATGCTGCTGACGGATCGTAATTTTGGCACCGCCTTTTTTGAAGCATCCATGGGCGGTGATCCGCTTCTTTTCCAACACCTTTTC
386	746	NCBI;cellular organisms;Eukaryota;Opisthokonta;Metazoa;Eumetazoa;Bilateria;Protostomia;Ecdysozoa;Nematoda;Enoplea;Dorylaimia;Dorylaimida;Dorylaimina;Longidoroidea;Longidoridae;Xiphinema;	1	17	0	2	0	1	0	71	2	0	3	0	0	0	0	0	0	99	0	0	0	0	1	0	0	0	0	0	0	0	0	0	TTTAAGTTCTATACAAGCGCACTCTGGTGGCTCTGTTGATTTAGCAATTTTTAGTTTACACGTTTCAGGTGTTTCTTCACTTTTAGGTGCGATAAACTTTATTTGTACTGTTTTTAATATGCGAGTTCCAGGGCTTTATATGCATCGATTGCCTCTTTTTGTTTGAGCAGTTTTAATAACGGCGTTTTTATTATTATTATCGTTACCTGTTTTAGCCGGAGGTATAACTATGCTGTTAACTGATCGTAATTTTAATACTACATTTTTTGATTCAGCCGGTGGTGGTGATCCGATTTTATATCAGCATCTATTC
387	747	NCBI;cellular organisms;Eukaryota;Rhodophyta;Florideophyceae;Rhodymeniophycidae;	0	0	0	0	0	0	0	0	1	0	0	0	0	184	0	0	0	0	0	0	0	0	0	0	0	0	0	0	0	0	0	0	ATTAAGTTCAATACAGAGTCATTCAGGAGCAGCTGTGGATTTGGCAATTTTTAGTTTGCATCTATCAGGTGCATCGTCAATTCTAGGTGCTATTAATTTTATATCTACAATTTTGAATATGCGAAATCCTGGCCAAACTTTTTATAGAATTCCATTGTTTGTTTGATCAATTTTTGTAACCGCTTTTTTACTATTATTAGCAGTTCCTGTACTTGCTGGTGCAATTACAATGTTATTAACAGATCGTAATTTTAATACTACATTTTTCGATCCTTCTGGGGGAGGTGATCCTATTTTGTATCAACATCTATTT
388	752	NCBI;cellular organisms;Eukaryota;Sar;Stramenopiles;Ochrophyta;Bacillariophyta;Mediophyceae;	0	1	13	0	0	0	0	0	0	0	0	0	0	0	0	0	10	0	16	0	0	0	0	0	0	0	0	0	0	0	0	0	GTTATCAAGTGGAACTGCTCATTCAGGTGGTGCTGTTGATTTAGCAATTTTCAGTTTACACTTATCAGGAGCATCTTCTATTTTAGGAGCAATTAATTTTATTTGTACAATTTTTAACATGCGAGTTAAAAGTTTGTCTTTTCATAAATTACCGTTATTTGTTTGGTCTGTTTTAATTACAGCATTTTTATTATTACTTTCTTTACCTGTATTAGCAGGTGCTATTACTATGTTGTTAACAGATAGAAATTTTAATACAACATTTTTTGATCCAGCTGGGGGTGGAGATCCTGTTTTATATCAACATTTATTT
389	755	NCBI;cellular organisms;Eukaryota;Sar;Stramenopiles;Oomycota;	0	0	320	0	0	0	0	0	0	0	0	0	0	0	0	0	0	0	24	0	0	0	0	0	0	0	0	0	0	0	0	0	TTTATCAAGTGCTCAAGCACATTCCGGTCCATCAGTTGATTTAGCAATTTTTAGTTTACATTTAGCTGGTATATCATCAATTTTAGGTGCAATTAATTTTATAACTACTATATGTAATATGAGATCACCAGGTTTATCTTTTCATAGATTACCTTTATTTGTGTGGGCTATATTTATAACAGCTATATTATTATTACTTTCATTACCAGTTTTAGCAGGTGCTATTACAATGCTTTTAACTGATAGAAACTTAAATACTGCTTTTTTTGATCCTTCAGGAGGTGGAGATCCGGTATTATATCAACATTTATTT
390	756	NCBI;cellular organisms;Eukaryota;Opisthokonta;Metazoa;Eumetazoa;Bilateria;Protostomia;Spiralia;Gnathifera <animals>;Chaetognatha;environmental samples <arrow worms,phylum Chaetognatha>;Chaetognatha environmental sample;	5	19	9	0	0	0	0	1	0	0	0	0	2	0	0	1	8	1	26	0	0	14	2	0	0	0	1	0	0	0	0	0	TTTGTCCTCTAAGACAGGTCAACCAGGTCCAGCAATGGACTTAGCAATTTTAAGTTTGCACGTAGCTGGAGCCTCTTCCATTTTAGGAGCAATAAATTTCATTACTACTATTTTAAACATGAGAACACCGGGTATGACTTTACATAAAATGCCATTATTCTCATGGTCTATATTAGTAACGGCTTTTTTACTTTTATTATCTCTACCAGTTTTAGCAGGAGCAATCACAATGCTTCTAACCGATAGAAATTTTGGAACTGCTTTCTTTGAAGCTCAAACAGGAGGTGATCCAGTTCTATTTCAACACTTGTTT
391	757	NCBI;cellular organisms;Eukaryota;Sar;Stramenopiles;Ochrophyta;Bacillariophyta;	0	5	2	0	0	0	0	0	0	1	0	0	0	0	0	0	2	0	0	0	0	0	0	0	0	0	0	0	0	0	0	0	TTTATCGAGTGGTACTTCACATTCAGGAGGTGCTGTCGACTTAGCAATTTTTAGTTTACACTTATCAGGAGCTTCGTCAATCTTAGGGGCTATTAATTTCATATGTACTATTTTTAATATGCGTGTTAAAAGTTTGTCTTTTCATAAACTGCCTTTATTTGTTTGGGCTGTTTTAATAACAGCATTTTTATTGTTACTATCTTTACCTGTATTAGCAGGGGCAATTACAATGCTGTTAACTGATAGAAATTTTAACACAACATTTTTTGATCCTGCAGGTGGGGGTGATCCTGTTTTATATCAGCATTTATTT
392	758	BOLD;Haptophyta;83.33	0	0	0	1	14	0	7	0	3	3	0	11	0	2	119	0	0	0	0	0	1	0	0	2	0	6	2	0	0	0	0	0	TTTAAGTAGTGTTCAAGCACATTCGGGTCCGTCGGTAGATTTAGCTATCTTTAGTTTACATTTATCAGGGGCTTCATCAATTCTTGGAGCAATAAACTTCATTACAACAATTTTTAATATGAGAGCTCCGGGAATGTCAATGCATCGACTTCCATTATTTGTATGAGCTGTTTTAATTACAGCTTTTTTATTACTTCTATCTTTACCGGTATTAGCTGGGGCAATTACGATGCTCCTAACAGATAGGAATTTTAATACAACATTTTTTGATCCAGCTGGTGGAGGTGATCCAGTATTATATCAACATCTTTTT
393	759	BOLD;Cnidaria;79.67	0	0	2	0	0	0	0	0	0	0	2	0	0	0	0	13	17	0	1	0	0	62	1	0	0	0	0	0	0	0	0	6	TCTTTCAAGTAATTTAGGACATTCAGGCCCGGCCGTTGATATGGCTATATTAAGCTTACATTTGGCAGGAGCTTCATCTATCTTAGGTGCAATAAACTTTATAACAACTATTTTTAATATGAGAACTCCTGAGATGACATTACATAGAATGCCTTTATTTGTTTGGTCTATTTTAGTTACAGTTTTTCTATTAGTATTATCTTTACCTGTATTAGCGGGAGCAATAACAATGCTTTTAACAGACCGCAATTTTGGTACAGCATTTTTTGCTCCAGAGGGCGGTGGTGATCCCATTTTATTTCAGCATTTGTTT
394	763	NCBI;cellular organisms;Eukaryota;Opisthokonta;Metazoa;Eumetazoa;Bilateria;Protostomia;Spiralia;Lophotrochozoa;Mollusca;Gastropoda;	0	0	0	0	0	0	178	0	0	0	0	0	0	0	0	0	0	0	0	0	0	0	0	0	0	0	0	0	0	0	0	0	TCTATCGGGAAACCTTGCTCATGCAGGAGGTTCAGTAGACCTTGCAATTTTTTCGCTTCACCTGGCCGGTGTTTCTTCTATTTTAGGGGCTGTTAACTTTATTACCACAATTATTAACATGCGGTGACGAGGAATACAGTTTGAACGACTACCTCTTTTTGTTTGATCAGTAAAAATTACAGCAGTTCTTCTTCTACTATCTTTACCAGTTTTAGCTGGAGCTATTACAATGCTTTTAACGGATCGAAATTTTAATACAGCGTTCTTCGACCCTGCTGGTGGTGGAGATCCTATTCTGTATCAACACCTATTT
395	765	NCBI;cellular organisms;Eukaryota;Rhodophyta;Florideophyceae;Rhodymeniophycidae;Gigartinales;Kallymeniaceae;	5	0	23	0	0	0	0	0	0	0	0	0	0	0	0	3	42	0	3	7	0	0	33	2	0	0	32	0	0	1	0	0	ATTATCTAATAAGCTTGGTCATGCAGGACCATCAGTTGATATGGCAATTTTTGCACTCCATTTAGCTGGGGCTTCATCAATTCTAGGGGCGGTAAATTTCATTACAACTATATTAAATATGAGAACCCCAGGGATGACTATTCATAAGATGCCTCTTTTTGTATGGGCAATGCTCATTACAGCTTTTTTATTATTATTAGCTGTTCCTGTTCTTGCAGGGGCTATTACTATGCTTCTAACTGATAGAAATTTTGGAACAACGTTTTTTAACCCTGCAGGTGGAGGAGATCCAGTTCTATTTCAACACTTATTT
396	766	NCBI;cellular organisms;Eukaryota;Opisthokonta;Metazoa;Eumetazoa;Bilateria;Protostomia;Ecdysozoa;Panarthropoda;Arthropoda;Mandibulata;Pancrustacea;Crustacea;Multicrustacea;Hexanauplia;Copepoda;Neocopepoda;Gymnoplea;Calanoida;Euchaetidae;Euchaeta;Euchaeta marina;	0	0	0	0	1	0	0	0	0	0	0	0	0	0	0	0	0	0	0	0	0	0	0	393	0	0	0	0	0	0	0	0	CCTGGCTAGAAATATTGCTCATGCAGGAGGATCAGTAGACTTTGCAATTTTTTCTTTACACCTGGCAGGGGTTTCTTCTATTTTAGGAGCTATTAATTTTATTAGTACTCTCGCTAATTTGCGGGTGTTTGGCATGTTATTGGAGCAAATACCACTATTTGCCTGGGCCGTTCTAGTAACAGTTATTCTTCTCTTATTGTCTTTGCCAGTATTAGCGGGAGCAATTACAATACTTTTAACAGATCGAAACCTTAACACCACTTTTTATGATGCAGGAGGAGGAGGAGATCCTATTCTATACCAACACCTTTTT
397	769	NCBI;cellular organisms;Eukaryota;Opisthokonta;Metazoa;Eumetazoa;	5	13	103	0	0	0	0	2	0	0	21	0	17	0	0	33	40	0	2	0	0	24	14	0	0	0	0	0	1	0	0	29	TTTGAGTTCGATTACTGGCCATAGCTCTCCTGCAGTAGATATGGCTATTTTTTCACTTCACTTAGCTGGAGCCTCTTCAATACTAGGTGCTGTAAACTTCATTACCACTATTCTTAATATGAGAGCTCCTGGAATGACACTTCATAAAATGCCTTTATTTGCATGGGCTATGTTAGTCACTGCTTTTCTACTTCTTTTAGCTGTTCCTGTTTTGGGTGGAGCTATCACCATGCTACTTACTGACCGTAACTTTGGGACTACATTTTTTGATCCAGCTGGTGGAGGTGACCCTGTTCTTTTCCAACACCTTTTC
398	774	BOLD;Rhodophyta;77.53	0	31	3	3	7	1	1	69	0	0	60	0	4	0	0	1	0	0	5	0	0	75	0	0	0	1	0	0	0	0	0	0	GTTATCTACAAGTGCACAGCCTGGACCAGCAATGGATTTAGCAATATTAAGTTTACATGTTGCTGGAGCTTCTTCAATTTTAGGTGCTATTAATTTTATAACAACAATTTTCAATATGAGAGCACCTGGAATGACACTTCATAAGATGCCATTATTTGTTTGGTCGATGTTAGTTACAGCATTCTTATTACTTTTAGCTGTTCCAGTTTTAGCTGGTGGAATTACTATGTTACTTACTGATAGAAATTTTGGAACTGCATTTTTTAATCCAGAGGGTGGAGGCGATCCGATATTATTCCAACATTTATTT
399	777	NCBI;cellular organisms;Eukaryota;Sar;Stramenopiles;Ochrophyta;Eustigmatophyceae;Eustigmatales;Monodopsidaceae;Nannochloropsis;	12	0	43	5	5	0	2	0	0	0	0	0	3	0	0	0	61	0	0	0	3	6	0	0	0	0	0	0	0	0	0	0	ATTATCTAGTGTTCAGGCACACTCTGGACCTTCTGTAGACTTAGCAATCTTTAGTCTTCACTTAGCAGGTGCTTCATCAATTATGGGTGCGGTAAACTTTATCACCACTATCCTAAATATGCGAGCTCCTGGTATCACTATGCACCGATTACCTCTATTCGTATGGGCGATTTTCATTACTGTTATTCTGCTACTACTTTCTCTGCCTGTTCTTGCAGCAGCGATTACTATGTTACTAACAGATCGTAATTTCAACACTACCTTCTTCGATCCAGCTGGAGGAGGAGACCCTGTACTATACCAGCACCTATTC
400	778	BOLD;Rhodophyta;76.62	0	0	0	0	0	0	0	0	0	0	0	0	0	0	0	0	0	0	0	0	0	0	10	0	0	0	0	0	219	0	0	6	GTTAAGCTCGAAAATAGGACACCCCGGACACTCGGTAGATTTTTTAATTTTAGGAGTTCATATTTTAGGTGCCTCATCAATTTTAGGAGCAATTAATTTTATTACCACGATTTTTAATATGAGAGCCCCTGGGATGACATTACATAAAATGCCTTTATTTGTTTGGGCTATTTTAATTACAGTTTTTTTATTGCTTTTATCACTTCCTGTGCTTGCTGGAGGGGTTACCATGCTTTTAACAGATAGAAATTTTGGAACAAGCTTTTTTGATGCAGCAGGAGGAGGAGATCCACTTTTATTTCAACATCTTTTC
401	779	NCBI;cellular organisms;Eukaryota;Sar;Alveolata;Dinophyceae;	0	0	0	0	144	0	0	0	1	0	0	1	0	0	40	0	0	0	0	0	2	0	0	0	0	15	0	0	0	0	0	0	ATTAAGCACTTCTTTCATGAGTTTATCACCTTCAAGTACTGGAAATCTTATCTTTGGATTATTAATCTCAGGTATATCCTCATGTCTCACATCTCTTAATTTCATTCCACTTTTGGACAACAATTCTAAATCTGAGATCTTATTATCTGACATTAAAGACTATGCCATTATTCCCTTGGGCTCTCTTTATTACAGGAGGAATGCTTTTATTAACATTACCAATCTTATCAGGAGCTTTTCTAATGGTCTTGGCTGATCTTCATTCTAATACACTTTTCTTTGATCCAATCTTTGGAGGAGATCCTATTTTCTATCAACACTTATTT
402	780	NCBI;cellular organisms;Eukaryota;Viridiplantae;Chlorophyta;Chloropicophyceae;Chloropicales;Chloropicaceae;Chloroparvula;Chloroparvula pacifica;	0	1	2	1	6	0	0	0	0	0	0	0	0	0	0	28	18	0	5	0	15	0	0	5	0	0	0	0	12	0	0	0	ATTGTCAGATCTAACATCTCACTCTGGTGGTTCTGTGGACCTTGCTATTTTCAGTCTTCATGTATCTGGTGCAAGTAGTATTCTTGGTGCAGTTAACTTTATCACTACTGTACTTAATATGAGAGGCCCAGGTATGACAATGCATAGATTGCCTCTGTTCGCATGGGCTGTTCTATTGACCGCAATCCTATTGCTACTAGCTCTACCTGTTCTAGCTGGTGCAATTACTATGCTACTAACTGACCGAAACTTCAATACTAGTTTCTTCGATCCAGCTGGTGGAGGTGATCCAATTCTATTCCAACACTTGTTC
403	782	BOLD;Arthropoda;Copepoda;87.7	0	2	20	9	25	0	0	43	0	0	65	0	0	0	0	1	4	0	5	0	0	7	6	6	0	0	0	0	12	0	0	4	ATTATCATCTAAAACTGGTCAGCCAGGTCCAGCGATGGATTTAGCAATTTTAAGTTTGCATGTTGCAGGAGCTTCTTCAATTTTAGGAGCAATTAACTTTATCACTACAATTTTAAATATGAGAACACCCGGTATGACTTTACACAAAATGCCATTATTCTCATGGTCAATTCTGGTAACAGCATTCTTACTTTTATTATCATTACCAGTTTTAGCAGGAGCTATAACAATGCTTTTAACAGATAGAAACTTTGGAACCGCTTTCTTTGAAGCACAAACAGGAGGAGATCCAGTTTTGTTCCAACACTTATTT
404	789	NCBI;cellular organisms;Eukaryota;Amoebozoa;Discosea;Flabellinia;Dactylopodida;Vexilliferidae;Vexillifera;Vexillifera bacillipedes;	0	0	0	0	0	1	0	179	0	0	0	1	1	0	0	1	0	85	0	0	0	0	1	0	0	0	0	0	0	0	0	0	ATTATCTGGTATTATTGCGCATTCTGGTGGTTCTGTAGATTTAGCTATTTTTAGTTTACATTTAGCAGGAGTTTCTTCATTATTAGGTGCTATTAATTTTATAACAACAGTATTTAATATGCGTGCAAGTACGATGACTTTATATGAAATACCCTTATTTGTTTGGGCTGTATTAATAACAGCTTTTTTATTATTATTATCATTACCTGTGTTAGCTGGTGCAATTACAATGCTTTTAACAGATCGTAATTTTAATACGACTTTTTTTGATCCTGCTGGCGGTGGTGATCCTATTTTATATAATCATTTATTT
405	791	NCBI;cellular organisms;Eukaryota;Sar;Alveolata;Dinophyceae;	3	0	35	0	0	0	41	0	0	4	113	0	0	0	0	0	0	0	0	0	0	0	0	0	0	0	0	0	0	0	0	0	TTTAAGCACTTCTTTTATGAGTTTATCACCATCAAGTACATGTAATATTATATTTGGATTATTAATCTCTGGTATAAGTTCTTGCCTTACATCTCTTAACTTTCTTATTACAATTCTTAACCTGAGATCATATTATCTTACATTAAAGACTATCCCATTATTTTCTTGGTCTCTTATAATTACTGCTGCAATGCTACTATTAACATTACCAATATTAACTGGATCTCTTATAATGGTTCTAGCTGATCTTCATTCTAATACACTTTTCTTTGATCCAATCTTTGGAGGAGATCCTATATTATATCAACATTTATTT
406	793	NCBI;cellular organisms;Eukaryota;Sar;Stramenopiles;Oomycota;	17	0	10	0	0	0	77	36	78	0	10	1	0	0	3	0	31	0	29	0	1	0	43	16	0	2	171	2	0	0	0	0	ACTAGCAGGAGTTTTTGCTCATTCTGGAGCATCAGTTGATTTAGCTATTTTTAGTTTACACTTAGCTGGGATTTCTTCAATCGCGGGTGCCATTAATTTTATTGTAACTATTAATAATATGAGATGTCGTGGTATGATGTTTAGTCGTTTACCATTATTTGTATGAACTGTTTTTATTACTGCTGTATTATTATTATTATCGTTGCCTGTTTTAGCTGGTGCTATTACTATGTTACTAACTGATAGAAACTTAAATACTACTTTCTTTGATGCAGCAGGTGGTGGTGATCCAGTATTATATCAACATTTATTT
407	795	NCBI;cellular organisms;Eukaryota;Opisthokonta;Metazoa;Porifera;Demospongiae;Heteroscleromorpha;Axinellida;Raspailiidae;Sollasella;	3	8	19	2	0	0	0	2	0	0	1	0	7	0	0	4	21	0	28	0	0	3	5	9	0	0	0	0	0	0	0	1	ACTTTCAAACAAACTTGGACATCCTGGACCGTCAGTTGATATGGCTATATTTGCACTACACTTAGCAGGAGCTTCATCAATACTTGGAGCAGTTAACTTTATTACAACTATTTTAAATATGAGAACACCCGGCATGACACTTCACAAAATGCCATTGTTTGTTTGGGCAATGTTAATTACGGCTTTTTTATTATTACTCGCAGTGCCTGTATTAGCTGGAGCAATAACAATGTTACTCACTGATAGAAACTTTGGAACGACTTTCTTCAATCCTGCTGGCGGAGGTGACCCAGTATTGTTTCAACACCTATTT
408	797	BOLD;Bacillariophyta;83.17	0	3	21	36	0	0	30	0	0	0	16	0	0	0	5	0	15	0	0	0	0	0	0	0	0	3	0	0	0	0	0	0	GCTATCGAGTATTAGTTCGCATTCAGGCGCTCCAGTAGATTTAGCTATATTTAGTTTGCATCTATCAGGTGCTGCTTCTATTTTAGGCGCGATTAATTTTATTTGTACGATTTTTAATATGCGAGTAAAAGGCTTATTTATGCATCGTTTACCTTTATTTGTTTGGGCTATTCTAATAACAGCATTTTTATTATTATTATCACTTCCAGTATTAGCAGGAGCTATTACAATGTTATTAACTGATAGAAATTTTAATACAACATTTTTTGACCCAGCTGGAGGTGGTGATCCTGTATTGTTTCAACATCTTTTT
409	801	NCBI;cellular organisms;Eukaryota;Opisthokonta;Metazoa;Eumetazoa;Bilateria;	1	1	0	0	0	0	0	0	0	0	0	0	1	0	0	0	0	0	0	0	0	0	0	0	0	0	0	0	0	0	0	0	CCTATCAACCCTAGGGCACCCTGGGGCCGCGGTTGACCTCGGAATTTTCTCTCTCCATCTCGCCGGAGTAAGAAGAATCTTAGGGTCTGCAAATTTTATTACGACTATCTCTAACATGCGGCCAGACGCCATGACCATGGAGCTAATGCCCCTCTTCGTATGGTCAGTCCTGTTAACAGCCATTCTTCTTCTCCTATCTCTACCCGTTCTTGCTGGGGCTATTACAATACTTTTAACGGATCGAAATTTTAATACGTCTTTTTTCGACCCGGCAGGGGGTGGGGACCCAATCCTTTACCAACATCTTTTC
410	802	NCBI;cellular organisms;Eukaryota;Sar;Stramenopiles;Oomycota;	0	0	2	0	0	0	0	0	0	0	0	0	0	0	0	0	43	0	21	1	0	0	51	7	0	0	37	0	0	0	0	0	ATTAGCAAGTGTTCAAGCACATTCAGGTCCTTCTGTAGATTTAGCTATCTTCAGCTTACACTTAGCTGGTGCATCTTCTATTATGGGTGCTATCAATTTTATTACTACTATCTTAAATATGCGGGCTCCAGGTTTAAGTATGCATAAAATGCCATTATTTGTATGGTCAGTATTTATTACTGTAATTTTACTGTTACTATCATTACCTGTATTAGCAGGTGCAATTACTATGCTTTTAACTGATCGTAATTTTAATACTACTTTCTTCGACCCTGCTGGTGGAGGAGATCCTGTATTATACCAACACTTATTC
411	803	NCBI;cellular organisms;Eukaryota;Sar;Stramenopiles;Ochrophyta;Bacillariophyta;Coscinodiscophyceae;Rhizosoleniophycidae;Rhizosoleniales;Rhizosoleniaceae;Guinardia;Guinardia delicatula;	0	0	7	0	0	0	0	0	0	0	0	0	0	0	0	0	23	0	128	0	0	0	0	0	0	0	0	0	0	0	0	0	ATTATCAAGTGGTAATTCTCATTCAGGAGCTTCTGTAGATTTAGCTATTTTTAGTTTACATTTATCAGGAGCTGCATCTATTTTGGGTGCTATTAATTTTATTTGTACTATTTTAAATATGCGGGTAAAAGGATTATTTATGCATAGATTACCTCTATTCGTATGGTCTATTTTAATTACAGCTGTATTACTATTATTATCTTTACCTGTATTAGCTGGTGCAATTACTATGCTATTAACTGATAGAAATTTTAATACAACTTTTTTTGATCCTGCTGGAGGAGGAGATCCTGTACTATACCAACATTTATTT
412	807	NCBI;cellular organisms;Eukaryota;Sar;Stramenopiles;Ochrophyta;	1	2	6	1	0	0	0	0	0	0	0	0	7	0	0	3	19	0	0	0	0	90	0	0	0	0	0	0	0	0	0	0	ACTCTCAAATAAACTTGGACACGCAGGACCTTCTGTTGATATGGCAATTTTTGCTCTTCATTTAGCAGGTGCTTCCTCAATTTTAGGTGCGGTTAATTTTATAACAACAATACTTAATATGAGAACGCCTGGAATGACTCTTCATAAGATGCCACTTTTTGTATGGGCTATGCTAATTACAGCTTTCTTACTTTTGTTAGCGGTTCCTGTTTTAGCTGGAGCAATTACAATGCTTCTAACTGATAGAAACTTTGGTACAACATTCTTCAATCCTGCAGGTGGAGGAGACCCTGTACTTTTCCAACACTTATTT
413	809	NCBI;cellular organisms;Eukaryota;Rhodophyta;Florideophyceae;Rhodymeniophycidae;Ceramiales;Rhodomelaceae;Polysiphonioideae;Polysiphonia;Polysiphonia homoia;	0	0	25	0	0	8	0	0	0	0	0	0	0	0	0	6	22	0	20	0	0	1	26	1	0	0	4	0	17	0	0	3	ATTATCTAACAAGCTTGGTCATGCAGGACCTTCAGTTGATATGGCAATTTTTGCCCTCCATTTAGCTGGAGCTTCTTCAATATTAGGAGCGGTAAATTTCATTACAACTATTTTAAATATGAGAACGCCAGGAATGACTATTCATAAGATGCCTCTTTTTGTATGGGCAATGCTCATTACAGCTTTCTTACTATTATTAGCCGTTCCTGTTCTTGCAGGTGCTATTACCATGCTTCTAACTGACAGAAATTTTGGGACAACATTTTTTAATCCTGCAGGTGGAGGAGATCCAGTTTTATTCCAACACTTATTC
414	812	NCBI;cellular organisms;Eukaryota;Opisthokonta;Metazoa;Eumetazoa;Bilateria;	0	0	0	0	0	0	30	0	0	0	182	0	0	0	0	0	0	0	0	0	0	0	0	0	0	0	0	0	0	0	0	0	TCTAAGTAGAAATCTTGCACACGCAGGCCCATCTGTTGATCTTGCTATTTTCTCACTACATCTAGCAGGAGTTTCCTCTATTCTAGGGGCCCTCAACTTCCTAGCGACAATTTATAACATACGATGAGAAGGCATGGAATCTGAACGGATCCCGCTATTTGCATGAGCAGTAGCTGTCACCGCCGCACTTCTGGTCCTGTCCCTTCCAGTTCTTGCCGGGGCCATTACAATGCTCCTTACAGACCGAAACCTTAATACTACTTTTTTTGACCCTTCCGGAGGTGGAGACCCTATTCTTTACCAACACCTGTTC
415	813	NCBI;cellular organisms;Eukaryota;Opisthokonta;Metazoa;Eumetazoa;Cnidaria;Anthozoa;Hexacorallia;Scleractinia;Fungiina;Siderastreidae;Siderastrea;	2	12	9	0	0	0	0	1	0	0	7	0	0	0	0	13	4	0	16	0	0	107	0	0	0	0	0	0	0	0	0	20	TCTTTCAAGCTCTGCAGGTTCTCCAGGTATGGGTATGGACCTTGCAATATTTTCGCTACATTTAGCGGGTGCATCTTCTATATTGGGTGCAGCTAATTTTATAACAACGATATTTAACATGAGGGCACCTGGAATGACACTTCACAAAATGCCATTATTTGTGTGGTCTATGCTAGTTACTGTGTTTTTGTTATTATTAGCTATACCTGTTTTGGCTGGCGCTATTACTATGTTACTTACTGACAGAAATTTTGGAACAAGTTTTTTCATTCCTGAAGGTGGTGGTGATCCAATATTATTTTTACACCTTTTT
416	815	NCBI;cellular organisms;Eukaryota;Sar;Stramenopiles;Oomycota;	0	0	0	0	0	0	0	0	0	0	0	0	0	0	0	0	0	0	0	0	0	0	0	0	0	0	135	0	0	0	1	0	TTTAGCTAATTCGTTATACCATCCAGGACCTTCTGTAGATTTATTAATATTTAGTTTACATCTTGCAGGAATTTCATCTATTTTAGGTGCTGTTAATTTTATTACTACTATTTTAAATATGCGATGTCCCGGATTAACAATGTTTAAATTACCTTTATTTGTTTGGTCAGTTTTAGTGACTGCTTTTCTTTTATTACTATCATTACCAGTATTAGCAGGTGGTATTACTATGGTATTAACAGATCGTCATATGAATACTGCTTTTTTTGAACCTAAAGGTGGAGGTGATCCTGTTTTATATCAACATTTATTT
417	816	NCBI;cellular organisms;Eukaryota;Sar;Stramenopiles;Ochrophyta;Bacillariophyta;	0	0	8	0	0	0	0	0	0	0	0	0	0	0	0	0	1	0	21	0	0	0	0	1	0	0	0	0	0	0	0	0	ATTATCAAGTGGTACAGCACATTCAGGTGGAGCTGTAGATTTAGCTATTTTTAGTTTACATGTTTCTGGAGCATCTTCAATATTAGGAGCTATTAATTTTATTTGTACTATTTTTAATATGAGAGTAAAAAGTTTATCATTTCATAAACTTCCGTTATTTGCTTGGTCAGTTTTAATTACTGCATTTTTATTACTGTTATCTTTACCAGTTTTAGCGGGAGCTATTACTATGCTTTTAACTGATAGAAATTTTAATACTACTTTCTTTGATCCTGCAGGTGGAGGTGATCCAATTTTATACCAACATTTATTT
418	817	BOLD;Arthropoda;Copepoda;89.64	0	29	2	6	0	0	0	1	0	0	2	2	0	0	0	0	0	0	0	0	0	50	0	0	0	0	0	0	0	0	0	0	GTTATCTTCTAAGACAGGTCAACCAGGTCCGGCAATGGATTTAGCAATATTAAGTTTACACGTAGCCGGAGCTTCCTCTATATTAGGAGCAATTAATTTCATCACTACTATTCTTAACATGAGAACACCTGGCATGACTTTACACAAAATGCCATTATTCTCTTGGTCAATTTTAGTAACAGCGTTTTTACTTTTACTATCATTACCAGTTTTAGCTGGAGCAATCACAATGCTTTTAACAGATAGAAACTTTGGGACTGCTTTTTTTGAAGCCCAAACAGGAGGAGATCCAGTTCTATTCCAACACTTATTT
419	819	NCBI;cellular organisms;Eukaryota;Opisthokonta;Metazoa;Eumetazoa;Bilateria;Protostomia;	0	0	0	0	0	0	27	0	0	0	267	0	0	0	0	0	0	0	0	0	0	0	0	0	0	0	0	0	0	0	0	0	TTAGCCAGAAACATCGCCCACGCCGGACCGTCAGTAGACCTAGCAATTTTTTCTCTCCATTTAGCAGGGGTATCGTCAATTCTGGGTGCGCTTAACTTCATCACTACGGTTATTAATATGCGGACAACAGGGCTACGTATGGAACGCGTACCATTATTCGTATGGTCAGTTCTGGTCACTGCTATTCTACTCCTCTTATCTCTCCCCGTACTGGCAGGCGCTATCACTATACTTTTAACAGACCGAAACTTAAATACTGCATTCTTCGACCCGGCAGGTGGCGGGGACCCTGTCCTATACCAGCACCTATTC
420	822	NCBI;cellular organisms;Eukaryota;Sar;Stramenopiles;	4	0	8	3	0	0	0	7	0	0	0	0	2	0	0	0	45	0	13	0	4	7	0	14	0	0	0	0	0	0	0	0	ATTAGCGAGTATACAAGCACACTCTGGACCTTCTATTGATTTAGCAATTTTCAGTCTTCACTTAGCTGGTGCTTCATCAATTCTGGGTGCTATTAACTTCATTACTACTATCGTAAACATGAGAGCTCCAGGTTTAACATTCCATAGAATGCCTTTATTCGTATGGGCTGTATTAATTACTGCGATTCTTCTATTATTATCATTACCTGTATTAGCTGGTGCAATTACTATGCTATTAACAGATAGAAACTTCAATACAACTTTCTTTGATCCAGCAGGTGGAGGTGACCCTGTGTTATATCAACACTTATTC
421	823	NCBI;cellular organisms;Eukaryota;Sar;Stramenopiles;Ochrophyta;Bacillariophyta;	0	11	71	0	0	0	0	0	0	0	0	0	0	0	0	0	0	0	31	2	0	0	0	1	0	0	0	0	0	0	0	0	ATTATCTAGCGGCAGCTCTCACTCAGGAGGTGCCGTTGATTTAGCTATTTTTAGTTTACATTTATCTGGAGCGTCTTCTATATTAGGAGCTATAAATTTTATTTGTACTATTTTTAATATGAGAGTAAAAAGTTTATCGTTTCATAAATTACCTTTATTTGTTTGGGCTGTTTTAATTACGGCTTTTTTACTTTTATTATCTTTACCTGTATTAGCCGGAGCAATAACAATGTTACTTACTGATAGAAATTTTAATACTACGTTTTTCGATCCTGCGGGAGGCGGAGATCCTGTATTGTACCAACACTTATTC
422	824	NCBI;cellular organisms;Eukaryota;Opisthokonta;Metazoa;Eumetazoa;Bilateria;Protostomia;Ecdysozoa;Panarthropoda;Arthropoda;	0	0	13	2	0	0	0	5	0	0	0	5	0	0	0	57	4	0	0	0	0	0	2	22	0	0	0	0	0	0	0	9	ACTTTCTAATAAACTTGGACACCCTGGGCCATCTGTTGATATGGCTATATTTGCACTACATTTAGCAGGAGCCTCATCAATTCTTGGAGCAGTTAACTTTATTACAACCATCTTGAATATGAGAACACCAGGCATGACTCTTCACAAAATGCCTTTGTTTGTATGGGCAATGTTGATAACAGCCTTTTTATTACTATTAGCCGTACCTGTATTAGCTGGCGCAATAACAATGTTACTCACTGATAGAAATTTTGGAACAACTTTTTTTAATCCTGCTGGTGGAGGTGACCCAGTATTGTTTCAACATTTATTT
423	827	NCBI;cellular organisms;Eukaryota;Opisthokonta;Metazoa;Eumetazoa;Cnidaria;Hydrozoa;Hydroidolina;	0	0	12	0	0	0	0	0	0	0	0	0	0	0	0	0	144	0	68	0	0	0	0	0	0	0	0	0	0	0	0	0	TTATCTACTAGTGAATTCCATTCTGGTGCTTCAGTGGACTTAGCTATTTTTAGTTTACATATTGCTGGTGCTTCATCAATTGCGGGTGCAATAAATTTTATTACAACTATTTTTAATTGCCGTGCTCGAGGTATGACTTTAGTCCGTATGCCTTTATTTGTGTGAGCTGTTTTAATAACAGCATTTTTATTATTATTGTCCTTACCAGTTTTAGCAGGAGCTATAACTATGTTATTAACCGATCGAAATATTGCTACGAGTTTTTTTGATCCGGCTGGTGGTGGTGATATAATCTTATATCAACATCTATTT
424	828	NCBI;cellular organisms;Eukaryota;Sar;Stramenopiles;Oomycota;	8	3	1	1	3	0	1	9	0	0	2	0	0	0	0	1	46	0	1	0	0	0	62	13	0	0	4	0	0	0	0	0	ATTATCTTCAATTCAAGCACATTCTGGTGGTTCTGTAGATTTAGCAATTTTTAGTTTACACTTAGCAGGTATTTCTTCAATTTTAGGTGCTGCTAATTTTATTACTACTATTATGAACATGCGTTGTCCTGGTATGACTATGCACAGAATGCCATTATTTGTATGATCTGTATTTATTACTGCAATTTTATTATTATTATCATTACCTGTATTAGCTGGTGCAATTACTATGTTATTAACTGATAGAAATTTTAACACTACTTTTTTTGACCCTGCTGGTGGTGGTGATCCAGTATTATATCAACATTTATTC
425	830	NCBI;cellular organisms;Eukaryota;Rhodophyta;Florideophyceae;	0	0	6	0	33	0	7	91	0	0	130	0	1	0	1	0	0	0	0	0	0	0	0	1	0	0	2	0	0	0	0	0	TTTATCATCAAAAACTGGTCAGCCAGGTCCTGCTATGGATTTAGCAATCTTAAGCTTACATGTGGCTGGGGCTTCTTCAATTCTAGGAGCAATTAACTTTATCACGACAATTTTAAATATGAGAACTCCTGGTATGACTTTACATAAAATGCCATTATTCTCATGGTCAATTCTTGTAACAGCATTTTTACTTTTATTATCATTACCAGTTCTTGCAGGAGCTATAACAATGCTTCTAACAGATAGAAATTTTGGAACTGCTTTCTTTGAAGCACAAACAGGAGGAGACCCAGTTCTATTTCAACACTTGTTT
426	835	NCBI;cellular organisms;Eukaryota;Opisthokonta;Metazoa;Eumetazoa;Bilateria;Protostomia;Ecdysozoa;Panarthropoda;Arthropoda;Mandibulata;Pancrustacea;Crustacea;Multicrustacea;Hexanauplia;Copepoda;Neocopepoda;Gymnoplea;Calanoida;Acartiidae;Acartia;Acartia californiensis;	0	0	1	0	0	1	1	0	0	0	0	0	0	144	1	0	0	0	0	0	3	0	0	0	0	0	1	0	22	3	1	0	TCTATCAAGAAACATTGCACACGCTGGAGCTTCTGTTGACTTTGCTATTTTTTCACTTCACCTTGCTGGTGCTAGATCTATTTTAGGGGCAGTTAATTTCATCTCAACGATCGGTAATTTACGTTCATTCGGGATAATATTAGATTTAATACCTTTATTTTCATGAGCTGTTTTAATTACTGCTGTTCTTTTATTATTATCTTTACCAGTTTTAGCTGGGGCGATTACTATACTTTTAACAGATCGAAACCTTAACTCTTCATTCTATGATTCTGGGGGTGGAGGTGATCCTATTTTATACCAACACCTATTC
427	836	NCBI;cellular organisms;Eukaryota;Sar;Stramenopiles;Ochrophyta;Bacillariophyta;Bacillariophyceae;Bacillariophycidae;Bacillariales;Bacillariaceae;Pseudo-nitzschia;Pseudo-nitzschia delicatissima;	4	0	0	0	0	0	0	0	0	0	1	0	0	0	0	0	45	0	5	0	0	0	0	0	0	0	0	0	0	0	0	0	TCTTTCAGGAGTTTTATCTCACTCTGGAGGTTCTGTGGATTTAGCAATCTTCAGTCTTCACTTATCAGGAGCAGCTTCAATTTTAGGTGCAATTAACTTTATTTGTACAATTGTAAATATGAGAACTGAGAGTTTACCATTCCACAAGCTTCCGTTATTTGTTTGGGCTGTTTTCATTACTGCCATTTTATTATTACTATCTTTACCAGTTCTAGCAGGTGCTATAACAATGCTTTTGACTGATAGAAATTTTAATACTACTTTTTTTGATCCCGCAGGTGGTGGAGACCCTGTGCTATTTCAGCATTTGTTT
428	837	NCBI;cellular organisms;Eukaryota;Opisthokonta;Metazoa;Eumetazoa;Bilateria;Protostomia;	7	7	42	38	0	1	0	0	1	0	0	0	4	0	0	11	118	0	2	0	0	2	29	41	0	0	0	0	0	0	0	17	CCTTAGTAATTTAGCAGGACATCCCGGTGCTGCAGTTGATATGGCAATATTTAGTCTACACTTAGCTGGTATGTCCTCAATTCTTGGTGCAATTAACATGATAGTTACGATCTTCAATATGAGAGCACCTGGAATGGGACTTTTTAAAATGCCATTGTTTGTCTGGTCAATTTTAATAACTGCATTTTTATTAATCCTAGCTCTTCCAGTGTTAGCTGGAGCAATTACCATGTTACTTACTGATCGTAATTTTGGAACTCACTTTTTCTCTCCCGAAGGAGGAGGTGATCCTATATTATTCCAGCATTTATTC
429	838	NCBI;cellular organisms;Eukaryota;Opisthokonta;	1	4	1	0	0	0	0	9	0	0	57	0	9	0	0	0	9	0	0	0	0	0	0	3	0	0	0	0	0	0	0	0	ATTATCATCAATAGAGTTCCATTCAGGAGGATCAATAGATTTAGCAATATTTAGTTTACATTTAGCGGGAATCTCATCAATATTAGGAGCATCAAACTTCATAACAACAATATTAAACATGAGAGCACCAGGAATGACAATGCATAGAATGCCATTATTTGTATGAGCAGTATTTATAACAGCAATATTATTATTATTATCATTACCAGTATTAGCAGGAGCAATAACAATGTTATTAACAGATAGAAACTTCAACACATCATTCTTTGATCCAGCAGGAGGAGGAGATCCAATCTTATATCAGCATTTATTC
430	839	NCBI;cellular organisms;Eukaryota;Opisthokonta;Metazoa;Eumetazoa;Bilateria;Protostomia;Ecdysozoa;Panarthropoda;Arthropoda;Mandibulata;Pancrustacea;Crustacea;Multicrustacea;Hexanauplia;Copepoda;Neocopepoda;Podoplea;Siphonostomatoida;Lernanthropidae;	0	0	0	0	0	0	0	0	0	0	0	0	0	0	0	0	0	0	0	0	0	0	0	0	0	0	0	0	135	0	0	0	GCTAAGAGGAAATGTGGCCCACTCAGGGCCATCTGTAGATTTTGCTATTTTTTCCTTACATCTAGCCGGGGTGTCTTCTTTATTAGGGGCTGTCAACTTTATTAGTACGTTTGGAAATTTACGCGGGCTAGGGGTCCAATTAGACCAAACTCCCCTGTTTGCCTGGTCTGTTCTTATCACTACGATTTTACTATTATTATCCTTACCCGTATTGGCTGGAGCAATTACTATACTACTAACGGACCGTAATTTAAACACATCATTTTATGATATTGGGGGAGGAGGGGATCCTATTTTATACCAACACTTGTTT
431	840	NCBI;cellular organisms;Eukaryota;Opisthokonta;Metazoa;Eumetazoa;Bilateria;Protostomia;Spiralia;Gnathifera <animals>;Chaetognatha;environmental samples <arrow worms,phylum Chaetognatha>;Chaetognatha environmental sample;	0	19	4	0	0	20	0	0	0	0	1	0	0	0	0	2	1	0	0	0	0	30	1	1	0	0	0	0	0	0	0	0	TCTTTCATCTAAAACAGGTCAACCAGGTCCTGCAATGGATTTAGCAATTCTGAGTTTACATGTGGCAGGTGCTTCTTCAATCTTGGGAGCAATAAATTTTATTACAACAATTTTGAATATGAGAGCACCAGGAATGACTTTACATAAAATGCCATTATTCTCATGGTCAATCTTAGTTACTGCGTTTTTGCTTTTATTGTCTTTACCAGTTTTAGCTGGAGCAATTACAATGCTTTTGACTGACAGAAATTTCGGCACTGCATTTTTTGAAGCTCAAACAGGTGGAGACCCAGTACTTTTTCAACACTTATTT
432	841	NCBI;cellular organisms;Eukaryota;Viridiplantae;Chlorophyta;Chloropicophyceae;Chloropicales;Chloropicaceae;Chloropicon;Chloropicon laureae;	0	0	1	2	7	0	0	8	2	0	14	0	0	0	2	0	5	0	0	0	11	0	24	29	0	0	29	0	0	0	0	0	TTTAAGTAGTATCACAGCACACTCTGGTGGTGCCGTAGATATGGCTATTTTTAGCTTACACGTTTCAGGTGCCGCAAGTATTTTAGGAGCTATTAACTTTATTACTACAGTTTTTAACATGCGTGCTCCAGGAATGACATTTCACCGTCTTCCACTTTTTGTATGGTCAGTTCTAATTACAGCATTCCTACTTCTTCTATCTCTACCAGTTTTAGCAGGAGGTATCACAATGCTTCTAACAGACAGAAACTTCAATACAAGTTTCTTTGACCCTGCAGGTGGTGGTGACCCTGTGTTATTCCAGCACCTATTT
433	842	NCBI;cellular organisms;Eukaryota;Sar;Alveolata;Dinophyceae;Peridiniales;Heterocapsaceae;Heterocapsa;Heterocapsa circularisquama;	1	0	0	4	2	0	0	0	147	1	2	2	0	0	0	0	0	0	0	0	0	0	0	0	0	0	0	0	0	0	0	0	TCTATCCACTTCTTTCATGTCTCTTTCTCCTTCTTCTATCTACTTCCTTATCGTTGGTCTTGCTGTTTCCGGTATTTCTTCTGCTCTAACTTCTCTAAATTTCCTACTAACTATTACTAACATGCGTGTTTACTCCATGTCTCTAAAGCTAATGCCTCTATTCAACTGGTCTATTCTTATCACTTCTAATCTACTACTTATGTGTCTACCAATTCTTACTGGTGCTCTAATCATGGTTCTATCTGACCTTAATCTTAATACTCTATTCTATGATCCAGTCTTCGGTGGTGATCCTGTTCTTTATCAGCATCTTTTC
434	843	NCBI;cellular organisms;Eukaryota;Opisthokonta;Metazoa;Porifera;Demospongiae;Heteroscleromorpha;Merliida;Hamacanthidae;Hamacantha;Hamacantha falcula;	0	0	4	0	9	0	0	12	0	0	21	0	0	0	0	0	0	0	3	0	5	7	19	8	0	0	7	0	0	0	0	10	TTTATCTTCTAAAGCAGGCCAACCTGGACCAGCTATGGATTTTGCAATATTGAGTTTGCACATAGCAGGAGCCTCTTCAATATTAGGAGCTGTCAATTTTATAACTACAATTTTAAATATGAGAACACCTGGTATGACTTTACATAAAATGCCATTATTCGCTTGGTCAATTTTAGTTACTGCATTTTTGTTGTTGCTTTCTTTACCAGTATTAGCTGGAGCGATAACAATGTTATTGACTGATAGAAACTTTGGAACAGCTTTCTTTGAGGCACAAACAGGAGGAGACCCAACTTTATTTCAACATTTATTT
435	845	BOLD;Cnidaria;78.9	2	0	0	0	0	0	0	0	0	0	0	0	3	0	0	0	18	0	0	0	0	24	3	0	0	0	0	0	0	0	0	0	TCTTTCTAGTAATCTGGGACACTCAGGTCCTGCTGTTGATATGGCAATATTAAGTTTACATTTAGCGGGGGCATCTTCTATTTTAGGAGCAATCAACTTCATTACAACCATTTTTAATATGAGAACTCCTGAGATGACATTACATAGAATGCCTTTGTTTGTCTGGTCCATTTTAGTTACAGTTTTTTTATTAGTATTATCTTTGCCCGTGTTAGCTGGAGCAATTACAATGCTTTTGACAGATCGTAATTTTGGGACAGCGTTTTTTGCTCCAGAGGGCGGTGGTGACCCTATTTTATTTCAGCATTTGTTT
436	848	BOLD;Ochrophyta;79.73	3	0	46	16	1	0	0	11	0	0	14	0	0	0	0	0	14	1	45	0	0	26	0	2	0	0	0	0	0	0	0	0	TCTTTCTAACAAACTTGGACACGCCGGACCTTCTGTTGACATGGCAATTTTTGCCCTACATTTAGCAGGAGCTTCTTCAATCCTAGGAGCTGTTAACTTTATAACAACAATACTTAATATGAGAACTCCGGGAATGACTCTTCATAAAATGCCACTTTTTGTTTGGGCTATGTTAATAACAGCCTTTTTACTTTTACTTGCTGTTCCTGTTTTAGCTGGTGCTATAACGATGTTATTAACAGATAGAAATTTTGGGACAACTTTTTTTAACCCTGCTGGTGGTGGAGATCCTGTACTTTTCCAACACTTATTT
437	850	NCBI;cellular organisms;Eukaryota;Eukaryota incertae sedis;Telonemida;	0	2	1	0	0	0	0	0	0	0	0	2	1	0	0	0	10	0	1	0	0	21	0	0	0	0	1	0	0	0	0	0	ATTATCTAGTATTATTGCACATTCTGGTCCTGCTGTTGATTTAGGTATCTTCAGTTTACACTTAGCGGGTGCATCTTCTATTATGGGTGCTAATAATTTTATTACTACAATTATTAACATGCGAGGTCCTGGTATTACTTGGCACCGATTACCATTATTTGTTTGGTCTGTATTTATTACAGCTATTTTATTATTATTATCTTTACCTGTATTAGCTGGTGCGATCACTATGTTATTAACTGATCGAAACTTTAATACAACTTTCTTTGACCCAGCTGGTGGTGGAGATCCTATTTTATTCCAGCACTTATTC
438	853	NCBI;cellular organisms;Eukaryota;Opisthokonta;Metazoa;Eumetazoa;Bilateria;Protostomia;Ecdysozoa;Panarthropoda;Arthropoda;Mandibulata;Pancrustacea;Crustacea;Multicrustacea;Hexanauplia;Copepoda;Neocopepoda;Gymnoplea;Calanoida;	0	0	0	0	0	0	0	0	0	0	0	0	0	0	0	1	0	0	0	0	0	0	0	0	0	0	0	0	0	0	0	0	TTTATCTAGAAACATTGCTCATGCTGGAAGATCAGTAGATTTTGCTATTTTTTCTCTTCATTTAGCTGGTGTCAGGTCTATTTTAGGGGCTGTAAACTTTATTAGAACCTTAGGTAATCTTCGAGTATTTGGTATGCTTTTAGACCGAATACCATTATTTGCCTGAGCTGTTTTAATTACAGCTATTTTATTATTACTGTCTTTGCCTGTCTTAGCTGGAGCTATTACTATATTATTAACAGATCGTAACTTAAATACTTCTTTTTATGATGTGGGGGGTGGGGGTGATCCTATTCTCTATCAACATTTATTT
439	854	NCBI;cellular organisms;Eukaryota;Sar;Stramenopiles;Ochrophyta;Bacillariophyta;	0	38	0	2	0	0	0	0	0	0	5	1	3	0	0	0	2	0	0	0	0	0	5	0	0	0	0	0	0	0	0	0	ATTATCTAGTGGTACTTCTCACTCTGGCGGTGCCGTAGATTTAGCTATTTTTAGTTTACACCTATCAGGAGCTTCTTCTATTTTAGGAGCAATTAATTTTATTTGTACTATCTTTAATATGAGAGTTAAAAGTTTAGCTTTTCATAAACTTCCTTTATTTGTATGGGCAGTTTTAATAACAGCGTTCCTTTTATTACTTTCTTTACCAGTTTTAGCGGGAGCTATTACTATGCTTTTAACAGATAGAAATTTTAACACAACTTTTTTTGACCCAGCAGGAGGAGGAGATCCTGTTTTATATCAACATTTATTT
440	855	BOLD;Cnidaria;78.9	2	8	7	8	0	0	0	2	0	0	4	0	4	1	0	0	11	0	0	0	0	43	0	0	0	0	0	0	0	0	0	0	TCTCTCTAGTAATCTAGGACACTCAGGTCCTGCTGTTGACATGGCAATATTAAGTTTACATTTAGCGGGGGCATCCTCTATTTTAGGAGCAATTAACTTCATAACAACCATTTTTAATATGAGAACTCCTGAAATGACATTACATAGAATGCCTTTATTTGTCTGGTCTATTCTAGTTACAGTTTTTTTATTAGTTCTATCTTTACCCGTGTTAGCGGGAGCAATTACAATGCTTTTGACAGATCGTAATTTTGGGACGGCGTTTTTTGCTCCAGAGGGCGGTGGTGACCCTATTCTATTTCAGCATTTGTTT
441	858	NCBI;cellular organisms;Eukaryota;Rhodophyta;Florideophyceae;Rhodymeniophycidae;	0	0	0	0	0	0	0	0	0	0	0	0	0	0	0	119	0	0	0	0	0	0	25	0	0	0	0	0	0	0	0	127	ATTATCAAATAAACTTGGTCATGCAGGACCGTCAGTTGATATGGCAATTTTTGCTCTCCATTTAGCTGGAGCATCTTCTATTTTAGGGGCAGTTAATTTTATTACTACTATTTTAAATATGAGAACTCCTGGAATGACTATCCATAAAATGCCTCTTTTTGTATGGGCAATGCTGATTACAGCTTTTTTGTTATTACTTGCTGTACCTGTTTTAGCAGGTGCAATAACAATGTTACTAACTGATAGGAATTTTGGAACAGCATTCTTCAATCCTGCAGGTGGTGGAGATCCAGTTCTGTTTCAACATTTGTTT
442	860	NCBI;cellular organisms;Eukaryota;Opisthokonta;Metazoa;Eumetazoa;Bilateria;Protostomia;Ecdysozoa;Panarthropoda;Arthropoda;Mandibulata;Pancrustacea;	0	0	0	0	0	229	0	0	0	0	0	0	0	0	0	0	0	0	0	0	0	0	0	0	0	0	0	0	0	0	0	0	TTAGCGAGGAATATTGCCCATGCTGGGAGCTCAGTTGATTTTGCAATTTTTTCTCTTCATCTAGCAGGAATCTCCTCTATTTTAGGAGCTATTAATTTTATTAGAACATTAGCCAACTTGCGAGTTTTTGGGATACTTCTAGAACAAATACCTCTTTTTGCCTGGGCAGTTTTGGTGACTGTTATTTTACTTCTCCTTTCTTTGCCTGTATTGGCGGGGGCTATTACTATGCTTTTAACAGACCGAAACTTAAATACAACTTTTTATGATGCAGGGGGGGGTGGAGATCCTATCCTTTATCAACATCTCTTC
443	861	NCBI;cellular organisms;Eukaryota;Opisthokonta;Metazoa;Eumetazoa;Bilateria;Protostomia;Ecdysozoa;Panarthropoda;Arthropoda;	0	0	2	0	0	0	0	0	0	0	0	0	0	0	0	95	2	0	6	0	0	0	8	0	1	0	0	0	0	0	0	62	GTTATCAAATAAACTTGGTCATGCAGGACCATCAGTTGATATGGCAATTTTTGCACTGCATTTAGCTGGAGCTTCTTCAATACTAGGAGCAGTGAATTTTATTACAACTATCCTAAATATGAGAACGCCAGGAATGACTATTCACAAGATGCCTCTTTTTGTTTGGGCAATGCTTATTACAGCGTTCTTATTATTACTTGCTGTTCCTGTTCTTGCAGGTGCTATTACTATGCTTCTTACTGATAGAAATTTTGGAACGACATTCTTTAACCCTGCGGGTGGTGGAGATCCAGTTTTATTCCAACATTTATTT
444	862	NCBI;cellular organisms;Eukaryota;Sar;Stramenopiles;Ochrophyta;Bacillariophyta;	0	9	0	0	0	0	0	0	0	0	0	0	0	0	0	0	0	0	0	0	0	3	0	0	0	2	0	0	0	0	0	0	TTTGTCTAGTAATACAGGTCACTCAGGGGCAGCAGTAGATTTAGCCATTTTCAGTTTGCATGTTTCAGGAATATCTTCTATTTTAGGAGCTATAAATTTCATTTGCACTATTTTTAATATGAGAGTTAAAAGTTTAGCTTTTCATAAGCTTCCTTTATTTGTATGGGCTATTTTGATTACAGCATTTTTACTTTTACTATCACTTCCTGTTTTAGCTGGAGCAATAACAATGTTGTTGACTGACAGAAACTTTAATACGACCTTTTTTGATCCTGCTGGAGGCGGAGATCCTGTATTGTATCAGCATTTGTTT
445	864	NCBI;cellular organisms;Eukaryota;Opisthokonta;Metazoa;Eumetazoa;Bilateria;Protostomia;	4	19	27	0	0	0	0	0	0	0	3	0	18	0	0	1	18	0	2	0	0	60	0	0	0	0	0	0	0	0	0	5	TTTGAGTTCCGTTACTGGACATAGCTCTCCTGCAGTTGATATGGCTATTTTTTCACTTCATCTAGCTGGAGCCTCTTCGATATTGGGTGCTGTAAATTTTATTACCACTATTCTTAATATGAGAGTACCTGGAATGACACTTCATAAAATGCCTTTATTTGCATGGGCCATGTTAGTAACCGCTTTTCTTCTTTTGTTAGCTGTTCCTGTTTTAGGTGGAGCTATCACTATGCTGCTTACTGATCGTAACTTCGGAACTACTTTTTTTGATCCAGCTGGCGGAGGAGACCCTGTTCTTTTCCAACACCTTTTT
446	865	NCBI;cellular organisms;Eukaryota;Opisthokonta;Metazoa;Eumetazoa;Bilateria;Protostomia;	0	0	0	0	0	223	0	0	1	1	0	0	63	1	0	0	1	0	2	0	0	52	0	5	0	0	0	0	1	0	0	3	TCTTTCTGCTAATCTTGCTCATGCTGGGCCTTCGGTAGATTTAGCTATTTTTTCTTTACATCTTGCAGGAGCATCTTCTATTTTAGGGGCACTTAATTTTATTACTACAGTTTTAAATATACGTGTTCAAGGCCTTCGCATGGAACGTATGCCTTTATTTGTATGAGCTGTATTCATTACGGCTATTTTATTACTTCTATCTCTCCCTGTTTTAGCTGGAGCTATTACAATACTTTTAACTGATCGTAATATTAACACTACGTTCTTTGACCCTGCAGGAGGCGGAGACCCAGTATTATACCAACACCTTTTC
447	868	NCBI;cellular organisms;Eukaryota;Opisthokonta;Metazoa;Eumetazoa;Bilateria;Protostomia;Ecdysozoa;Panarthropoda;Arthropoda;Mandibulata;Pancrustacea;Crustacea;Multicrustacea;Malacostraca;Eumalacostraca;Eucarida;Decapoda;Pleocyemata;Brachyura;Eubrachyura;Thoracotremata;Ocypodoidea;Ocypodidae;Ucidinae;Ucides;Ucides occidentalis;	137	37	6	0	0	0	22	0	22	1	214	0	0	4	0	0	16	0	0	0	0	0	0	0	0	0	0	0	0	0	0	0	ACTTTCTACTTCATTCATGTCTCTCTCCCCCTCATCAATCTATTTCCTTATCACTTCCCTTGCTATTTCAGGTATATCATCTGCCCTAACTTCACTAAACTTCCTCTTAACTATTTCTCTCATGCGCGTATACTCTATGTCTCTCAAATTATTACCTCTATTCAACTGGTCTATACTAATCACTTCTAATCTCTTACTCATGTGTTTACCAATTCTTACTGGAGCTCTAATTATGGTTCTCTCTGATTTAAATATGAATACACTCTTCTATGATCCTGTCTTTGGTGGCGACCCCGTCCTATATCAACATCTTTTC
448	870	NCBI;cellular organisms;Eukaryota;Opisthokonta;Metazoa;Eumetazoa;Bilateria;Protostomia;	0	0	0	0	0	213	0	0	0	0	0	6	0	0	0	0	0	1	0	84	0	0	0	0	0	2	0	0	0	0	0	1	CCTTAGATCTTTTTTATTTCATGGAGGAGCTTCTGTTGACTTTACTATTTTTAGTCTACACCTAGCCGGGGTCTCTTCTTTACTCGGAGCAGTGAATTTTATTACCACTATTCTCAATTTACGAACACTAGGTATACTAATAGATCGAATACCTTTATTTCCTTGAGCAGTTTTTATTACAGCTATTTTACTACTTCTTTCACTTCCCGTGTTAGCTGGTGCAATTACTATACTTCTAACAGATCGTAATCTCAACACATCTTTTTATGACCCGATAGGGGGCGGTGACCCTGTGCTATACCAACACTTATTT
449	871	NCBI;cellular organisms;Eukaryota;Opisthokonta;Metazoa;Eumetazoa;Bilateria;Deuterostomia;Chordata;Craniata;Vertebrata;Gnathostomata;Teleostomi;Euteleostomi;Actinopterygii;Actinopteri;Neopterygii;Teleostei;Osteoglossocephalai;Clupeocephala;Otomorpha;Ostariophysi;Otophysi;Cypriniphysae;Cypriniformes;Cobitoidei;Nemacheilidae;Paracanthocobitis;	0	21	0	0	0	0	0	0	0	0	0	0	0	0	0	0	0	10	0	0	0	0	0	0	0	0	0	0	134	0	0	0	ACTTTCAGGTATTGCTGTCCATTCTTCCTGTGCTATTGATGAGGCTATCTTTGCTTTACATCTTTCCGGTGCAGCATCCATTGGTTCTTCTATCAATTTCCTAACTACTATTCTTGTATCTGGTGGACTTTCTATTCATACTCCTCTTCTTGTCTGAGCTCTTGCTTTAACATCTGTCCTTCTAATTCTGTCACTTCCTGTTCTAGCTGCTGGTATTACAATGCTCTTACTTGATCGTCAGTGGTCTACATCATTCATGGACTATCATTTCGGTGGTGATCCTGTACTTTTCCAACACTTCTTC
450	873	BOLD;Haptophyta;84.03	24	0	0	0	5	0	6	1	0	0	0	0	0	0	59	0	32	0	1	0	0	0	0	0	0	0	6	3	0	0	0	0	ACTATCAAGTGTTCAAGCGCACTCAGGAGGTTCTGTAGATTTAGCAATTTTCAGTCTTCATTTATCAGGAGCTTCATCAATTCTTGGAGCAATTAACTTTATTACTACTATTTTTAATATGAGAGCTCCAGGAATGTCAATGCACCGTCTTCCATTATTTGTGTGGGCAGTATTGATTACCGCATTTTTATTATTGCTTTCTTTACCTGTATTAGCAGGAGCAATTACCATGCTATTAACAGATAGAAACTTTAATACATCATTCTTTGATCCAGCAGGAGGAGGAGATCCTGTGTTGTATCAGCATTTATTC
451	875	NCBI;cellular organisms;Eukaryota;Opisthokonta;Metazoa;Eumetazoa;Bilateria;Protostomia;Ecdysozoa;Panarthropoda;Arthropoda;Mandibulata;Pancrustacea;	0	0	0	0	0	0	0	0	0	0	0	0	0	0	0	0	0	0	0	0	0	0	165	0	0	0	0	0	0	0	0	0	TTTGGCAAGAAATATTGCCCATGCGGGAAGTTCAGTTGATTTTGCAATTTTTTCCCTCCATTTAGCTGGTATTTCTTCTATTCTGGGAGCAATTAATTTTATTAGAACCTTGGCTAATTTACGTGTCTTCGGAATACTATTGGAGCAGATACCTCTTTTTGCCTGGGCTGTTTTAGTGACTGTAATTCTTTTACTACTCTCATTACCTGTGTTAGCGGGTGCTATTACGATACTCCTAACAGACCGAAACTTAAATACAACTTTTTATGATGCCGGTGGAGGTGGAGACCCTATTCTCTATCAGCATCTTTTT
452	878	NCBI;cellular organisms;Eukaryota;Sar;Alveolata;Dinophyceae;	0	24	0	0	0	0	0	1	0	0	1	0	0	0	0	0	1	0	0	0	0	78	1	0	0	0	0	0	0	0	0	0	ATTAAGTACTTCTTTTATGAGTTTATCACCTTCAAGTACAGCTTATATTATTTTTGGATTATTAATATCAGGTATATCCTCATGTCTAACATCTCTTAATTTTTATATTACAATATTAAATCTGAGATCTTATTATCTTACATTAAATATTATGCCATTATTCCCTTGGTCTCTCTTAATAACAGGAGGAATGCTTTTATTAACATTACCAATCTTATCTGGAGCTCTATTAATGATCTTAGCTGATCTTCATTCTAATACACTTTTCTTTGATCCAATCTTTGGAGGAGATCCTATATTCTATCAACATTTATTT
453	879	NCBI;cellular organisms;Eukaryota;Sar;Alveolata;Dinophyceae;	3	18	32	32	71	0	7	9	2	0	100	10	4	1	2	2	22	0	3	0	92	3	101	7	0	37	0	0	0	0	0	0	ATTAAGCACTTCTTTCATGAGTTTATCACCTTCAAGTACAGCTTTCATAGTCTTTGGATTATTAATCTCAGGTATATCCTCATCTCTTACATCTCTTAACTTTTGGACAACAATTCTAAATATGAAATCTTATTATCTGACATTAAAGACTATGGCATTATTCCCTTGGGCTCTCTTGATAACAGGAGGAATGCTTTTATTAACATTACCAATCTTATCAGGAGCTCTTTTAATAGTCTTGGCTGATCTTCATTCTAATACACTTTTCTTTGATCCAATTTTTGGTGGAGATCCTATATTCTATCAATACTTATTT
454	881	NCBI;cellular organisms;Eukaryota;Sar;Stramenopiles;Ochrophyta;Chrysophyceae;Chromulinales;Chromulinaceae;Pedospumella;Pedospumella sinomuralis;	0	0	3	4	0	0	3	6	4	0	37	0	14	0	0	0	2	0	0	0	0	62	0	0	0	0	0	0	0	0	0	0	TTTGAGTAGTGTTCAAGCTCACTCAGGACCTTCTGTTGATTTAGCAATTTTTAGTCTTCACTTATCTGGGGCAGCTTCTATTTTAGGTGCTATTAACTTTATTACTACTATTTTTAATATGAGAGCACCAGGTATGACTATGCATAGATTACCTTTATATGTTTGGTCTATTTTGATTACTTCTTTTTTATTATTATTATCATTACCAGTATTAGCAGGTGCTATTACAATGCTTTTAACTGATAGAAACTTTAATACTACTTTCTTTGATCCTGCAGGAGGGGGTGATCCAGTATTATATCAACATTTATTT
455	883	NCBI;cellular organisms;Eukaryota;Sar;Stramenopiles;Ochrophyta;	0	0	0	0	0	20	0	0	0	0	0	0	0	0	0	0	0	1	0	0	0	0	1	0	0	0	0	0	278	0	0	0	CCTTTCTAGTGTACAAGCTCATTCAGGCCCTTCGGTAGATCTTGCAATTTTCAGTTTACATTTAGCTGGTACATCTTCTATTTTAGGTGCTATTAATTTTATCACTACTATTATAAATATGCGTAGTCCAGGAATGACTATGCATAAATTACCTCTGTTTGTATGGGCAATCTTAATTACAGTGGTACTACTATTATTATCACTACCTGTATTAGCTGGTGCAATTACTATGCTATTAACAGACCGTAATTTTAATACAACTTTTTTCGATCCAGCTGGAGGTGGAGATCCTGTATTGTATCAGCATCTTTTC
456	887	BOLD;Mollusca;84.34	4	0	2	8	41	0	0	10	11	0	8	0	12	0	0	0	8	0	0	2	0	42	0	0	0	0	0	0	0	0	0	0	TTTAGCGAGTGCAACAGCGCATTCAGGGCCTTCTGTTGATTTGGCTATTTTTTCATTGCATTTAGCGGGTGCGTCATCTATTTTAGGTGCTTTAAATTTTATTACTACCATTTTTAATATGCGTGCACCTGGTATGACCATGCATCGTATGCCACTATTTGTTTGGTCTGTTTTAATTACTGCGTTTCTATTATTGTTATCTTTACCTGTTTTAGCTGGTGCTATAACTATGTTGTTAACTGATCGAAATTTTAATACAACTTTTTTTGACCCTGCTGGTGGTGGTGACCCTGTTTTATATCAGCATTTATTT
457	893	NCBI;cellular organisms;Eukaryota;Sar;Stramenopiles;Ochrophyta;Bacillariophyta;	7	0	70	2	0	0	0	0	0	0	0	0	0	0	0	1	60	0	6	0	0	0	0	0	0	0	0	0	0	0	0	0	ATTATCTAGTATTATTGCACACTCAGGTGGTTCAGTTGATTTAGCAATTTTTAGTTTACACGTTTCAGGTGCAGCTTCGATTTTAGGAGCAATTAATTTTATTTGTACAATTTTTAATATGCGTGTTAAAAGTCTATCTTTTCACAAATTACCACTATTTGTATGGGCAATATTAATTACAGCAGTTTTGTTATTACTATCATTACCAGTTTTAGCAGGAGCCATTACAATGTTATTAACTGATAGGAATTTCAATACAACATTTTTTGATCCTGCAGGTGGAGGTGATCCTGTCCTATATCAGCATTTGTTT
458	894	NCBI;cellular organisms;Eukaryota;Sar;Alveolata;Dinophyceae;	0	0	1	0	0	1	6	0	0	0	793	0	0	8	0	1	0	0	0	0	0	0	0	0	0	0	0	0	0	0	0	0	ATTAAGCACTTCTTTCATGAACTTACCACCTTCAAGTACAGGAAATCTTACCTTTGGATTATTACTCTCAGGTATATCTTCATGTCTCACATCTCTTAACTTTTGGATAATGCCATTATTTCCTTGGGCTCTCTTGATTACTGGAGGAATGCTTTTATTAACATTACCAATCTTATCAGGAGCTCTTCTAATGGTCTGCTGATCCTCATTCATCCAATTTGGAGGAGACCCTATATTCTATCAACTTGACACTTATTT
459	898	NCBI;cellular organisms;Eukaryota;Sar;Stramenopiles;Ochrophyta;Bacillariophyta;Bacillariophyceae;Bacillariophycidae;Bacillariales;Bacillariaceae;Nitzschia;Nitzschia palea;	0	0	0	0	0	0	0	0	1	0	118	0	0	0	0	0	0	0	0	0	0	0	0	0	0	0	0	0	0	0	0	0	TTTATCAGGTATTGTAGCCCATTCAGGTGGTTCTGTTGACTTGGCAATTTTTAGCCTTCATCTTTCAGGAGCTGCTTCTATTTTAGGGGCAATAAATTTTATTTGTACAATTGTTAATATGCGTACTGAAAGCTTGCCTTTTCATAAATTACCATTGTTTGTTTGGGCTATTTTTATTACAGCAATTTTATTGTTATTGTCCTTACCAGTTTTAGCAGGTGCGATTACAATGCTGTTGGCTGATAGAAATTTTAATACAACTTTTTTTGATCCTGCGGGAGGTGGTGACCCTGTTCTTTTCCAGCACTTATTT
460	901	NCBI;cellular organisms;Eukaryota;Opisthokonta;Metazoa;Eumetazoa;Bilateria;Protostomia;Spiralia;Lophotrochozoa;Platyhelminthes;Trematoda;Digenea;Plagiorchiida;Pronocephalata;Paramphistomoidea;Gastrothylacidae;Fischoederius;Fischoederius cobboldi;	0	0	0	0	0	18	14	117	1	0	0	1	0	0	0	0	0	0	0	0	0	0	0	0	0	0	0	0	0	0	0	0	GTTGAGTTATTGTGATAGTCATTCTGGTCCTAGTATTGAGTTGGCGGTTTTGAGTTTGCATTTGAGTGGTATGAGTAGTTTGCTTGGTGCTATTAATTTCATTGCTACTGTCTTCAATATGCGTGCTCCTGGTTTGTCGATCTATGATATGTCGTTGTATTGTTGGACGATGTTGGTTACGGCAGTGTTGTTGCTTTTGTCTATTCCTGTGTTGGCTGCTGGTATTACTATGTTGCTGAGTGATCGTTTGTTCTCTACTGGATTTTATGATGTTAGTTCGGGTGGCGATTGTTTGTTGTTTCAGCATTTGTTC
461	902	BOLD;Ochrophyta;81.2	7	0	4	0	2	0	0	4	0	0	30	0	17	0	0	0	70	0	0	0	0	54	0	0	0	0	0	0	0	0	0	1	ATTAAGTAGTGTTCAAGCACACTCTGGTCCTTCTATTGATTTAGCAATTTTCAGTCTTCACTTAGCTGGTGCTTCTTCTATTTTAGGTGCAGCAAACTTCATTACAACCATTATTAATATGCGTGCTCCAGGTATCACTATGCATAAATTACCTTTATTCGTATGGGCTGTGCTTATTACCGCTGTACTACTTCTGTTATCACTACCGGTATTAGCAGGTGCGATTACCATGTTACTTACAGACCGTAACTTCAATACCACCTTCTTTGACCCTGCAGGTGGAGGTGATCCTGTATTATACCAACACCTTTTC
462	906	NCBI;cellular organisms;Eukaryota;Opisthokonta;Metazoa;Eumetazoa;Bilateria;Protostomia;Ecdysozoa;Panarthropoda;Arthropoda;	131	0	0	0	0	0	0	0	0	0	0	0	0	0	0	0	0	0	0	0	0	0	0	0	0	0	0	0	0	0	0	0	TTTGTCAAGAATTTTAGGTCATAGAGGAAACTCAGTTGATCTAGCAATTTTTAGATTACATTTAGCAGGAGTTTCTTCAATTTTGGGAGGAATTAATTTTATAGTTACTCTTTGAAATACTCGAAGAGTCGAATATAATTTTGAAAAAATTAGACTTTTCGTTTGAAGAATTATTATTACAGTACTACTTTTAGTTCTGTCTTTACCTGTTCTTGCTAGAGGAATTACAATACTTTTATTAGATCGTAACATTAGAACCTCTTTTTTTGACCCTATAGGAGGAGGGGACCCTATTTTATTTCAACATTTATTT
463	907	NCBI;cellular organisms;Eukaryota;Sar;Stramenopiles;Ochrophyta;PX clade;Phaeophyceae;	0	0	0	7	5	0	0	27	0	0	62	0	3	1	0	0	23	0	0	2	0	122	0	0	0	0	0	0	0	0	0	0	GCTGAGTAGTGTTCAGGCTCATTCGGGTCCTTCGGTTGATTTGGCTATATTCAGCTTGCATTTGTCAGGTGCTGCGTCAATTTTAGGTTCGATTAATTTTATTACAACTATTTTTAATATGCGAGCTCCAGGTATGAGTTTGCATCGATTACCATTATTCGTTTGGTCAATTCTTGTAACTTCTTTTTTATTGTTGCTTTCCTTACCTGTGCTGGGTGGTGCAATTACAATGTTGCTTACGGATCGTAATTTAAATACAACTTTTTTTGATCCGGCGGGGGGTGGAGACCCTGTGCTTTTTCAACATCTTTTT
464	908	NCBI;cellular organisms;Eukaryota;Sar;Stramenopiles;	0	0	0	0	0	0	0	6	0	0	0	0	0	0	0	0	29	0	0	0	0	0	0	0	0	0	0	0	0	0	0	0	TTTGAGTGGTATTGAAGCTCATTCCGGACCATCAGTTGATTTGGCTATTTTTAGTTTGCATCTAGCTGGTGCATCATCTATTTTGGGTGCCGTAAATTTTATTACAACAATTTGTAATATGCGAGCTCCGGGTATGACAATGCATCTTTTGCCTTTGTTTTGTTGGGCTGTTTTGATTACAGCTGTATTGCTATTGTTGTCTTTGCCTGTACTTGCTGGAGCAATTACAATGCTTTTGTGTGATCGAAATTTTAATACAACATTTTTTGATCCAGCTGGTGGTGGAGATCCTCTACTATATCAACATTTGTTT
465	909	NCBI;cellular organisms;Eukaryota;Opisthokonta;Metazoa;Eumetazoa;Ctenophora;Tentaculata;Cydippida;Pleurobrachiidae;Pleurobrachia;Pleurobrachia bachei;	0	0	0	0	2	1	1	1	2	0	0	0	0	0	1	0	36	0	0	2	0	3	0	0	0	1	0	0	0	0	1	0	ATATTCATCTTATCCTGGTTCTTCTTGATTATCCACCGATTTTATTATTTTTTCTTTACATTTAGCAGGTGCTAGTTCTATTTTATCCTCAATAAATTTTATAGTCACTGTTTTCGTATTGCCTATAAATTATAACTTCTGATTTTTCCAATATCCTCTTTTTATAGTCGCTCAACTTACTGTAAGTTTTCTTTTATTAATTTCTCTACCAGTCTTAGCTGCTGCAATTACCATGTTACTTTTTGATCGTAATTTTTCCACTTACTTTTTTAGTAATGTTAATGGAGGTGATGCTCTACTCTATCAACATCTGTTT
466	910	NCBI;cellular organisms;Eukaryota;Opisthokonta;Metazoa;Eumetazoa;Bilateria;Protostomia;Spiralia;Gnathifera <animals>;Rotifera;Eurotatoria;Monogononta;Pseudotrocha;Ploima;Brachionidae;	0	0	105	0	0	0	0	0	0	0	0	0	0	0	0	0	0	0	0	0	0	0	0	0	0	0	0	0	0	0	0	0	TTTATCAGATTCTAAGTATCATAGAGGCATTTCAGTTGATTTAGCTATTTTTAGACTTCATATTGCAGGTATTTCATCAATTTTAGGAAGAATTAATTTTCTTACAACTATTATTTGTTCACGTACTACTAAGATAGTATCTTTAGATCGTATGCCTTTAATGATTTGAGCATTAGCTATTACAGCAGTTCTTTTAATTACTAGACTACCTGTATTAGCAGGTGCTATTACTATGCTTTTAACAGATCGTAATTTTAATACTTCATTTTTTGATCCTGCTGGTGGTGGTAATCCAGTTTTATACCAACATTTATTT
467	911	BOLD;Chlorophyta;84.56	0	0	0	0	0	0	0	9	0	0	8	0	2	0	0	0	7	0	0	0	0	31	0	0	0	0	0	0	0	0	0	0	ATTATCAAGTATTCAAGCTCATTCAGGACCTTCTGTTGATTTGGCTATTTTTAGTTTACATATTGCAGGTGCTTCGTCTATTTTAGGTGCGGCTAATTTTATTACTACTATTTTAAATATGCGTGCTCCTGGTATGGGAATGCATCAAATTCCTTTATTTGTTTGGTCAGTTTTAATTACAGCTGTTTTATTGTTATTATCACTTCCTGTGTTAGCTGGTGCCATTACTATGTTATTAACTGATCGTAATTTCAATACTACTTTCTTTGATCCTGCAGGTGGTGGTGATCCAGTACTTTACCAACATTTATTT
468	913	NCBI;cellular organisms;Eukaryota;Opisthokonta;Metazoa;Eumetazoa;Bilateria;Protostomia;Spiralia;Lophotrochozoa;Mollusca;Gastropoda;Caenogastropoda;Caenogastropoda incertae sedis;Abyssochrysoidea;Provannidae;Alviniconcha;Alviniconcha kojimai;	0	6	7	0	0	0	0	0	0	0	0	0	0	0	0	0	63	0	0	0	0	0	13	0	0	0	0	0	0	0	0	0	ATTAGCTAGTGTTCAAGCACACTCAGGTCCATCTGTTGACCTTGCAATTTTTTCATTGCACTTAGCTGGTGCTTCTTCTATTTTAGGAGCTGTAAATTTCATTACAACTATCGTTAACATGCGTTGCCCTGGTATGACAATGCACCGTCTTCCACTATTTGTGTGGTCGGTGTTAATCACAGCAGTGTTGTTGTTGCTTTCGCTTCCAGTGTTGGCAGGAGCTATTACTATGTTATTGACAGATCGTAATTTTAATACAACTTTCTTTGATCCAGCTGGAGGAGGTGACCCTGTGTTATATCAGCACCTTTTC
469	915	NCBI;cellular organisms;Eukaryota;Sar;Stramenopiles;Ochrophyta;PX clade;Phaeophyceae;Ectocarpales;Chordariaceae;Microspongium;	0	0	0	0	0	0	0	0	0	0	0	0	0	0	0	0	0	0	0	0	0	0	208	5	0	0	12	0	0	0	0	0	TTATCTACCTATGGACATTCTGGTGCATCTGTAGATATGGCTATTCTTTCATTGCATTTGGCGGGTGCTTCATCAATTTTATCTTCTATTAATTTTATTACAACTATCTTCAACATGCGTGCGCCTGGCATGACACTTCATAAAATGCCTCTTTTTGTATGGTCAATTCTAATAACTGTTTTTCTATTATTATTGTCTCTTCCAGTGCTCGCTGGCGCGATTACAATGTTGTTAACTGATAGAAATTTTGGGACAGCTTTTTACGACCCTTCTCAAGGGGGCGATCCACTTCTTTACCAGCATTTATTT
470	921	NCBI;cellular organisms;Eukaryota;Sar;Alveolata;Dinophyceae;Peridiniales;Heterocapsaceae;Heterocapsa;Heterocapsa circularisquama;	24	0	15	2	0	0	0	0	0	0	0	0	0	0	0	0	10	0	0	0	0	0	0	0	0	0	0	0	0	0	0	0	TCTTTCTACCTCTTTCATGTCTCTCTCTCCATCTTCTATTTATTTCCTAATTGTTGGTCTAGCAATTTCTGGTATTTCTTCTGCTCTAACTTCCCTAAACTTTCTACTAACTATTACTAACATGCGTGTTTACTCTATGTCTATCTCTATTATGCCACTTTTCAACTGGTCTATTCTAATCACCTCTAATCTTCTTCTAATGTGTCTTCCTATTCTTACTGGTGCTCTTATCATGGTTCTATCTGATCTTAATCTTAACACTCTATTCTATGATCCTGTCTTTGGTGGTGATCCAGTTCTATACCAGCATCTATTC
471	922	BOLD;Ochrophyta;84.62	0	0	0	0	0	0	0	0	0	0	0	0	0	0	0	0	0	1	0	0	0	0	0	0	0	0	0	0	119	0	0	0	ATTATCAAGTGTACAAGCTCACTCAGGGCCTTCAGTAGATTTAGCAATTTTCAGTTTACACTTAGCAGGTGCGTCTTCTATTTTAGGAGCTATTAACTTTATTACAACCATTTTTAACATGCGGTCTCCGGGTATGAAAATGCATAACATGCCTTTAATGGTATGGGCTGTTTTAGTTACTGCCTTTTTACTTCTTTTATCATTACCTGTTTTAGCAGGAGCTATTACAATGCTATTAACAGATAGAAATTTTAATACTACGTTCTTCGACCCAGCAGGTGGAGGAGATCCCGTATTATACCAACACCTATTC
472	924	NCBI;cellular organisms;Eukaryota;Opisthokonta;Metazoa;Eumetazoa;Bilateria;Protostomia;Ecdysozoa;Panarthropoda;Arthropoda;Mandibulata;Pancrustacea;	1	27	35	0	0	0	0	47	0	0	21	0	8	0	0	6	16	0	0	0	0	14	11	2	0	1	0	0	0	0	0	7	TTTGAGTTCTATTACTGGACATGGTTCTCCTGCTGTTGATATGGCTATTTTTTCACTTCACTTAGCTGGAGCTTCTTCAATATTGGGCGCAGTAAACTTTATTACTACAATTCTTAATATGAGAGCACCTGGTATGACTCTTCATAAAATGCCTTTGTTTGCTTGGTCTATGTTAGTGACTGCTTTTCTTCTTTTGTTAGCTGTTCCTGTTTTAGGTGGAGCTATTACTATGCTTCTTACTGATCGTAACTTCGGAACTACATTTTTTGATCCAGCTGGTGGAGGAGATCCTGTTCTATTCCAGCACCTTTTC
473	925	NCBI;cellular organisms;Eukaryota;Sar;Alveolata;Dinophyceae;	0	0	0	0	0	0	0	0	0	0	0	0	0	0	0	0	0	0	0	0	1	0	4	0	0	0	175	0	0	1	0	0	ATTATCCACTTCTTTCATGACTTTATCACCTTCAAGTACAGGAAATCTTATCTTTGGATTATTAATCTCAGGTATATCCTCATGTCTCACATCTCTTAATTTTTGGACAACAATTCTAAATCTGAGATCTTATTATCTGACATTAAAGACTATACCATTATTCCCTTGGGCTTTCTTGATTACAGCCTTCATGCTTTTATTAACATTACCAATCTTATCTGGAACACTTCTTTTAGTCTTGGGTGATCTTCATTCTAATACACTTTTCTTTGATCCAATATTTGGAGGAGATCCTATATTCTATCAACACTTATTT
474	929	BOLD;Ochrophyta;83.76	0	0	0	0	1	0	0	0	0	0	0	0	0	0	0	1	0	0	0	0	0	0	0	0	0	0	0	0	34	0	0	0	ATTAAGTAGCGTGCAAGCACACTCTGGACCTGCTGTTGATTTAGCAATTTTTAGCTTACATTTATCAGGTGCATCATCAATTTTGGGTGCAATTAATTTTATTACTACAATTTTAAATATGCGTGCTCCTGGTATGGGTATGGAAAAAATCCCATTATTTGTATGGTCAGTTTTTGTTACAGCATTTCTTTTAGTTTTATCACTTCCTGTTTTAGGTGGTGCAATCACTATGTTATTAACTGATAGAAACTTTAATACAACATTTTTTGATCCTGCTGGAGGTGGTGATCCAGTATTATTCCAGCACTTATTC
475	930	NCBI;cellular organisms;Eukaryota;Opisthokonta;Metazoa;Eumetazoa;Bilateria;Protostomia;Ecdysozoa;Panarthropoda;Arthropoda;Mandibulata;Pancrustacea;Crustacea;Multicrustacea;Malacostraca;Eumalacostraca;Eucarida;Decapoda;Pleocyemata;Brachyura;Eubrachyura;Thoracotremata;Grapsoidea;Sesarmidae;Sesarma;Sesarma rectum;	0	1	0	0	0	0	0	0	0	0	0	0	0	0	0	0	0	0	0	0	0	0	1	1	0	0	126	0	0	0	0	1	GCTTAGTTTTATAGACCCTAGTCATGGGATTGATGTTGCTATAATATCTTTGGTGATCGCTGGTGCCTCTTCAATTTTGGCTTCTATCAATATTATAGTTACTATAATTAATATGAGGCATAAACCTATGGGTTTGTGGTCTATGCCTTTATTTGTATGGTCGATTCTGCTTACTGCCGTTATGATGCTTGTAGTGATGCCGGTAATAGCTGGTGCATTGACTATGCTTTTAGCTGATAGGAATTTTGGTTCTAGTTTCTATAATGTAGCAGGCGGAGGAGACCCCGTATTATATCAACATTTATTT
476	933	NCBI;cellular organisms;Eukaryota;Sar;Alveolata;Dinophyceae;	0	0	0	0	0	0	0	0	0	0	0	0	0	0	0	0	0	0	0	0	0	0	6	0	0	0	1	0	116	0	0	0	ATTAAGTACTTCTTTTATGAGTTTATCACCTTCAAGTACAGCTTTTTTAATCTTTGGATTATTAATGTCAGGTATATCTTCATGTCTCACTTCTATTAACTTTTTAATAACTATATTAAATCAGAGATCTTATTATATAACATTAAAGACTATGCCATTATTTTCTTGGGCTCTTTTTATAACAGGAGGAATGCTTTTATTAATATTACCAATCTTATCAGGAGCTCTTTTTATGGTCTTGGCTGATCTTCATTCTAATACACTTTTCTTTGATCCAATCTTTGGTGGAGATCCTATATTTTATCAACATTTATTT
477	935	NCBI;cellular organisms;Eukaryota;Opisthokonta;Metazoa;Eumetazoa;Bilateria;Protostomia;Ecdysozoa;Panarthropoda;Arthropoda;Mandibulata;Pancrustacea;Crustacea;Multicrustacea;Malacostraca;Eumalacostraca;Peracarida;Isopoda;Flabellifera;Sphaeromatidae;unclassified Sphaeromatidae;	0	0	0	0	0	0	0	0	0	0	0	0	0	0	0	0	0	3	0	0	0	0	0	0	0	0	0	0	115	0	0	0	TTTATCTATAAAAGCGGAAGGACCTTCAGTAGACTTTTTAATAGTAACTCTTCATATAAATGGAACTTCCTCTTTATTAAACGCTATCAACATGTTTACAACTATAGTAAACCAACGTTCTATGCCTATGTATAATTTACAGATGTATACGTGATCTATACTAATTACTTCCTTTTTAGTTATAACAGCAATTCCTGTTTTAGCTGCAGGTTTATATATGTTATTTTCCGATAGACATTTTGGTTCATGTTTTTTTCAACCAAAAGGAGGAGGGGATCCTGTTCTTTACCAACATCTTTTT
478	937	NCBI;cellular organisms;Eukaryota;Sar;Stramenopiles;Ochrophyta;Bacillariophyta;	0	32	0	0	0	0	0	0	0	0	7	0	1	0	0	0	0	0	0	0	0	20	12	0	0	0	0	0	0	0	0	0	ACTTTCCGGTATAATAGCTCACTCAGGAGGTTCTGTTGATTTAGCTATTTTTAGTTTACATGTTTCAGGTGCAGCTTCTATTTTAGGTGCAATAAATTTTATATGTACAATATTAAATATGCGTGTAAAAAGTTTAGCTTTTCATAAATTACCTTTATTTGTTTGGGCTATTTTAATAACTGCTGTATTACTTTTATTATCACTTCCTGTTTTAGCTGGTGCAATTACAATGTTGTTAACTGATAGAAATTTTAATACAACTTTTTTTGACCCTTCTGGAGGAGGTGATCCTGTTTTATACCAGCACTTGTTT
479	938	NCBI;cellular organisms;Eukaryota;Opisthokonta;	0	0	2	1	4	0	0	43	0	0	45	0	0	0	0	0	0	0	0	0	0	3	6	0	0	0	0	0	0	0	0	0	TTTGTCCTCAAAAGCTGGACAACCTGGACCAGCTATGGATTTAGCTATTTTAAGTTTGCACTTAGCGGGTGCCTCATCAATTTTAGGAGCAGTAAATTTTATTACTACTATTCTAAATATGAGAACACCAGGCATGACATTACATAAGATGCCTTTGTTTGCGTGGTCTATATTAGTGACTGCGTTTTTATTATTATTATCTTTACCAGTATTAGCTGGAGCAATAACAATGTTGTTAACAGATAGAAATTTTGGCACCGCCTTCTTTGAAGCCCAAACAGGAGGTGATCCAGTTTTATTCCAACACTTATTT
480	939	NCBI;cellular organisms;Eukaryota;Sar;Stramenopiles;Bigyra;Labyrinthulomycetes;Thraustochytrida;Thraustochytriaceae;Botryochytrium;Botryochytrium radiatum;	0	0	0	0	44	0	0	0	1	0	17	1	0	0	0	0	15	0	0	0	0	12	2	1	0	2	0	0	0	0	0	0	TCTTTCTAGTGTACAAGCTCACTCAGGACCATCTGTAGATCTTGCCATTTTTAGTTTGCATGTTTCAGGGGCATCTTCTATTTTGGGTGCTATTAATTTTATTACTACTATTTTCAATATAAGAGCTCCTGGTATAACAATACACAGACTTCCATTGTTTTGTTGGTCAGTTTTGATTACAGCATTCTTGCTACTGTTGTCTCTACCTGTACTAGCAGGAGCAATTACTATGTTGCTATGTGACAGAAATTTTAATACTACTTTTTTTGATCCTGCTGGAGGAGGTGATCCAGTTCTTTATCAACATTTGTTC
481	940	NCBI;cellular organisms;Eukaryota;Opisthokonta;Metazoa;Eumetazoa;Cnidaria;Hydrozoa;Hydroidolina;	0	0	8	0	0	0	0	1	0	0	5	6	0	0	0	0	44	0	0	0	0	0	108	2	0	0	27	0	0	1	0	0	TTTGTCTTCAAGTGAATTTCATTCTGGCCCATCTGTTGATCTTGCAATTTTTAGTTTGCATATTGCAGGTGCTTCTTCTATAGCAGGAGCAATAAATTTTATTACTACTATATTTAATTGCAGGTGTAGGGGTATGACTTTTGTACGTATGCCTTTGTTTGTTTGGGCAGTTTTAATAACAGCTTTTTTATTATTACTTTCTTTGCCTGTCTTAGCTGGTGGCATAACTATGCTACTAACTGATAGAAATCTAGCAACAAATTTTTTTGATCCTGCAGGAGGTGGTGACATAATTTTGTATCAGCATTTATTT
482	944	BOLD;Porifera;75.44	0	2	0	0	0	0	0	0	0	0	0	0	10	0	0	0	0	0	0	0	0	48	0	0	0	0	0	0	0	0	0	0	ACTATCTGGTTCTACTGGTTCACCAGGAATGGCTATGGACCTTGCAATATTTGCATTACATTTAGCCGGTGCATCTTCAATATTAGGTGCTGCTAACTTTATTACAACAATTTTTAACATGAGAGCTCCAGGTATGACCCTGCATAAAATGCCCCTATTTGTTTGGTCTATGCTTGTTACAGCTTTCCTACTATTATTAGCTGTCCCAGTCCTTGCTGGTGCTATAACTATGTTGTTAACAGACAGAAACTTTGGAACTAATTTTTTTGTTGCAGAAGGTGGTGGAGATCCAATCCTATTCTTACATTTATTT
483	945	NCBI;cellular organisms;Eukaryota;Rhodophyta;Florideophyceae;Rhodymeniophycidae;Ceramiales;Rhodomelaceae;Polysiphonioideae;Polysiphonia;Polysiphonia homoia;	4	0	17	0	0	0	0	0	0	0	0	0	0	0	0	5	26	0	35	0	0	0	29	3	0	0	0	0	0	0	0	0	ATTATCTAACAAGCTTGGTCATGCAGGACCATCAGTTGATATGGCAATTTTTGCACTCCATTTAGCTGGAGCTTCATCAATACTAGGAGCGGTAAATTTCATTACAACTATTTTAAATATGAGAACGCCAGGAATGACTATTCATAAAATGCCTCTTTTTGTTTGGGCAATGCTCATTACAGCTTTCTTACTATTGTTAGCCGTTCCTGTTCTTGCAGGGGCTATTACTATGCTTCTAACTGATAGAAATTTTGGAACTACCTTTTTTAATCCTGCAGGTGGAGGAGATCCAGTTTTATTTCAACACTTATTC
484	946	NCBI;cellular organisms;Eukaryota;Sar;Stramenopiles;Ochrophyta;Bacillariophyta;Coscinodiscophyceae;	0	1	16	0	0	0	0	0	0	0	0	0	0	0	0	0	0	0	2	0	0	0	0	0	0	0	0	0	0	0	0	0	ATTATCGAGTGGTACTGCTCATTCAGGTGGTGCTGTAGATTTAGCAATTTTTAGTTTACATCTTTCAGGAGCTTCTTCTATATTAGGAGCGATTAATTTTATTTGTACAATTTTTAACATGAGAGTTAAAAGTTTATCATTTCATAAACTACCTTTATTTGTTTGGGCTGTTTTAATAACAGCGTTTTTATTATTGTTATCTTTACCTGTTTTAGCCGGAGCAATTACAATGTTGTTAACAGATAGAAATTTTAATACAACCTTTTTTGACCCAGCTGGTGGAGGCGACCCTGTTTTATATCAACATTTATTT
485	948	NCBI;cellular organisms;Eukaryota;Opisthokonta;Metazoa;Eumetazoa;Cnidaria;Hydrozoa;Hydroidolina;Anthoathecata;Aplanulata;Sympagohydridae;Sympagohydra;Sympagohydra tuuli;	0	1	2	1	0	0	0	0	0	0	0	0	1	0	0	14	2	0	0	0	0	5	3	10	0	0	30	0	0	0	0	7	TTTGTCTAGTGCTTTAGGACATGCAGGACCAGCTGTAGATATGGCTATTTTAAGTTTGCATCTTGCTGGTGCTTCCTCAATTCTTGGAGCAATAAATTTCATAACTACTATTTTTAATATGAGAACACCTGGTATGACATTACATAAGATGCCTCTTTTTGTTTGGTCTATTCTTGTTACAGTATTTTTATTAGTACTCTCACTGCCAGTTCTTGCAGGAGCAATAACTATGCTGTTAACAGATAGAAACTTTGGTACTGCTTTTTTTGCTCCAGAAGCAGGTGGAGATCCTATTCTTTTTCAGCATCTGTTC
486	951	BOLD;Rhodophyta;81.05	0	0	0	114	0	0	0	0	0	0	0	0	0	0	0	0	0	0	0	2	0	0	0	0	0	0	0	0	0	0	0	0	ATTGTCAAGTATAAATGCTCATTCAGGAGTTTCGGTAGATTTGGCCATTTTTAGTTTACATTTATCAGGTGCTGCTTCGATTTTAGGTGCAATAAATTTTATATGTACGATATTAAATATGCGAAGCAAAGGCTTATATATGCATAGATTACCATTATTTGTATGGTCTATATTAATTACAGCAGTGCTATTATTACTTTCTTTACCTGTATTAGCTGGAGCTATTACTATGCTATTGACAGATCGAAATTTTAATACTACTTTTTTTGATCCTGCGGGTGGTGGTGATCCCGTATTATTTCAACATTTATTT
487	953	NCBI;cellular organisms;Eukaryota;Opisthokonta;Metazoa;Eumetazoa;Bilateria;Protostomia;Ecdysozoa;Panarthropoda;Arthropoda;Mandibulata;Pancrustacea;Crustacea;Multicrustacea;Thecostraca;Cirripedia;Thoracica;Thoracicalcarea;Balanomorpha;Balanoidea;Balanidae;unclassified Balanidae;	0	0	0	0	0	0	16	0	0	1	0	99	0	0	0	0	0	0	0	0	0	0	0	0	0	0	0	0	0	0	0	0	TCTTTCGAGTAATATCGCCCATTCAGGTGCTTCGGTAGACTTATCTATTTTCTCACTACATTTAGCCGGAGCATCTTCAATTCTTGGAGCTATTAACTTCATGTCTACTGTCATTAACATACGAGCAGAAACTTTAACATTTGATCGTTTACCATTATTTGTATGAAGAGTCTTTATTACTGTAATTTTACTTTTACTTTCTCTTCCAGTTCTAGCGGGTGCAATTACTATACTTCTTACGGACCGTAATCTTAATACTTCCTTTTTTGACCCTACGGGAGGAGGTGATCCTATTCTTTACCAACACCTATTT
488	955	NCBI;cellular organisms;Eukaryota;Sar;Stramenopiles;Ochrophyta;PX clade;Phaeophyceae;	0	0	0	0	14	0	3	5	0	0	35	0	0	1	0	1	0	0	0	0	0	57	0	0	0	0	0	0	0	0	0	0	GCTAAGTAGTGTTCAGGCTCATTCGGGTCCTTCGGTTGATTTGGCTATATTTAGCTTGCATTTGTCAGGTGCTGCATCAATTTTAGGTTCAATTAATTTTATTACAACTATTTTTAATATGCGAGCTCCTGGTATGAGTTTACATCGATTACCGTTATTCGTTTGGTCAATTCTTGTAACTTCTTTTTTATTGTTGCTTTCCTTACCTGTGTTGGGTGGTGCGATTACTATGTTGCTTACGGATCGTAATTTAAATACAACTTTTTTTGATCCGGCGGGAGGCGGAGACCCTGTGCTTTTTCAACATCTTTTT
489	957	BOLD;Cnifaria;75.11	0	0	5	0	1	0	0	0	0	0	7	0	1	0	0	0	0	0	1	0	0	125	0	2	0	0	0	0	0	0	0	8	TCTTTCAAGCTCGGCAGGTTCTCCAGGTATGGGTATGGACCTTGCAATATTTTCACTACATTTAGCAGGTGCGTCTTCAATACTAGGTGCAGCAAACTTTATAACAACGATATTTAACATGAGGGCACCTGGAATGACACTTCACAAAATGCCATTATTTGTGTGGTCAATGCTTGTTACAGTGTTTTTGTTATTGTTAGCTATACCTGTACTAGCTGGTGCAATAACGATGTTACTTACTGATAGAAATTTTGGAACAAGTTTTTTTATTCCAGAAGGTGGTGGTGATCCTATTCTATTTTTGCATCTTTTT
490	958	NCBI;cellular organisms;Eukaryota;Opisthokonta;Metazoa;Eumetazoa;Cnidaria;Hydrozoa;Trachylinae;Trachymedusae;Geryoniidae;Liriope;Liriope tetraphylla;	0	1	0	0	0	0	0	0	0	0	0	0	0	0	0	0	0	0	0	0	0	0	0	0	0	0	0	0	0	0	0	0	TTTATCAGGAGCCCAAGCTCATTCAGGCCCTTCAGTAGATATGGCTATTTTTAGTCTACATGCTGCAGGAGCTTCATCTATTGCGGGTGCAATGAACTTTATTACTACTATCTTTAACATGAGAGCGCCTGGAATGACTATGGACAGATTACCTCTTTTCGTATGGTCCGTTTTAATTACAGCAGTTTTATTATTACTTTCTTTACCTGTATTAGCTGGTGCTATTACTATGCTTTTAACAGATAGAAATTTTAATACAACTTTTTTTGACCCGGCAGGTGGAGGAGACCCTATCTTATACCAACATTTATTT
491	965	NCBI;cellular organisms;Eukaryota;Opisthokonta;Metazoa;Eumetazoa;Cnidaria;Hydrozoa;Hydroidolina;Leptothecata;Plumulariidae;Plumularia;Plumularia setacea;	0	0	0	0	0	0	0	0	0	0	0	0	0	0	0	76	0	0	0	0	0	0	0	0	0	0	0	0	0	0	0	64	ATTATCGAACTCAGATTTTCACGGCGGTCCGGCCGTGGATCTTGCAATTCTAAGTCTCCACCTAGCCGGCGCTTCTTCGATATTGGGCGCCATTAATTTTATAACAACCATTATTAACATGCGTGCCCCGGGCATGACTTTTCACAAGATGCCTTTGTTTATTTGGGCCGCCCTGATTACCGCTTTTCTACTTTTGCTGGCTATTCCGGTTTTAGCTGGTGCCCTCACTATGCTGCTGACAGATCGCAACTTTGGAACTGCTTTTTTTGAGCCAGCCGGCGGTGGGGACCCCATTTTCTGGCAGCACCTGTTC
492	966	BOLD;Porifera;77.35	0	0	71	0	0	0	0	0	0	0	0	0	0	0	0	0	0	0	38	0	0	0	0	0	0	0	0	0	0	0	0	0	ATTAGCTGGAATTTATGCGCATTCTGGTTGTTCTGTAGATATAGCAATATTTAGTTTACATTTAGCAGGTACTTCTTCAATAGCAGGTGCTATTAATTTTATAGTAACTATTTTTAATATGAGAGCTAGGGGTATGTTTATAAGTCGTTTGCCTTTATTTGTATGAACAGTTTGGGTTACAGCATTACTTTTAGTATTGTCTTTACCTGTGTTAGCTGGTGGTATTACAATGCTATTGTTCGATAGGAATTTAAATACTACCTTTTTCGATGCTGCAGGTGGTGGAGATCCTGTGTTATATCAACATATATTT
493	969	BOLD;Mollusca;75.9	0	0	14	0	0	0	0	0	0	0	0	0	0	0	0	4	36	0	16	6	0	0	18	0	0	0	32	0	0	0	0	9	GCTTTCTAGTGCAGATGGGCATCCCGGTCCAAGTGTTGATTTGGGCATACTTAGTTTACATTTGGCAGGAGCCTCGTCGATCCTTGGCGCCATTAATTTGATAACAACTATTCTCAATATGCGTGCTTCTGGCATGACGCTGCACAAGATGCCACTTTTTGTTTGGTCCATGCTGGTTACAGCATTCCTTCTTTTGCTTGCAATTCCGGTTTTAGCAGGTGCGCTAACAATGTTGCTAACTGATCGAAATTTTGGAACTACATTTTTCGAACCTGCAGGTGGTGGTGATCCACTCTTGTGGCAGCATTTGTTC
494	972	NCBI;cellular organisms;Eukaryota;Sar;Stramenopiles;Ochrophyta;Bacillariophyta;Mediophyceae;Lithodesmiophycidae;Lithodesmiales;Lithodesmiaceae;Helicotheca;Helicotheca tamesis;	0	97	0	0	0	0	0	0	0	0	0	0	0	0	0	0	1	0	0	0	0	0	0	0	0	0	0	0	0	0	0	0	TTTATCTAGCGGAAGTTCTCATTCTGGAGGGGCCGTAGATTTAGCTATTTTTAGCTTGCATCTTTCTGGTGCGTCTTCTATTTTAGGAGCTATAAATTTCATATGTACTATTTTTAACATGAGAGTAAAAAGTTTGTCTTTTCATAAAATGCCTTTATTTGTTTGGGCTGTTTTAATAACTGCCTTTTTATTATTGTTATCTTTACCTGTGCTTGCAGGTGCTATTACCATGTTATTAACAGATAGAAACTTTAATACTACATTCTTTGATCCTGCTGGTGGAGGTGATCCTGTTCTTTACCAACATTTGTTT
495	973	NCBI;cellular organisms;Eukaryota;Opisthokonta;Metazoa;Eumetazoa;Bilateria;Protostomia;Spiralia;Lophotrochozoa;Mollusca;Gastropoda;Heterobranchia;Euthyneura <gastropods>;Tectipleura;Cephalaspidea;Bulloidea;Haminoeidae;Roxaniella;unclassified Roxaniella;Roxaniella sp. A TRO-2019;	0	0	0	0	0	0	103	0	1	0	0	0	0	0	0	0	0	0	0	0	0	0	0	0	0	0	0	0	0	0	0	0	TCTTTCCGGGCCCATTGCTCATGGTTCTTGTGCTGTAGATTTAGCTATTTTCTCGCTACACTTAGCCGGAATATCTTCAATTTTAGGAGCCATTAATTTTATTACGACAATTATTAACATGCGAGCGCCTGGTATTACCTTCGAGCGACTGAGCCTGTTCGTTTGATCAGTCTTTGTAACTGCCTTTCTTCTTCTTCTCTCTTTACCCGTATTAGCTGGGGCAATTACTATATTACTGACAGACCGTAACTTTAACACAAGGTTCTTTGATCCTGCAGGAGGTGGGGATCCTATTTTATACCAGCACTTGTTC
496	975	NCBI;cellular organisms;Eukaryota;Opisthokonta;Metazoa;Eumetazoa;Bilateria;Protostomia;Ecdysozoa;Panarthropoda;Arthropoda;	0	0	1	0	0	0	0	0	0	0	0	0	0	0	0	0	12	0	50	2	0	0	22	0	0	0	0	0	34	0	0	0	ATTATCTAACAAGCTTGGTCATGCAGGGCCATCAGTTGATATGGCAATTTTTGCACTCCACTTAGCTGGAGCTTCCTCAATTCTGGGAGCGGTAAATTTCATTACAACTATTTTGAATATGAGAACCCCAGGAATGACTATACACAAAATGCCTCTCTTTGTATGGGCAATGCTCATTACAGCTTTTTTATTATTACTAGCCGTTCCTGTTCTTGCAGGGGCTATTACTATGCTCCTAACTGATAGAAATTTTGGAACAACATTTTTTAACCCCGCAGGTGGTGGAGATCCAGTTTTATTTCAACACTTATTT
497	976	NCBI;cellular organisms;Eukaryota;Sar;Stramenopiles;Ochrophyta;Bacillariophyta;	0	59	0	0	0	0	0	0	0	0	0	0	2	0	0	0	0	0	0	0	0	3	0	0	0	0	0	0	0	0	0	0	ATTGTCAAGCGGAACTTCTCATTCAGGAGGTGCTGTGGACTTAGCTATTTTCAGCCTGCACCTTTCAGGAGCGTCATCTATTTTAGGAGCAATTAATTTTATATGTACAATTTTTAATATGCGAGTAAAAAGTTTAGCGTTTCATAAATTACCGTTATTTGTGTGGGCAGTATTAATAACAGCGTTTTTATTATTATTATCGTTACCAGTGTTGGCAGGAGCAATTACTATGTTATTGACTGATAGAAATTTTAATACAACTTTCTTTGATCCTGCAGGCGGTGGAGATCCTGTTTTATACCAACATTTATTT
498	977	NCBI;cellular organisms;Eukaryota;Sar;Alveolata;Dinophyceae;Gymnodiniales;Gymnodiniaceae;Gyrodinium;	0	0	0	1	2	0	41	0	0	0	248	0	0	5	0	0	1	0	1	0	0	38	0	0	0	0	0	0	0	0	0	0	ATTAAGCACTTCTTTTATGAGTTTATCACCTTCAAGTACAGCTTATCTTATCTTTGGATTATTAATATCAGGTATATCCTCATGTCTCACATCTCTTAACTTTTGGACAACAATTCTAAATCTGAGATCTTATTATCTGACATTAAAGATTATGCCATTATTCCCTTGGTCTCTCTTGTTAACAGGAGGAATGCTTTTATTAACATTACCTTTATTCTCAGGAGCTCTTCTAATGGTTTTGGCTGATCTTCATTCTAATACACTTTTCTTTGAATCATTCTTCGGAGGAGATCCTATCTTCTATCAACACTTATTT
499	981	BOLD;Cnidaria;79.08	0	0	0	0	0	0	0	0	0	0	0	0	0	0	0	0	0	0	0	1	0	0	70	13	0	0	28	34	0	0	0	0	ATTATCATCTTCAATAACACATTCTGGTGGTTCTGTAGATTATGCTATTTTTAGTTTACATATTGCAGGAGCTTCGTCAATAGCTGGTGCTATAAATTTTATTATTACAATAATAAATATGAGATGTTTAGGAATGAGCATGGATAGATTACCATTATTTTGTTGAGCTATATTAATTACAGTTGTATTATTATTATTAACATTACCAGTATTAGCTGGTGCAATAACTATGTTATTAGTTGATAGAAATTTTAATGGTAGTTTTTTTGATGTAGAAGGAGGAGGAGATCCTATTTTATACCAACATTTATTT
500	982	NCBI;cellular organisms;Eukaryota;Opisthokonta;Metazoa;Eumetazoa;	0	3	2	0	0	0	0	0	0	0	0	0	1	0	0	0	0	0	0	1	0	91	0	0	0	0	0	0	0	0	0	0	TCTCTCCAGTAATCTTGGGCATTCTGGTCCTGCTGTTGATATGGCTATACTTAGTTTACACTTGGCTGGAGCCTCTTCAATTTTAGGAGCAATAAACTTTATTACTACTATTTTTAATATGAGAACTCCTGAGATGACTTTACACAGAATGCCTCTTTTTGTGTGGTCTATCTTAGTTACAGTTTTCTTGCTAGTATTATCATTACCTGTATTAGCAGGTGCGATAACAATGTTACTGACTGACCGTAATTTTGGCACTGCGTTTTTCGCTCCTGAAGGCGGAGGTGATCCTATTTTATTTCAGCATTTATTT
501	984	NCBI;cellular organisms;Eukaryota;Opisthokonta;Metazoa;Eumetazoa;Cnidaria;Anthozoa;Hexacorallia;Scleractinia;Faviina;Montastraeidae;Montastraea;	1	0	0	0	0	0	0	0	0	0	0	1	9	0	0	0	0	0	0	0	0	91	0	0	0	0	0	0	0	0	0	0	TCTATCAAGTAATCTTGGACATTCTGGTCCTGCCGTTGATATGGCTATACTTAGTTTGCATTTGGCTGGAGCCTCTTCAATTTTAGGAGCAATAAACTTTATTACTACTATTTTTAACATGAGAACTCCTGAAATGACTTTACACAGAATGCCTCTTTTTGTGTGGTCTATTTTGGTAACAGTTTTCTTACTAGTATTATCATTACCTGTGTTGGCAGGTGCGATAACAATGTTACTTACTGATCGCAATTTCGGCACAGCATTTTTCGCGCCTGAAGGTGGAGGTGATCCTATTTTATTTCAACATTTATTT
502	985	NCBI;cellular organisms;Eukaryota;Sar;Stramenopiles;Ochrophyta;PX clade;Phaeophyceae;	0	17	0	0	0	0	0	3	0	0	9	0	5	0	0	0	6	0	0	0	0	31	0	0	0	0	0	0	0	0	0	0	ATTAAGTTCAATTCAAGCACACTCAGGTCCTTCAGTTGATCTTGCCATTTTTAGTTTACACGTAAGTGGTGCCTCATCAATTTTAGGTGCAATTAACTTCATTACTACTATTTTTAATATGCGTGCGCCAGGTATGACTATGCACCGTTTGCCTTTAATGGTATGGGCTGTATTAATTACTGCATTCCTATTGTTATTATCGTTACCAGTGCTAGCGGGAGCAATTACTATGTTGCTAACCGATCGTAACTTTAATACAACCTTTTTTGATCCAGCTGGTGGTGGTGATCCGGTATTATACCAACATTTATTC
503	986	NCBI;cellular organisms;Eukaryota;Amoebozoa;Discosea;	0	0	1	0	0	0	0	2	0	0	0	0	0	0	0	127	0	0	0	0	0	0	0	0	0	0	0	0	0	0	0	0	TTTAGCTTCAATTGAATATCATTCAGGTGCTGCAGTAGATTTAGCTATATTTAGCTTACACTTAGCAGGGTTTCATCTTTGTTAGGGGCTATAAATTTTATTACTACAGTAATAAATATGCGAACACCAAAATTAAAATGGAATCGTTACCTTTATTTGTATGGGCTGTATTTATTACTGCGTTCTTACTATTATTATCTTTACCTGTTCTTGCGGGAGGTATTACAATGTTATTAACAGATCGTAATTTTAATACAAGTTTTTTTGATCCTTTAGGGGGAGAGATCCAATACTATATCAGCATTTATTT
504	987	NCBI;cellular organisms;Eukaryota;Sar;Stramenopiles;Ochrophyta;Bacillariophyta;Fragilariophyceae;Fragilariophycidae;Licmophorales;Licmophoraceae;	0	0	3	1	0	0	0	1	0	0	0	0	0	0	0	0	5	0	6	0	0	0	43	4	0	0	1	0	7	0	0	0	ACTAGTCTTGCAAACAGGAGACGCTTTTCCATTTTTAATTTTTGCGGTCCATTTTTTAGGCATTTCGTCAATAATGGGTGCAATTAATATTATTGCTACAGTGTTTAATATGCGTGCTCCTGGGATGACATTGATGAAGATGCCATTATTTGTTTGGACATGGGTTATTACATCATTCTTATTGATTGCATCGCTACCAGTTCTTGCAGGTGGCGTAACAATGTTACTAACTGATAAATATTTTGGAACAAGTTTTTTTGATGCTGCAGGTGGCGGTGACCCCGTTTTATTTCAACATATTTTC
505	988	NCBI;cellular organisms;Eukaryota;Haptista;Haptophyta;Prymnesiophyceae;Phaeocystales;Phaeocystaceae;Phaeocystis;	0	0	2	4	0	0	0	1	0	0	13	0	1	0	0	0	0	0	0	0	0	37	0	0	0	0	0	0	0	0	0	0	TCTATCAGGTATTCAGGCACATTCTGGTGGTTCAGTTGACTGTGCTATTTACTCATTACACCTGGCAGGAGTTTCTTCTATTTTAGGTGCTATCAATTTTATTGTAACAATCACAAACATGCGTGCGCCAGGAATGACGGCAAATAGAACGCCATTGTTCGTTTGAGCAGTTTTTATTACAGCTTTTTTACTATTATTGTCACTTCCTGTATTAGCTGGTGCTATTACAATGTTATTAACAGATAGAAATTTTAATACATCTTTCTTTGACCCCGCTGGTGGTGGTGATCCTGTATTATATCAGCACTTATTC
506	993	BOLD;Chordata;74.91	0	0	0	0	0	0	3	98	1	0	78	0	0	0	0	0	0	0	0	0	3	0	0	0	0	0	0	0	0	0	0	0	TTTATCACTTCAGGGCGGTAACTCAATGCCGTTTGTAATTTTTGCAATTCATCTACTAGGAATTTCGTCAATTCTTGGTGCAATAAACGTAATAGCTACTATTTTAAATATGAGAGCGCCTGGAATGACGTTAATGAAGATGCCTATGTTTGTATGGACGTGGTTAATCACGGCTTTTCTGCTTATCGCAGCTATGCCAGTTTTAGCAGGTGCAATCACTATGCTATTAACCGATAGATTCTTTGGGACCAGTTTCTTCACTGCTTCTGGCGGAGGCGACCCAGTGATGTTTCAACATATCTTC
507	995	BOLD;Rhodophyta;Bangiophyceae;85.29	0	16	5	0	0	0	0	0	0	0	1	0	48	0	0	0	6	0	0	0	0	2	0	0	0	0	2	2	0	0	0	3	ATTATCTAGTGTGCAAGCTCATTCAGGACCTTCTGTAGATTTAGCTATTTTTAGTTTACATTTAGCAGGTGCTTCTTCTATTTTAGGTGCAATTAATTTTATTGTAACTATTTTCAATATGCGTTGTCCAGGTATGTTTATGCATAAATTACCTTTATACGCTTGAGCTGTTTTAATTACTGCTGTATTATTATTATTATCATTACCAGTATTAGCAGGTGCTATTACTATGTTATTAACTGATAGAAATTTTAATACTACTTTCTTTGATCCAGCTGGGGGTGGAGATCCTATATTATATCAACATTTATTC
508	998	NCBI;cellular organisms;Eukaryota;Opisthokonta;Metazoa;Eumetazoa;Cnidaria;Hydrozoa;Hydroidolina;Leptothecata;Campanulariidae;Bonneviella;unclassified Bonneviella;Bonneviella sp. 2 819AS;	0	0	0	0	18	0	0	15	139	0	36	0	0	0	0	0	0	0	0	0	0	0	0	0	0	0	0	0	0	0	0	0	TTTATCAAGTGCCTTAGGACACGCAGGACCAGCTGTAGATATGGCTATCTTAAGCTTGCATCTTGCCGGAGCTTCCTCAATTCTGGGAGCAATAAATTTTATAACTACTATTTTTAACATGAGAACACCTGGCATGACATTACACAGGATGCCTCTTTTTGTTTGGTCCATTCTAGTTACAGTATTTTTATTAGTTCTTTCGTTGCCAGTTCTTGCAGGGGCAATCACCATGTTGCTAACAGATAGAAATTTTGGTACCGCTTTTTTTGCTCCAGAAGCAGGCGGAGACCCTATACTTTTTCAGCATTTATTT
509	999	NCBI;cellular organisms;Eukaryota;Sar;Stramenopiles;Ochrophyta;Bacillariophyta;Coscinodiscophyceae;Thalassiosirophycidae;Stephanodiscales;Stephanodiscaceae;Cyclotella;unclassified Cyclotella;Cyclotella sp. MBTD-CMFRI-S052;	3	0	40	7	9	0	0	2	0	0	5	0	0	0	3	0	21	0	11	0	3	3	9	1	0	4	11	0	0	1	0	11	TTTGTCAAGCGTTGCAGCTCACTCAGGTCCTTCAGTTGATCTAGCAATTTTCAGTCTACACTTGGCTGGTGCTTCTTCAATTTTGGGTGCTATTAACTTTATTACTACTATTCTTAATATGCGTGCACCAGGTATGACAATGCACCGTCTACCACTATTTTGTTGGGCTGTACTAATTACAGCTGTTCTACTTTTGCTTTCTCTACCAGTTTTGGCTGGAGCGATTACAATGCTACTAACAGATCGTAACTTTAATACTACATTCTTTGACCCTGCTGGGGGAGGAGATCCTGTACTTTATCAACACCTTTTC
510	1000	NCBI;cellular organisms;Eukaryota;Opisthokonta;Metazoa;Eumetazoa;Bilateria;Protostomia;Ecdysozoa;Panarthropoda;Arthropoda;Mandibulata;Pancrustacea;Crustacea;Malacostraca;Eumalacostraca;Eucarida;Decapoda;Pleocyemata;	2	8	18	6	3	0	1	7	1	0	7	0	27	0	1	0	19	0	13	1	0	95	0	1	0	0	0	0	3	0	0	2	ACTTTCAAATAAACTTGGACACGCAGGACCTTCTGTTGATATGGCAATTTTTGCTCTTCATTTAGCGGGTGCCTCCTCAATTTTAGGTGCAGTTAATTTTATAACAACAATACTTAATATGAGAACACCTGGAATGACACTTCATAAGATGCCTCTATTTGTATGGGCTATGTTAATTACTGCATTCTTACTTTTGTTAGCTGTTCCTGTTTTAGCTGGAGCAATTACGATGCTTCTAACTGATAGAAATTTTGGCACAACATTTTTCAACCCTGCAGGTGGTGGAGATCCAGTTCTTTTCCAACACTTATTT
511	1002	NCBI;cellular organisms;Eukaryota;Opisthokonta;Metazoa;	3	3	3	3	0	0	0	5	0	0	2	0	4	0	0	0	0	0	2	0	16	9	12	0	0	0	2	0	0	0	0	2	TTTATCATCTAAAGCTGGTCAACCAGGACCAGCAATGGATCTTGCAATTTTAAGTTTACACTTAGCTGGTGCCTCTTCAATTTTAGGTGCAGTAAATTTTATTACAACAATTTTGAATATGAGAACACCAGGTATGACATTACATAAAATGCCTTTATTTGCTTGGTCAATTTTAGTAACTGCATTTTTATTATTACTTTCTCTACCTGTATTAGCGGGAGCAATTACAATGTTGCTTACAGATAGAAATTTTGGGACCGCCTTCTTTGAAGCTCAAACTGGAGGTGATCCAGTTTTATTTCAACATTTATTC
512	1005	NCBI;cellular organisms;Eukaryota;Sar;Alveolata;Dinophyceae;Peridiniales;Heterocapsaceae;Heterocapsa;Heterocapsa triquetra;	4	0	0	1	0	0	15	7	52	1	145	3	0	1	0	0	0	0	0	0	0	0	0	0	0	6	0	0	0	0	0	0	TCTTTCTACTTCTTTCATGTCTCTATCTCCTTCTTCTATCTACTTCCTAATTGTTGGTCTAGCAATTTCTGGTATTTCTTCTGCTCTAACTTCTCTAAACTTCCTTCTAACTATTACTAACATGCGTGTTTACTCTATGTCCCTAAAGCTTATGCCTCTTTTCAATTGGTCTATTCTAATTACTTCTAATCTTCTTCTAATGTGTCTTCCAATTCTTACTGGTGCTCTTATTATGGTTCTTTCTGATCTTAATCTTAATACTCTATTCTATGATCCTGTCTTCGGTGGTGACCCTGTTCTATATCAGCATCTATTC
513	1006	NCBI;cellular organisms;Eukaryota;Sar;Stramenopiles;Ochrophyta;Bacillariophyta;Bacillariophyceae;Bacillariophycidae;Bacillariales;Bacillariaceae;Pseudo-nitzschia;Pseudo-nitzschia sabit;	3	23	4	0	1	0	0	0	0	0	0	0	0	0	0	0	7	0	10	0	0	0	2	0	0	0	0	0	0	0	0	0	TCTTTCGAGTGTTTTATCGCATTCGGGAGGTTCAGTTGATCTAGCGATTTTTAGCCTTCACTTATCAGGAGCAGCTTCGATTCTAGGTGCAATTAACTTTATTTGTACAATTGTAAATATGAGAACTGAAAGTTTACCATTTCACAAACTTCCTCTTTTTGTTTGGTCTGTTTTCATTACTGCAATTTTACTATTGTTATCATTGCCTGTTCTAGCAGGAGCAATTACAATGTTATTAACCGATAGAAATTTCAATACTACTTTTTTTGATCCAGCAGGTGGAGGAGATCCTGTACTTTTCCAACATTTATTC
514	1007	NCBI;cellular organisms;Eukaryota;Sar;Alveolata;Dinophyceae;	7	0	0	7	66	0	10	11	144	35	24	21	1	0	16	0	13	0	4	0	47	2	1	17	0	11	17	0	0	0	0	0	ATTAAGCACTTCTTTCATGAGTTTATCACCTTCAAGTACAGCATTTATAGTCTTTGGATTATTAATCTCAGGTATATCCTCATCTTTTACATCTTTTAATTTTTGGATTACAATTTTAAATATGAGATCTTATTATCTGACATTAAAGACTATACCCTTATTCCCTTGGGCTCTCTTAATAACAGGAGGAATGCTTTTATTAACATTACCAATCTTATCAGGAGCTCTTTTAATGGTCTTGGCTGATCTTCATTCTAATACACTTTTCTTTGATCCAATCTTTGGAGGAGATCCTATATTCTATCAACATTTATTT
515	1010	NCBI;cellular organisms;Eukaryota;Opisthokonta;Metazoa;Eumetazoa;	0	0	0	0	0	0	0	0	0	0	0	0	0	0	0	1	46	0	53	0	0	0	11	4	0	0	0	0	0	0	0	0	ATTAAGTAGTATCATTGCTCACTCTGGTCCTGCTGTAGATATGGGTATTTTTAGTTTACACTTAGCTGGTGCTTCTTCAATTATGGGTGCTATTAATTTCATTACTACAATTATTAATATGCGTGGTCCAGGAATGAGTTGGCACAGAGTTCCTTTATTTGTTTGGTCGGTTCTTATTACAGCGATTTTACTTTTATTATCGTTACCTGTATTAGCAGGAGCTATTACAATGTTATTAACAGACCGTAACTTTAACACAACTTTCTTTGACCCAGCTGGTGGTGGAGATCCTATTTTATTCCAACACTTATTC
516	1011	NCBI;cellular organisms;Eukaryota;Sar;Alveolata;Dinophyceae;	0	0	0	0	0	0	4	11	0	1	1	9	0	0	5	0	0	0	0	0	58	0	0	0	0	0	0	0	0	0	0	0	TTTAAGTACTTCATTTATGAGTTTATCACCTTCAAGTACAGGAAATCTTATATTTGGATTATTAATCTCTGGTATATCTTCTTGTCTTACTTCTCTTAACTTTCTCATTACAATTCTTAATCTGAGATCTTATTATCTGACATTAAAAACTATGCCATTATTTTCATGGGCACTCTTAATTACAGCTGGAATGCTACTTTTAACTCTCCCAATCTTAACTGGAGCTCTTGTAATGGTTCTAGCTGATCTTCATTCCAGCGACCGTTGGTTCTCTGCTTTTAAG
517	1012	NCBI;cellular organisms;Eukaryota;Opisthokonta;Metazoa;Eumetazoa;Bilateria;Protostomia;Ecdysozoa;Panarthropoda;Arthropoda;Mandibulata;Pancrustacea;Crustacea;Multicrustacea;Hexanauplia;Copepoda;Neocopepoda;Podoplea;Poecilostomatoida;Oncaeidae;Oncaea;Oncaea scottodicarloi;	0	0	0	1	115	0	0	0	0	0	0	0	0	0	25	0	0	0	0	0	0	0	0	0	0	0	0	0	0	0	0	0	TTTAAGGAGGAATATTGCACACTCGGGGGCTTCTGTGGATTTTGCTATTTTTGCTCTTCATTTAGCCGGGGTTTCTTCATTGCTAGGGGCAGTTAATTTTATTACTACTTTTTCTAATTTACGTGGGTTAGGAATGCTTTTAGAGCGGGTACCTTTATTTGGGTGAGCTGTTTTAATTACTACAATTTTATTACTTTTATCTCTACCCGTGTTGGCAGGAGCTATTACAATACTTTTAACAGATCGTAATTTGAATACAGCTTTTTACGATTCAAATGGAGGAGGGGACCCAATTTTATATCAACACTTGTTT
518	1013	NCBI;cellular organisms;Eukaryota;Sar;Stramenopiles;Ochrophyta;PX clade;Phaeophyceae;Ectocarpales;Scytosiphonaceae;Petalonia;	0	110	0	1	0	0	0	0	0	0	3	1	10	0	0	0	0	0	0	0	0	19	0	0	0	0	0	0	0	0	0	0	ATTAAGTTCAGTTCAGGCGCACTCTGGTCCATCGGTTGATTTAGCGATTTTTAGCTTACACGTAAGTGGGGCATCTTCAATTTTAGGTGCAATTAACTTTATTACCACTATTTTCAACATGCGTGCTCCAGGTATGACTATGCACCGTTTACCGTTAATGGTGTGGGCTGTTCTAATTACTGCTTTCTTACTACTGTTATCACTTCCAGTTCTTGCTGGAGCAATTACTATGTTATTAACAGACCGTAATTTCAACACTACTTTCTTTGATCCTGCAGGTGGTGGTGATCCAGTACTGTATCAACACTTGTTC
519	1017	NCBI;cellular organisms;Eukaryota;Viridiplantae;Chlorophyta;core chlorophytes;Trebouxiophyceae;unclassified Trebouxiophyceae;Trebouxiophyceae sp. MX-AZ01;	0	0	9	11	15	0	2	14	0	0	13	1	0	0	1	46	20	0	0	0	0	4	0	6	0	0	0	0	0	0	0	22	TTTATCGAACTCAGACTTTCACGGTGGTCCGGCTGTGGATTTGGCAATTCTTAGTCTCCATCTAGCGGGAGCTTCTTCGATATTGGGCGCCATTAATTTTATAACGACCATCATTAACATGCGTGCCCCGGGCATGACTTTTCATAAAATGCCCTTGTTTATTTGGGCTGCCTTGATTACCGCTTTTCTGCTTTTACTGGCTATTCCGGTTTTGGCGGGTGCCCTCACCATGCTGCTTACAGATCGCAACTTCGGAACTGCTTTTTTCGAGCCAGCTGGCGGTGGAGATCCCATTTTCTGGCAGCATCTATTC
520	1022	NCBI;cellular organisms;Eukaryota;Opisthokonta;Metazoa;Eumetazoa;Bilateria;Deuterostomia;Echinodermata;Eleutherozoa;Asterozoa;Ophiuroidea;Myophiuroidea;Metophiurida;Ophintegrida;Amphilepidida;Ophiurina;Chilophiurina;Ophiuridae;Ophiurinae;Ophiura;	0	0	0	0	0	0	0	0	0	0	0	0	0	0	0	21	0	0	0	0	0	0	6	0	0	0	0	0	1	0	0	130	GTTGTCCAGTGCCGAATTTCATGGCGGCGCCGCCGTGGACCTTGCAATTTTGAGTCTTCATTTGGCCGGAGCGTCCTCTATTTTGGGTGCTATTAACTTTATAACTACAATTATTAACATGCGCGCTCCCGGTATGACTTTTCACAAAATGCCGCTCTTTATTTGGGCGGCTTTGATTACGGCGTTTTTGTTGTTACTGGCAATTCCGGTTTTGGCCGGAGCTCTGACTATGATGCTGACAGACCGTAATTTTGGTACGGCGTTTTTTGACCCAGCTGGCGGTGGGGACCCAATATTCTGGCAACACCTATTT
521	1025	NCBI;cellular organisms;Eukaryota;Opisthokonta;Metazoa;Eumetazoa;Bilateria;Protostomia;Spiralia;Gnathifera <animals>;Chaetognatha;Sagittoidea;Aphragmophora;Ctenodontina;Sagittidae;Sagitta;Sagitta helenae;	0	0	0	0	0	1	1	1	2	1	0	0	462	0	0	0	0	0	0	0	1	0	0	0	0	0	0	0	0	0	0	3	CCTATCAACACTAGGGCACCCCGGTGGTGCCGTGGACTTAGGGATTTTTTCCTTACACTTGGCCGGTGTTAGAAGGATTTTAGGTAGAGCTAACTTTATTACTACTATCATAAATATGCGAGGAGAAGGTATAACTATAGAACTTATACCCCTCTTTGTGTGATCAGTACTCCTGACAGCTATCCTTTTACTCCTTTCATTGCCTGTCCTGGCAGGGGCGATCACTATACTTTTAACTGACCGGAACTTCAATACCTCCTTCTTTGATCCTGCGGGAGGGGGAGACCCAATCCTCTATCAGCACCTATTT
522	1026	NCBI;cellular organisms;Eukaryota;Amoebozoa;	0	0	0	0	0	0	2	0	0	0	0	0	0	0	0	0	0	0	0	0	0	0	0	0	0	0	0	0	0	0	0	0	ATTAAGTAGTATTTTAGCACATTCAGGCCCTTCAGTAGATTTAGCAATTTTTAGTTTACATTTAGCAGGGGCGTCTTCTATTTTAGGTTCTGTTAATTTTATAGTAACTATTTTTAACATGAGAGCTATCGGTATGTCTTTACATAGAATGCCATTATTTGTATGGTCAGTATTAATTACAACTTTTTTATTAGTAGTTTCATTACCTGTATTAGCTGGAGCTATTACTATGTTATTAACTGATAGAAATTTTAATACAACTTTTTTTGATCCTGCTGGAGGTGGAGATCCTGTATTATACCAACATTTATTT
523	1030	NCBI;cellular organisms;Eukaryota;Opisthokonta;Metazoa;Eumetazoa;Bilateria;Protostomia;Ecdysozoa;Panarthropoda;Arthropoda;	0	0	0	0	0	0	0	0	0	0	106	0	0	0	0	1	0	0	0	0	0	0	0	0	0	0	0	0	0	0	0	0	ACTTAGCTCAATAGGACATCCTACAATGGCCGTTGATATAGCAATTTTCAGTCTTCATATTGCTGGAATTTCTTCTATGATAGCAGCAATTAACATGATTGTTACTATTTTGAATATGCGCAAATCTTCAATAACTTTATTTAATATGCCCTTATTTGTTTGGTCAATATTGATTACTGCATTTTTATTAATCTTGGCATTGCCAGTCCTGGCAGGAGGTATTACGATGTTATTATCTGATAGAAATTTTGGCACTAATTTTTTTAACCCTGAAGGAGGTGGGGATCCTGTATTATTTCAACATTTATTT
524	1031	NCBI;cellular organisms;Eukaryota;Opisthokonta;Metazoa;Eumetazoa;Cnidaria;Hydrozoa;Hydroidolina;Leptothecata;Aequoreidae;Aequorea;unclassified Aequorea;Aequorea sp. USNM IZ 1448486;	0	0	0	0	0	0	0	0	0	0	110	0	0	0	0	0	0	0	0	0	0	0	0	0	0	0	0	0	0	0	0	0	ATTATCAGCTATAATAGCACACTCAGGAGGAGCCGTAGACTTAGCTATTTTCAGCTTGCACTTATCAGGTGCAGCTTCAATACTAGGGGCAATAAACTTTATATGCACCATTACAAATATGCGATCAAAAAGCTTACCTTTCCATAATCTGCCCCTTTTTGTGTGGGCTATTTTTATTACAGCATTTTTACTTTTACTTTCTTTACCAGTTTTAGCTGGAGCAATCACTATGCTGTTAACTGACAGAAACTTTAACACCACTTTTTTTGACCCTTCTGGAGGAGGGGATCCTGTGTTATACCAGCACTTATTC
525	1032	NCBI;cellular organisms;Eukaryota;Rhodophyta;Compsopogonophyceae;Erythropeltidales;Erythrotrichiaceae;Sahlingia;Sahlingia subintegra;	0	0	3	0	0	0	0	0	0	0	1	0	0	0	0	0	2	0	0	0	0	0	7	7	1	0	68	0	0	0	0	0	TTTAAGCAACCTGGTTGGACATCCGGGTGCTGCAGTCGATATGGCCATATTTAGTTTGCATCTTGCGGGTATGTCCTCCATTCTGGGTTCTATTAACATGATAGTTACCATTTTCAACATGCGAGCTCCTGGAATGGGCTTATTCAAAATGCCTCTTTTTGTTTGGTCAATTTTAATCACAGCGTTTCTACTAATATTAGCACTTCCGGTTCTTGCCGGTGCAATTACCATGCTACTTACTGACCGTAATTTCGGCACCAGCTTCTTTTCACCTGAAGGTGGAGGTGATCCGGTATTATTTCAGCATCTGTTC
526	1035	NCBI;cellular organisms;Eukaryota;Sar;Stramenopiles;Ochrophyta;	0	0	0	0	0	0	0	0	0	0	0	0	0	0	0	0	0	1	0	0	1	0	0	0	0	0	0	0	114	0	0	0	ATTAAGTAGTGTTCAAGCGCATTCAGGACCTTCGGTAGACTTAGCAATTTTTAGCCTTCATTTGGCTGGAGCAGCTTCAATTTTAGGTGCTATTAATTTCATTACTACAATTTTTAATATGAGAGCACCTGGAATGCATATGCATAGATTACCATTATATGTTTGGTCAATTTTAATAACTTCATTTTTATTGTTGTTATCTTTACCTGTTTTAGGGGGTGCGATTACAATGTTATTAACTGACAGAAATTTTAATACATCTTTTTTTGATCCTGCTGGTGGTGGGGATCCAATTTTATATCAACATTTATTT
527	1037	NCBI;cellular organisms;Eukaryota;Sar;Stramenopiles;Oomycota;	1	0	3	0	3	0	0	6	0	0	0	0	0	0	0	2	18	0	33	0	0	0	24	5	0	0	5	0	0	0	0	2	ATTAGCGAGTATACAAGCACACTCAGGGCCTTCTATTGATTTAGCAATTTTCAGTCTTCACTTAGCTGGTGCTTCATCAATTTTAGGAGCTATTAACTTCATTACTACTATCGTAAACATGAGAGCTCCTGGTCTAACATTCCATAGATTACCTTTATTCGTATGGGCTGTATTAATTACTGCAATTCTTCTATTATTATCACTACCTGTATTAGCTGGTGCAATTACTATGCTATTAACAGATAGAAACTTCAATACAACTTTCTTTGATCCAGCAGGTGGAGGTGACCCTGTGTTATACCAACACTTATTC
528	1038	NCBI;cellular organisms;Eukaryota;Rhodophyta;Florideophyceae;Rhodymeniophycidae;	0	0	0	0	0	0	0	0	0	0	0	0	0	0	0	0	47	0	1	0	0	0	0	0	0	0	0	0	0	0	0	0	TTTAGCTAGTATTCAATTTCATTCAGGAGGTGCAGTTGATTGTGCGATTTTTGCACTTCACGTTGCAGGAGCTTCTTCAATTTTAGGAGCCGTTAACTTCATTACAACGGTTATGAACATGCGAGCCCCTGGAATTAGTTTCCACCGAATGCCTCTTTTTGTTTGAAGTATCCTTGTTACAGTTGTTCTTCTTTTATTAGCGGTTCCTGTATTAGCAGGTGCGATTACTATGCTTTTAACAGATCGAAACTTCAACACAACTTTCTTTGACCCTGCTGGGGGAGGAGATCCTGTTCTTTATCAGCATCTTTTC
529	1040	NCBI;cellular organisms;Eukaryota;Sar;Stramenopiles;Oomycota;	0	8	0	3	0	0	0	0	0	0	1	0	0	0	0	0	4	0	0	0	0	74	0	1	0	0	0	0	0	0	0	0	TTTATCTAGTGTACAAGCGCACTCAGGTCCTTCTGTAGACCTAGCTATTTTTAGTCTTCACTTAGCAGGTGCGTCTTCTATTTTAGGTGCAATTAATTTTATTACAACTATCTTTAATATGCGAGCTCCTGGAATGAAGTTACATAATATGCCTTTAATGGTATGGGCTGTATTAGTTACAGCTTTTCTTTTATTACTATCTTTACCAGTATTAGCAGGTGCTATTACTATGTTATTAACAGATAGAAATTTTAACACAACATTTTTTGATCCTGCAGGAGGTGGAGATCCAGTATTATATCAACATTTATTC
530	1041	BOLD;Rhodophyta;82.82	0	39	0	0	0	0	0	0	0	0	0	0	0	0	0	0	0	0	0	0	0	3	0	0	0	0	0	0	0	0	0	0	TTTATCTAGTGGTAGCTCTCATTCAGGAGGTGCTGTAGATCTTGCTATATTTAGTCTGCATTTATCTGGAGCTTCATCTATTTTAGGTGCCATTAATTTTATTTGTACTATATTTAACATGAGAGTCAAAAGTTTGTCTTTCCATAAAATGCCTTTATTTGTATGGGCTGTTTTAATAACTGCTTTCTTGTTGTTGTTATCATTGCCTGTGCTTGCAGGAGCAATTACTATGTTGTTAACTGATAGAAATTTCAACACCACATTCTTTGATCCTGCTGGAGGCGGAGATCCAGTTCTTTATCAGCATTTATTT
531	1043	NCBI;cellular organisms;Eukaryota;Sar;Stramenopiles;Oomycota;	0	0	0	0	100	0	0	6	0	0	0	0	0	0	0	0	0	0	0	0	0	0	0	0	0	0	0	0	0	0	0	0	TTTATCAAGTGTTCAAGCTCATTCAGGTCCTTCTGTGGATTTAGCTATTTTTAGTTTACATTTAGCAGGTATTTCATCTTTACTTGGAGCTATTAATTTTATTACTACTATATGTAATAGCGTTGTCCTGGATTAACTTTTCATAAATTACCTTTATTTATTTGGGCTATTCTTATTACAGCTGTTTTATTATTATTAACTCTACCAGTATTAGCAGGAGCTATTACTATGTTATTAACTGATAGAAATTTAAATACATCTTTTTTTGATCCAGCAGGAGGAGGAGATCCCGTTTTATATCAACATTTATTT
532	1045	NCBI;cellular organisms;Eukaryota;Sar;Stramenopiles;Ochrophyta;Bacillariophyta;Coscinodiscophyceae;Chaetocerotophycidae;Chaetocerotales;Chaetocerotaceae;Chaetoceros;unclassified Chaetoceros;	0	5	41	0	0	0	0	0	0	0	0	0	0	0	0	0	5	0	40	0	0	0	0	0	0	0	0	0	0	0	0	0	GTTATCAAGCGGTACTTCGCACTCTGGAGGTGCTGTTGACTTAGCTATTTTTAGCTTACATTTATCTGGGGCATCGTCGATATTAGGGGCAATTAACTTTATTTGCACTATTTTTAACATGCGAGTTAAAAGTTTATCGTTTCATAAACTACCTTTATTCGTTTGGTCAGTTCTGATAACAGCTTTCTTATTGCTTTTATCGTTACCAGTTTTAGCTGGAGCAATAACAATGCTGCTGACGGATAGAAACTTTAACACTACATTCTTTGATCCTGCAGGTGGTGGCGACCCAGTTTTATACCAACACCTATTC
533	1046	NCBI;cellular organisms;Eukaryota;Opisthokonta;Metazoa;Eumetazoa;Bilateria;Deuterostomia;Echinodermata;Pelmatozoa;Crinoidea;Articulata;Comatulida;Antedonidae;Promachocrinus;Promachocrinus kerguelensis;	102	0	0	4	0	0	0	0	0	0	0	0	0	0	0	0	0	0	0	0	0	0	0	0	0	0	0	0	0	0	0	0	TCTAAGTCACATAACTGCCCATTCTGGCCCTTCCGTTGATCTCGCAATCTTCAGCCTCCACCTTGCCGGTGTCTCATCACTACTTGGTGCCATAAACTTTATCTCCACAATCATTAACATGAGGGCTCCGGGCATAACATGGCATCGCCTGCCTCTTTTTGTCTGGTCTGTTTTTGTTACTGCATTTCTTCTTCTCCTTTCCCTTCCTGTCCTAGCCGGTGCTATAACTATGCTTCTTACCGACAGGAATTTCAATACTACCTTTTATGATCCTATTGGTGGTGGTGATCCCATACTTTACCAGCACCTTTTC
534	1047	NCBI;cellular organisms;Eukaryota;Opisthokonta;Metazoa;Eumetazoa;Bilateria;Protostomia;Spiralia;Lophotrochozoa;Mollusca;Bivalvia;Autobranchia;Pteriomorphia;Pterioida;Pterioidea;Pteriidae;Pinctada;	0	0	0	0	0	0	0	0	0	0	0	0	0	0	0	0	0	0	43	0	0	0	0	0	0	0	0	0	0	0	0	0	TCTATCTACCTATTTGTATATAGGTAAAAGTGTGGATTTGACTATTTTTTCTCTTCATTTGGCTGGGATTGGTTCTATTTTTGGTTCTATTAATTTTATTGTAACGGTTCGGGCACTTAAGCTGACGGATCTTCACTTATTATCGATGTTTCCAATTAGGATGTTAGTCACTGGGCATTTGTTGGTGGTTGCTTTACCTGTTTTGGCGGGGGGGTTGACTATGTTATTGACTGATCGACATTTTAATACAAGCTTTTTTTATCCTGTTGGTGGGGGCGATCCAGTTTTGTTCCAGCATTTGTTT
535	1051	BOLD;Mollusca;83.13	0	0	0	0	30	0	0	0	0	0	0	0	0	0	1	0	0	0	0	0	0	0	0	0	0	0	0	0	0	0	0	0	TTTATCTAGTGTTGCAGCGCATTCTGGACCTTCTGTTGATTTAGCTATTTTCAGTTTACACTTAGCTGGAGCTTCATCAATTTTAGGGGCTGTTAACTTTATTACTACAATTATTAATATGAGACCACCTGGATTAACAATGCACGAATTACCATTATTCGTTTGGGCTGTTTTAATTACAGCGGTATTGTTATTATTATCATTACCTGTTTTAGCAGGAGCTATTACAATGTTACTAACAGATCGTAACTTTAATACAACATTCTTTGATCCAGCAGGAGGAGGAGATCCTATCCTATATCAACACCTGTTC
536	1053	NCBI;cellular organisms;Eukaryota;Opisthokonta;Metazoa;Eumetazoa;Bilateria;Protostomia;Ecdysozoa;Panarthropoda;Arthropoda;Mandibulata;Pancrustacea;Crustacea;Multicrustacea;Hexanauplia;Copepoda;Neocopepoda;	0	0	0	0	0	164	0	0	0	1	0	0	0	0	0	0	0	0	0	0	0	0	0	0	0	0	0	0	0	0	0	0	TTAGCAAGGAATATTGCCCATGCCGGGAGCTCAGTTGATTTTGCAATTTTTTCTCTTCATCTGGCAGGAATCTCCTCTATTTTAGGGGCTATTAATTTTATTAGAACATTGGCCAACTTGCGAGTTTTTGGGATGCTCTTAGAGCAAATACCTCTTTTTGCCTGAGCAGTTTTGGTGACTGTTATTTTACTGCTCCTTTCTTTACCTGTATTGGCAGGGGCTATTACTATACTTTTAACAGATCATGGGGATCCTATTCTTTATCAACATCTCTTC
537	1055	NCBI;cellular organisms;Eukaryota;Sar;Stramenopiles;Ochrophyta;Bacillariophyta;	0	2	10	0	0	0	0	0	0	0	0	0	0	0	0	0	24	0	3	0	0	0	0	0	0	0	0	0	0	0	0	0	ATTATCTAGTGGCAGCTCTCACTCAGGAGGTGCTGTTGACTTAGCTATTTTCAGTTTACATTTATCTGGAGCATCTTCTATATTAGGAGCTATCAATTTTATTTGTACCATTTTTAATATGAGAGTTAAAAGTTTATCATTTCATAAATTACCTTTATTTGTTTGGGCTGTTTTAATTACGGCTTTTTTACTTTTATTATCTTTACCTGTATTAGCTGGAGCAATTACAATGTTACTTACTGACAGAAATTTTAATACTACGTTTTTCGATCCTGCGGGAGGTGGAGACCCTGTATTGTACCAACACTTATTT
538	1056	NCBI;cellular organisms;Eukaryota;Sar;Stramenopiles;Ochrophyta;Bacillariophyta;	0	0	0	0	0	0	0	0	0	0	0	0	0	0	0	0	1	0	0	0	0	0	0	0	0	1	0	0	0	0	0	0	TTTATCAGGTGGGTTAGCTCATTCAGGTAGTTCTGTTGATTTAGCTATTTTTAGCTTACATATTGCTGGAGCTTCATCAATTTTGGGGGCTATAAATTTTATATGTACCATAGTAAATATGAGAGTTAAAAGTTTATCCTTTCATAGGTTACCTTTGTTTGTTTGGTCCGTTCTAATCACGGCTGTTTTATTGCTGTTATCTTTACCGGTTTTAGCAGGTGCTATTACAATGTTATTAACGGATAGGAATTTCAACACTACTTTTTTTGATCCAGCAGGTGGTGGTGATCCAGTTTTATATCAGCATTTGTTT
539	1063	NCBI;cellular organisms;Eukaryota;Opisthokonta;Metazoa;Eumetazoa;Bilateria;Protostomia;Spiralia;Lophotrochozoa;	0	0	0	0	0	0	0	0	0	0	0	0	0	0	0	0	0	0	0	0	0	0	0	111	0	0	0	0	0	0	0	0	TTTGTCTAGAAATGTGGCTCATGCTGGGCCGTCGGTAGATTTTGCTATTTTTTCTTTGCATTTAGCTGGGATTTCTTCTATTTTAGCGTCTTTGAATTTTATTACTACTGCTATGAATATGCGTTCTGTAGGTATACGTCTTGAACGTGTTCCCTTATTTGTGTGATCTGTTGGGATTACTGCTTTATTATTGTTATTGTCTTTACCTGTTTTAGCTGGAGCTATTACTATATTATTGACTGATCGTAATTTGAATACTTCTTTTTTTGATCCTGCGGGGGGAGGAGATCCTATTTTGTATCAACACTTGTTT
540	1065	NCBI;cellular organisms;Eukaryota;Haptista;Haptophyta;Prymnesiophyceae;Phaeocystales;Phaeocystaceae;Phaeocystis;Phaeocystis globosa;	6	3	0	1	0	0	0	1	10	0	2	1	0	0	0	0	8	0	0	0	0	17	5	0	0	0	0	0	0	0	0	0	TTTATCGGGAATTTTAGCCCATTCTGGAGGTGCTGTTGATTTAGCTATTTTTAGCTTACATCTAGCTGGTATCTCTTCAATCTTAGGCGCTATAAATTTTATTGTAACGATATTAAATATGCGTTGTCCTGGAATGACAGCTCATAGAACACCTTTATTTGTTTGAGCTGTTTTTATTACGGCTTTTCTACTTTTATTATCTCTACCTGTTTTAGCAGGTGCCATCACTATGCTACTAACAGATAGGAATTTTAATACTTCTTTTTTCGATCCCAGCGGTGGAGGCGATCCGGTTCTGTACCAACACCTGTTT
541	1066	NCBI;cellular organisms;Eukaryota;Sar;Alveolata;Dinophyceae;	0	0	6	1	4	0	4	9	35	0	58	11	0	2	0	0	3	0	0	5	0	1	0	0	0	9	0	0	0	0	0	0	ATTAAGCACTTCTTTCATGAGTTTATCACCTTCAAGTACAGTTTTCATTATCTTTGGATTATTAATCTCAGGTATATCCTCATGTCTGACATCTCTTAATTTTTGTACAACAATTCTAAATCTGAGATCTTATTATCTGACATTAAAGATTATGCCATTATTTTCATGGGCTCTTTTGATAACAGCAATAATGCTTTTATTAACATTACCAATCTTATCTGGTGCTCTTTTAATGATCTTCACGGATCTTCATTGTAATACACTTTTCTTTGATCCAATTTTTGGAGGAGATCCTATATTGTATCAACACTTATTT
542	1069	NCBI;cellular organisms;Eukaryota;Sar;Stramenopiles;Ochrophyta;Bacillariophyta;	0	26	0	0	0	0	0	0	0	0	0	0	0	0	0	0	0	0	0	0	0	1	0	0	0	0	0	0	0	0	0	0	TCTTTCTAGTGGAAGCTCACATTCAGGAGGCGCAGTAGATTTAGCTATATTTAGTTTGCACTTATCCGGAGCTTCTTCTATATTAGGTGCTATTAATTTTATTTGTACTATATTTAATATGAGAGTAAAAAGTCTATCGTTTCATAAAATGCCTTTGTTTGTTTGGGCTGTTTTAATAACAGCATTTTTATTATTGTTATCTTTGCCTGTGCTAGCGGGAGCTATTACTATGCTGTTAACTGATAGAAACTTTAACACTACTTTTTTCGATCCTGCTGGAGGAGGTGATCCTGTATTATACCAGCATTTATTT
543	1071	BOLD;Cnidaria;78.21	0	0	0	0	0	0	0	0	0	0	0	0	0	0	0	0	0	0	0	0	1	0	20	0	1	0	0	0	153	0	0	1	ACTAAGTGCAAAAATAGGACACCCCGGACATTCGGTTGATTTTTTAATTTTAGGAATTCATATTTTAGGCGCTTCATCGATTTTAGGGGCAATTAATTTTATTACTACAATTTTTAATATGCGTGCTCCTGGAATGACATTACATAAAATGCCTTTATTTGTTTGGGCTATTTTAGTTACAGTTTTTCTATTGCTTTTATCACTTCCTGTGCTTGCCGGAGGGGTTACCATGCTTTTAACGGATAGAAATTTTGGAACAAGCTTTTTTGATCCAGCAGGAGGAGGAGATCCACTTTTATTTCAACATCTTTTC
544	1072	NCBI;cellular organisms;Eukaryota;Sar;Stramenopiles;Ochrophyta;PX clade;Phaeophyceae;	0	16	0	1	0	0	0	1	3	0	6	2	1	0	0	0	1	1	0	0	0	23	0	0	0	0	0	0	0	0	0	0	ACTAAGTTCTATTCAGGCACACTCGGGGCCATCAGTTGATTTAGCTATCTTTAGCTTACACGTAAGTGGTGCGTCATCGATTTTAGGGGCAATTAACTTCATTACTACCATTTTTAACATGCGTGCACCTGGTATGACCATGCACCGTTTACCATTAATGGTTTGGGCTGTGTTAATTACTGCTTTCTTACTGTTGTTATCGTTACCAGTTCTTGCAGGTGCGATTACAATGTTATTAACAGATCGTAATTTCAACACTACTTTCTTTGATCCAGCTGGTGGTGGTGATCCTGTTCTGTACCAACACCTTTTC
545	1074	BOLD;Arthropoda;84.14	0	23	5	0	0	3	0	0	0	0	0	0	3	0	0	1	1	0	1	0	0	28	3	0	0	0	0	0	0	0	0	0	ACTATCATCAAAAACTGGTCAACCAGGTCCAGCTATGGATTTAGCAATTTTAAGTTTACATGTGGCTGGAGCCTCATCTATTTTGGGAGCTATTAATTTTATTACTACAATTTTAAACATGAGAGCACCTGGCATGACTTTGCATAAGATGCCACTATTTTCATGGTCGATACTAGTTACTGCATTTTTACTTTTATTATCATTACCTGTTTTAGCTGGAGCGATAACAATGCTTTTAACCGATAGAAATTTTGGAACTGCTTTCTTTGAGGCTCAAACTGGAGGAGATCCAGTGCTCTTTCAACACTTATTC
546	1075	NCBI;cellular organisms;Eukaryota;Sar;Stramenopiles;Ochrophyta;PX clade;Phaeophyceae;Ectocarpales;	0	0	1	0	0	2	1	0	0	0	1	0	1	0	1	0	34	0	16	0	2	0	21	17	0	0	0	0	0	0	0	0	TTTAAGTAGTGTTCAAGCTCATTCTGGACCTTCTGTAGATTTAGCTATTTTTAGTCTTCATTTATCGGGTGCTTCTTCTATTTTGGGTGCTATTAATTTCATCACGACTATTTTTAATATGCGTGCACCAGGTATGACTTTGCATAGATTACCATTAATGGTTTGGGCTGTTTTAATTACAGCTTTTTTACTTTTATTATCTTTACCTGTGCTTGCTGGAGCTATAACTATGCTTCTTACAGATAGAAATTTCAATACGACCTTCTTTGATCCTGCGGGAGGAGGAGATCCTGTATTATACCAGCATTTGTTC
547	1076	BOLD;Cnidaria;83.5	0	0	0	0	0	0	0	0	0	0	0	0	0	0	0	0	0	0	0	0	0	0	0	0	0	0	0	0	0	0	0	107	TTTATCATCAATTCAAGCACACTCAGGTGGTGCTGTAGATATAGCAATATTTAGTTTACACATTGCAGGTGTTTCATCAATATTAGGTGCAATAAACTTTATTACAACAATATTAAATATGAGAGCACCAGGTTTAGCAATGCATAGATTACCATTATATTGTTGGTCAGTATTAGTAACAGCAGTATTATTATTATTATCATTACCAGTATTTGCTGGAGCAATAACAATGTTATTAACTGATAGAAATTTTAATACTACATTCTTTGATCCAGCAGGTGGTGGTGATCCAGTATTATATCAACATTTATTT
548	1078	NCBI;cellular organisms;Eukaryota;Sar;Stramenopiles;Ochrophyta;Bacillariophyta;Mediophyceae;Lithodesmiophycidae;Lithodesmiales;Lithodesmiaceae;Lithodesmium;Lithodesmium undulatum;	0	0	0	0	0	0	0	0	0	0	0	0	0	0	0	0	3	0	0	0	0	0	0	0	0	0	0	0	0	0	0	0	TTTATCAAGTGCAACAGCTCACTCTGGAGGATCGGTTGATTTAGCTATTTTTAGTTTACACCTTTCTGGTGCATCGTCAATTTTAGGTGCTATTAATTTTATTTGTACTATTTTTAATATGAGAGTAAAAAGTTTATCTTTTCATAATTTACCTTTATTTGTTTGGTCTGTTTTAATTACAGCGTTTTTGTTATTGTTATCTTTACCTGTATTAGCAGGTGCTATAACAATGTTATTAACTGATAGAAATTTTAACACAACATTTTTTGATCCAGCTGGCGGCGGAGACCCTGTTTTATACCAACATTTATTT
549	1079	NCBI;cellular organisms;Eukaryota;Opisthokonta;Metazoa;Eumetazoa;Bilateria;Protostomia;	0	0	0	0	0	0	0	0	0	0	0	0	1	93	0	0	0	0	0	0	0	0	0	0	0	0	0	0	0	0	0	0	TTTGTCATCAAATTTAGCTCATGCCGGGGGCTCAGTAGATCTTGCAATTTTTTCGCTACATTTAGCCGGAGCCTCTTCTATTTTAGGCGCAATTAATTTTATCTCTACTATCCTCAATATACGATGAGATGGAATGTCTTTAGAGCGAATAACATTATTTGTATGGTCAGTAAAGATTACAGCCATCCTCTTATTATTGTCTTTACCAGTCTTAGCTGGTGCAATTACAATATTATTAACGGATCGAAACTTTAATACTTCTTTTTTTGACCCTGTAGGAGGAGGAGATCCTATCTTATACCAGCATCTTTTC
550	1080	BOLD;Rhodophyta;77.02	0	0	0	0	0	0	0	0	0	0	0	0	0	0	0	17	0	0	0	0	0	0	46	1	0	0	0	0	0	0	0	34	TCTATCTGCTAAATTAGGACATGCAGGGCCTTCTGTTGATATGGCTATTTTCGCTTTACATTTAGCTGGAGCATCATCAATTTTGGGAGCGGTTAATTTTATAACAACAATCCTAAATATGCGTACCCCAGGTATGACTTTACATAAAATGCCATTATTTATATGGTCTATGCTTGTCACAGCCTTTTTGTTATTGTTAGCAGTACCAGTCTTGGCAGGTGCAATAACTATGTTGTTAACTGATAGAAATTTTGGCACCACGTTTTTTAATCCAGCAGGTGGTGGAGATCCATTATTATTTCAACACTTATTT
551	1083	NCBI;cellular organisms;Eukaryota;Rhodophyta;Bangiophyceae;Bangiales;Bangiaceae;Porphyra;Porphyra capensis;	0	0	0	0	0	3	0	0	0	0	0	0	0	0	0	0	4	0	0	0	0	0	46	0	0	0	0	0	38	0	0	0	TCTTTCCAACGCGGATTATCATCCCACCCCGGCCGTTGACTTCGCTATCCTCAGTCTACATTTAGCGGGAGCGTCTTCTATACTTGGTGCTATCAATTTCATAACGACGATTATTAACATGCGTGCGCCGGGTATGACTTTTCATCGCATGCCGTTGTTTATTTGGGCATCCCTGATTACGGCCTTCCTATTGTTGTTAGCGATCCCAGTATTGGCTGGCGCTTTGACAATGCTGCTAACCGACCGCAATTTTGGAACGACATTCTTCGAGGCATCTGGCGGCGGAGACCCTATCTTCTGGCAACATCTCTTT
552	1085	NCBI;cellular organisms;Eukaryota;Opisthokonta;Metazoa;Eumetazoa;Cnidaria;Anthozoa;Hexacorallia;Scleractinia;Fungiina;Siderastreidae;Siderastrea;	1	2	48	0	80	0	3	208	10	1	228	1	0	1	0	17	9	0	10	1	0	94	15	4	0	1	1	0	16	0	0	13	TCTTTCAAGCTCGGCAGGTTCTCCAGGCATGGGTATGGACCTTGCAATATTTTCTCTACATTTAGCGGGAGCATCTTCAATATTAGGTGCAGCAAACTTTATAACAACGATATTTAACATGAGGGCACCTGGAATGACACTTCACAAAATGCCATTATTTGTGTGGTCTATGCTAGTTACAGTGTTTTTGTTGTTGTTAGCTATACCTGTGCTAGCTGGTGCAATAACGATGCTACTCACTGATAGAAATTTTGGAACAAGTTTTTTTATTCCTGAAGGTGGTGGTGATCCTATTCTATTTTTGCATCTATTT
553	1087	NCBI;cellular organisms;Eukaryota;Sar;Stramenopiles;Ochrophyta;Synurophyceae;Ochromonadales;Ochromonadaceae;Poterioochromonas;Poterioochromonas malhamensis;	0	0	1	0	0	0	7	0	0	17	0	0	0	0	3	6	0	0	0	0	38	0	0	0	0	1	0	0	0	0	0	15	TTTATCTAGTATTCAAGCTCATTCAGGACCTTCTATTGATTTAGCTATCTTCAGCTTACATTTATCTGGAGCAGCTTCTATTTTAGGTTCTATAAATTTTATTACTACTATTTTTAATATGAGAGCGCCTGGTATGTTAATGCATAGATTACCTTTATATGTATGGTCTGTATTAGTAACATCTTTTTTATTAGTACTTTCATTACCTGTATTAGGGGGTGGAATTACCATGTTATTAACAGACAGAAACTTCAATACAACTTTCTTTGACCCTTGTGGAGGAGGAGACCCAATACTATATCAACATTTATTC
554	1088	NCBI;cellular organisms;Eukaryota;Opisthokonta;Metazoa;Eumetazoa;Bilateria;	0	9	3	3	12	0	0	0	0	0	2	0	0	0	0	0	15	0	8	0	0	2	0	3	0	0	0	0	0	0	0	0	TCTTGCAAGTCTGACAGGACATGCAGGACCTTCGGTTGATCTAGCAATCTTCAGTCTACACTTAGCTGGGGCAAGCTCTATTCTTGGAGCTATCAACTTTATTACCACCATCATCAACATGAGAGCTCCAGGGATCACTCTACATAGAATGTCTCTGTTTGTTTGGTCTGTCCTTGTGACTGCCATCTTGCTACTGCTTTCACTGCCTGTTCTTGCTGGTGCGATTACAATGCTACTTACCGACCGAAACTTCAATACTACCTTCTTTGACCCTGCAGGGGGAGGAGACCCTGTCCTTTACCAACACTTGTTC
555	1092	BOLD;Arthropoda;Copepoda;Calanoida;Aetideidae;91.91	2	8	3	0	0	0	0	0	0	0	6	0	1	0	0	0	4	0	3	0	0	65	0	1	0	0	0	0	0	0	0	3	TTTATCTTCTAAGACAGGTCAACCAGGCCCAGCAATGGATTTAGCAATCTTAAGTTTACATGTAGCTGGAGCTTCTTCTATCTTAGGGGCAATAAATTTTATTACTACTATTTTAAACATGAGAACACCGGGAATGACTTTACATAAAATGCCATTATTCTCGTGGTCGATATTAGTAACGGCGTTTTTACTTTTATTATCATTACCAGTTTTAGCTGGAGCAATCACAATGCTTCTTACGGATAGAAATTTTGGAACTGCATTCTTTGAAGCTCAAACAGGCGGAGATCCAGTTTTATTCCAACACTTGTTT
556	1095	NCBI;cellular organisms;Eukaryota;Sar;Stramenopiles;Ochrophyta;Bacillariophyta;	0	18	0	0	0	0	0	0	0	0	0	0	0	0	0	0	0	0	0	0	0	0	0	0	1	0	0	0	0	0	0	0	TTTGTCAGGTATAACAGCTCATTCAGGAGGTTCCGTTGATTTGGCTATTTTTAGTCTTCATTTATCAGGAGCTGCCTCTATTTTAGGAGCAATAAATTTTATATGTACTATCACGAATATGAGATCTAAAAGTTTACCTTTTCATAGATTACCTTTATTTGTTTGGTCAGTTTTAATTACTGCTTTTTTATTGTTGTTATCTTTACCTGTTTTAGCGGGCGCTATAACTATGTTATTAACTGATCGTAATTTCAACACTACTTTCTTTGATCCAGCAGGGGGAGGAGATCCTGTGCTATATCAACATTTATTT
557	1098	NCBI;cellular organisms;Eukaryota;Sar;Stramenopiles;Ochrophyta;Bacillariophyta;Mediophyceae;Lithodesmiophycidae;Lithodesmiales;Lithodesmiaceae;	0	1	50	0	0	0	0	0	0	0	0	0	0	0	0	0	1	0	15	0	0	0	0	0	0	0	0	0	0	0	0	0	ATTATCGAGCGGAACTTCTCATTCAGGGGGTGCTGTAGATTTAGCAATTTTTAGCTTACATTTGTCAGGAGCTTCTTCAATTTTAGGTGCAATTAATTTTATATGTACTATTTTTAATATGCGTGTAAAAAGTTTAGCTTTTCATAAGTTACCTCTTTTTGTTTGGGCTGTTTTAATTACAGCTTTTTTATTATTGTTATCACTTCCAGTTTTAGCTGGTGCAATTACTATGCTATTAACAGATAGAAATTTTAATACTACTTTCTTTGATCCTGCTGGAGGAGGAGACCCTGTTTTATATCAGCATTTGTTT
558	1102	NCBI;cellular organisms;Eukaryota;Sar;Alveolata;Dinophyceae;	0	0	0	0	4	0	7	0	39	1	40	4	0	0	1	0	0	0	0	0	0	2	0	0	0	0	0	0	0	0	0	0	ACTATCTACTTCATTCATGAGTTTATCACCTTCCTCTACTAGTAATATTATTCTTGCTTTGTTAGTCTCTGGTGTTAGTTCAGCGCTTACTTCTCTTAACTTTTTCGTAACTATTTTACTTATGAGATCTTATTCTTCTACACTAAAGGTAATGCCACTATTCCCATGGGCTATTCTTATTACAGCTGCATTGCTTCTTATGTGCCTACCAGTCCTTTCTGGTGCATTACTTATGCTTTTAGCAGATCTACATTCTAATACACTTTTCTTTGATCCAGTTTTTGGAGGGGATCCTGTACTTTACCAACATTTATTT
559	1103	NCBI;cellular organisms;Eukaryota;Sar;Alveolata;Dinophyceae;	0	0	4	0	0	0	0	0	0	0	0	0	0	0	0	0	22	0	0	0	0	0	44	2	0	0	0	0	0	0	0	0	ATTAAGCACTTCCTTCATGAGTTTGTCACCTTCTAGTACAGTATATGTTATATTTGGATTATTATTTGCTGGTATATCCTCTTGTCTCACATCTCTTAACTTTTCGGTAACAATACTAAATATGAGATCTTATTGTCTGACATTAAAAACTATACCATTATTCCCTTGGGCTCTTTTAATTACAGCAGAAATGCTTTTATTAACATTACCAGTCTTAACAGCCGCTCTTCTTATGATATTGGCTGATCTTCATTCAAATACACTCTTTTTTGATCCAGTATTTCTCGGAGATCCTGTGCTCTATCAACATTTATTT
560	1105	BOLD;Pyrrophycophyta;71.97	0	5	0	0	0	0	0	0	77	0	3	0	0	0	0	0	0	0	0	0	0	7	0	0	0	0	0	0	0	0	0	0	ATTAAGTACATCACTAATAAGTTTATCATCTATTGGAATTGATGTCATCATATGTGGTTTACTATTGTCAGGTATATCATCAAGTCTAACATCTCTTAACTTCTTTGTTACTATTCAGAATATGAGATGCTATGGTATGACTTTATCTAATATGCCTATGTATGTATGGTCTGTTGTAATTACAGCATCTATGTTACTATTAGTCTTACCTATATTGACAGGAGCTCTTATAATGTTAATAGCAGATCTTCACTATAATACAGTTTTCTTTGATCCCTTATTTGGTGGTGATCCTGTGTTCTATCAACATTTATTT
561	1106	NCBI;cellular organisms;Eukaryota;Opisthokonta;Metazoa;Eumetazoa;Cnidaria;Hydrozoa;Hydroidolina;Siphonophorae;Physonectae;Forskaliidae;Forskalia;	0	5	3	0	0	0	0	0	0	0	0	0	4	0	0	0	0	0	0	0	0	55	0	0	0	0	0	0	0	0	0	0	TCTCTCAAGTAATCTTGGACATTCTGGTCCTGCTGTTGATATGGCTATACTTAGCTTGCACCTGGCTGGAGCCTCTTCAATTTTAGGAGCAATAAATTTTATTACTACTATTTTTAATATGAGAACTCCTGAAATGACGTTACACAGAATGCCTCTTTTTGTATGGTCTATCTTAGTTACAGTTTTCTTGCTAGTATTATCATTACCTGTATTGGCAGGCGCGATAACAATGTTACTAACTGATCGTAATTTCGGCACTGCATTTTTCGCTCCTGAAGGCGGAGGGGACCCTATTTTATTTCAGCATTTGTTT
562	1107	BOLD;Mollusca;71.97	0	0	0	0	34	0	1	14	22	0	19	0	0	0	0	0	6	0	0	0	0	0	0	2	0	0	0	0	0	0	0	0	TCTTTCTTCTGTACAATTTCACCCAGGAGCTTCTGTAGATTTAGCTATTTTTAGTTTACATATGGCAGGAGCTTCTTCAATAGCCGGGGCTATAAACTTTATTGTAACTATATTCAATATGAGATCCCCTGGTGTTAAAATGCATAACCTTCCATTATTTATTTGAACTTTATTAGTAACTGCATTCTTATTAGTTATTTCTTTACCTGTTTTAGCAGGGGGAATTACTATGCTTTTAACTGATAGAAACTTCAATACTTCATTCTTTGATCCTGCAGGTGGAGGAGACCCTATTTTATATCAACATTTATTT
563	1109	NCBI;cellular organisms;Eukaryota;Opisthokonta;Metazoa;Eumetazoa;Bilateria;	5	2	2	3	18	0	1	10	47	0	10	0	7	1	0	0	1	0	1	0	0	52	0	0	0	0	0	0	0	0	0	0	ACTTTCTAGTGTACAAGCACACTCTGGTCCTTCTGTTGACCTTGCTATTTTCAGTTTACACTTAGGAGGTACTTCTTCTATTTTAGGAGCTGTTAACTTCATTACAACTATTCTAAACATGCGCCCACCGGGAATGAGCATGCACAGAATGCCTTTATTTGTATGGTCTGTTCTAATTACAGCTGTACTTCTTCTTTTATCACTTCCAGTTCTTGCTGGAGCGATTACCATGCTTTTAACTGACCGTAACTTTAACACAACTTTCTTCGACCCAGCTGGTGGAGGAGACCCTATCCTATACCAACACCTATTC
564	1111	BOLD;Ochrophyta;82.03	0	0	3	0	0	0	0	19	0	0	9	0	0	0	0	0	0	0	0	0	0	38	0	0	0	0	0	0	0	0	0	0	ACTAGCAGGTGTAGCTGCACATTCAGGTCCTTCAGTAGATTTAGCTATTTTTAGTCTTCACTTAGCAGGTGCAAGTTCTATTATGGGTGCTTCAAATTTTATTACAACAATATTTAATATGCGAGCTCCAGGTATGACTCTACATAAAATGCCTTTATTTGTATGGGCTATTTTAATTACAGTTTTCTTATTATTGTTATCATTACCAGTTTTAGCAGGTGCTATTACTATGTTATTAACTGATCGTAATTTTAACACAACATTCTTCGATCCAGCAGGTGGTGGTGACCCAGTGTTATACCAACACTTATTC
565	1119	NCBI;cellular organisms;Eukaryota;Viridiplantae;Chlorophyta;Chloropicophyceae;Chloropicales;Chloropicaceae;Chloropicon;Chloropicon mariensis;	0	0	0	0	24	0	1	8	4	0	3	0	0	0	0	0	0	0	0	0	26	0	28	40	0	2	23	0	0	0	0	0	ATTAAGTAGTATTACGGCTCACTCAGGTGGTGCTGTGGATTTGGCTATTTTTAGTTTACACGTTTCAGGTGCTGCAAGTATCTTAGGTGCTATTAACTTTATTACAACAGTATTTAATATGCGCGCCCCAGGAATGAGTTTTCACCGTCTTCCTCTTTTTGTGTGGTCGGTTCTAATTACTGCCTTTCTACTTCTACTATCTCTTCCTGTTCTTGCAGGAGGTATTACAATGCTTTTAACAGACCGAAACTTCAATACAAGTTTCTTTGATCCTGCAGGAGGAGGAGACCCTGTATTATTCCAGCACTTATTC
566	1120	NCBI;cellular organisms;Eukaryota;Rhodophyta;Florideophyceae;Corallinophycidae;	0	0	3	0	0	0	0	0	0	0	0	0	0	0	0	0	5	2	7	0	0	0	70	0	0	0	1	0	0	0	0	0	GTTATCAAATAAGCTTGGTCATGCAGGGCCATCTGTTGATATGGCAATTTTTGCTCTCCATTTAGCTGGAGCTTCTTCAATTCTAGGAGCGGTGAATTTCATTACAACTATTTTAAATATGAGAACGCCAGGAATGACTATACACAAAATGCCTCTTTTTGTATGGGCAATGCTCATTACAGCTTTCTTATTATTACTAGCTGTTCCTGTTCTTGCTGGGGCTATTACTATGCTTCTAACTGATAGAAATTTTGGAACAACATTTTTTAACCCTGCAGGTGGTGGAGATCCAGTTTTATTTCAACACTTATTC
567	1121	NCBI;cellular organisms;Eukaryota;Sar;Stramenopiles;Ochrophyta;Bacillariophyta;	0	0	10	1	0	0	0	0	0	0	0	0	0	2	0	0	82	0	0	0	0	0	14	2	1	0	10	0	0	0	0	0	ATTATCAAGCGCAACAGCTCATTCTGGAGGCTCTGTAGATTTAGCAATATTCAGTTTACACTTATCTGGTGCTTCTTCTATTTTAGGAGCTATTAATTTTATTTGTACTATTTTTAATATGCGAGTAAAAAGTTTATCGTTCCATAACCTCCCTTTATTTGTGTGATCTGTTTTAATTACAGCATTCTTACTATTACTGTCTTTGCCTGTGTTGGCAGGAGCAATAACCATGCTATTGACAGATAGAAATTTTAACACCACCTTTTTTGACCCTGCTGGAGGAGGAGATCCTGTACTATTTCAGCACCTTTTT
568	1122	NCBI;cellular organisms;Eukaryota;Opisthokonta;Metazoa;Eumetazoa;Bilateria;Protostomia;Spiralia;Lophotrochozoa;Annelida;Polychaeta;unclassified Polychaeta;Polychaeta sp. RCMB0454;	0	0	0	0	0	0	0	0	0	0	91	0	0	0	0	0	0	0	0	0	0	0	0	0	0	0	0	0	0	0	0	0	TCTGGCTAGTAATATTGCTCACGCTGGACCCTCAGTAGACCTAGCCATTTTCTCCTTACACCTAGCAGGAGTTTCATCAATTCTCGGTGCACTAAATTTCATTACTACCATTATAAACATACGATCAACAGGAATACAACTAGAACGAGTCCCCTTATTTATCTGATCTGTAGGGATCACCGTTTTACTTCTATTACTTGCTCTTCCAGTATTAGCTGGTGCAATTACTATACTTCTCACAGACCGAAACCTAAACACTGCATTCTTTGACCCTACAGGAGGCGGAGACCCTATTCTATACCAGCACCTTTTT
569	1123	NCBI;cellular organisms;Eukaryota;Sar;Stramenopiles;Oomycota;Pythiales;Pythiaceae;Pythium;Pythium terrestris;	4	3	3	54	8	0	0	0	0	0	5	0	1	0	0	0	4	0	0	0	0	0	25	2	0	0	0	0	0	0	0	0	TTAAGTACTTCTTTGATGAGTTTATCACCAGTGACGATAGATCTTATTATAGATGGTTTATTGATTAATGGTCTATCTTCTTTTTTTTCATCCTTGAATTTTATGGGAACCATTAGTAATATGCGTTTATCAGGATTTATTTTATTATCATTATTTTCTTGCGGGATCTTAATTACAGCTCTCTTACTATTATTAACTCTACCGATCTTAACCGGTGCTTTAGGAATGTTATTAGGGGATCTTCATTTCAATACCGTTTATTTTGACTCCGGTTTTGGAGGGGATCCCGTATTATACCAACATTTCTTT
570	1124	NCBI;cellular organisms;Eukaryota;Sar;Stramenopiles;Ochrophyta;Bacillariophyta;	0	0	2	1	0	0	6	6	0	0	87	0	0	0	0	0	0	0	0	0	0	0	0	0	0	0	0	0	0	0	0	0	TTTATCAAGTGGAACAGCACATTCAGGCAGTGCTGTTGATTTAGCTATTTTTAGTCTACATATAGCAGGAGCTTCATCAATTTTAGGGGCGATAAACTTTATTTGTACTATAGTAAATATGAGAGTTAAAAGTTTATCTTTTCATAGATTACCATTATTTGTTTGGTCTGTTTTAATCACAGCTGTTTTATTATTATTATCTTTACCAGTTTTAGCGGGGGCTATTACAATGTTATTAACTGATAGAAATTTTAATACCACTTTCTTTGATCCTGCAGGTGGTGGTGATCCAGTATTATATCAGCATCTATTT
571	1126	NCBI;cellular organisms;Eukaryota;Sar;Alveolata;Dinophyceae;	0	0	0	0	0	0	0	0	90	0	0	0	0	0	0	0	0	0	0	0	0	0	0	0	0	0	0	0	0	0	0	0	ATTAAGCATTTCTTTCATGAGTTTATCACCTTCAAGTACAGCTTTCATAGTCTTTGGATTATTAATCTCAGGTATATCCTCATCTCTTACATCTCTTAACTTTTGGACAACAATTCTAAATATGAAATCTTATTATCTGACATTAAAGACTATGGCATTATTCCCTTGATAACAGGAGGAATGTTTTTATTATCATTACCAATCTTATCAGGAGCTCTTTTAATAGTCTTGGCTGATCTTCATTCTAATACACTTTTCTGTGATCCAATTGTTCGTGGAGATCCTATAATCTATCAATACATATTT
572	1128	NCBI;cellular organisms;Eukaryota;Opisthokonta;Metazoa;Eumetazoa;Bilateria;Protostomia;Ecdysozoa;Panarthropoda;Arthropoda;Mandibulata;Pancrustacea;	0	39	0	0	0	0	0	0	0	0	0	0	9	0	0	0	0	0	0	0	4	46	0	0	0	0	0	0	0	0	0	0	TTTAAGTAGAAATATTGCCCATGGCGGAGCCTCAGTGGACTTTGCTATTTTTTCTTTACATTTAGCTGGAGTGTCTTCACTTTTAGGGGCCGTTAATTTTATTAGAACCCTTAGAAACCTCCGATCAATAGGAATGCTAGCAGACCGGATACCATTATTCCCTTGAGCAGTTTTAATTACCGCGATCTTACTTCTTCTCTCACTTCCGGTATTAGCTGGGGCTATCACCATGCTTTTAACAGACCGAAACTTTAATTCCTCATTTTATGATCCTAGAGGAGGAGGGGACCCCTTACTCTATCAACACCTTTTC
573	1129	NCBI;cellular organisms;Eukaryota;Opisthokonta;Metazoa;Eumetazoa;Bilateria;Protostomia;Spiralia;Lophotrochozoa;Nemertea;unclassified Nemertea;Nemertea sp. BOLD:ACM6863;	0	0	0	0	0	0	0	0	0	0	127	0	0	0	0	0	0	0	0	0	0	0	0	0	0	0	0	0	0	0	0	0	CCTTTCAAGAAATTTAGCCCATGCAGGGCCATCTGTAGACTTGGCTATCTTTTCCCTACACCTAGCAGGAGCCTCTAGAATTCTAGGTGCCATTAATTTTATTACAACCGCTATTAATATACGATCTGAAGGCTTACAACTAGAACGTATACCACTTTTTGTATGATCAGTAAAAATTACCGCAATTTTACTCCTTCTATCTTTACCTGTACTAGCAGGTGCAATTACTATATTACTAACAGATCGAAACTTAAATACTGCATTTTTTGACCCTTCAGGGGGAGGTGACCCAATTTTATACCAACATCTTTTT
574	1130	NCBI;cellular organisms;Eukaryota;Sar;Stramenopiles;Ochrophyta;Bacillariophyta;Bacillariophyceae;Bacillariophycidae;Naviculales;	0	0	0	0	0	0	0	0	0	0	94	0	0	0	0	0	0	0	0	0	0	0	0	0	0	0	0	0	0	0	0	0	ACTAGCAGGTATAACAGCACACTCTGGTGGAGCAGTTGATTTAGCAATATTTAGTCTACACCTTGCAGGAGCTGCTTCTATTTTAGGAGCTATCAACTTTATTTGTACAATAACAAATATGAGAGCAAAAAGTTTACCTTTCCATAAATTACCACTATTCTGCTGGTCAATTTTTGTAACTGCCATTTTATTATTATTAGCACTACCTGTTTTAGCAGGAGCAATTACAATGCTTTTAACTGACCGTAATTTCAATACTACTTTTTTTGATCCAGCAGGAGGCGGTGACCCTGTACTTTATCAGCATCTTTTT
575	1132	NCBI;cellular organisms;Eukaryota;Sar;Alveolata;Dinophyceae;	0	0	9	1	0	0	10	16	3	4	48	18	0	2	1	0	0	0	0	0	0	0	0	0	0	0	0	0	0	0	0	0	TTTAAGCACTTCATTTATGAGTTTATCTCCTTCAAGTACAGGTAATCTTATATTTGGATTATTAATATCTGGTATATCATCTTGTCTTACTTCTCTTAACTTTTTCATAACTATTCTTAATATGAGATCTTATTATCTGACATTAAAATTATTACCTTTATTTTCTTGGTCTCTCTTAATTACTGCTGGAATGCTACTTTTAACTCTCCCAATCTTAACTGGAGCACTTATAATGGTTCTAGCTGATCTTCATTCTAATACACTTATGTTTGATCCAATCTTTGGAGGAGATCCTATATTATATCAACATTTATTT
576	1133	NCBI;cellular organisms;Eukaryota;	0	24	19	0	0	0	0	0	0	0	0	0	0	0	0	0	31	0	6	0	0	0	0	0	0	0	0	0	0	2	0	0	TTTATCAAGTGTTCAAGCACATTCAGGACCTTCAGTTGACCTTGCTATTTTTAGTTTACACTTAGCAGGAGCTTCTTCTATTCTTGGTGCTGTTAATTTCATTACAACAATTATTAACATGCGACCTCCAGGAATGACATTCCATAAAATGCCTTTATTTGTATGGTCTGTTTTAATTACAGCTGTTTTACTACTTCTTTCTTTACCGGTTCTTGCAGGAGCTATTACAATGCTTCTTACAGACCGTAACTTCAATACAACATTCTTTGATCCAGCTGGAGGAGGAGATCCTATTCTTTATCAACACTTGTTC
577	1134	NCBI;cellular organisms;Eukaryota;Opisthokonta;Metazoa;Eumetazoa;Cnidaria;Hydrozoa;unclassified Hydrozoa;Hydrozoa sp. HS0174;	0	0	2	0	10	0	1	88	0	0	120	0	0	4	0	0	0	0	0	0	0	0	0	6	0	0	0	0	0	0	0	0	TTTATCACTTCAGGGTGGTAATTCGATGCCGTTTGTTGTTTTTGCTATTCATTTGTTAGGAATCTCGTCAATTCTTGGCGCAATAAATGTAATTGCTACTATTTTGAATATGAGAGCACCAGGAATGACGTTAATGAAGATGCCTATGTTCGTATGGACGTGGCTAATTACAGCTTTTCTACTTATCGCAGCTATGCCAGTTTTAGCAGGAGCTATAACCATGCTATTAACTGATAGATTCTTTGGGACTAGTTTCTTCACAGCTTCTGGTGGAGGCGACCCAGTGATGTTTCAACATATCTTC
578	1135	BOLD;Cnidaria;78.9	0	0	0	0	0	0	0	0	0	0	0	0	0	0	0	0	0	0	0	0	0	0	0	0	0	0	0	0	276	0	0	0	ATTAAGTTCTAAATTAGGACACCCAGGGCAGTCCGTTGATTTCTTGATTTTAGGAATACATCTTTTAGGAGCATCATCTATTTTGGGAGCAATTAATTTTATTACTACAATTTTTAATATGCGTGCTCCTGGAATGACATTACATAAAATGCCTTTATTTGTTTGGTCTATTTTAGTTACAGTTTTTCTATTGCTTTTATCACTTCCTGTGCTTGCAGGTGGAATTACCATGCTTTTAACGGATAGAAATTTTGGAACAAGTTTTTTTGACCCAGCAGGAGGAGGAGATCCACTTTTATTTCAACATCTTTTC
579	1138	NCBI;cellular organisms;Eukaryota;Opisthokonta;Fungi;Dikarya;Basidiomycota;Pucciniomycotina;Microbotryomycetes;Sporidiobolales;Sporidiobolaceae;Rhodotorula;	0	9	1	6	21	0	0	1	7	3	5	4	0	0	1	0	27	0	1	0	0	0	0	0	0	0	0	0	0	0	0	0	ACTATCAGGAATCCAAAGCCACTCAGGTGGATCAGTTGACCTGGCTATCTTCAGCCTACACCTATCAGGTATCAGTTCAATGTTAGGAGCGATGAACTTCATCACTACAATCCTAAACATGCGACACCCTGGTATGTCAATGCACAAACTTCCTCTATTCTGTTGGGCTATCTTCATTACAGCTATTCTACTTCTACTATCACTACCAGTGCTAGCAGGTGGAATTACAATGCTGCTAACAGATCGAAACTTCAACACATCATTCTACGACCCAGCTGGAGGAGGTGACCCAATCCTATTCCAACACCTATTC
580	1139	NCBI;cellular organisms;Eukaryota;Opisthokonta;Metazoa;Eumetazoa;Ctenophora;Tentaculata;Lobata;Lampoctenidae;Lampocteis;unclassified Lampocteis;Lampocteis sp. V LMC-2021;	0	0	0	0	0	0	0	0	0	0	0	0	0	0	0	0	0	0	0	0	107	0	1	0	0	0	0	0	0	0	0	0	ATATTCTTCTTACCCTGCTAGTTCATCTTTATCTACAGATTTAGTAATCTTTTCATTACACTTAGCGGGTGCTAGTTCTATATTATCTTCTATTAACTTTATTGTTACAGTATTTATTTTACCTTTAAATTCTTCATTTTCATTTTTTCAATATCCTTTGTTTATAATATCTCAGATGACCGTAGCTTTCTTATTATTAATTTCTTTGCCTGTATTAGCTGCAGCTATTACTATGCTTCTTTTTGATCGTAATTTCAATACTTCATTTTTTTCTAATTATTTAGGAGGGGATGCTCTTTTATATCAACATTTATTT
581	1146	NCBI;cellular organisms;Eukaryota;Sar;Stramenopiles;Ochrophyta;Bacillariophyta;	0	8	0	1	0	0	0	0	0	0	0	0	0	0	0	0	0	0	3	0	0	0	0	0	0	0	0	0	0	0	0	0	TTTATCTAGTGGAACTTCGCACTCAGGAGGTTCTGTGGATTTAGCGATTTTTAGTCTTCATTTATCTGGAGCTTCTTCTATTTTAGGTGCAATAAATTTTATTTGTACTATTTTTAATATGAGAGTAAAAAGTTTAGCTTTTCATAAACTTCCTCTTTTTGTATGGGCTGTTTTAATTACAGCTTTTTTACTATTATTATCGTTACCAGTACTAGCGGGTGCTATTACAATGTTATTGACTGATAGAAATTTCAATACAACTTTTTTTGATCCTGCTGGAGGAGGTGATCCTGTTTTATACCAGCATTTATTT
582	1147	BOLD;Porifera;76.89	0	1	1	0	0	0	0	1	0	0	0	0	0	0	0	1	3	0	0	0	0	2	0	3	0	0	0	0	0	0	0	10	TCTTTCAAGCTCGGCAGGTTCTCCGGGTATGGGTATGGACCTTGCAATATTTTCTCTACATTTAGCGGGCGCATCTTCAATATTAGGTGCAGCAAACTTTATAACAACGATATTTAACATGAGGGCACCTGGAATGACACTTCACAAAATGCCATTATTTGTGTGGTCAATGCTAGTTACAGTTTTTTTGTTATTGTTAGCCATACCTGTACTAGCTGGTGCAATAACGATGTTACTTACTGATAGAAATTTTGGAACAAGTTTTTTTATTCCAGAAGGGGGTGGTGATCCTATTCTATTTTTGCATCTATTT
583	1148	NCBI;cellular organisms;Eukaryota;Sar;Alveolata;Dinophyceae;	0	14	0	0	0	0	0	0	0	0	0	0	0	0	5	0	37	0	1	0	0	24	0	0	0	0	7	0	7	0	0	0	ATTAAGCACTTCTTTTATGAGTTTATCACCTTCAAGTACAGCTTATCTTATCTTTGGATTATTAATGTCAGGTGTATCCTCATGTCTCACATCTCTTAACTTTTGGATAACAATTCTAAATCTGAGATCTTATTATCTGACATTAAAGACTATGCCATTATTCTCTTGGGCTCTCTTGATGACAGGAGGAATGCTTTTATTAACATTACCAATCTTATCAGGAGCTCTTCTTTTTATTATAGCTGATCTTCATTCTAATACACTTTTCTTTGATCCAATCTTTGGAGGAGATCCTATATTCTATCAACACTTATTT
584	1149	NCBI;cellular organisms;Eukaryota;Rhodophyta;Florideophyceae;Rhodymeniophycidae;Ceramiales;Rhodomelaceae;Chondrieae;Chondria;Chondria dasyphylla;	0	0	0	0	0	0	0	0	0	0	0	0	0	84	0	0	0	0	0	0	0	0	0	0	0	0	0	0	0	0	0	0	TTTAAGTTCTATACAAAGCCATTCAGGAGCTTCAGTAGATTTAGCTATTTTTAGTTTACATTTATCCGGAGCTTCTTCAATTCTTGGAGCTATAAATTTCATATCTACTATATTAAATATGCGCAATCCTGGACAAACTTTTTATAGAATACCTTTATTTGTTTGATCTATATTTGTTACAGCTTTTTTATTATTGTTAGCAGTACCTGTCTTAGCAGGAGCTATTACTATGTTACTTACTGATAGAAACTTTAATACATCATTTTTCGATCCTTCTGGAGGAGGAGACCCTATACTTTATCAACATTTATTC
585	1150	NCBI;cellular organisms;Eukaryota;Sar;Alveolata;Dinophyceae;	0	0	0	0	0	0	0	0	0	0	0	0	0	0	0	0	0	0	0	0	1	0	0	0	0	0	78	0	0	0	0	0	ATTATCTACTTCTTTCATGACTTTATCTCCATCTTCTACCGGAAATCTTATCTTTGGATTATTAATCTCTGGTATATCCTCATGTCTCACATCTCTTAATTTTTGGATTACAATTCTAAATCTGAGATCATATTATCTGACATTAAAGAATATACCATTATTCCCTTGGTCCTTCTTGATTACTGCTTTCATGCTTTTATTAACATTACCTATCCTATCAGGAACACTTCTATTAATATTAGGTGATCTTCATTCAAATACACTTTTCTTTGATCCAATCTTTGGAGGAGATCCTATATTCTATCAACATTTATTT
586	1152	NCBI;cellular organisms;Eukaryota;Rhodophyta;Florideophyceae;	0	2	5	0	7	0	2	47	0	0	80	0	0	0	0	0	0	0	0	0	0	106	1	2	0	0	0	0	0	0	0	1	ACTTTCTACTACAGCTCAACCAGGCCCAGCAATGGATCTAGCGATTTTAAGTTTACATATAGCTGGTGCCTCATCAATTCTAGGAGCGATAAACTTTATTACCACAATTTTTAACATGAGAGCTCCAGGCATGACTCTTCATAAAATGCCATTATTTGTATGGTCAATGTTGGTAACTGCGTTTTTATTATTACTTGCTGTCCCGGTATTAGCTGGTGGTATTACAATGTTATTAACTGATAGAAATTTTGGAACTGCTTTCTTTAATCCTGAAGGCGGTGGAGATCCAATTTTATTCCAACACTTATTC
587	1153	NCBI;cellular organisms;Eukaryota;Sar;Alveolata;Dinophyceae;	0	28	0	0	0	0	2	0	0	0	2	0	0	0	0	0	0	1	0	0	0	9	9	0	0	2	31	0	15	0	0	0	ATTAAGTACTTCTTTTATGAATTTATCACCTTCAAGTACAGCTTATCTTATATTTGGATTATTAATGTCAGGTATATCCTCATGTCTCACATCTCTTAATTTTTATATTACAATATTAAATATGAGATCTTATTATTTGACATTAAAGATTATGCCATTATTCCCTTGGTCTCTCTTAATAACAGGAGGAATGCTTTTATTAACATTACCAATCTTATCAGGAGCTCTTCTAATGATTTTGGCTGATCTTCATTCTAATACACTTTTCTTTGATCCAATCTTTGGAGGAGATCCTATATTTTATCAACATTTATTT
588	1155	NCBI;cellular organisms;Eukaryota;Sar;Stramenopiles;Oomycota;Saprolegniales;Saprolegniaceae;Saprolegnia;Saprolegnia turfosa;	0	0	0	0	0	0	0	0	0	0	0	0	0	0	0	0	0	0	0	0	0	0	56	0	0	0	16	3	0	0	0	0	TTTGTCGAATTCTTTATATCATCCAGGACCTTCTGTAGATTTTGTAATATTCAGTTTACATATTGCTGGTATATCGTCTATATTGGGTGCTGTTAACTTTATTACTACTATTTTTAATATGAGATGTCCCGGTATGACTATGTTTAAATTACCTTTATTTGTATGGTCTGTGTTTGTAACAGCTTTTCTTTTATTACTATCGTTACCTGTATTAGCAGGTGGTATTACCATGGTTTTAACAGATCGTCATTTAAATACATCTTTTTTTGATCCTAAGGGTGGGGGTGATCCCGTTTTATACCAGCATTTATTT
589	1156	NCBI;cellular organisms;Eukaryota;Sar;Stramenopiles;Ochrophyta;Bacillariophyta;Bacillariophyceae;Bacillariophycidae;Bacillariales;Bacillariaceae;Nitzschia;Nitzschia palea;	22	0	17	0	0	0	0	0	0	0	0	0	0	0	0	0	23	0	14	0	0	0	0	0	0	5	0	0	0	0	0	0	ATTGTCAGGAGTTATGTCACATTCTGGAGGATCGGTAGATTTGGCTATTTTTAGTCTACATCTATCGGGAGCATCTTCAATTCTTGGTGCGATTAATTTTATTTGCACTATTGTGAATATGCGAACCGAAAGTTTACCTTTTCATAAGTTACCATTATTTGTTTGGGCCGTTTTTATTACTGCTATCTTGTTGTTATTAGCATTACCTGTATTAGCAGGGGCAATTACAATGTTACTTACTGATAGAAATTTTAATACTACTTTTTTTGACCCAGCTGGCGGAGGTGATCCGGTTCTTTTCCAACACCTATTT
590	1159	NCBI;cellular organisms;Eukaryota;Sar;Stramenopiles;Ochrophyta;PX clade;Phaeophyceae;Fucales;Fucaceae;Fucus;Fucus vesiculosus;	0	0	0	0	0	0	0	0	0	0	0	0	0	0	0	0	0	0	0	0	0	0	0	0	0	0	0	0	97	0	0	0	ACTTTCGAGAGTTCAGGCTCACTCTGGTCCATCGGTAGATTTAGCAATTTTTAGACTTCACCTTGCTGGTGCAAGATCGATTTTAGGAGCTGCTAACTTCATTACCACTATTCTAAACATGCGAGCGCCGGGTATTAGAATGCATAATATGCCATTATTTGTTTGGTCTATTTTTGTTACCGCGATTTTATTACTATTATCGCTACCTGTTTTAGCCGGAGCTATTACCATGTTATTAACTGATCGTAATTTCAATACTACTTTCTTTGATCCTGCTGGTGGTGGTGATCCTGTGCTTTACCAACACTTATTC
591	1161	NCBI;cellular organisms;Eukaryota;Sar;Stramenopiles;Ochrophyta;Bacillariophyta;Coscinodiscophyceae;Rhizosoleniophycidae;Rhizosoleniales;Rhizosoleniaceae;Guinardia;Guinardia delicatula;	0	0	52	17	0	0	0	0	0	0	0	0	0	0	0	0	2	0	1	0	0	0	0	0	0	0	0	6	0	0	0	0	ATTGTCTAGTATAAATTCACATTCGGGAGCTTCTGTAGATTTAGCTATTTTTAGTTTACATTTATCAGGTGCCGCTTCTATTTTAGGTGCCATTAATTTTATATGTACCATATTTAATATGAGAATAAAAAGTTTATATATGCATAGACTTCCTTTATTTGTATGGGCAATTTTAATAACAGCTTTTTTACTTTTATTATCATTACCTGTACTTGCTGGAGCAATTACAATGCTATTAACGGACAGAAACTTTAATACAACTTTTTTTGATCCAGCTGGTGGAGGAGATCCTGTTTTATATCAACATTTATTT
592	1166	NCBI;cellular organisms;Eukaryota;Sar;Stramenopiles;Ochrophyta;Bacillariophyta;Coscinodiscophyceae;Rhizosoleniophycidae;Rhizosoleniales;Rhizosoleniaceae;	0	0	41	1	0	0	0	0	0	0	0	0	0	0	0	0	7	0	0	0	0	0	0	0	0	0	0	0	0	0	0	0	ATTATCTAGTGGTAATTCTCATTCAGGAGCTGCAGTTGATTTAGCGATTTTTAGTTTACATTTATCAGGAGCTGCATCTATTCTAGGTGCAATTAATTTTATTTGTACCATTTTAAACATGCGAGTTAAAGGTTTATTTATGCATAGATTACCTTTATTTGTATGGTCTATATTAATAACTGCAGTATTGTTATTATTATCATTACCTGTTTTAGCAGGTGCAATTACAATGCTTTTAACTGATAGAAATTTTAACACTACATTTTTCGACCCTGCAGGAGGAGGAGATCCTGTTTTATACCAACATTTATTT
593	1167	NCBI;cellular organisms;Eukaryota;Opisthokonta;Metazoa;Eumetazoa;Bilateria;Deuterostomia;Chordata;Tunicata;Thaliacea;Doliolida;Doliolidae;Doliolum;Doliolum nationalis;	0	0	0	0	0	0	16	1	0	0	0	0	0	0	83	0	0	0	0	0	6	0	0	0	0	0	0	0	0	0	0	0	TCTTTCCAGAAACCTAGCACACGCCAGGCCTTCAGTTGACTGTGCTATCTTTTCTCTTCATCTAGCTAGAGTATCTAGTATTCTAGGGTCCATTAATTTTTTAGTGACTATAATGAACATAATAAGTAAAAGACAAACTTACGGGAATCTTTCCTTATTTTGCTGGTCCATTGTAGTGACTACTATTTTATTAATCCTATCCCTACCAGTGTTGGCTGCAGCGATTACAATACTTCTATTCGATCGTAATTTCAACACTTCTTTCTTCGACCCCGCTAGAAGGGGAGACCCAATCCTTTACCAACATCTCTTT
594	1168	BOLD;Heterokontophyta;Oomycota;85.11	0	0	3	0	0	0	0	9	1	0	20	1	0	0	0	0	10	0	0	0	0	39	0	1	0	0	0	0	0	0	0	0	ATTATCAAGTGTTCAAGCACACTCAGGTCCTTCAGTAGATTTAGCAATCTTTAGTTTACATATCGCAGGTGCTTCATCAATTTTAGGTGCAATTAACTTTATTTGTACTATTTTTAATATGCGAGCTCCTGGTTTAAGCTATCACCGATTACCTTTATTCGTATGGGCAGTTTTAATTACAGCGTTCTTATTATTATTATCGCTTCCTGTATTAGCTGGAGCTATTACTATGTTATTAACTGACCGTAACTTTAATACTACCTTCTTTGACCCAGCTGGTGGAGGAGACCCTGTATTATACCAACATTTATTC
595	1169	BOLD;Ochrophyta;Phaeophyceae;87.06	0	2	0	0	4	0	0	8	0	0	8	0	2	0	0	0	1	0	0	1	0	66	0	0	0	0	0	0	0	0	0	0	ATTAAGTAGTATACAAGCTCATTCAGGTCCTTCTGTCGATTTAGCTATTTTTAGTTTACATTTATCGGGAGCTTCATCAATTTTAGGTGCTATTAATTTTATTACAACTATTTTTAATATGCGTGCTCCAGGTATGTCTATGCATAGATTACCTTTAATGGTATGGGCGGTTTTAATTACTGCATTTTTATTATTACTTTCTTTACCTGTATTAGCTGGAGCTATTACTATGTTATTAACAGATAGAAATTTCAACACAACTTTCTTTGATCCTGCCGGAGGTGGTGATCCTGTTTTATACCAACATTTATTT
596	1173	NCBI;cellular organisms;Eukaryota;Sar;Stramenopiles;Ochrophyta;Bacillariophyta;Mediophyceae;Lithodesmiophycidae;Lithodesmiales;Lithodesmiaceae;Lithodesmium;	0	7	2	0	0	0	0	0	0	0	0	0	0	0	0	0	11	0	0	0	0	0	0	0	0	0	0	0	0	0	0	0	TTTATCTAGTGGAACATCGCACTCAGGAGGTGCTGTTGATTTGGCTATTTTTAGTTTACATCTTTCAGGAGCTTCTTCGATTTTAGGTGCTATTAATTTTATTTGTACTATTTTTAATATGAGAGTGAAAAGCCTTTCTTTTCATAAATTGCCTTTATTCGTATGGGCTGTTTTAATTACTGCTTTTTTACTTCTTTTATCTTTACCTGTATTAGCCGGAGCTATCACAATGCTTTTAACTGATCGTAATTTTAACACTACTTTTTTTGACCCTGCTGGTGGAGGTGATCCCGTTTTATACCAGCATTTGTTT
597	1174	NCBI;cellular organisms;Eukaryota;Rhodophyta;Florideophyceae;Rhodymeniophycidae;Plocamiales;Plocamiaceae;Plocamium;Plocamium cf. angustum NZ 2 GWS-2011;	1	0	29	0	0	0	0	0	0	0	0	0	0	0	0	0	0	0	63	0	0	0	0	0	0	0	0	0	0	0	0	0	ATTATCAGCTATTGAAGGAGGAGGTGTAGATTGTTTATTAGTATCTTTACAATTTGCTGGTGCATCTTCAATAATGGGAGCTATAAATTTTGCTACTACTATTTTATATAATAGAGCTATAGGTTTACCTATTTACCAAATGTCTATGTTTTGTTGGTCTGTATTAGTCACAGCTATTTTATTAATAATATCTTTACCTATGTTGGCTGGAGCTTTATTTATGTTATTAGCTGATAGGCACTTTAATGGAAGTTTTTTTGATTACGAAGGAGGTGGGGATCCTATATTATATCAACATTTATTT
598	1175	BOLD;Heterokontophyta;82.59	0	0	0	0	0	57	0	0	0	0	0	0	0	0	0	0	0	0	0	0	0	0	10	0	0	0	30	0	10	0	0	0	ATTATCAAATTCGGTATACCATCCAGGACCATCTGTAGATTTAGTTATTTTTAGTTTACATATTGCAGGTATTTCTTCTATATTAGGTGCTGTTAATTTTATTACAACTATTTGTAATATGCGTTGTCCAGGATTAACGATGTTTAAATTACCGTTATTTGTTTGGTCAGTATTAATTACGGCTATTCTTTTATTATTATCTTTACCAGTTTTAGCAGGTGGGATTACTATGGTTATAACGGATCGTCATATGAACACAGCGTTTTTTGACCCTAAAGGTGGAGGTGATCCAGTTTTATACCAGCATTTATTT
599	1176	BOLD;Heterokontophyta;77.12	0	0	0	0	0	0	0	0	0	0	0	0	0	0	0	0	0	0	0	0	0	0	1	0	1	0	124	0	0	0	0	0	CTTAGCAAGTAATTCAGGACATCCAGGTACTGCTGTAGATTGTGCTATATTTAGTTTACATTTAGCAGGTATATCATCTATAGCTGGAGCTATAAACTTTATAGTTACTATAACGAACATGAAAGCTAGAGGAATGTCTTTTTTAGATTTACCTTTATTTTGTTGGGCTGTGTATATAACAGCTATATTATTATTATTGTCTTTACCAGTTTTAGCTGGTGGAATAACAATGCTATTAACTGATCGTAATATAGGCACACATTTTTTTGACCCTTATGGTGGAGGTGATCCAGTATTATATCAACATTTATTT
600	1178	NCBI;cellular organisms;Eukaryota;Opisthokonta;Metazoa;Porifera;Demospongiae;Heteroscleromorpha;	0	0	4	0	0	0	0	0	0	0	0	0	0	0	0	23	0	0	0	0	0	2	0	3	0	0	0	0	0	0	0	47	GTTATCATCTACAATTGGACACGCATCTCCTGCTGTAGATATGGCTATTTTATCACTTCACTTGGCTGGTGCTTCATCAATATTGGGAGCAATTAATTTTATAACTACAATATTTAATATGCGTGCACCTGGAATGACTCTTCACAAAATGCCTTTATTTGTATGGTCAATATTAGTAACAGTATTTTTGTTAGTCTTGTCTCTTCCTGTTTTAGCAGGAGCTATAACTATGCTTCTTACAGATAGAAACTTTGGAACTGCATTTTTTGCCCCCGAATTAGGGGGAGACCCGATGTTATTTCAACACTTATTT
601	1184	BOLD;Bacillariophyta;84.14	0	0	18	1	0	0	0	0	0	0	0	0	0	0	0	0	23	0	15	1	0	0	0	0	0	0	0	0	0	0	0	0	TTTATCAAGTATAATTGCTCACTCAGGAGGATCGGTAGATTTAGCAATTTTTAGTCTTCATGTTTCAGGAGCAGCTTCTATTTTAGGAGCTATCAATTTTATTTGTACTATTTTAAATATGAGATCAAAAAGTTTATCGTTTCATCAATTACCATTATTCGTTTGGGCTATATTAATAACAGCAGTATTATTATTATTATCTTTACCTGTTTTAGCTGGCGCTATTACAATGTTGTTAACAGATAGAAATTTCAATACTACTTTTTTTGATCCTGCAGGTGGAGGTGATCCTGTTTTATATCAACATTTATTT
602	1186	NCBI;cellular organisms;Eukaryota;Eukaryota incertae sedis;Picozoa;unclassified Picozoa;Picobiliphyte sp. MS584-11;	0	3	0	1	0	0	0	1	0	0	3	1	0	0	0	0	14	0	0	0	0	130	0	0	0	0	0	0	0	0	0	0	TCTTGCTAGCATTCAGTTCCACTCTGGTGGTGCTGTAGATTGTGCAATTTTTGCTCTTCACGTAGCAGGAGCTTCTTCTATTCTTGGAGCTATTAACTTTATTACTACTGTAATGAACATGCGAGCTCCAGGTATTAGTCTTCACCGAATGCCTCTATTCGTATGAAGTATCTTTGTAACTGTAGTTTTACTTCTTTTAGCGGTACCTGTTCTTGCTGGTGCAATTACTATGCTACTAACTGACCGAAACTTTAACACTACTTTCTTTGACCCTGCAGGGGGAGGAGACCCAGTGTTATACCAACACTTATTC
603	1188	NCBI;cellular organisms;Eukaryota;Opisthokonta;Metazoa;Eumetazoa;Bilateria;Protostomia;Ecdysozoa;Panarthropoda;Arthropoda;Mandibulata;Pancrustacea;	0	0	0	0	0	0	0	0	0	0	0	0	0	0	0	0	0	10	0	0	0	0	3	0	0	0	0	0	96	0	0	0	CCTTGCAAGTATTGCCTTCCATTCTGGAGGTGCAGTTGATTGTGCGATTTTTGCTCTTCACGTTGCAGGAGCATCTTCAATTCTTGGAGCTGTTAACTTCATTACAACTGTAATGAATATGCGAGCACCAGGAATTAGTCTACACCGAATGCCTCTTTTCGTATGAAGTGTATTCGTAACTGTAGTTCTTCTTTTATTAGCTATACCCGTGCTAGCTGGTGCCATCACGATGCTATTAACAGATCGAAACTTTAACACAACTTTCTTTGATCCAGCCGGAGGAGGAGATCCTGTACTTTACCAGCATCTTTTC
604	1191	NCBI;cellular organisms;Eukaryota;Sar;Alveolata;Dinophyceae;Gymnodiniales;Gymnodiniaceae;	0	0	0	0	0	0	0	0	0	0	0	0	0	0	0	0	0	0	0	0	0	0	41	0	0	2	67	0	0	0	0	0	ATTAAGCACTTCTTTCATTAATTTATCACCTTCAAGTACAGTTTTTATGATATTTGGATTATTAATGTCAGGTATATCCTCATCTCTCACATCTCTTAACTTTTGGACAACAATATTAAATCTGAGATCTTATTATCTGTCATTAAAGACTATACCATTATTCCCTTGAGCTCTCTTAATAACAGGAGGAATGCTTTTATTAACATTACCAATCTTATCTGGAGCTCTTCTAATGATATTGGCTGATATTCATTCTAATACACTTTTCTTTGATCCAATCTTTGGAGGTGATCCTATATTCTATCAACATTTATTT
605	1192	NCBI;cellular organisms;Eukaryota;Opisthokonta;Metazoa;Eumetazoa;Bilateria;Protostomia;	0	0	0	0	0	0	0	0	0	0	0	0	0	0	0	0	7	0	9	0	0	0	40	2	0	0	42	0	0	0	0	0	TTTATCTAGTATAGAATTTCATTCAGGAGGTAGTGTAGATATGGCAATATTTTCATTACACTTAGCAGGAGTGTCATCGATTTTAGGTGGAGCGAATTTTATTACAACTATTGTAAATATGAGAGGAGAAGGTATTGGGTGATTTAAATTAGAATTATTTGTATGATCTGTATTAATTACAGCGGTATTATTAGTTCTTTCTTTACCTGTACTTGCAGGAGGTATTACTATGCTTTTAACAGATCGTAACTTAAATACAAGTTTTTATGATCCAGCAGGTGGTGGAGATCCGATATTATTTCAACATTTATTC
606	1194	NCBI;cellular organisms;Eukaryota;Sar;Alveolata;Dinophyceae;	27	16	3	79	29	1	32	44	126	19	223	10	1	0	4	1	23	0	1	0	6	5	4	1	0	10	3	4	0	0	0	0	ATTAAGCACTTCTTTCATGAGTTTATCACCTTCAAGTACAGGAAATCTTATTTTTGGATTATTAATCTCAGGAATATCTTCATGTTTGACATCTCTTAACTTTTGGACAACAATTCTAAATCTGAGATCTTATTATTTGACATTAAAGATTATGCCATTATTCCCTTGGGCTCTCTTGATTACAGGAGGAATGCTTTTATTAACATTACCAATCTTATCAGGAGCTCTTCTAATGGTCTTGGCTGATCTTCATTCTAATACACTTTTCTTTGATCCAATCTTTGGAGGAGATCCTATATTCTATCAACATTTATTT
607	1197	NCBI;cellular organisms;Eukaryota;Rhodophyta;Florideophyceae;Corallinophycidae;Hapalidiales;Hapalidiaceae;Melobesioideae;Lithothamnion;unclassified Lithothamnion;Lithothamnion sp. J JLR-2016;	0	0	3	0	0	0	0	0	0	0	0	0	2	0	0	0	2	0	0	0	0	0	9	0	0	0	0	0	0	0	0	0	GTTATCGAATAAACTAGGTCATGCAGGACCATCAGTTGACATGGCAATTTTTGCACTACATTTAGCTGGAGCCTCATCAATACTAGGGGCAGTAAATTTTATTACAACTATTTTAAATATGAGAACGCCAGGAATGACTATTCACAAGATGCCTCTTTTTGTATGGGCAATGCTTATTACAGCTTTCTTATTATTACTAGCTGTTCCTGTTCTTGCAGGAGCTATTACTATGCTTCTAACGGATAGAAATTTTGGAACCACATTTTTTAACCCAGCAGGTGGTGGAGATCCAGTTTTATTTCAACATTTATTT
608	1198	BOLD;Arthropoda;81.82	0	0	10	0	7	0	0	25	0	0	11	0	2	0	0	0	2	0	6	0	0	76	2	3	0	0	0	0	0	0	0	0	TTTATCTTCTAAGACTGGTCAGCCAGGTCCAGCAATGGATTTAGCAATTTTAAGCTTACATATTGCAGGCGCATCCTCAATTTTAGGAGCAATTAATTTTATTACTACAATTTTAAATATGAGAACCCCTGGAATGACATTGCACAAGATGCCCTTGTTTGCTTGGTCGATTTTAGTCACAGCGTTTCTTCTTCTTTTATCACTTCCAGTTTTAGCAGGAGCCATTACGATGTTGCTAACTGACAGAAACTTTGGAACTGCATTTTTTGAAGCGCAGACCGGAGGCGACCCAGTTTTATTTCAACACTTATTC
609	1202	NCBI;cellular organisms;Eukaryota;Opisthokonta;Metazoa;Eumetazoa;Cnidaria;Anthozoa;Hexacorallia;	0	0	1	0	2	0	0	15	0	0	59	0	0	0	0	2	2	0	0	0	0	11	0	0	0	0	0	0	0	0	0	9	TCTTTCGAGTAATTTGGGACATTCAGGTCCTGCCGTTGATATGGCTATATTGAGTTTACATTTAGCAGGAGCTTCATCCATTTTAGGGGCAATAAATTTTATAACAACCATATTTAATATGAGAACTCCTGAAATGACATTACATAGAATGCCTTTATTTGTCTGGTCCATTTTAGTTACAGTTTTTTTATTAGTATTATCTTTACCTGTATTAGCGGGAGCAATTACAATGCTTTTAACAGATCGTAATTTTGGCACGGCATTTTTTGCTCCAGAGGGCGGTGGTGATCCTATTTTGTTTCAGCATTTGTTT
610	1203	NCBI;cellular organisms;Eukaryota;Sar;Stramenopiles;Ochrophyta;Bacillariophyta;	0	0	0	0	0	0	0	0	0	0	0	0	0	0	0	0	0	0	0	0	0	0	0	0	0	0	0	0	59	0	0	0	ATTATCAGGTAGTATTGCTCATTCTGGTAGTTCTGTAGATTTAGCTATTTTTAGTTTGCATATTGCAGGTGCATCTTCTATTTTAGGAGCTATTAATTTTATATGTACTATATTTAATATGAGGGTTAAAAGTTTATCTTTTCATAGAATGCCTTTGTTTGTATGGTCTGTATTAATTACTGCTTTTTTATTGTTACTTTCTTTACCAGTATTAGCAGGAGCTCTTACAATGTTATTAACTGATAGAAATTTTAATACAACATTTTTCGATCCTGCTGGGGGAGGAGATCCTGTATTATATCAACATTTATTT
611	1204	NCBI;cellular organisms;Eukaryota;Opisthokonta;Metazoa;Eumetazoa;Bilateria;Protostomia;Ecdysozoa;Panarthropoda;Arthropoda;Mandibulata;Pancrustacea;Crustacea;Multicrustacea;Hexanauplia;Copepoda;Neocopepoda;Gymnoplea;Calanoida;Diaptomidae;Skistodiaptomus;Skistodiaptomus carolinensis;	0	0	0	11	0	0	0	0	0	0	0	0	0	0	18	0	0	0	0	0	0	37	0	0	0	0	0	0	0	0	0	0	TTTGAGAAATAACTTAGCACACTCTGGTCCTTCAGTAGACTTTGCTATTTTTGCACTTCATTTAGCTGGTGTTTCTTCTCTCTTAGGTGCTGTGAATTTTATTAGAACTTTCTCCAATCTTCGCAGGTTGGGAATACTTCTAGAGCGGGTACCTCTTTTTGGATGAGCTGTTTTAATTACCACTATCTTGCTACTCCTATCTCTCCCTGTACTCGCTGGAGCAATCACTATACTTCTCACTGATCGGAATTTGAATACAGCTTTTTATGACTCAAATGGGGGTGGGGACCCAATCCTTTATCAGCATTTATTT
612	1205	NCBI;cellular organisms;Eukaryota;Opisthokonta;Metazoa;Eumetazoa;Bilateria;Protostomia;Ecdysozoa;Panarthropoda;Arthropoda;Mandibulata;Pancrustacea;Crustacea;Multicrustacea;Hexanauplia;Copepoda;Neocopepoda;Gymnoplea;Calanoida;Calanidae;Canthocalanus;Canthocalanus pauper;	0	4	0	0	0	0	0	55	0	2	0	0	0	0	0	1	1	1	0	0	0	84	0	0	0	0	0	0	0	0	0	0	TCTATCTAGTAATATTGCACACGCAGGTGCCTCTGTTGATTTTGCTATTTTTTCTTTACATTTAGCAGGTGTAAGATCAATTTTAGGAGCTGTAAATTTTATTAGTACACTTGGTAACTTGCGTGTCTTTGGCATGTTATTAGACCGTATACCTCTTTTTGCATGAGCTGTGCTTATTACTGCAGTTCTTTTGCTGCTATCTTTACCTGTACTAGCAGGAGCCATTACCATACTTCTAACCGACCGTAACTTAAATACTTCATTCTATGATGTGGGAGGAGGAGGAGATCCTATTCTCTACCAACACTTATTT
613	1206	BOLD;Mollusca;73	0	6	0	0	0	0	1	1	0	0	9	0	2	0	0	0	0	0	0	0	0	39	0	2	0	0	0	0	0	0	0	0	GTTGGTCTTGCAAACAGGAGCTGCGTTTCCTTTTTTAATTTTTGCGGTTCACTTTTTAGGAGCATCGTCTATAGGGGGAGCTATCAACGTACTTGCAACTGTTTTTAATATGAGGGCACCAGGTATGACCTTATTAAAGTTGCCTCTATTCGTCTGGACTTGGATTATTACAGGGTTTCTTCTAATAGCATCCTTGCCGGTGCTAGCGGGTGCAGTGACGATGCTGTTAACTGATAAATACTTTGGAACTTCTTTCTTCAGTGCCGCTGGTGGCGGCGATCCAGTTATGTTCCAGCACATCTTT
614	1207	BOLD;Bacillariophyta;77.54	0	0	4	70	0	0	0	0	0	0	0	0	0	0	0	0	0	0	0	0	0	0	0	0	0	0	0	0	0	0	0	0	ACTATCATCAATTGAAGCTCACTCTGGGCCTTCAGTTGATCTAGCGATCTTTAGACTTCACTTAGCTGGTGCTTCTTCTATTCTAGGTGCTATTAATTTCATTACGACGATTTTAAATATGCGAAGACCTGGTATAACTATGCACCGGTTAAGGCTGTTCTGTTGAGCAGTTCTAATTACCGCCGTGTTACTACTATTATCTCTACCTGTACTAGCTGGTGCTATTACTATGCTACTAACGGATCGAAACTTTAACACTACGTTCTTCGATCCTGCGGGAGGTGGAGATCCTGTGCTTTACCAGCACTTATTC
615	1215	NCBI;cellular organisms;Eukaryota;Sar;Stramenopiles;Oomycota;Peronosporales;Peronosporaceae;Phytophthora;	0	0	0	0	0	0	0	0	0	0	0	0	0	0	0	0	0	0	0	0	0	0	65	0	0	0	16	0	0	0	0	0	ATTAGCTGGTTCATTATATCATCCAGGTCCTTCTGTAGATTTAGTAATATTTAGTTTACATATTGCAGGTATTTCTTCTATTTTAGGAGCTGTTAATTTTATTACAACTATTTTGAATATGCGATGTCCTGGTTTAACTATGTTTAAATTACCTTTATTTGTTTGGTCTGTATTAGTTACTGCTTTTCTTTTATTATTATCTTTACCAGTACTAGCAGGGGGTATTACAATGGTATTAACAGATCGTCATATGAATACAGCATTTTTTGATCCTAGAGGTGGAGGTGACCCTGTATTATACCAGCATTTATTT
616	1216	BOLD;Mollusca;Gastropoda;86.75	0	2	1	0	0	0	0	0	0	0	0	0	0	0	0	0	26	0	2	0	0	0	0	0	0	0	3	0	0	0	0	0	ATTATCTGGAATTAATGCCCATTCTGGTCCTTCTGTAGATTTAGCTATTTTTAGCTTACATATTGCAGGTATTTCCTCTATCTTCGGTGCAATTAATTTTATTACTACTATTTTTAATATGCGTTTACCAAATTTAACTATGTATAGATTACCTTTATACGTGTGAAGTGTTTTAATTACAGCCTTCTTATTATTATTATCTTTACCTGTTTTTGCTGGTGCTATTACTATGTTATTAACTGATCGTAATTTTAATACTACATTTTATGACCCAGCAGGTGGTGGTGATCCTATTTTATATCAACATTTATTT
617	1217	NCBI;cellular organisms;Eukaryota;Sar;Alveolata;Dinophyceae;	0	0	0	0	0	0	0	0	0	0	0	0	0	0	0	0	0	0	0	0	0	0	0	4	0	0	103	0	0	0	0	0	ATTAAGCACTTCATTTATGAGTTTATCACCTTCAAGTACAGGAAATCTTATCTTTGGATTATTAATCTCAGGTATATCCTCATGTCTCACATCACTTAAAATCTGAGATCTTATTATCTGACATTAAAGACTATGCCATTATTCCCTTGGGCTCTCTTGATTACAGGAGGAATGCTTCTATTAACATTACCAATCTTATCTGGAGCTCTAGTAATGGTTATGGCTGATCTTCATTCTAATACACTTTTGTTTGATCCAATCTTTGGAGGAGATCCTATATTCTATCAACATTTATTT
618	1218	NCBI;cellular organisms;Eukaryota;Sar;Stramenopiles;Ochrophyta;Bacillariophyta;Coscinodiscophyceae;Thalassiosirophycidae;Thalassiosirales;Skeletonemataceae;Skeletonema;	0	0	0	1	0	0	0	0	0	0	0	0	0	0	0	0	1	0	0	0	0	0	0	0	0	0	0	0	0	0	0	0	TTTATCAAGTGCAACAGCTCACTCTGGGGGGTCAGTAGACTTAGCAATATTTAGTTTACATTTATCAGGTGCATCTTCTATTTTAGGTGCTATTAATTTCATCTGTACTATTTTTAACATGCGAGTGAAAAGTTTATCTTTTCATAATCTTCCCCTATTTGTATGATCTGTTTTAATTACTGCATTTTTATTGTTATTATCTTTACCTGTATTAGCTGGGGCGATCACAATGTTATTAACAGACAGAAATTTTAATACTACTTTTTTTGACCCAGCTGGTGGAGGAGACCCTGTGTTATTCCAACACCTTTTT
619	1221	NCBI;cellular organisms;Eukaryota;Sar;Stramenopiles;Ochrophyta;	1	0	10	1	2	0	0	0	0	0	13	0	3	0	0	0	4	0	0	0	0	7	0	0	0	0	0	0	0	0	0	0	ATTAAGTAGTGCTCAAGCACACTCAGGGCCGTCAGTAGATTTAGCTATTTTTAGTTTACACCTTTCTGGTGCAGCCTCTATTTTAGGAGCTATTAATTTTATTACTACTATTTTTAATATGCGTGCTCCAGGTATGACTATGCATAGACTTCCACTATATGTTTGATCTGTTTTAGTAACTTCATTTTTATTACTTTTATCTTTACCTGTTTTAGCAGGAGCTATTACAATGTTATTAACTGATCGTAATTTTAATACTTCTTTTTTTGATCCAGCTGGTGGTGGAGATCCAATTTTATTTCAACATTTATTT
620	1224	NCBI;cellular organisms;Eukaryota;Opisthokonta;Metazoa;Eumetazoa;Cnidaria;Anthozoa;Hexacorallia;Ceriantharia;Cerianthidae;unclassified Cerianthidae;Cerianthidae sp. BMOO-09984;	8	0	7	0	0	0	0	0	0	0	0	0	0	0	0	18	63	0	5	0	0	0	0	1	0	0	0	0	0	0	0	43	CTTATCTAACTCAGACTTTCACGGTGGTCCGGCCGTGGATTTAGCAATTCTTAGTCTCCATTTAGCGGGCGCTTCTTCAATATTGGGCGCCATTAATTTTATAACAACCATCATTAACATGCGTGCTCCGGGCATGACTTTTCACAAGATGCCTCTGTTTATTTGGGCCGCCTTGATCACCGCTTTTCTGCTTTTATTGGCTATTCCGGTGTTAGCTGGTGCTCTCACTATGCTGCTTACAGATCGTAATTTTGGAACAGCTTTTTTTGAGCCGGCCGGCGGTGGGGACCCCATTTTCTGGCAGCATCTATTC
621	1225	NCBI;cellular organisms;Eukaryota;Opisthokonta;Metazoa;	0	0	0	0	0	0	9	0	0	0	0	0	0	0	0	0	1	0	0	0	0	176	0	0	0	14	0	0	0	0	0	0	TCTATCTGCTGCTATAGCTCATTCAGGACCATCTGTAGACATGGCCATATTCTCCCTACACTTGGCTGGGGCAAGTTCTATAATGGGTGCTATTAATTTCATAGTCACTATAGTTAATATGAGAACACCAGGTATGGACTGGTTTAATTTAAACCTATTTGTTTGAGCTGTGTTTATAACAGTAATTCTTTTATTACTTTCTTTACCTGTTTTAGCAGGAGCAATTACTATGCTTTTGACAGATAGAAACTTCAACACGACTTTTTTTGATCCCGTTGGTGGAGGAGACCCCATACTATACCAACACCTATTC
622	1228	NCBI;cellular organisms;Eukaryota;Opisthokonta;Metazoa;Eumetazoa;Bilateria;Protostomia;Spiralia;Gnathifera <animals>;Rotifera;Eurotatoria;Monogononta;Pseudotrocha;Ploima;Lecanidae;Lecane;Lecane inermis;	70	0	0	0	0	0	0	0	0	0	0	0	0	0	0	0	0	0	0	0	0	0	0	0	0	0	0	0	0	0	0	0	TCTTTCTGATGCTAAGTTTCATTCTGGTATTTCTGTAGATTTAGCTATTTTTAGGTTACATTTAGCTGGTGTATCTTCAATTCTAGGAAGAATTAACTTTTTAACAACTATCATTTGTTCTCGAACAACTAAAATGGTTTCAATAGATCGTTTGCCTTTGATGATTTGGGCTTTAGCTGTAACTGCTATTTTATTGGTTACTAGGTTGCCTGTTTTGGCTGGGGCTATTACTATGCTTTTAACTGATCGTAATTTTAATACTTCTTTTTTTGACCCTGCTGGTGGTGGGAATCCTGTACTATATCAGCATTTGTTT
623	1231	NCBI;cellular organisms;Eukaryota;Opisthokonta;Metazoa;Eumetazoa;Bilateria;Protostomia;	0	0	86	0	0	0	0	0	0	0	0	0	0	0	0	0	0	0	0	0	0	0	0	0	0	0	0	0	0	0	0	0	ATTATCTGATTCTAAATTTCATTCAGGTATTTCAGTTGATTTAGCTATTTTTAGTCTTCATTTAGCTGGTATTTCTTCTATTTTAGGAAGAATTAATTTTATAACAACTATTATTTGTTCTCGTACAACAAAAATAGTAAGAATAGATCGTCTGCCTCTTATGTTATGATCATTAGGTGTAACAGCATTTCTGTTATTAACTACTTTACCTGTATTAGCAGGTGCTATTACTATACTACTAACAGATCGTAATTTTAACACTTCTTTCTTTGATCCTTCAGGAGGAGGTAACCCTGTATTATATCAACATCTATTT
624	1232	NCBI;cellular organisms;Eukaryota;	0	3	1	0	0	0	0	0	0	0	7	0	0	0	0	0	1	0	0	0	0	68	0	0	0	0	0	0	0	0	0	0	ACTAAGTTCTATTCAAGGTCATCCTGGTCCTTCAGTTGACTTAGCTATTTTTTCTCTACATTTAGCTGGGGCATCATCAATTATGGGAGCGATTAATTTTATAACAACAATATTTAATATGAGAGCTCCTGGTATGACTATGCATAGATTACCTTTAATGGTTTGGGCTGTATTAATTACAGCGTTCTTATTATTATTATCTCTACCTGTTTTAGCAGGTGCTATTACAATGTTATTAACTGATAGAAATTTTAATACTACATTTTTTGATCCAGCTGGTGGAGGTGATCCTGTTCTTTACCAACATTTGTTT
625	1234	NCBI;cellular organisms;Eukaryota;Opisthokonta;Metazoa;Eumetazoa;Bilateria;Protostomia;Ecdysozoa;Panarthropoda;Arthropoda;Mandibulata;Pancrustacea;Crustacea;Multicrustacea;Hexanauplia;Copepoda;Neocopepoda;Podoplea;Cyclopoida;Cyclopidae;Mesocyclops;	0	0	0	0	0	0	19	64	0	0	0	0	0	0	0	0	0	0	0	0	0	0	0	0	0	0	0	0	0	0	0	0	TTTAAGAAGAAATTTAGCACACTCTGGCCCATCAGTTGATTTTGCTATTTTTTCTCTTCATTTGGCTGGAGTGTCGTCATTAATAGGAGCAGTAAACTTTATTAGTACAGTAGGAAACCTTCGTGTAATTGGAATTTTAATTGATGAAATACCTTTATTTGTTTGATCTGTTTTAATTACAACTATTCTTTTACTTCTTTCCCTTCCAGTATTAGCCGGAGCTATTACTATACTTCTTACTGATCGAAATTTAAATACTTCATTTTATGATCCTATAGGAGGAGGAGATCCAATTTTATACCAGCACTTATTC
626	1235	NCBI;cellular organisms;Eukaryota;Sar;Stramenopiles;Ochrophyta;Bacillariophyta;	0	0	4	0	0	0	0	0	0	0	0	0	3	0	0	1	13	0	2	0	0	0	0	0	0	0	0	0	0	0	0	0	ACTATCCAGCGGTGCTTCTCACTCAGGTGGAGCAGTTGACTTAGCTATTTTCAGCTTACATTTGTCAGGAGCTTCTTCTATTTTAGGTGCTATAAACTTTATTTGTACAATTTTTAACATGAGAGTAAAAAGCTTATCTTTCCACAAGTTGCCTCTTTTTGTTTGGGCTGTTCTTATAACTGCTTTTTTACTACTTCTATCATTACCAGTACTAGCAGGGGCTATAACCATGTTGTTAACAGATAGGAATTTCAATACTACCTTTTTTGACCCTGCAGGAGGAGGAGATCCTGTATTATACCAACATTTATTT
627	1240	NCBI;cellular organisms;Eukaryota;Sar;Alveolata;Dinophyceae;	0	0	0	0	0	0	0	0	0	0	0	0	0	0	0	0	3	0	0	0	0	0	44	3	0	0	32	0	0	0	0	0	ATTAAGCACTTCTTTCATGAGTTTATCACCTTCAAGTACAGCTTTCATGGTCTTTGGATTATTAATCTCAGGTATATCCTCATGTCTCACATCTCTTAACTTTTGGATAACAATTCTAAATCTGAGATCTTATTATTTGACATTAAAGACTATGCCATTATTTCCTTGGGCTCTTTTGATAACAGGAGGAATGCTTTTATTAACATTACCAATCTTATCAGGAGCTCTTTTAATGGTCTTGGCTGATCTTCATTCTAATACACTTTTCTTTGATCCAGTTTTTGGAGGAGATCCAATATTCTATCAACATTTATTT
628	1243	NCBI;cellular organisms;Eukaryota;Opisthokonta;Metazoa;Eumetazoa;	6	1	0	0	0	0	6	0	0	0	40	0	1	0	0	0	28	0	0	0	0	8	0	0	0	0	0	0	0	0	0	0	TTTAAGTAGTATTATTGCGCACTCAGGACCAGCCGTTGATATGGGTATTTTTAGCCTTCACTTAGCGGGTGCTTCTTCTATTATGGGAGCAATTAACTTTATTACAACTATTATTAATATGCGAGGTCCCGGGCTAAGTTGGCACAGACTTCCTTTATTTGTTTGGTCTGTTCTTATTACAGCCATTTTATTACTTTTATCGTTACCTGTATTAGCTGGTGCTATTACTATGTTATTAACAGATCGTAACTTTAATACAACTTTCTTTGATCCTGCCGGAGGTGGAGATCCTATCCTATTCCAGCACTTATTC
629	1247	NCBI;cellular organisms;Eukaryota;Sar;Stramenopiles;Oomycota;	0	6	1	1	0	0	0	0	0	0	38	0	15	0	0	0	0	0	0	0	0	1	0	0	0	0	0	0	0	1	0	0	GTTATCTAGTGTGCAAGCTCATTCAGGACCTTCAGTAGATTTAGCAATATTCAGTTTACATTTAGCAGGTGCTTCTTCTATTTTAGGTGCTATTAACTTTATTGTAACTATTTTTAATATGCGTTGCCCAGGTATGTTTATGCATAAATTACCTTTATACGCTTGAGCTGTTTTAATTACTGCAGTATTATTATTATTATCATTACCAGTATTAGCAGGTGCTATTACTATGTTATTAACTGATAGAAATTTCAATACTACATTCTTTGACCCAGCTGGTGGGGGAGATCCTATATTATATCAACATTTATTC
630	1249	BOLD;Mollusca;Gastropoda;87.95	3	0	1	1	0	0	0	0	0	0	0	0	0	0	0	0	44	0	0	0	0	0	0	0	0	0	0	0	0	0	0	0	TTTATCTAGTATTCAAGCGCATTCTGGACCTTCGGTTGATTTAGCTATTTTTAGTTTACATTTAGCTGGTGCATCGTCAATATTAGGGGCAGTTAATTTTATTACAACTATTTTTAATATGCGTAGTCCTGGAATGAAAATGCATAAATTACCTTTATTTGTTTGAGCTGTTTTAGTGACAGCTGTTTTATTATTATTATCGTTACCTGTTTTAGCAGGAGCTATTACAATGTTATTAACAGATCGTAATTTTAATACAACATTTTTTGATCCTGCAGGTGGTGGTGATCCTGTTTTATATCAACATTTATTT
631	1250	NCBI;cellular organisms;Eukaryota;Opisthokonta;Metazoa;Eumetazoa;Bilateria;Protostomia;Ecdysozoa;Panarthropoda;Arthropoda;Mandibulata;Pancrustacea;Crustacea;Multicrustacea;Hexanauplia;	0	0	0	0	0	0	0	0	0	0	0	0	0	0	0	0	0	0	0	0	0	0	0	0	0	0	71	0	0	0	0	0	TTTGAGAAGAAATATTGCCCATTCAGGTCCTTCCGTGGATTTTGCTATTTTTTCTCTTCATTTAGCTGGTGTTTCATCTTTATTAGGTGCTGTTAATTTTATTAGAACTTTAGGGAATTTGCGAACATTTGGAATTTTTTTAGACCGTATACCTTTATTTGCTTGAGCTGTATTAATTACTGTTGTTTTGTTGTTACTTTCTTTACCTGTGTTAGCTGGAGCGATTACAATATTATTAACAGATCGAAATTTAAATACTTCATTTTATGATCCGAGAGGTGGGGGTGACCCCATTTTGTATCAGCATTTATTT
632	1251	NCBI;cellular organisms;Eukaryota;Opisthokonta;Metazoa;Eumetazoa;Bilateria;Deuterostomia;Chordata;Craniata;Vertebrata;Gnathostomata;Teleostomi;Euteleostomi;Actinopterygii;Actinopteri;Neopterygii;Teleostei;Osteoglossocephalai;Clupeocephala;Euteleosteomorpha;Neoteleostei;Eurypterygia;Ctenosquamata;Acanthomorphata;Euacanthomorphacea;Percomorphaceae;Eupercaria;Labriformes;Labridae;Halichoeres;Halicho…	0	0	0	0	0	0	0	0	62	0	0	0	0	0	0	0	0	0	0	0	0	0	0	0	0	0	0	0	0	0	0	0	TCTAGCAGGGAATCTTGCCCACGCCGGTGCATCTGTAGACCTTACAATCTTTTCTCTCCACCTGGCCGGTATTTCGTCAATTCTTGGGGCCATTAACTTTATTACTACCATTATCAATATGAAGCCCCCTGCTATTTCCCAATACCAGACACCCCTGTTCGTCTGAGCCGTTCTAATTACAGCTGTCCTACTCCTTCTATCCCTCCCAGTGCTTGCCGCTGGCATCACAATGCTCCTTACAGACCGTAATCTTAATACTACGTTCTTTGACCCAGCTGGAGGGGGTGATCCCATCCTATACCAGCACTTGTTC
633	1252	NCBI;cellular organisms;Eukaryota;Rhodophyta;Florideophyceae;Corallinophycidae;Corallinales;Lithophyllaceae;Amphiroa;Amphiroa foliacea;	0	0	157	0	0	0	0	0	0	0	0	0	0	0	0	0	0	0	0	0	0	0	0	0	0	0	0	0	0	0	0	0	TTTAAGTTCAATTCAAAGTCATTCAGGTGCAGCAATTGATTTAGCTATTTTTAGTTTACATTTATCAGGTGCATCTTCAATTTTAGGAGCTGTAAATTTTATATCAACTATTCTAAACATGCGTAATCCTGGACAAAGTATGTATCGAATGCCTTTATTTATTTGATCAATTTTTGTAACAGCTATTTTATTACTTTTAGCAGTTCCAGTATTAGCGGGTGCTATTACAATGTTATTAACTGATAGAAATTTTAATACATCTTTTTTTGATCCCGCAGGAGGAGGAGATCCTATTTTATATCAACATTTATTC
634	1253	NCBI;cellular organisms;Eukaryota;Sar;Stramenopiles;Ochrophyta;Bacillariophyta;Bacillariophyceae;Bacillariophycidae;Naviculales;	0	0	0	0	0	0	0	0	0	0	0	0	0	0	0	0	65	0	0	4	0	0	10	0	0	0	19	0	0	0	0	0	ATTAGCAAGTATAACTGCGCATTCTGGCGGAGCAGTTGATCTAGCAATTTTTAGTTTACATCTTGCTGGAGCTAGTTCTATCTTAGGAGCTATTAATTTTATATGTACTATAACTAATATGAGATCAAAAAGTTTACCATTTCAAAAACTTCCTTTATTTTGTTGGTCCGTTTATGTTACGGCTATACTACTATTATTAGCATTACCGGTACTTGCGGGAGCAATAACAATGCTTTTAACTGATCGTAATTTTAATACTACTTTTTTTGATCCAGCTGGAGGAGGAGATCCGGTACTTTATCAGCATTTATTC
635	1256	NCBI;cellular organisms;Eukaryota;Opisthokonta;Metazoa;Eumetazoa;Bilateria;Protostomia;Ecdysozoa;Panarthropoda;Arthropoda;Mandibulata;Pancrustacea;Crustacea;Multicrustacea;Malacostraca;Eumalacostraca;Eucarida;Decapoda;Pleocyemata;Brachyura;Eubrachyura;Heterotremata;Portunoidea;Portunidae;Callinectes;Callinectes bellicosus;	0	1	0	0	0	0	0	0	0	0	0	0	0	0	0	0	0	0	18	0	0	0	0	0	0	0	0	0	0	0	0	23	TTTAGCGGCCGCTATTGCCCACGCAGGGGCCTCAGTGGATCTTGGTATTTTCTCTCTCCATTTGGCAGGTGTATCTTCTATTTTAGGAGCAGTTAACTTTATAACAACTGTTATTAACATACGATCTTTCGGTATAAGAATAGACCAAATACCACTATTCGTCTGATCTGTATTCATTACAGCTATTCTTCTTCTTCTCTCTCTCCCTGTCCTAGCCGGGGCTATCACTATACTTTTAACTGATCGAAATTTAAACACTTCGTTCTTTGACCCTGCTGGGGGAGGAGACCCCGTCCTCTACCAACACTTATTC
636	1260	NCBI;cellular organisms;Eukaryota;Sar;Alveolata;Dinophyceae;	0	0	0	1	0	0	0	0	0	0	89	0	0	0	0	0	0	0	0	0	0	0	0	0	0	0	0	0	0	0	0	0	ATTAAGCACTTCTTTCATGAGCTTATCACCTTCAAGTACAGGAAATCTTACCTTTGGATTATTACTCTCAGGTATATATGCATGTCTCACATCTCTTAACTTTTGGATAATGCCATTATTTCCTTGGGCTCTCTTGATCACTGGAGGAATGCTTTTATTAACATTACCAATCTTATCAGGAGCTCTTCTAATGGTCTTGGCTGATCTTCAGTCATCCGATCTTTGGAGGAGATCCTATATTCTATCAACTTGACACTTGTTT
637	1262	NCBI;cellular organisms;Eukaryota;Opisthokonta;Metazoa;Eumetazoa;Bilateria;Protostomia;Spiralia;Lophotrochozoa;Annelida;	0	0	0	0	0	0	0	0	0	0	0	0	0	0	0	0	83	0	0	0	0	0	0	0	0	0	0	0	0	0	0	0	TCTATCAGGTAATCTTGCACATGCCGGCCCTTCAGTGGACCTTGCAATCTTTTCCCTTCACCTCGCAGGGATCTCCTCTATTCTAGGTGCGCTTAACTTTATCACGACTGTAATTAACATACGGTGAAAAGGTCTGCGCCTAGAACGGATCCCACTATTTGTGTGGGCAGTGGTAATCACTGCAGTTCTCCTCTTACTCTCCCTACCTGTATTGGCAGGGGCTATTACCATACTTCTAACAGATCGAAACCTAAATACCGCGTTCTTCGACCCTGCTGGAGGGGGTGACCCTGTCCTATACCAACACCTTTTC
638	1265	NCBI;cellular organisms;Eukaryota;Opisthokonta;Metazoa;Eumetazoa;Bilateria;Protostomia;Spiralia;Lophotrochozoa;Mollusca;Bivalvia;Autobranchia;Pteriomorphia;Pterioida;Pterioidea;Isognomonidae;Isognomon;Isognomon legumen;	0	0	0	0	0	0	0	149	0	0	14	0	0	0	0	0	0	0	0	0	0	0	0	0	0	0	0	0	0	0	0	0	CTTTCTACTTATGTATATCATGGGAAAAGGGTAGACCTAGCTGTCTTTAGGCTTCATTTGGCCGGGATTGGATCCATTTTTGCTTCCATTAATTTTATTGTTACGGTGAGCAACATGAAGCTGGTGAGGTATAAGTTGCTTCCCTTGTTGCCCGTAAGCTTAACGGTTACTGGTTATATGTTATCTGTAGCTTTGCCGGTTTTGGCTGGTGGGCTTACGATGCTATTAGCTGATCGACACTTCAATACGAGTTTTTTTTATCCGCAGGGGGGCGGTGACCCTATTCTTTTTCAGCATGTGTTT
639	1266	NCBI;cellular organisms;Eukaryota;Opisthokonta;	1	53	0	0	0	0	0	0	0	0	1	0	4	1	0	1	0	0	0	0	0	36	0	1	0	0	0	0	0	0	0	1	TCTAGCAGGAATACAAGCACACTCTGGAGGTTCTGTAGATCTTGCTATCTTCAGCCTACATCTAGCTGGTGTGTCGTCAATCCTAGGAGCGATCAACTTTATTGTAACAATAGTCAATATGAGAGCGCCTGGTATGGTAGCTAGCAGAACACCTTTATTTGTATGAGCAGTGTTTATAACAGCCTTCCTATTGTTACTTTCTTTACCTGTATTAGCTGGTGCCATCACCATGTTACTAACAGATAGAAACTTTAATACATCTTTTTTTGATCCTAATGGTGGAGGTGACCCGGTGTTATACCAACACTTATTC
640	1268	NCBI;cellular organisms;Eukaryota;Sar;Alveolata;Dinophyceae;	0	10	0	1	0	0	0	0	7	0	0	0	0	1	0	0	2	0	0	0	0	0	93	5	0	0	60	0	0	0	1	0	ATTAAGCACTTCTTTTATGAGTTTATCACCTTCAAGTACAGGAAATCTTATCTTTGGATTATTAATCTCAGGCATATCCTCATGTCTCACATCTCTTAACTTTTGGATTACAATTCTAAATCTGAGATCTTATTATCTGACATTAAAGACTATGCCATTATTACCTTGGGCTCTCTTGATTACAGGAGGAATGCTTTTATTAACATTACCAATCTTATCAGGAGCTCTTCTAATGGTCTTTGCAGATCTTCATTCTAATACACTTTTCTTTGATCCAATCTTTGGAGGAGATCCTATTTTCTATCAACACTTATTT
641	1269	NCBI;cellular organisms;Eukaryota;Sar;Stramenopiles;Ochrophyta;Chrysophyceae;Chromulinales;Chromulinaceae;Pedospumella;unclassified Pedospumella;Pedospumella sp. LG-2014a;	0	0	7	0	0	0	0	0	0	0	1	0	5	0	0	0	0	0	0	0	0	63	0	0	0	0	0	0	0	0	0	0	ATTATCATCTAAAACTGGTCAACCGGGTCCAGCAATGGATTTGGCTATTTTAAGTTTACACATTGCAGGTGCTTCGTCGATTTTAGGAGCAGTGAATTTTATTACAACTATTCTAAATATGAGAACGCCTAGAATGACTTTACACAAAATGCCATTGTTTGCATGGTCAGTATTAGTTACAGCGTTTTTACTTTTATTATCACTACCAGTGTTAGCAGGTGCAATTACAATGCTATTAACTGACAGAAATTTTGGAACAGCTTTCTTTGAAGCACAAACCGGAGGAGATCCAGTATTGTTCCAACATTTATTC
642	1270	BOLD;Mollusca;84.14	0	0	0	0	0	24	0	0	0	0	0	0	0	0	0	0	0	0	0	0	0	0	14	0	0	0	18	0	176	0	0	0	ACTTGCAAGTATTTCATTTCATTCAGGAGGGGCTGTTGATTGTGCTATTTTTGCTCTTCACGCAGCAGGAGCTTCTTCGATTCTTGGAGCCGTTAACTTTATTACAACTATTTTAAATATGCGAGCACCTGGAGTTTCTTTACATCGAATGCCTTTATTCGTATGAAGTATTTTCGTAACTGTTGTTCTTCTTTTATTAGCAGTACCTGTACTTGCAGGAGCTATTACTATGCTATTAACAGATCGAAATTTTAATACAACTTTCTTTGATCCTGCTGGAGGAGGAGATCCTGTACTTTATCAGCATCTTTTC
643	1272	NCBI;cellular organisms;Eukaryota;Sar;Stramenopiles;Ochrophyta;PX clade;Phaeophyceae;Fucales;Notheiaceae;Notheia;Notheia anomala;	0	0	0	0	19	0	2	25	0	0	26	0	0	0	0	0	2	0	0	0	0	3	0	0	0	0	0	0	0	0	0	0	TCTTTCAAGTAATTTGGGACATTCAGGTCCAGCCGTTGACATGGCTATATTGAGTTTACATTTGGCAGGAGCTTCATCCATTTTAGGAGCAATAAACTTTATTACGACTATTTTTAATATGAGAACTCCTGAGATGACACTACATAGAATGCCTTTATTTGTTTGGTCCATTTTAGTTACAGTTTTTTTATTAGTATTATCTCTACCCGTGTTGGCAGGAGCAATTACAATGCTTTTGACAGATCGTAATTTTGGTACAGCGTTTTTTGCTCCAGAAGGAGGGGGAGATCCTATCTTATTTCAGCATTTGTTT
644	1273	NCBI;cellular organisms;Eukaryota;Opisthokonta;Metazoa;Eumetazoa;Bilateria;Protostomia;	0	0	1	0	0	0	0	0	0	0	0	0	0	0	0	106	3	0	0	0	0	0	4	0	0	0	0	0	0	0	0	22	TATGTCCGGGAAAGAGGGGACGCCTGGTATGTCCATGGATATGGCTATATTATCGCTTCATTTAGCGGGTGCATCTTCGATTTTAGGGGCTGCCAATTTCATAACAACGATATTCAACATGCGCGCTCCAGGGATGACTTTACATCGTATGCCCTTGTTTGCGTGGTCTATTCTGATAACGGCATTTTTACTTTTACTTGCTCTTCCCGTACTTGCGGGAGCAATTACAATGCTTCTTACGGATCGAAATTTTGGGACTACATTTTTTATCCCATCGGGTGGTGGAGACCCCATTTTATTTTTGCATCTGTTT
645	1275	NCBI;cellular organisms;Eukaryota;Opisthokonta;Metazoa;Eumetazoa;Bilateria;Protostomia;Ecdysozoa;Nematoda;Chromadorea;Rhabditida;Rhabditina;Diplogasteromorpha;Diplogasteroidea;Diplogasteridae;Micoletzkya;unclassified Micoletzkya;Micoletzkya sp. 4 VS-2014;	0	42	0	0	0	0	0	0	0	0	0	0	0	0	0	0	0	0	0	0	0	0	0	0	0	0	0	0	0	0	0	0	TGTCTCCAGTGTTACTAGACACCCTGGTGCTTGTGTAGATTGTGTCATTTTTGCCTTACATCTTGCTGGTGCTTCTTCCATTATAGGTGGAATTAATTTCATGACTACTGTACTTGTATTTGGTAGTGATGCCTATCGTATGGATGTGTTCTTATGAGCTTTCTTTATTACTGTGTTTTTACTGGTTTTATCTTTACCTGTCTTGGCTGCTGGGATTACGATGTTACTGTTTGATCGTAATGTTAATGCTATGTTCTTCGGTGAGATTGGGGGTGGTGACCCTGTGTTGTTCCAGCATCTCTTT
646	1279	BOLD;Heterokontophyta;84.14	0	2	4	0	0	0	0	5	0	0	29	0	3	0	0	3	8	0	0	0	0	9	0	0	0	0	0	0	0	0	0	0	TTTATCATCAATTCAAGCACACTCTGGTGGTTCTGTTGATTTAGCTATTTTTAGTTTACATTTAGCAGGTATTTCATCAATTTTAGGTGCTGCTAACTTTATTACTACTATTTGTAACATGCGTTTACCAGGTATGACTTTTCATAGAATGCCTTTATTCGTTTGAGCTGTTTTAATTACTGCGGTATTATTATTATTATCTTTACCAGTATTAGCAGGTGCTATTACTATGTTATTAACTGATAGAAACTTTAATACTACTTTCTTTGATCCAGCTGGTGGTGGTGATCCTGTATTATATCAACACTTATTT
647	1282	NCBI;cellular organisms;Eukaryota;Opisthokonta;Metazoa;Eumetazoa;Bilateria;	0	22	0	0	0	0	0	0	0	0	0	0	0	0	0	0	0	0	0	0	0	76	0	0	0	0	0	0	0	0	0	0	TCTTTCAAGCTTAGTAGGACACCAAGGAATGGGTGTGGATTTAGGAATCTTTAGAATACACATTGCGGGTGCCTCTAGAATTGGAGGTTCAATTAACTTCTTGTGTACGATCATTAACCTTCGATCTCCTTATGTGACCTGAGAAAAGCTACCTTTGTTTATTTGAGGGGTTTTTTTTACTGCAATTCTTTTAGTAGTATCTCTTCCTGTTTTTGCAGGAGGTATCACCATATTATTGACAGACCGTAATTTTAACACTTCCTTCTTTGATCCAAGAGGGGGAGGAGACCCTGTTTTGTTTGCACATCTTTTT
648	1283	NCBI;cellular organisms;Eukaryota;Sar;Stramenopiles;Ochrophyta;Bacillariophyta;	1	58	0	0	0	0	0	0	0	0	0	0	0	0	0	0	0	0	0	0	0	11	0	0	0	0	0	0	0	0	0	0	TTTATCAAGTGGTACTTCTCATTCGGGAGGTTCTGTGGATTTAGCTATTTTTAGTTTACATTTATCTGGAGCTTCTTCTATTTTAGGAGCTATAAATTTTATTTGTACTATTTTTAATATGAGAGTAAAAAGTTTAGCTTTCCATAAATTACCACTTTTCGTTTGGGCTGTATTAATTACTGCTTTTTTACTTTTATTATCTTTACCTGTTTTAGCTGGAGCGATTACTATGTTACTAACTGATAGAAATTTCAATACAACTTTTTTTGACCCTGCTGGAGGAGGAGATCCTGTATTATATCAACACTTATTT
649	1284	NCBI;cellular organisms;Eukaryota;Sar;Alveolata;Dinophyceae;	4	22	76	269	0	1	15	2	5	0	3	0	0	0	8	1	45	0	22	4	0	16	0	5	0	0	0	0	0	0	0	0	ATTAAGCACTTCTTTCATGAGTTTATCACCTTCAAGTACAGGAAATCTTATCTTTGGATTATTAATCTCAGGTATATCCTCATGTATCACATCTCTTAACTTTTGGACAACAATTCTTAATCTGAGATCTTATTATCTGACATTAAAGACTATGCCATTATTCCTTTGGTCTCTCTTGATTACAGGAGGAATGCTTTTATTAACATTACCAATCTTATCAGGAGCTCTTCTAATGGTCACAGCTGATCTTCATTCTAATACACTTTTCTTTGATCCAATCTTTGAAGGAGATCCTATATTCTATCAACACTTATTT
650	1286	BOLD;Cnidaria;75.95	2	0	0	0	0	0	0	0	0	0	4	0	0	0	0	16	10	0	0	0	0	4	0	0	0	0	0	0	0	0	0	7	TCTTTCAAGCTCGGCAGGTTCTCCAGGGATGGGTATGGACCTTGCAATATTTTCGCTACATTTAGCGGGCGCATCTTCTATTTTGGGTGCGGCAAATTTTATTACAACGATATTTAACATGAGGGCACCTGGAATGACACTTCATAAAATGCCATTATTTGTGTGGTCTATGCTAGTTACAGTGTTTTTGTTATTATTAGCTATACCTGTTTTGGCTGGTGCTATTACAATGTTACTTACTGATAGAAATTTTGGAACAAGTTTTTTCATTCCTGAAGGTGGTGGTGATCCAATATTATTTCTACACCTTTTT
651	1287	NCBI;cellular organisms;Eukaryota;Sar;Stramenopiles;Ochrophyta;Bacillariophyta;Bacillariophyceae;Bacillariophycidae;Bacillariales;Bacillariaceae;Cylindrotheca;Cylindrotheca closterium;	0	68	0	0	0	0	0	0	0	0	0	0	0	0	0	0	3	0	0	0	0	11	0	0	0	0	0	0	0	0	0	0	TCTTTCAGGAATTATTGCTCACTCAGGTGGTGCAGTAGATTTAGCAATCTTCAGTCTTCATTTATCTGGGATAGCCTCTATTTTAGGTGCAATTAATTTTATTTGTACTATCGTTAACATGAGAACTGAAAGTCTTCCGTTCCATAAGTTACCGCTATTTGTATGGGCTGTTTTCATCACTGCAATTCTATTATTATTATCTTTACCAGTATTAGCAGGTGCCATCACTATGTTATTAACTGATAGAAATTTTAATACTACATTTTTTGATCCTGCAGGTGGAGGTGATCCTGTATTGTACCAACATTTATTC
652	1289	NCBI;cellular organisms;Eukaryota;Opisthokonta;Metazoa;Eumetazoa;Bilateria;Protostomia;Ecdysozoa;Panarthropoda;Arthropoda;	0	0	0	0	0	0	1	4	119	0	35	0	0	3	0	0	0	0	0	0	0	0	0	0	0	0	0	0	0	0	0	0	TCTTTCAACCCCTTTTATGTCTCTATCTCCTTCATCTATTACCTCTTTAATCTTTGGTTTATTAGTTTCCGGTATTTCATCTGTCCTAACTTCCCTTAACTTCTTAATCACTATATTTAACCTGAGATCCTATTATATTACCCTTAAGACTTTACCTTTATTCCCTTGGTCTCTTTTAATTACTTCATCAATGCTTCTTTTGTGTCTCCCAATTCTAACTGGTGCTTTATTAATGCTTCTATCTGATTTATCATCTAATACTTTATTCTTTGACCCTATCTTTGGTGGAGATCCTATTCTTTATCAACATTTATTC
653	1293	NCBI;cellular organisms;Eukaryota;Sar;Alveolata;Dinophyceae;Peridiniales;Heterocapsaceae;Heterocapsa;	0	0	0	0	0	0	1	1	175	0	41	0	0	2	0	0	0	0	0	0	0	0	0	0	0	0	0	0	0	0	0	0	TCTTTCTACTTCTTTCATGTCTCTTTCTCCATCTTCTATCTATTTTCTAATTATTGGTCTACTAATTTCTGGTATTTCTTCCGCTCTTACTTCTCTAAACTTCTTCCTAACTATTCTAAACATGCGTATTTATTCCATGTCTCTAAAACTTCTACCACTATTTAATTGGTCTATTATTATCACTTCTGTTCTACTACTTGCAACTCTACCTATTCTTACAGGTGCTCTTATTATGATTCTTTCTGATCTAAACTCTAATACTCTATTCTATGATCCTACTTTCGGTGGTGATCCAGTTCTATATCAGCATCTCTTC
654	1296	NCBI;cellular organisms;Eukaryota;Opisthokonta;Metazoa;Eumetazoa;Bilateria;Protostomia;Ecdysozoa;Panarthropoda;Arthropoda;Mandibulata;Pancrustacea;Crustacea;Multicrustacea;Hexanauplia;Copepoda;Neocopepoda;Podoplea;Poecilostomatoida;Sapphirinidae;unclassified Sapphirinidae;Sapphirinidae sp. Co425.1.2;	0	17	0	0	0	0	0	0	0	0	0	0	6	0	0	0	0	0	0	0	0	0	0	0	0	0	0	0	0	0	0	0	ACTAAGGGGGAATCTAGCCCATGCAGGGGCCTCAGTAGATTTCGCTATTTTTTCTTTACATTTAGCCGGGGTGTCTTCCTTAATAGGGGCCGTAAATTTCATTAGCACTCTTGGGAATTTACGGGCAATAGGAATATTGATAGATCGAATGCCGCTATTTGCTTGATCCGTTTTGGTAACGGCGGTGCTGCTTCTTCTATCCCTCCCGGTCTTGGCCGGAGCTATTACGATGCTTTTAACCGACCGAAACTTCAATACCTCTTTCTATGACCCTAGAGGAGGGGGAGATCCTCTTTTATACCAACACTTGTTC
655	1297	NCBI;cellular organisms;Eukaryota;Sar;Stramenopiles;Oomycota;	0	0	0	0	0	1	0	0	0	0	0	0	0	0	0	0	1	0	6	0	0	0	68	9	0	0	50	0	6	0	0	0	ATTATCTAATGCTTTATTCCATTCTGGCCCTTCCGTAGATTTAGTTATATTTAGTTTACATATGGCAGGTATTTCTTCTATATTAGGTGCTGTTAATTTTATAACAACTATTTTTAATATGAGATCTCCTGGCTTAAGTATGCTTAAATTACCTTTATTCGTATGGTCTGTATTAATAACTGCCTTTTTATTATTATTATCTTTACCAGTATTAGCTGGTGCAATTACTATGGTGTTAACCGATCGTCATATGAATACCGTATTTTTTGACCCTAAGGGTGGTGGTGATCCTGTATTATACCAACATTTATTT
656	1298	NCBI;cellular organisms;Eukaryota;Opisthokonta;Metazoa;	1	0	0	0	2	0	0	0	0	0	0	0	5	1	0	0	2	0	0	0	0	44	0	3	0	0	0	1	0	0	0	0	ATTAGCGAGTATTTCAGCTCATCCAGGGCCAAGTGTTGATTTGGCGATTTTTAGTTTACATGTTGCAGGTGCAGGTTCAATTATGGGAGCTGTAAATTTTATTACAACAATTTTTAACATGCGAGCGCCTGGTATGAAAATGCATAATATGCCTTTATTTGTATGATCTGTATTAATTACAGCTTTTTTACTTTTATTGTCGTTACCTGTATTAGCAGGAGCTATTACAATGTTATTAACAGATAGAAATTTTAATACAACATTCTTTGATCCAGCAGGAGGGGGAGATCCTGTATTATATCAACATTTATTC
657	1300	NCBI;cellular organisms;Eukaryota;Opisthokonta;Metazoa;Eumetazoa;Bilateria;Protostomia;Spiralia;Lophotrochozoa;Annelida;Polychaeta;	0	0	0	0	0	0	0	0	131	0	0	0	2	1	0	0	5	0	0	0	0	0	0	0	0	0	0	0	0	0	0	0	ACTATCAAGAAATCTCGCCCATGCCGGACCGTCAGTAGATCTAGCAATTTTTTCTCTCCACCTAGCAGGTGTTTCATCCATTTTAGCATCCTTAAACTTCATTACGACAACAATCAATATACGATCTAAAGGCATACGAATAGAACGGGTTCCCCTATTTGTATGATCTGTTATAATTACAGCTATCCTTCTTCTTCTTTCCCTGCCGGTTTTAGCAGGTGCCATCACCATATTACTGACTGACCGTAACCTAAACACCGCATTCTTTGATCCGGCAGGGGGAGGGGACCCCGTACTATATCAACACCTCTTC
658	1304	BOLD;Ochrophyta;Phaeophyceae;86.27	0	0	0	0	4	0	0	15	0	0	8	0	3	0	0	0	0	0	0	0	0	9	0	0	0	0	0	0	0	0	0	0	TTTAAGTAGTGTTCAAGCTCATTCTGGACCTTCTGTAGATTTAGCTATTTTTAGTCTTCATTTATCGGGTGCTTCTTCTATTTTAGGTGCGATTAATTTTATCACGACTATTTTTAATATGCGTGCACCAGGTATGACTATGCATAGATTGCCTTTAATGGTTTGGGCTGTTTTAATCACAGCTTTTTTACTTTTATTATCTTTACCTGTGCTTGCTGGAGCTATTACTATGCTTCTTACAGATAGAAATTTTAATACTACCTTCTTTGATCCTGCGGGAGGAGGAGATCCTGTATTATACCAACACTTGTTC
659	1306	NCBI;cellular organisms;Eukaryota;Sar;Alveolata;Dinophyceae;	0	0	0	0	0	0	3	0	0	0	155	0	0	0	0	0	0	0	0	0	0	0	0	0	0	0	0	0	0	0	0	0	ATTAAGCACTTCTTTCATGAGTTTATCACCTTCAAGCACAGGAAATCTTTTCTTTGGATTATCACTCTCAGGTATATCTTCATGTCTCACATCTCTTAACTTTTAGATAATGCCATTATTTCCTTGGGCTCTCTTGATTACTGGAGGAATGCTTTTATTAACATTACCAATCTTATCAGGAGCTCTTCTAATGGTCTTGGCTGATCTTCATTCATCCAATCTTTGGAGGAGATCCTATATTCTATCAACACTTATTG
660	1307	NCBI;cellular organisms;Eukaryota;Eukaryota incertae sedis;Picozoa;unclassified Picozoa;Picobiliphyte sp. MS584-11;	0	8	1	0	6	0	0	0	0	0	3	0	3	0	0	0	10	0	0	0	0	42	0	1	0	0	0	0	0	0	0	0	TCTTGCAAGTATTCAGTTCCACTCTGGTGGTGCTGTTGATTGTGCTATTTTCGCACTTCACGTAGCAGGAGCTTCTTCTATTCTTGGAGCTGTTAACTTTATTACAACTGTAATGAACATGCGAGCTCCAGGTATCAGTCTTCACCGAATGCCTTTATTCGTATGAAGTATTCTTGTAACAGTAGTTTTACTTCTTTTAGCGGTACCCGTTCTTGCTGGTGCAATTACTATGCTACTAACTGATCGAAACTTTAACACTACATTCTTCGACCCTGCAGGGGGAGGAGATCCAGTTCTATACCAGCACTTATTC
661	1311	NCBI;cellular organisms;Eukaryota;Haptista;Haptophyta;Prymnesiophyceae;Prymnesiales;Chrysochromulinaceae;Chrysochromulina;unclassified Chrysochromulina;Chrysochromulina sp. NIES-1333;	0	2	0	0	0	0	0	0	0	0	0	0	1	0	0	1	2	0	0	0	0	0	0	0	0	0	0	0	0	0	0	0	TTTATCAGGTATATTAGCTCATTCTGGTGGTGCTGTAGACTGCGCTATTTATTCATTACATTTAGCTGGTGTTTCATCAATTTTAGGTGCTATTAACTTCATTGTTACTATCACTAATATGCGAGCTCCTGGTATGGCAGCAAACCGAACACCTCTGTTTGTTTGAGCTGTTTATATTACCGCATTTTTACTACTACTTTCGTTACCAGTTTTAGCTGGCGCTATAACTATGTTGTTAACTGATCGAAATTTTAACACTTCTTTTTTTGATCCAAACGGTGGTGGTGATCCAGTGTTATATCAACATTTATTT
662	1315	NCBI;cellular organisms;Eukaryota;Sar;Stramenopiles;Ochrophyta;Bacillariophyta;Bacillariophyceae;Bacillariophycidae;Naviculales;Pleurosigmataceae;Pleurosigma;Pleurosigma inscriptura;	0	0	2	0	0	0	0	0	0	0	0	0	0	0	0	0	1	0	34	0	0	0	0	0	0	0	0	0	0	0	0	0	ACTATCAAGTATTACAGCACATTCTGGAGGATCTGTAGATTTGGCGATTTTTAGTCTTCATTTATCAGGAGCAGCCTCTATTCTTGGAGCAATTAATTTTATTTGTACAATAACTAATATGAGAGCAAAAAGTTTACCATTCCATAGACTACCATTATTTGCTTGGTCAATTTTTATAACAGCTTTCTTATTATTATTATCATTACCTGTTTTAGCTGGTGCAATTACTATGCTATTAACAGACCGAAATTTTAATACAACATTTTTCGATCCAGCGGGAGGAGGTGATCCTGTATTATTTCAACATCTTTTT
663	1316	NCBI;cellular organisms;Eukaryota;Opisthokonta;Metazoa;Eumetazoa;Bilateria;Protostomia;	0	0	1	0	0	0	0	0	0	0	0	0	0	0	0	0	0	0	0	0	0	84	0	0	0	0	0	0	0	0	0	0	ATTATCATTACAGGGCGGGAATTCCATGCCATTTGTAATATTTTCACTTCATTTATTAGGGGCGTCGTCAATTCTCGGTGCTATAAACGTCATAGCTACAATTCTGAACATGAGAGCACCAGGTATGACGCTAATGAAGATGCCAATCTTTGTATGGACATGGCTTATAACCGCATTTCTACTTATTGCCGCTATGCCCGTACTAGCTGGTGCCATTACCATGTTATTGACGGATAGATTTTATGGAACTAGTTTCTTCACAGCTGCCGGTGGTGGAGACCCTGTTTTATTCCAGCATATATTC
664	1320	NCBI;cellular organisms;Eukaryota;Sar;Stramenopiles;Ochrophyta;Bacillariophyta;	0	0	118	0	0	0	0	0	0	0	0	0	0	0	0	0	0	0	18	0	0	0	0	0	0	0	0	0	0	0	0	0	TTTATCGAGTGGCACTTCTCATTCAGGGGGAGCAGTTGATTTAGCAATATTTAGTTTACACCTGTCAGGGGCTTCTTCGATTTTAGGGGCAATTAATTTTATCTGTACAATTTTTAATATGAGAGTAAAAAGTTTAGCATTTCATAAATTACCTTTATTTGTTTGGGCTGTGTTAATAACAGCTTTTTTATTATTATTGTCTTTACCAGTGCTTGCAGGAGCGATTACTATGTTGTTAACTGATAGAAATTTTAATACTACCTTTTTTGATCCTGCAGGAGGTGGAGATCCAGTTTTATATCAGCATTTATTT
665	1321	NCBI;cellular organisms;Eukaryota;Sar;Stramenopiles;Ochrophyta;Bacillariophyta;Mediophyceae;Cymatosirophycidae;Cymatosirales;Cymatosiraceae;Minutocellus;Minutocellus polymorphus;	0	0	0	0	0	0	0	0	0	0	0	0	0	0	0	0	40	0	13	0	0	0	0	0	0	0	0	0	23	0	0	0	GCTTTCAAGTGGAACTTCTCATTCAGGTGGTGCTGTTGATCTAGCTATTTTCAGTCTACACCTTTCAGGAGCTTCATCAATCCTAGGAGCAATTAACTTTATATGTACTATTTTCAATATGAGAGTGAAAAGTTTGTCATTCCACAACTTACCTCTGTTTGTTTGGGCTGTTTTAATTACGGCTTTTCTATTATTGTTGTCTTTACCTGTTTTAGCAGGAGCAATAACAATGTTATTGACTGATAGAAATTTCAACACTACTTTCTTCGATCCTGCGGGGGGAGGAGATCCTGTGCTATACCAACACCTCTTC
666	1322	NCBI;cellular organisms;Eukaryota;Opisthokonta;Metazoa;Eumetazoa;Bilateria;Protostomia;Ecdysozoa;Panarthropoda;Arthropoda;Mandibulata;Pancrustacea;Crustacea;Multicrustacea;Hexanauplia;Copepoda;Neocopepoda;Gymnoplea;Calanoida;Acartiidae;Acartia;Acartia negligens;	0	0	0	0	0	0	0	0	0	0	0	0	0	1	0	0	0	0	0	0	0	30	0	0	0	0	0	0	0	0	0	0	TTATCAAGCAATATTGCTCATGCAGGAGCTTCTGTTGATTTCGCTATCTTTTCCCTTCACCTGGCCGGAGTCAGGTCGATTTTAGGGGCAGTTAATTTTATTTCAACAGTGGGAAACTTGCGAGCATTTGGAATAGTTATAGATCGAATACCACTTTTCGGTTGGGCGGTTTTAATCACTGCCGTTTTACTACTTTTATCATTACCAGTACTAGCAGGAGCTATTACTATATTACTTACAGACCGTAATCTGAATTCATCGTTTTACGATGTTAGTGGGGGTGGGGATCCTATTTTATATCAGCACTTATTC
667	1323	NCBI;cellular organisms;Eukaryota;Rhodophyta;Florideophyceae;Corallinophycidae;Hapalidiales;Hapalidiaceae;Melobesioideae;Phymatolithon;unclassified Phymatolithon;	0	13	8	0	0	0	0	0	0	0	0	0	3	0	0	1	1	0	0	0	0	15	2	0	0	0	0	0	6	0	0	0	ATTATCCTCTAAAGCTGGTCAGCCTGGTCCAGCAATGGATTTAGCAATTTTAAGTTTACACTTAGCAGGTGCTTCTTCAATTTTAGGTGCTGTAAATTTTATTACTACGATTTTAAATATGAGAACTCCAGGTATGACATTACATAAGATGCCATTATTTGCTTGGTCAATTTTAGTAACTGCATTTTTATTACTATTATCTTTACCAGTTCTTGCTGGTGCAATAACGATGTTATTAACTGATAGAAATTTTGGAACTGCCTTCTTCGAGGCCCAAACCGGAGGTGATCCAGTTTTATTCCAACATTTGTTT
668	1325	NCBI;cellular organisms;Eukaryota;Opisthokonta;Metazoa;Eumetazoa;Bilateria;Deuterostomia;Chordata;Craniata;Vertebrata;Gnathostomata;Teleostomi;Euteleostomi;Actinopterygii;Actinopteri;Neopterygii;Teleostei;Osteoglossocephalai;Clupeocephala;Euteleosteomorpha;Neoteleostei;Eurypterygia;Ctenosquamata;Acanthomorphata;Euacanthomorphacea;Percomorphaceae;Ovalentaria;Ovalentaria incertae sedis;Pomacentrida…	4	0	0	0	0	0	0	2	0	0	25	0	0	0	0	0	0	0	19	0	0	0	0	0	0	0	0	0	0	0	0	5	ACTATCTGGCAACCTAGCTCACGCAGGGGCCTCCGTTGATCTAACCATCTTCTCCCTACATTTAGCAGGAATTTCATCCATTCTAGGGGCAATTAACTTTATTACCACTATCATCAACATAAAACCCCCTGCCATCTCCCAATACCAAACTCCCCTCTTCGTCTGAGCAGTACTAATTACCGCCGTCCTACTACTTCTTTCCCTTCCCGTATTAGCTGCCGGCATCACTATGCTTCTAACTGATCGAAACCTGAATACTACCTTCTTTGACCCAGCAGGGGGAGGAGACCCCATTCTTTACCAACACCTTTTC
669	1328	NCBI;cellular organisms;Eukaryota;Sar;Stramenopiles;Ochrophyta;PX clade;Phaeophyceae;	9	0	0	0	0	0	0	0	0	0	0	0	0	0	0	0	45	0	0	0	0	0	0	0	0	0	0	0	0	0	0	0	ATTATCAAGTATTGCAAGTCACTCTGGTGGGGCTGTAGACTTAGCTATTTTTAGTCTACACTTATCTGGAGCTTCAAGTATTTTAGGTGCTATCAATTTTATCACTACTGTAATTAATATGCGTGCTCCAGGTATGAGTATGCACCGTCTTCCATTATTTGTTTGGGCAGTTTTCATTACAGCATTTCTACTTCTACTTTCACTTCCAGTATTTGCTGGTGCGATTACTATGCTACTGACAGATCGAAATTTTAATACAACATTCTTTGATCCAGCCGGTGGTGGTGACCCAGTATTATATCAACACTTATTC
670	1331	NCBI;cellular organisms;Eukaryota;Sar;Stramenopiles;Ochrophyta;Bacillariophyta;	0	10	0	0	0	0	0	0	0	0	0	0	0	0	0	0	0	0	0	0	0	11	0	0	0	0	0	0	0	0	0	0	TCTTTCTAGTGGAAATTCTCATTCAGGAGCCTCGGTTGATTTGGCTATATTTAGTTTACATTTGTCTGGAGCTGCATCCATATTGGGAGCAATAAATTTTATATGTACTATTTTAAATATGAGAGTAAAAGGACTATTTATGCATAGATTACCTTTATTTGTTTGGGCCATTTTAATTACAGCTGTTTTGTTACTTTTATCTTTACCTGTATTAGCAGGAGCCATAACTATGTTACTTACTGATAGAAATTTTAATACAACATTTTTTGATCCTGCTGGTGGTGGAGATCCTGTTCTGTACCAACATTTATTT
671	1334	NCBI;cellular organisms;Eukaryota;Sar;Stramenopiles;Ochrophyta;Bacillariophyta;Coscinodiscophyceae;Coscinodiscophycidae;Melosirales;Stephanopyxidaceae;Stephanopyxis;Stephanopyxis turris;	0	0	4	0	0	0	0	0	0	0	0	0	0	0	0	0	6	0	24	0	0	0	0	0	0	0	0	0	0	0	0	0	GTTGTCTAGTGGTAATTCTCATTCAGGCCCTGCTGTAGATTTAGCTATATTTAGTTTACACTTGTCAGGAGCTTCTTCTATTTTAGGAGCAATTAATTTTATTTGTACCATTTTAAATATGAGAACTAAAGGGTTATTTATGCATAAATTACCTTTATTTGCCTGGTCAGTTTTAATAACAGCAGTTCTATTACTATTATCACTACCTGTATTGGCAGGAGCAATTACTATGTTAATTACTGACAGAAATTTTAATACAACCTTTTTTGATCCAGCAGGAGGAGGAGATCCTGTATTATATCAACATTTATTT
672	1337	NCBI;cellular organisms;Eukaryota;Opisthokonta;	0	1	2	0	4	0	1	8	1	0	19	0	0	0	0	0	18	0	2	0	0	17	0	0	0	0	0	0	0	0	0	0	TCTGTCAAGCATTTCAGGTCACTCAGGACCTTCTGTGGATCTAGCGATCTTTGCCTTGCACTTGTCGGGAGCATCATCCATCTTAGGAGCAATCAACTTCATTACAACCATCATCAACATGCGTTCACCAGGAATGGGAATGCACCGCATGCCTTTGTTTGTATGGTCTGTTCTGATTACTGCGGTACTACTTCTACTATCACTACCAGTGCTAGCGGGAGCGATTACCATGCTTCTAACTGACCGTAACTTCAACACAACATTCTTCGATCCTGCGGGAGGAGGAGACCCAATCCTATACCAGCACCTATTC
673	1338	NCBI;cellular organisms;Eukaryota;Stramenopiles;Bacillariophyta;Bacillariophyceae;Bacillariophycidae;Bacillariales;Bacillariaceae;Fragilariopsis;Fragilariopsis cylindrus;	0	0	0	0	0	0	1	0	0	0	0	0	0	0	0	0	0	0	0	0	69	0	0	0	0	0	0	0	0	0	0	0	TTTATCAGGAATTCTTTCACATTCAGGTGGTTCAGTAGATTTGGCTATTTTTAGTCTTCATTTATCTGGAGCAGCCTCAATATTGGGTGCAATTAATTTCATTTGTACAATTGTTAATATGCGAACTGAAAGTTTACCATTTCATAAACTACCATTATTTGTTTGGTCAGTCTTTATAACTGCCATTTTATTATTATTAGCCTTACCTGTATTAGCAGGAGCTATTACAATGCTTTTGACTGATAGAAATTTTAACACTACTTTTTTTGATCCAGCAGGCGGAGGAGATCCTGTCTTATTTCAACACTTGTTC
674	1344	BOLD;Cnidaria;83.5	0	0	0	0	0	27	0	0	0	0	0	0	0	0	0	0	0	0	0	0	0	0	38	0	0	0	0	0	43	0	0	0	ATTATCGAGTATTCAAGCTCATTCAGGTGGATCAATTGATTTAGCAATTTTTAGTTTACATTTAGCGGGTGCATCAAGTATTTTGGGAGCAATTAATTTTATAACAACAATATTTAATATGCGTGCTCCAGGAATGACAATGCATAGACTGCCGTTATTTGTATGGTCAGTATTAATAACAGCATTTTTATTAGTTTTATCGTTACCTGTATTAGCTGCAGCAATAACAATGTTATTAACTGATAGAAATTTTAATACAACTTTTTTTGATCCAGCTGGAGGAGGTGATCCAATCTTATATCAACATTTATTT
675	1346	NCBI;cellular organisms;Eukaryota;Opisthokonta;Metazoa;Eumetazoa;Bilateria;Protostomia;Ecdysozoa;Panarthropoda;Arthropoda;Mandibulata;Pancrustacea;	0	0	0	0	0	0	0	0	0	0	0	0	0	0	0	0	0	0	0	0	0	90	0	1	0	0	0	0	0	0	0	0	CTTAAGAAGTCACTTATTTCATGGAGGTCCCTCTGTGGACTTTGCTATTTTTAGACTACACTTAGCCGGGGTCTCATCACTCCTGGGAGCAATTAATTTTATTACAACAATCCTTAATCTACGAGTATTAGGAATAATTCTTGAACGAATACCTTTATTCCCTTGAGCTGTTCTAGTAACAGCAGTTCTATTACTCTTATCACTACCTGTACTTGCCGGGGCTATTACTATATTGCTAACGGACCGAAATCTCAACACCTCATTCTATGATCCTATAGGAGGAGGAGATCCTATCTTATATCAACATTTATTT
676	1347	NCBI;cellular organisms;Eukaryota;Opisthokonta;Metazoa;Eumetazoa;Cnidaria;Anthozoa;Octocorallia;Alcyonacea;Alcyoniina;Alcyoniidae;Sarcophyton;Sarcophyton tumulosum;	2	0	0	0	0	0	0	0	0	0	0	0	0	0	0	0	8	0	0	0	0	0	0	0	0	0	0	0	0	0	0	0	GTTAAGTAGCATCCAAGCTCATTCGGGAGGCTCTGTAGATTTAGCTATATTTAGTTTACACATAGCTGGAATTTCTTCCATTTTAGGTGCAGTTAACTTTATCACTACAATTTTTAACATGAGGGCGCCAGGAATGACTTTACATCGCCTTCCTCTTTTCGCCTGAGCAGTATTAATTACTGCAGTTCTCCTTCTTCTTTCTCTTCCTGTATTGGCAGGTGCGATCACAATGTTGTTGACAGATAGAAACTTTAATACAACATTCTTCGATCCTGCAGGTGGTGGGGACCCTGTTTTATATCAACACTTATTT
677	1351	BOLD;Arthropoda;Copepoda;85.44	0	12	10	7	0	0	0	19	0	0	4	0	0	0	0	0	3	0	6	0	0	15	9	3	0	0	0	0	0	0	0	0	TTTATCTTCTAAGACCGGTCAACCAGGGCCAGCTATGGATTTAGCAATTTTAAGTTTACACGTTGCAGGAGCTTCATCAATTTTAGGAGCGATTAATTTTATAACTACAATCTTAAACATGAGAACCCCTGGCATGACATTACACAAGATGCCATTATTTTCTTGGTCTATATTAGTTACAGCATTTTTATTGTTATTATCGTTACCAGTCTTAGCAGGAGCGATTACTATGCTTCTAACAGACAGAAACTTTGGAACAGCATTTTTTGAAGCACAAACAGGTGGTGATCCTGTTTTATTCCAGCACTTATTT
678	1352	NCBI;cellular organisms;Eukaryota;Opisthokonta;Metazoa;Eumetazoa;Cnidaria;Hydrozoa;Hydroidolina;Anthoathecata;Capitata;Corynidae;	0	0	0	0	0	0	0	3	0	0	5	0	10	0	0	1	0	0	0	0	9	3	0	0	0	0	0	0	0	0	0	0	TTTAGCGGGAATAGCAGCACATTCAGGGCCTTCTATAGATTTAGCAATCTTCAGTTTACATTTAGCAGGTGCTTCATCAATTTTAGGGGCTTCTAATTTTATTACAACTATAATGAATATGAGAGCACCGGGTATGTATTTACATAAAATGCCTTTATTCGTTTGGGCTGTTTTAATTACAGCAGTTTTATTATTACTATCTTTACCAGTTTTAGCAGGTGCTATTACTATGTTATTAACAGATCGTAATTTTAATACAACATTTTTTGATCCTGCAGGGGGAGGTGATCCTGTGTTATATCAACATTTATTC
679	1353	NCBI;cellular organisms;Eukaryota;Rhodophyta;Florideophyceae;Rhodymeniophycidae;Ceramiales;	2	27	0	0	0	0	0	0	0	0	1	0	7	0	0	0	4	0	4	0	0	8	2	0	0	0	0	0	0	0	0	0	TTTATCTAGCGCTTTAGGTCATTCTGGGCCTGCCGTAGATATGGCTATTTTGAGCTTACATTTAGCAGGAGCATCTTCAATTTTAGGTGCAATTAATTTTATAACAACAATCTTTAATATGAGAACACCAGGAATGACACTTCATAGAATGCCGTTATTTGTCTGGTCAATTCTTGTTACAGTATTTTTGTTAGTACTTTCACTTCCGGTGTTAGCAGGAGCAATAACAATGTTACTTACTGATAGAAACTTTGGTACTGCTTTTTTTGCACCAGAAGCAGGTGGAGATCCTATTCTTTTTCAGCATTTATTC
680	1354	NCBI;cellular organisms;Eukaryota;Sar;Rhizaria;Cercozoa;Chlorarachniophyceae;Bigelowiella;Bigelowiella natans;	0	0	0	0	0	0	0	0	0	0	0	0	1	0	0	0	12	0	0	0	0	22	0	0	0	0	0	0	0	0	0	0	ACTTTCAAGTATTCAATACCACCCTGGTGCGAGCGTAGATTTAGCCATTTTTAGCTTGCACATAGCTGGGGTTTCATCAATTGCTGGTTCTATTAATTTTATTACAACAGTTATAAATATGCGAGCGCCAGGTATGTACATGCACAGAATGCCTTTGTTTGCTTGAGCAGTTTTTATTACTTCGTGATTATTAGTTTTATCACTACCAGTTTTAGCTGGGGCTATTACTATGTTATTAACCGATAGAAATTTAAATACTGCTTTTTTTGATCCAGCAGGTGGCGGGGATCCGGTATTATATCAGCACTTATTT
681	1356	NCBI;cellular organisms;Eukaryota;Sar;Alveolata;Dinophyceae;Suessiales;Symbiodiniaceae;Symbiodinium;unclassified Symbiodinium;Symbiodinium sp. CCMP 2432;	0	0	0	0	0	0	11	4	0	0	22	15	0	0	0	0	0	0	0	0	0	0	0	0	0	0	0	0	0	0	0	0	TCTTTCTACTTCTTATATGTCATTATCCCCTTCATCTGTATCTTCTTTAATCTTTGGTTTATTAGTTTCTGGTATTTCTTCTGTACTCACTTCTATTAATTTCTTCATTACTATTCTTAACCTTAGATCCTATTCTCTTTCATTAAAGTCTATGCCATTATTTCCTTGGTCTCTCTTAATTACCTCTTCAATGCTTTTATTATGTTTACCTATTCTTACAGGAGCTCTATTAATGGTTTTATCTGATCTTTCATCTAATACTTTATTCTTTGACCCTATATTTGGAGGAGATCCTATTCTTTATCAACATTTATTC
682	1358	NCBI;cellular organisms;Eukaryota;Rhodophyta;Florideophyceae;Rhodymeniophycidae;Gelidiales;Gelidiaceae;Gelidium;	2	1	2	0	0	0	0	0	0	0	0	0	0	0	0	0	7	0	9	0	0	0	9	0	0	0	27	0	7	0	0	0	ATTGTCTCTTCAGGGCGGTGACTCAATGCCATTCGTTATTTTATCAATTCATTTATTAGGTCTTTCATCTATCTTAGGTGCGATTAATGTGATAGCAACTATACTTAATATGAGAGCCCCTGGAATGACGCTAATGAAAATGCCAATTTTTGTTTGGACTTGGTTAATTACAGCATTCTTATTAATTGCATCTATGCCTGTTTTGGCTGGCGCTATCACAATGTTATTAACTGATAGATTTTTTGGTACTACTTTTTTCACTGCATCTGGCGGTGGTGATCCTGTACTATTTCAACATATTTTC
683	1362	BOLD;Mollusca;82.5	0	0	0	0	0	0	0	0	0	0	0	0	0	0	0	0	0	0	0	0	0	0	0	0	0	0	75	0	0	0	0	0	ACTAAGCGACTTTAAATTTCACCCGGGGCCAGCTGTTGATTTAGCTATTTTTAGTTTGCATTTAGCTGGTGCATCTTCCTTGTTTGGAGCAATAAATTTTATAGTAACTATTGTTTATATGAGGGCAGCTTATATACCTTATTACAAGTTACCTTTGTTTGTATGGTCAGTATTTGTTACAGCCTGGTTACTACTATTATCTTTACCTGTTTTAGCAGCTGGTATAACAATGCTTCTAACGGATAGAAATTTTAATACTAGCTTTTTCGATCCAGCAGGTGGAGGAGATCCGATTTTATATCAGCACTTGTTT
684	1363	NCBI;cellular organisms;Eukaryota;Sar;Stramenopiles;Ochrophyta;Bacillariophyta;Coscinodiscophyceae;Rhizosoleniophycidae;Rhizosoleniales;Rhizosoleniaceae;Guinardia;Guinardia striata;	0	0	0	0	0	1	0	0	0	0	0	0	0	0	0	0	0	0	0	0	0	0	0	0	0	0	0	0	0	0	0	0	ATTATCTAGCGGTAATTCACACTCAGGAGCTTCAGTTGATTTAGCTATCTTTAGTTTACACTTATCAGGAGCTGCTTCTATATTAGGAGCTATAAATTTTATATGTACTATATTAAATATGCGTGTAAAAGGTTTATTTATGCACAGATTACCTTTATTTGTTTGGGCTATTTTAATTACTGCAGTATTGTTATTATTATCATTACCTGTTTTAGCAGGAGCTATAACTATGCTATTAACTGATAGAAATTTCAATACTACTTTTTTTGATCCTGCAGGAGGTGGTGACCCTGTTTTATATCAACATTTATTT
685	1367	NCBI;cellular organisms;Eukaryota;Sar;Alveolata;Dinophyceae;	7	4	0	1	0	0	0	0	0	0	5	0	0	0	0	1	0	0	0	0	0	25	1	0	0	0	3	0	0	0	0	0	TTTAAGTACTTCCATGATGAGTTTATCACCTTCAAATACAGCTTTTATCATCTTTGGATTATTCATGTCAGGTATATCCTCATGTCTGACATCTTTGAACTTTTTAACAACAATCTTGAATCTGAGATCTTATAATCTGACATGTAATACTATGCCATTATTTCCTTGGGCTATCCTTTTAACAGGAGGAATGCTAGTCTTCACATTGCCAATATTATCTGGAGGTCTTCTCATGGTCTTGGCTGATCTTCATTCTAATACAGTTTTCTTTGATCCAATCTTTGGTGGAGATCCTATATTATATCAACATTTATTT
686	1368	NCBI;cellular organisms;Eukaryota;Opisthokonta;Metazoa;Eumetazoa;Bilateria;Protostomia;Spiralia;Gnathifera <animals>;Chaetognatha;Sagittoidea;Aphragmophora;Ctenodontina;Sagittidae;Flaccisagitta;Flaccisagitta enflata;	0	0	0	0	0	0	0	0	0	0	0	0	0	0	0	0	0	0	0	0	0	0	94	0	0	0	0	0	0	0	0	0	GTTGTCAAGTGGGAGTTCGCATTCAGGAGCATCTGTAGATTTAGCTATTTTTAGTTTACATCTCTCAGGAGCAGCTTCAATATTAGGAGCTATCAATTTTATTACCACCATTTTTAATATGAGAGTTAAAGGATTGTTTATGCATAGATTGCCGTTGTTCGTTTGGGCTATTCTAATAACTGCTGTATTATTGCTTCTTTCTCTTCCTGTATTAGCTGGAGCTATAACAATGTTATTAACTGATAGAAACTTTAATACTACTTTTTACGACCCAGCAGGAGGAGGAGATCCTGTATTATATCAACATTTATTT
687	1369	NCBI;cellular organisms;Eukaryota;Sar;Alveolata;Dinophyceae;	23	3	18	16	2	0	62	5	0	0	25	2	0	7	1	0	14	0	0	0	0	2	0	0	0	0	0	0	0	0	0	0	ATTAAGTACAACTATGATGAGTCTATCTCCTTCTTCAACAGCTTTAATTATCTTTGGTCTCTTATTATCTGGTATATCCTCATGTCTCACATCTCTCAATTTCTTAACAACTATTCTCAATCTAAGATCTTATTCTCTGACATTAAAGACTATACCATTATTCCCTTGGGCACTCTTGATTACTGCAGGAATGCTTCTATTAACATTACCAATCTTATCTGGAGCTCTCCTAATGGTCTTAGCTGATCTTCATTCTAATACTCTTTTCTTTGATCCCATATTTGGAGGAGATCCTATATTCTATCAACATTTATTT
688	1370	BOLD;Chlorophyta;Ulvophyceae;85.88	0	0	0	0	0	0	0	0	0	0	0	0	0	0	0	0	2	0	0	0	0	0	99	4	0	0	22	0	26	0	0	0	ATTGGCAAGTGTACAAGCACACTCAGGACCTTCTATTGATTTAGCTATTTTTAGTTTACACTTAGCTGGAGCTTCTTCAATTTTAGGTGCTATTAATTTTATTACTACCATTATGAATATGCGAGCACCTGGTATGACCATGCATCGATTACCTTTATTCGTATGGGCAGTATTAATTACTGCAATTTTATTATTACTGTCATTACCTGTATTAGCAGGAGCTATTACTATGCTATTAACAGATAGAAATTTTAATACTACTTTCTTTGATCCAGCAGGAGGAGGTGATCCTATTCTATATCAACACTTATTC
689	1371	NCBI;cellular organisms;Eukaryota;Sar;Stramenopiles;Oomycota;	0	0	0	0	0	0	0	0	0	0	0	0	0	0	0	0	0	0	0	0	0	0	0	0	0	0	0	0	99	0	0	0	TTTATCCTCAATCCAAGCTCACTCTGGTGGTTCAGTAGATTTAGCTATTTTTAGTTTACACTTAGCAGGTATTTCATCTATTTTAGGTGCTGCTAATTTTATTACCACTATTATGAACATGCGTTGTCCTGGTATGACTATGCATAGAATGCCATTATTCGTATGATCTATATTTATTACTGCAATTTTATTATTATTATCATTGCCTGTATTAGCTGGTGCAATTACTATGTTATTAACTGATAGAAATTTTAATACTACTTTCTTCGACCCTGGTGGTGGTGGTGATCCAGTATTATATCAGCATTTATTC
690	1377	NCBI;cellular organisms;Eukaryota;Opisthokonta;Metazoa;Eumetazoa;Cnidaria;	0	1	5	0	2	0	0	1	0	0	4	0	0	0	0	1	6	0	1	0	0	64	2	1	0	0	0	0	0	0	0	11	TCTTTCAAGCTCAGCAGGTTCTCCAGGTATGGGTATGGACCTTGCAATATTTTCTCTACATTTAGCGGGCGCATCTTCAATATTAGGTGCAGCAAACTTTATAACAACAATATTTAACATGAGGGCACCTGGAATGACACTTCACAAAATGCCATTATTTGTGTGGTCTATGTTAGTTACAGTGTTTTTGTTGTTGTTAGCTATACCTGTGCTAGCTGGTGCAATAACGATGTTGCTGACTGACAGAAATTTCGGAACAAGTTTTTTTATTCCTGAAGGTGGTGGTGATCCTATTTTATTTTTGCATCTATTT
691	1378	NCBI;cellular organisms;Eukaryota;Sar;Stramenopiles;Oomycota;Oomycota incertae sedis;Haptoglossa;unclassified Haptoglossa;Haptoglossa sp. DM2 4/12;	4	0	0	0	2	0	1	20	0	0	19	0	0	0	0	0	12	0	0	0	0	0	14	0	0	0	0	0	0	0	0	0	TTTATCAAGCATCCAATATCATCCAGGTGCTAGTGTTGATCTCGCAATTTTTAGTTTGCATATAGCGGGTGTATCGTCTATAGCAGGTGCTATAAACTTTATTACTACAGTACTAAATATGAAAGCGCCTGGGATGTACTGGCATCGAACACCGTTATTTGTTTGGGCCGTTTTTATTACAGCGGTGTTACTTTTGTTATCGTTACCTGTTTTAGCTGGAGCTATTACTATGCTTTTAACAGATAGAAATCTTAATACTTCGTTTTTTGATCCTTCTGGAGGAGGTGATCCCGTATTATACCAACATTTGTTT
692	1380	NCBI;cellular organisms;Eukaryota;Opisthokonta;Metazoa;Eumetazoa;Bilateria;Protostomia;Ecdysozoa;Panarthropoda;Arthropoda;Mandibulata;Pancrustacea;Crustacea;Multicrustacea;Malacostraca;Eumalacostraca;Eucarida;Decapoda;Dendrobranchiata;Penaeoidea;Penaeidae;Penaeus;Penaeus vannamei;	0	1	0	0	0	0	0	0	0	0	0	0	0	0	0	0	0	0	24	0	0	0	0	0	0	0	0	0	15	0	0	4	TTTATCTGCCAGTATTGCTCACGCTGGAGCTTCAGTAGATCTTGGAATTTTCTCTCTTCACTTAGCTGGAGTATCTTCTATTCTGGGAGCAGTAAACTTTATAACAACTGTAATCAATATACGATCTACAGGAATAACTATAGACCGTATACCTCTATTTGTATGAGCAGTATTTATCACTGCTTTATTACTACTTTTATCATTACCAGTCTTAGCAGGAGCTATTACTATACTTTTAACAGACCGTAATCTTAACACATCATTCTTCGACCCAGCAGGAGGAGGAGACCCAGTTTTATATCAACATTTATTC
693	1381	NCBI;cellular organisms;Eukaryota;Sar;Stramenopiles;Ochrophyta;Bacillariophyta;Coscinodiscophyceae;	0	0	0	0	41	1	4	0	0	0	0	0	0	0	0	0	0	0	0	0	9	0	0	0	0	0	0	0	0	0	0	0	ATTATCAAGTGCAACAGCTCACTCTGGAGGATCTGTAGACTTAGCAATATTTAGTTTGCATCTATCTGGTGCATCTTCTATTTTAGGGGCAATTAATTTTATTTGTACAATTTTTAACATGCGAGTAAAAAGTTTATCTTTTCATAATCTTCCTTTATTTGTATGATCTGTTTTGATTACAGCATTTTTGTTATTATTGTCTTTGCCTGTTTTAGCAGGAGCAATCACAATGTTGTTAACAGATAGAAATTTTAACACAACTTTTTTTGATCCTGCTGGTGGTGGTGATCCTGTATTATTTCAACATCTTTTT
694	1384	NCBI;cellular organisms;Eukaryota;Opisthokonta;Metazoa;Eumetazoa;Bilateria;Protostomia;Spiralia;Lophotrochozoa;Annelida;Polychaeta;Sedentaria;Scolecida;Maldanidae;	0	0	0	0	0	0	0	0	0	0	122	0	0	0	0	0	0	0	0	0	0	0	0	0	0	0	0	0	0	0	0	0	TTATCAAGGGGCTTAGCCCACGCAGGCCCTTCTGTAGATCTTGCTATTTTCTCTCTCCATATTGCAGGGGCCTCATCTATTCTAGGAGCAATCAATTTTATCACAACAGCAATCAATATACGCCCTGAAGGCTTACAACTAGAACGAATGCCCTTATTTGTATGATCTGTAAAAATTACAGCCATCCTGCTTCTTCTCTCTTTACCCGTACTAGCAGGGGCCATTACTATACTTCTTACAGACCGAAACCTTAATACAGCCTTCTTCGACCCCGCAGGAGGTGGTGACCCCGTTCTATTCCAGCATCTATTC
695	1385	NCBI;cellular organisms;Eukaryota;Haptista;Haptophyta;Prymnesiophyceae;Prymnesiales;Chrysochromulinaceae;Chrysochromulina;unclassified Chrysochromulina;Chrysochromulina sp. NIES-1333;	0	0	0	0	0	59	0	0	0	0	0	0	0	0	0	0	3	0	0	0	0	0	6	0	0	0	0	0	0	0	0	0	ATTAGCAGGTATTCAAGCGCATTCTGGAGGTTCTGTTGATTGTGCTATATACTCCCTTCACTTAGCAGGTGTTTCATCTATTCTGGGTGCTGTTAATTTTATTGTAACAATTACAAATATGCGTGCACCAGGATTATCTGCAAACCGAACACCTTTATTTGTTTGATCGGTATATATTACAGCTTTTTTACTTCTACTTTCATTACCTGTTTTAGCTGGAGCAATCACAATGTTGCTTACTGACCGTAATTTCAATACTTCTTTCTTTGACTCAAATGGTGGTGGAGACCCTGTGTTGTACCAACATCTTTTT
696	1387	NCBI;cellular organisms;Eukaryota;Sar;Alveolata;Dinophyceae;	0	3	0	0	0	0	0	0	0	0	68	0	0	0	0	0	0	0	0	0	0	0	0	0	0	0	0	0	0	0	0	0	ATTAAGCACTTCTTTCATGAGTTTATCACCTTCAAGTACAGGAAATCTTATCTTTGGCTTATTAATCTCAGGTATATCTTCATGTCTCACATCTCTTAACTTTTGGACAACAATTCTAAATCTGAGATCTTATTATCTGACATTAAAGACTATGCCATTATTCCCTTGGGCTCTCTTCATTACAGGAGGAATGCTTTTATTAACATTACCAATCTTATCAGGAGCTCTTCTAATGGTCTTTGCTGATCTTCATGACAATACACTTTTCTTTGATCCAGTATTTGGAGGAGATCCTATATTCTATCAACACTTATTT
697	1389	NCBI;cellular organisms;Eukaryota;Opisthokonta;Metazoa;Eumetazoa;Bilateria;Protostomia;Spiralia;Lophotrochozoa;Annelida;Polychaeta;Sedentaria;Canalipalpata;Terebellida;Terebelliformia;Terebellidae;Thelepus;	0	0	0	0	0	0	0	0	0	0	0	0	0	0	0	0	0	0	0	0	0	0	0	0	0	0	100	0	0	0	0	0	ACTATCAAGTAATATAGCTCACGCAGGACCTTCAGTTGATCTAGCTATTTTTTCTCTTCATTTAGCAGGAGCTTCCTCAATTATAGCATCTGTAAATTTTATTTCAACCGTATTAAACTGCCGTATTAAAGGAATACGTCTTGAACGTATCCCTTTATTTGTTTGAGCCGTTCTAATCACTACAGTTCTTCTCTTACTTTCCCTTCCCGTTCTAGCAGGAGCTATTACTATACTACTCACTGATCGAAATATCAACACCGCATTCTTTGACCCGAGAGGAGGAGGGGATCCTATTCTATTCCAACACCTATTC
698	1390	NCBI;cellular organisms;Eukaryota;Rhodophyta;Florideophyceae;Rhodymeniophycidae;	0	0	0	0	0	0	0	0	0	0	0	0	0	0	0	30	0	0	0	0	0	0	3	8	0	0	0	0	0	0	0	35	ATTATCTAACAAACTCGGGCACGCAGGTCCTTCTGTTGATATGGCAATCTTTGCATTACATTTAGCTGGAGCTTCCTCAATATTAGGGGCTGTGAATTTCATAACGACAATTTTAAATATGAGAACTCCTGGAATGACTATTCATAAAATGCCTTTATTTGTATGGGCTATGTTAATCACTGCCTTCTTATTGCTATTGGCAGTACCAGTTTTAGCTGGAGCGATTACGATGCTCCTAACTGATAGGAATTTTGGAACTGCTTTCTTCAATCCAGCCGGTGGTGGAGACCCAGTTTTATTCCAACATTTATTC
699	1391	NCBI;cellular organisms;Eukaryota;Opisthokonta;Metazoa;Eumetazoa;Bilateria;Protostomia;Ecdysozoa;Panarthropoda;Arthropoda;Mandibulata;	0	0	0	0	0	0	0	1	0	0	0	0	0	0	0	11	0	0	0	0	0	0	100	3	0	0	11	0	2	0	0	27	TTATCCAATGCAGATTATCATCCCGGCCCAGCTGTGGATTTTGCTATTCTAAGTCTGCATCTAGCGGGAGCGTCTTCCATTCTTGGTGCAATTAATTTTATCACTACAATAATAAATATGCGTACACCGGGAATGAGTTTTCATAAAATGCCATTATTTATTTGGGCTTCGCTCGTTACAGCCTTTCTTTTATTATTAGCATTACCGGTCTTAGCCGGTGCGTTAACAATGCTTCTTACTGACCGTAATTTTGGCACCACTTTTTTTGAAGCATCGGGTGGTGGAGACCCAATTTTTTGGCAGCATCTCTTT
700	1393	NCBI;cellular organisms;Eukaryota;Opisthokonta;Metazoa;Eumetazoa;Bilateria;Protostomia;Ecdysozoa;Panarthropoda;Arthropoda;Mandibulata;Pancrustacea;Crustacea;Multicrustacea;Malacostraca;Eumalacostraca;Eucarida;Euphausiacea;Euphausiidae;Euphausia;	0	0	0	0	0	0	1	0	0	103	0	0	0	0	0	0	0	0	0	0	0	0	0	0	0	0	0	0	0	0	0	0	TTTAGCAGGAGGAATTGCTCATGCTGGAGCTTCAGTAGACATGGGTATTTTCTCACTTCATATTGCCGGAGCCTCATCTATTCTAGGAGCAGTTAACTTTATTACAACTGTTATTAATATACGATCTGCAGGTATAACTATAGACCGAATTCCATTATTTGTTTGATCAGTTTTTATTACTACAATTTTACTTCTTACATTACCAGTACTGGCAGGTGCTATTACCATACTTTTAACTGACCGTAATCTGAATACATCTTTCTTCGAACCTGCTGGAGGAGGAGACCCTATTCTATACCAACATTTATTT
701	1395	NCBI;cellular organisms;Eukaryota;Opisthokonta;Metazoa;Eumetazoa;Bilateria;	0	0	0	0	0	65	0	0	0	0	0	0	0	0	0	0	0	0	0	0	0	0	0	0	0	0	0	0	0	0	0	0	TTTATCAAGTGTTCAAGCACATTCTGGACCTTCTGTTGATTTAGCTATTTTTAGCTTACACTTAGCAGGAGCGTCTTCTATTTTAGGAGCTGTTAACTTTATTACAACAATTATTAACATGCGTCCACCAGGAATGACAATGCATAAAATGCCATTATTTGTATGGTCAGTTCTAATTACAGCAGTTTTACTGCTTCTTTCTTTACCAGTTCTTGCAGGAGCTATTACAATGCTTCTAACAGACCGTAATTTTAATACAACATTTTTCGATCCAGCAGGAGGAGGAGATCCTATTCTTTATCAGCACCTATTC
702	1396	NCBI;cellular organisms;Eukaryota;Sar;Stramenopiles;Oomycota;Saprolegniales;Saprolegniaceae;	0	0	0	0	0	0	0	0	0	0	0	0	0	0	0	0	0	0	0	0	0	0	67	0	0	0	111	0	0	0	0	0	CCTATCGAATTCCTTATACCACCCAGGACCTTCTGTAGATTTTGTAATATTTAGTTTGCATATCGCGGGTATTTCGTCTATATTGGGTGCTGTTAATTTTATTACTACTATTTTTAATATGAGATGCCCAGGTATGACTATGTTTAAATTACCTTTATTTGTATGGTCTGTTTTTATAACAGCTTTTCTTTTATTATTATCTTTACCTGTGTTAGCAGGTGGTATTACCATGGTTTTAACGGATCGTCATTTAAATACATCTTTTTTTGATCCTAAAGGTGGAGGTGATCCAGTTTTATACCAGCATTTATTT
703	1397	NCBI;cellular organisms;Eukaryota;Sar;Alveolata;Dinophyceae;	37	40	69	52	48	2	267	195	43	40	555	125	6	55	19	2	4	2	4	2	81	43	1	0	0	10	1	0	0	0	0	0	ATTAAGCACTTCTTTCATGAGTTTATCACCTTCAAGTTTGGGAAATCTTATCTTTGGATTATTAATCTCAGGTATATCCTCATGTCTCACATCTCTTAACTTTTGGATAACAATTCTAAATCTGAGATCTTATTATCTGACATTAAAGACTATGCCATTATTCCCTTGAGCTCTCTTGATTACAGGAGGAATGCTTTTATTAACATTACCAATCTTATCAGGAGCTCTCACTTTGGTCTTGGCTGATCTTCATTCTAATACACTTTTCTTTGATCCAATCTTTGGAGGAGATCCTATATTCTATCAACACTTATTT
704	1398	NCBI;cellular organisms;Eukaryota;Sar;Stramenopiles;Ochrophyta;Bacillariophyta;Coscinodiscophyceae;Chaetocerotophycidae;Chaetocerotales;Chaetocerotaceae;Chaetoceros;Chaetoceros socialis;	0	0	0	0	0	0	0	0	0	0	0	0	0	0	0	32	0	0	6	0	0	0	0	0	0	0	0	0	0	0	0	8	TTTATCTAGCGGTACATCACACTCAGGTGGAGCTGTAGATTTAGCTATTTTTAGTTTACACTTATCTGGGGCTTCATCAATTTTAGGAGCTATTAACTTTATTTGTACTATTTTTAATATGAGAGTTAAAAGTTTATCATTTCATAAATTACCTTTATTTGTATGGGCAGTGTTAATTACAGCATTTTTACTTTTATTATCACTACCAGTATTAGCAGGTGCTATTACAATGTTATTAACTGATAGAAATTTCAATACAACCTTTTTTGATCCAGCAGGAGGAGGTGACCCAATTTTATACCAACATTTATTT
705	1404	NCBI;cellular organisms;Eukaryota;Rhodophyta;Florideophyceae;	1	3	0	0	1	1	0	0	0	0	0	0	11	0	0	0	0	0	4	0	0	26	0	0	0	0	0	0	0	0	0	0	TCTTTCTGGATCAACAGGTTCACCAGGAATGGCTATGGATCTTGCAATATTTTCATTACATTTAGCTGGAGCATCTTCAATATTAGGTGCTGCTAACTTTATTACAACAATTTTTAACATGAGAGCACCAGGCATGACCCTTCATAAAATGCCATTGTTTGTTTGGTCTATGCTTGTTACAGCTTTTCTATTATTATTAGCTGTTCCAGTTCTTGCTGGTGCAATAACGATGTTGTTAACAGACAGAAATTTTGGAACTAATTTTTTCGTAGCGGAGGGTGGTGGAGATCCAATCTTATTTTTACATTTGTTT
706	1405	NCBI;cellular organisms;Eukaryota;Rhodophyta;Florideophyceae;Ceramiales;Rhodomelaceae;Chondria;Chondria crassicaulis;	0	2	3	0	0	2	0	0	0	0	0	0	0	0	0	0	2	0	4	0	0	0	26	0	0	0	1	0	0	0	0	0	TTTGTCATCTAAAACTGGTCAACCAGGGCCTGCAATGGATTTAGCAATTTTAAGTTTACATATCGCTGGAGCATCCTCTATTTTGGGTGCTATAAATTTTATAACTACAATTTTAAATATGAGAACTCCAGGAATGACGTTACATAAAATGCCATTATTTTCTTGGTCAATACTAGTAACAGCATTTTTATTACTATTATCTTTGCCAGTTTTAGCTGGTGCTATTACAATGTTGCTTACGGATAGAAATTTTGGAACAGCTTTTTTTGAAGCACAAACAGGCGGAGACCCAGTTTTGTTTCAACATTTGTTT
707	1406	NCBI;cellular organisms;Eukaryota;Opisthokonta;Metazoa;Eumetazoa;Bilateria;Protostomia;Spiralia;Gnathifera <animals>;Rotifera;Eurotatoria;Monogononta;Pseudotrocha;Ploima;	0	0	65	0	0	2	0	0	0	0	0	0	0	0	0	0	0	0	0	0	0	0	0	0	0	0	0	0	0	0	0	0	ATTAGCAGACTCTAAATACCATAGGGGTATTTCAGTAGATTTAGCTATTTTTAGACTTCATATTGCTGGTATTTCATCAATTTTAGGTAGAATTAACTTTTTGACTACAATTATTTGTTCTCGTACTACAAAGATAGTATCTTTAGATCGTATACCTTTAATAATTTGAGCATTAGCTGTAACAGCAGTTCTATTAGTTACAAGGTTACCAGTTCTTGCAGGTGCAATTACTATGCTTTTAACAGATCGTAATTTCAATACATCTTTCTTTGATCCAGCAGGAGGTGGAAATCCTGTTTTATATCAACATTTATTT
708	1407	NCBI;cellular organisms;Eukaryota;Opisthokonta;Metazoa;Eumetazoa;Bilateria;Protostomia;Spiralia;Gnathifera <animals>;Chaetognatha;environmental samples <arrow worms,phylum Chaetognatha>;Chaetognatha environmental sample;	0	2	2	0	0	0	0	2	0	0	0	0	0	0	0	0	0	0	10	0	0	19	1	0	0	0	0	0	0	0	0	4	TTTATCATCTAAAGCAGGTCAACCTGGACCAGCAATGGATTTAGCAATTTTAAGTTTACACTTAGCAGGTGCTTCTTCAATTTTAGGAGCAGTAAACTTTATTACAACAATCTTGAATATGAGAACTCCAGGCATGACTTTACATAAGATGCCTTTATTTGCTTGGTCAATCTTAGTAACAGCATTTTTATTGTTATTGTCTTTACCAGTTTTAGCTGGAGCAATTACAATGTTATTAACTGATAGAAATTTTGGAACCGCGTTCTTTGAAGCGCAAACCGGAGGAGATCCTGTTCTCTTTCAACATTTATTT
709	1408	NCBI;cellular organisms;Eukaryota;Sar;Stramenopiles;Ochrophyta;Eustigmatophyceae;Eustigmatales;Monodopsidaceae;Nannochloropsis;	0	0	1	0	19	0	0	1	4	0	8	0	0	0	0	0	0	0	0	0	36	0	0	9	0	2	0	0	0	0	0	0	ATTATCTAGTGTTCAAGCACACTCTGGACCTTCTGTAGACTTAGCGATCTTTAGTCTTCACTTAGCAGGTGCTTCCTCGATTATGGGTGCGGTGAACTTCATCACTACTATTCTAAACATGCGAGCTCCCGGTATCACTATGCACCGATTACCTCTATTCGTATGGGCGATCTTCATTACTGTTATTCTGTTATTACTTTCTCTGCCTGTTCTTGCAGCAGCGATTACTATGTTACTAACAGACCGTAACTTCAATACCACTTTCTTTGACCCGGCTGGAGGAGGTGACCCTGTATTATACCAGCACCTATTC
710	1409	NCBI;cellular organisms;Eukaryota;Rhodophyta;Florideophyceae;Rhodymeniophycidae;Gigartinales;Kallymeniaceae;Callophyllis;Callophyllis rangiferina;	0	0	0	0	0	0	0	0	0	0	0	0	0	0	0	0	0	0	0	0	0	0	66	0	0	0	20	0	0	0	0	0	TCTTTCGTTAAGAGAGCAAGGGCCTGCTGTTGATTTTATGATTATAACCTTACACATTAATGGGACATCTTCTTTAATGAACGCCATTAATATGTTTGTAACGATCTCTAACCAACGTTCCATGTCTTTGTACAACTTACAGATGTTTGTATGAACAATCTGGGTTACATCCTTTTTAGTTATTACGGCTATTCCAGTCCTAGCGGCTGCTTTATATATGTTATTTTCGGATAGACACTTCGGCTCTTGCTTTTTTGAACCGAGGGGGGGAGGAGATCCTATACTATACCAACATTTATTT
711	1410	NCBI;cellular organisms;Eukaryota;Opisthokonta;Metazoa;Eumetazoa;Bilateria;Protostomia;Ecdysozoa;Panarthropoda;Arthropoda;Mandibulata;Pancrustacea;	0	0	0	0	0	2	0	0	0	3	0	0	0	0	0	0	0	0	3	117	0	0	0	0	0	2	0	0	0	0	0	0	TTTATCAGCTAATCTTGCCCATGCTGGACCCTCTGTAGACTTAGCTATTTTTTCCCTTCATTTAGCTGGTGCTTCATCTATTCTTGGGGCACTAAATTTTATTACTACTGTATTGAATATACGTGTTCAAGGATTACGTATAGAACGAATACCTCTTTTTGTGTGAGCTGTCTTTATTACAGCCATTCTACTTCTTTTATCTCTCCCTGTTCTTGCTGGTGCTATTACCATGCTTTTGACAGACCGTAATATTAATACTACTTTCTTCGACCCTGCTGGGGGAGGGGACCCAATTCTTTATCAGCACCTTTTC
712	1411	BOLD;Bacillariophyta;Mediophyceae;87.7	0	0	26	22	0	0	0	0	0	0	0	0	0	0	0	0	0	0	1	0	0	0	19	0	0	0	19	0	0	0	0	0	ATTATCTAGTGCAACAGCCCATTCTGGTGGTTCTGTAGACTTAGCAATTTTTAGTTTACATTTATCAGGCGCATCATCAATCTTAGGTGCCATTAATTTTATTTGTACAATTTTTAATATGCGGGTAAAGAGTCTATCTTTTCACAATCTTCCTTTATTTGTTTGGTCTGTTTTAATTACTGCATTTCTATTACTGCTGTCTTTACCGGTATTAGCTGGTGCAATTACAATGTTATTAACAGATAGAAATTTTAACACTACTTTCTTTGATCCTGCAGGAGGCGGAGACCCTGTATTATTCCAACATCTTTTT
713	1414	BOLD;Mollusca;80.72	0	0	0	0	0	68	0	0	0	0	1	0	0	0	0	0	0	0	0	0	0	0	0	0	0	0	0	0	0	0	0	0	TTTATCCGCTGCTATAGCATCTAGCGGCCCTTCAGTGGACCTAGCAATTTTTAGCCTTCATTTAGCAGGAGTAAGTTCTTTATTAGGAGCAATAAATTTCATCGTAACCATCCTAAATAATAGGTCTCCGGAAGCATACTTTTTTAATCTTAATCTATTTGTTTGGTCGATACTAGTGACCGCTGTGTTGTTGCTTTTGAGTTTACCGGTCTTAGCTGGTGCCATTACTATGTTACTGACAGATAGAAATTTTAATACAACATTTTTTGATCCTAGTGGAGGTGGAGACCCAATATTATATCAGCATTTATTT
714	1415	NCBI;cellular organisms;Eukaryota;Opisthokonta;Metazoa;Eumetazoa;Ctenophora;Tentaculata;Cestida;Cestidae;	0	0	0	0	0	0	0	0	0	0	0	0	0	0	0	0	0	0	0	0	0	0	0	56	0	0	0	0	0	0	0	0	TCTATCTTTATATCCTTATAGTGCTTCCTGTTCTGCTGATTGTTTAATATTTTCCCTTCATTTAGCTGGTATATCTTCTATTTTATCTTCTATTAACTTTATAGTGTCTATGTTTTACTCTAATTTCTCTTATGAATACTTATTTGATTCATTTAATATCTTTATCTTTGCTCAATTAGTAGTTTCTGTGTTATTAGTTATATCTTTACCTGTTTTAGCTGCTGCTATTACTTTACTCTTATTTGATAGGAATTTTAATACCCAGTTCTTCTTCTCTAATGAGTTCATTAATGGTGATGTCTTATTATATCAACATTTATTC
715	1417	NCBI;cellular organisms;Eukaryota;Opisthokonta;Metazoa;Eumetazoa;Bilateria;Protostomia;Ecdysozoa;Panarthropoda;Arthropoda;Mandibulata;Pancrustacea;Crustacea;Multicrustacea;Malacostraca;Eumalacostraca;Eucarida;Decapoda;Pleocyemata;Brachyura;Eubrachyura;Raninoida;Raninoidea;Raninidae;Lysirude;Lysirude channeri;	0	0	0	0	0	18	0	0	0	0	0	0	0	0	0	0	0	0	0	2	0	0	30	0	0	0	13	0	0	0	0	0	GCTGTCGAATTCAGATTATCACCCTGGACCAGCTGTCGACTTTGGTATACTTAGCCTTCATCTTGCTGGGGCCTCATCAATTTTAGGTTCGATCAATTTTATAGTAACTATTGCAAATATGCGTGCGCCAGGGATGAGCATCCATCGAATGCCTCTTTTTGTATGGGCAATTTTAGTTACTGCTTTTCTATTACTTCTAGCAATTCCCGTTCTGGCGGGAGGGCTTACAATGTTGCTCACAGATCGTAATTTTGGAACAACTTTTTTTGAAATATCGGGAGGTGGTGATCCAGTTTTATGGCAGCATCTATTT
716	1419	NCBI;cellular organisms;Eukaryota;Opisthokonta;Metazoa;Eumetazoa;	5	36	19	1	2	0	0	12	0	0	6	0	2	0	0	1	14	0	8	0	0	20	6	1	0	0	0	0	0	0	0	0	TTTATCTTCTAAAACAGGTCAACCAGGTCCGGCAATGGATTTAGCAATTTTAAGTTTACACGTAGCAGGGGCTTCTTCTATCTTAGGAGCAATAAATTTCATTACTACTATTTTAAACATGAGAACCCCGGGTATGACTTTACATAAAATGCCATTATTCTCATGGTCGATATTAGTAACGGCGTTTTTACTTTTATTATCATTACCAGTTTTAGCTGGAGCAATCACAATGCTTCTAACGGATAGAAATTTTGGAACTGCATTCTTTGAAGCTCAAACAGGAGGAGATCCAGTTCTATTTCAACACTTGTTT
717	1420	NCBI;cellular organisms;Eukaryota;Opisthokonta;Metazoa;Eumetazoa;Bilateria;Protostomia;Spiralia;Lophotrochozoa;Mollusca;Gastropoda;Caenogastropoda;Neogastropoda;Muricoidea;Muricidae;Plicopurpura;	0	0	0	0	0	0	0	0	0	0	0	0	0	0	0	0	0	0	16	0	0	0	0	0	0	0	0	0	0	0	0	2	ATTAGCTGGAAATTTAGCTCATGCTGGAGGCTCAGTTGATCTTGCAATTTTTTCTTTACACTTAGCAGGTGTTTCTTCTATTTTAGGTGCGGTAAATTTTATTACTACTATTATTAACATACGATGACGAGGTATACAGTTTGAGCGACTTCCTTTATTTGTTTGGTCCGTTAAAATTACTGCTATTCTTCTTCTTTTATCTTTGCCTGTCTTAGCTGGAGCAATTACTATATTATTAACAGATCGAAATTTTAATACAGCATTTTTTGATCCTGCTGGTGGGGGAGATCCCATTTTATACCAACACCTTTTT
718	1421	NCBI;cellular organisms;Eukaryota;Opisthokonta;Metazoa;Eumetazoa;Cnidaria;Scyphozoa;Coronatae;Nausithoidae;Nausithoe;	0	0	0	0	0	0	0	0	0	0	0	0	0	0	0	0	0	0	0	0	0	0	0	0	0	55	0	0	0	0	1	0	TCTTTCAGCTCTAGAGACTCCTATGGATGCTATGATTTTTAGTCTGCATTTAGCCGGTATTAGTTCTATATTAGGAGCTATAAATTTTCTAACTACTATACTTATGAATGGCCCTAAAGGTTTCTCTATGTATAACTTGTATTTGTACCTGTATTGTATGGCTGTTACTGTATTCATGTTATTGACCACTTTACCTGTATTAGCCGCCGGCATAACTATGATTTTGTTTGATCGTCATTTTAATACTTCTTTTTTTAATGTCGCTGGAGGCGGTGATCCTATTCTGTTTCAACATCTTTTT
719	1422	NCBI;cellular organisms;Eukaryota;Opisthokonta;Metazoa;Eumetazoa;Cnidaria;Hydrozoa;Hydroidolina;	0	6	6	0	6	0	0	8	0	0	19	0	0	0	0	0	0	0	0	0	0	3	8	2	0	0	3	0	0	0	0	1	ACTCTCTTCAAAAACTGGTCAGCCGGGACCAGCAATGGATTTAGCAATATTGAGCTTACATATTGCCGGTGCTTCATCTATTTTAGGTGCGATTAATTTTATAACTACTATTTTAAATATGAGAACACCAGGCATGACATTACACAAAATGCCTTTATTTGCATGGTCTATTTTGGTTACTGCTTTTCTACTTCTTTTGTCTTTACCAGTTTTAGCCGGAGCTATTACAATGTTATTGACAGATAGAAATTTCGGTACAGCTTTCTTTGAAGCTCAAACAGGTGGAGATCCAGTTTTGTTTCAACACTTGTTC
720	1424	NCBI;cellular organisms;Eukaryota;Opisthokonta;Metazoa;Eumetazoa;	0	0	0	0	0	0	0	0	0	0	0	0	0	0	0	11	0	0	0	0	0	0	43	0	0	0	2	0	0	0	0	132	ACTTTCTTCTACTATTGGCTCACCCGGACCCGCTGTTGATTTAGCAATTTTTTCTCTTCACTTAGCAGGTGCCTCTTCAATTATGGGAGCTATTAACTTTATAACTACAATTTTCAATATGCGAGCTCCTGGAATGACCCTTCATAAAATGCCTTTATTTGTTTGGTCTATCTTAATAACAGCTGTTCTTTTATTGCTTTCTATGCCTGTTCTTGCTGGGGCAATAACGATGTTACTTACAGATAGAAACTTTGGAACTGCATTTTTTAGTGCTGCTGAAGGAGGTGACCCATTATTATTCCAACATTTATTT
721	1425	NCBI;cellular organisms;Eukaryota;Opisthokonta;Metazoa;Eumetazoa;Cnidaria;Cubozoa;Carybdeida;Carybdeidae;Carybdea;Carybdea brevipedalia;	0	0	0	0	0	0	0	0	0	0	17	0	0	0	0	0	0	0	0	0	0	35	1	1	0	0	0	0	0	0	0	0	TTTATCAAGTGCTTTAGGACATGCAGGACCGGCTGTAGATATGGCTATTTTAAGTTTGCATCTTGCTGGTGCTTCCTCCATTCTTGGAGCAATAAATTTTATAACTACTATTTTTAACATGAGAACGCCTGGTATGACATTACACAAGATGCCTCTTTTTGTTTGGTCCATTCTAGTTACAGTATTTTTGTTAGTTCTTTCACTGCCAGTTCTTGCAGGGGCAATTACCATGTTACTGACAGATAGAAATTTTGGTACCGCTTTCTTTGCTCCAGAAGCAGGCGGAGATCCTATTCTCTTTCAACATCTATTC
722	1426	NCBI;cellular organisms;Eukaryota;Opisthokonta;Metazoa;Eumetazoa;	10	0	0	0	0	0	0	0	0	0	1	0	0	0	0	0	37	0	0	0	0	0	0	0	0	0	0	0	0	0	0	0	ATTATCGGGTCCTCAAACTCATTCAGGTGGATCAGTAGATTTAGCTATATTCAGTTTACATTGTGCAGGTGCTTCATCCATTATGGGAGCTATAAATTTTATTACTACTATTTTTAATATGAGAGCTCCAGGACTAACTTTCGACAGATTACCACTATTCGTATGATCAGTTTTAATCACAGCTTTCTTATTACTATTATCATTACCAGTATTAGCAGGAGCTATTACTATGTTACTAACTGATAGAAATTTTAATACTACATTTTTTGATCCTGCAGGAGGAGGTGATCCAGTATTATATCAACATTTGTTT
[truncated: 4,773 more rows]

## Sheet: Table S4
TABLE S4. NUMBER OF READS AND TAXONOMIC ASSIGNEMENT OF OTUs DETECTED IN THE MOCK SAMPLE
#OTU ID	# Reads	NCBI/BOLD
1074	1	BOLD;Arthropoda;84.14
127	1	BOLD;Arthropoda;Copepoda;89.64
363	1	BOLD;Arthropoda;Copepoda;Calanoida;90.29
[truncated: 197 more rows]

## Sheet: Table S5
TABLE S5. SIGNIFICANCE OF THE KRUSKAL-WALLIS TEST FOR ALPHA DIVERSITY AMONG DEPTH LAYERS
[truncated: 38 more rows]

[truncated: 3 more sheets: Table S6, Table S7, Table S8]
